# Supplementary material for: Association between use of systemic and inhaled glucocorticoids and changes in brain volume and white matter microstructure: a cross-sectional study using data from the UK Biobank
Source: PubMed Central journal article supplement (PMC9438037; doi:10.1136/bmjopen-2022-062446), 2022-07-28
Supplement: bmjopen-2022-062446.draft_revisions.pdf [file bmjopen-2022-062446.draft_revisions.pdf]

# BMJ Open

BMJ Open is committed to open peer review. As part of this commitment we make the peer review history of every article we publish publicly available.

When an article is published we post the peer reviewers' comments and the authors' responses online. We also post the versions of the paper that were used during peer review. These are the versions that the peer review comments apply to.

The versions of the paper that follow are the versions that were submitted during the peer review process. They are not the versions of record or the final published versions. They should not be cited or distributed as the published version of this manuscript.

BMJ Open is an open access journal and the full, final, typeset and author-corrected version of record of the manuscript is available on our site with no access controls, subscription charges or pay-per-view fees (<http://bmjopen.bmj.com>).

If you have any questions on BMJ Open's open peer review process please email [info.bmjopen@bmj.com](mailto:info.bmjopen@bmj.com)

# BMJ Open

## Oral and inhalation glucocorticoid use associate with changes in brain volume and white matter microstructure: a cross-sectional UK Biobank study

|                               |                                                                                                                                                                                                                                                                                                                                                                                                                                      |
|-------------------------------|--------------------------------------------------------------------------------------------------------------------------------------------------------------------------------------------------------------------------------------------------------------------------------------------------------------------------------------------------------------------------------------------------------------------------------------|
| Journal:                      | <i>BMJ Open</i>                                                                                                                                                                                                                                                                                                                                                                                                                      |
| Manuscript ID                 | bmjopen-2022-062446                                                                                                                                                                                                                                                                                                                                                                                                                  |
| Article Type:                 | Original research                                                                                                                                                                                                                                                                                                                                                                                                                    |
| Date Submitted by the Author: | 02-Mar-2022                                                                                                                                                                                                                                                                                                                                                                                                                          |
| Complete List of Authors:     | van der Meulen, Merel; Leiden University Medical Center, Department of Medicine, division of Endocrinology<br>Amaya, Jorge Miguel; Leiden University Medical Center, Department of Medicine, division of Endocrinology<br>Dekkers, Olaf; Leiden University Medical Center, Department of Medicine, division of Endocrinology<br>Meijer, Onno C.; Leiden University Medical Center, Department of Medicine, division of Endocrinology |
| Keywords:                     | Magnetic resonance imaging < RADIOLOGY & IMAGING, Anxiety disorders < PSYCHIATRY, DIABETES & ENDOCRINOLOGY, INTERNAL MEDICINE, MENTAL HEALTH, Depression & mood disorders < PSYCHIATRY                                                                                                                                                                                                                                               |
|                               |                                                                                                                                                                                                                                                                                                                                                                                                                                      |

SCHOLARONE™  
Manuscripts

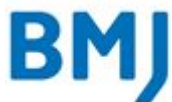

I, the Submitting Author has the right to grant and does grant on behalf of all authors of the Work (as defined in the below author licence), an exclusive licence and/or a non-exclusive licence for contributions from authors who are: i) UK Crown employees; ii) where BMJ has agreed a CC-BY licence shall apply, and/or iii) in accordance with the terms applicable for US Federal Government officers or employees acting as part of their official duties; on a worldwide, perpetual, irrevocable, royalty-free basis to BMJ Publishing Group Ltd ("BMJ") its licensees and where the relevant Journal is co-owned by BMJ to the co-owners of the Journal, to publish the Work in this journal and any other BMJ products and to exploit all rights, as set out in our [licence](#).

The Submitting Author accepts and understands that any supply made under these terms is made by BMJ to the Submitting Author unless you are acting as an employee on behalf of your employer or a postgraduate student of an affiliated institution which is paying any applicable article publishing charge ("APC") for Open Access articles. Where the Submitting Author wishes to make the Work available on an Open Access basis (and intends to pay the relevant APC), the terms of reuse of such Open Access shall be governed by a Creative Commons licence – details of these licences and which [Creative Commons](#) licence will apply to this Work are set out in our licence referred to above.

Other than as permitted in any relevant BMJ Author's Self Archiving Policies, I confirm this Work has not been accepted for publication elsewhere, is not being considered for publication elsewhere and does not duplicate material already published. I confirm all authors consent to publication of this Work and authorise the granting of this licence.

1  
2  
3 1 **Oral and inhalation glucocorticoid use associate with changes in brain volume and white matter**  
4 **microstructure: a cross-sectional UK Biobank study**  
5  
6  
7 3

8 4 **Authors:** Merel van der Meulen (0000-0002-0001-4408)<sup>1</sup>, Jorge Miguel Amaya<sup>1</sup>, Olaf M. Dekkers<sup>1</sup>,  
9 Onno C. Meijer (0000-0002-8394-6859)<sup>1</sup>  
10  
11 6

12  
13 7 <sup>1</sup> Department of Medicine, division of Endocrinology, Leiden University Medical Center, Leiden, the  
14 Netherlands  
15  
16 8

17 9  
18 10 Merel van der Meulen: PhD candidate

19 11 Jorge Miguel Amaya: PhD candidate

20 12 Olaf M. Dekkers: full professor

21 13 Onno C. Meijer: full professor  
22  
23 14

24  
25  
26 15 **Correspondence to:** Merel van der Meulen, [m.vandermeulen@lumc.nl](mailto:m.vandermeulen@lumc.nl), Department of Medicine,  
27 division of Endocrinology, Leiden University Medical Center, Leiden, the Netherlands  
28  
29 16

30 17  
31 18 **Tables:** 5

32 19 **Figures:** 2

33 20 **Word count:** 5214  
34  
35 21  
36 22  
37  
38  
39  
40  
41  
42  
43  
44  
45  
46  
47  
48  
49  
50  
51  
52  
53  
54  
55  
56  
57  
58  
59  
60

1  
2  
3 **23 Abstract (298 words)**

4 **24 Objective:** To test the hypothesis that oral and inhalation glucocorticoid use are associated with  
5  
6 **25** changes in grey matter volume (GMV) and white matter microstructure.

7  
8 **26 Design:** Cross-sectional population-based cohort study.

9  
10 **27 Setting:** UK Biobank.

11 **28 Participants:** After exclusion based on neurological, psychiatric, or endocrinological history, and use  
12  
13 **29** of psychotropic medication, 222 oral glucocorticoid users, 557 inhalation glucocorticoid users, and  
14  
15 **30** 24,106 controls with available T1 and diffusion MRI data were included.

16 **31 Main outcome measures:** Primary outcomes were differences in 22 volumetric and 14 diffusion  
17  
18 **32** imaging parameters between glucocorticoid users and controls, determined using linear regression  
19  
20 **33** analyses adjusted for potential confounders. Secondary outcomes included cognitive functioning (six  
21  
22 **34** tests) and emotional symptoms (four questions)

23 **35 Results:** Both oral and inhalation glucocorticoid use were associated with reduced white matter  
24  
25 **36** integrity (lower fractional anisotropy (FA) and higher mean diffusivity (MD)) compared to controls,  
26  
27 **37** with larger effect sizes in oral users (FA: adjusted mean difference (AMD) =  $-3.7e-3$ , -95% confidence  
28  
29 **38** interval (CI) =  $-6.4e-3$  to  $1.0e-3$ ; MD: AMD= $7.2e-6$ , 95%CI= $3.2e-6$  to  $1.1e-5$ ) than inhalation users (FA:  
30  
31 **39** AMD= $-2.3e-3$ , 95%CI= $-4.0e-3$  to  $-5.7e-4$ ; MD: AMD= $2.7e-6$ , 95%CI= $1.7e-7$  to  $5.2e-6$ ). Oral use was  
32  
33 **40** also associated with larger GMV of the caudate nucleus (AMD= $178.7 \text{ mm}^3$ , 95%CI= $82.2$  to  $275.0$ ),  
34  
35 **41** while inhalation users had smaller amygdala GMV (AMD= $-23.9 \text{ mm}^3$ , 95%CI= $-41.5$  to  $-6.2$ ) than  
36  
37 **42** controls. As for secondary outcomes, oral users performed worse on the symbol digit substitution  
38  
39 **43** task (AMD= $-0.17 \text{ SD}$ , 95%CI= $-0.34$  to  $-0.01$ ), and reported more depressive symptoms (OR= $1.76$ ,  
40  
41 **44** 95%CI= $1.25$  to  $2.43$ ), disinterest (OR= $1.84$ , 95%CI= $1.29$  to  $2.56$ ), tenseness/restlessness (OR= $1.78$ ,  
42  
43 **45** 95%CI= $1.29$  to  $2.41$ ), and tiredness/lethargy (OR= $1.90$ , 95%CI= $1.45$  to  $2.50$ ) compared to controls.  
44  
45 **46** Inhalation users only reported more tiredness/lethargy than controls (OR= $1.35$ , 95%CI= $1.14$  to  $1.60$ ).  
46  
47 **47 Conclusions:** Both oral and inhalation glucocorticoid use are associated with decreased white matter  
48  
49 **48** integrity and limited changes in GMV. This may contribute to the neuropsychiatric side effects of  
50  
51 **49** glucocorticoid medication, especially with chronic use.

52  
53  
54  
55  
56  
57  
58  
59  
60

1  
2  
3 51 **Strengths and limitations of this study**  
4

5 52 Strengths:

- 6 53 • To the best of our knowledge, this is the largest study to date assessing the effects of  
7  
8 54 glucocorticoid use on the brain, and the first to investigate these effects in inhalation  
9  
10 55 glucocorticoid users.  
11  
12 56 • Relatively strict exclusion criteria were used to limit the potential confounding that may arise  
13  
14 57 in observational cohort studies.  
15

16 58

17 59 Limitations:

- 18 60 • The cross-sectional nature of this study precludes formal conclusions on causality.  
19  
20 61 • Dose and duration of medication use were not available in the UK Biobank, making thorough  
21  
22 62 analyses on dose- or duration-dependant effects impossible.  
23  
24  
25  
26  
27  
28  
29  
30  
31  
32  
33  
34  
35  
36  
37  
38  
39  
40  
41  
42  
43  
44  
45  
46  
47  
48  
49  
50  
51  
52  
53  
54  
55  
56  
57  
58  
59  
60

## 63 Introduction

64 Due to their immunosuppressive properties, glucocorticoids are among the most prescribed drugs on  
65 the market, with an estimated annual prevalence of systemic glucocorticoid use between 0.5% and  
66 3%<sup>1-5</sup>. Although efficacious, both systemic and local (especially inhaled) glucocorticoids are  
67 associated with many potentially serious metabolic, cardiovascular, and musculoskeletal side effects  
68<sup>6-9</sup>. Besides these physical side effects, the use of synthetic glucocorticoids is also associated with  
69 neuropsychiatric symptoms and disorders, including depression, mania, delirium, and even a seven-  
70 fold increased suicide (attempt) rate<sup>10,11</sup>. In addition, on an anatomical level, both preclinical and  
71 clinical studies have shown long-lasting effects of glucocorticoid overexposure on the brain. In  
72 patients with chronic endogenous glucocorticoid excess due to a pituitary tumour (Cushing disease),  
73 it has been established that long-term glucocorticoid excess is associated with global cerebral  
74 atrophy<sup>12-18</sup> and decreased cortical thickness and grey matter volumes in specific brain regions<sup>13,18-</sup>  
75<sup>26</sup>. Some of these effects were detected even after ten years of biochemical remission<sup>22,23</sup>.  
76 Moreover, a few small studies have shown volumetric reductions in specific brain regions in patients  
77 using chronic and/or high-dose synthetic oral glucocorticoids<sup>27-31</sup>. Besides these structural  
78 abnormalities, several studies in animal models and patients with Cushing disease have also  
79 demonstrated widespread reductions in white matter integrity throughout the brain<sup>32-36</sup>.

80 However, most clinical studies investigating the effects of glucocorticoid overexposure on  
81 brain structure have been performed in small, selected populations with chronic glucocorticoid  
82 excess due to Cushing disease or oral glucocorticoid use. It remains unknown whether these  
83 consequences can also be observed in a broader sample of people using glucocorticoid, including  
84 inhalation glucocorticoids. We therefore used data from the UK Biobank, a large population-based  
85 cohort study, to investigate whether, at a population level, differences in brain volumes and white  
86 matter microstructure could be detected between oral or inhalation glucocorticoid users and non-  
87 users. As secondary outcomes, we also assessed potential differences in cognitive and emotional  
88 functioning.

89  
90

## 91 **Methods**

### 92 *Study design*

93 The UK Biobank is a large population-based prospective cohort, comprising over 500,000 participants  
94 aged 40-69 years at the time of recruitment (between 2006 and 2010)<sup>37</sup>. The protocol for the UK  
95 Biobank was approved by the North-West Multi-Centre Research Ethics Committee and all  
96 participants provided written informed consent for collection, storage, and use of their data. Data for  
97 the present study were obtained under application number 59004.

### 99 *Data collection*

100 Data were collected at the assessment centres and during an online follow-up. Data used for this  
101 study included data on demographic characteristics, health and medical history, brain imaging,  
102 cognitive and emotional functioning, and body composition. Data on demographic characteristics,  
103 cognition, and emotional functioning were collected using a touch screen device at the assessment  
104 centres. If patients had indicated that they did not want to answer a question on one or more of  
105 these characteristics, we coded this as missing. Data on health and medical history, including  
106 medication use, were collected using the touch screen device and a verbal interview (self-reported  
107 data), but also using hospital episode statistics (HES). Body composition was measured using body  
108 impedance on a Tanita BC418MA body composition analyser as described in the UK Biobank  
109 documentation<sup>38</sup>. The imaging acquisition is described in more detail below.

### 111 *Participants*

112 For the analysis presented in this study, we selected participants who

- 113 1. Had both T1-weighted magnetic resonance imaging (MRI) and diffusion tensor imaging (DTI)  
114 data available at the same imaging visit;
- 115 2. Did not have a history of psychiatric disease based on self-reported data or HES data, other  
116 than anxiety, depression, mania, and delirium, because anxiety, depression, mania, and  
117 delirium may be related to glucocorticoid use<sup>10</sup>;
- 118 3. Did not use psychotropic medication;
- 119 4. And did not have any neurological condition based on self-reported or HES data.

120 Individuals who met these criteria and used oral glucocorticoids at the time of imaging were included  
121 in the oral glucocorticoid patient group (n = 222), and individuals who met these criteria and used  
122 inhalation glucocorticoids (but no oral glucocorticoids) at the time of imaging were included in the  
123 inhalation glucocorticoid group (n = 557). Individuals who met these criteria but had not used oral or  
124 inhalation glucocorticoids at any timepoint (before and including the imaging visit) and did not have  
125 any endocrinological disorder according to self-reported or HES data, were included in the control



1  
2  
3 126 group (n = 24,106). A flowchart of patient selection is presented in Figure 1, and Supplement 1  
4 provides a list of all Biobank UK field codes that were used as inclusion or exclusion criteria.  
5 127  
6 128

### 8 129 *Imaging data*

9  
10 130 Our study made use of imaging-derived phenotypes (IDPs) generated by an image-processing  
11 131 pipeline developed and run on behalf of the UK Biobank. Details on the brain imaging acquisition  
12 132 protocols, imaging processing and quality control, and generation of IDPs are provided by the UK  
13 133 Biobank<sup>39,40</sup>. In short, all imaging was performed on a standard Siemens Skyra 3 Tesla scanner with a  
14 134 standard Siemens 32-channel radiofrequency receiver head coil. T1-weighted imaging was  
15 135 performed using a three-dimensional magnetization-prepared rapid acquisition with gradient echo  
16 136 sequence (3D MPRAGE) in the sagittal plane (voxel 1x1x1 mm; field-of-view 208x256x256 matrix). T1-  
17 137 weighted data were segmented using FAST (FMRIB's Automated Segmentation Tool <sup>41</sup>), to obtain  
18 138 volumes of cerebrospinal fluid (CSF), grey matter, and white matter, and to generate grey matter  
19 139 IDPs in 139 regions of interest (ROI). Subcortical structures were modelled using FIRST (FMRIB's  
20 140 Integrated Registration and Segmentation Tool <sup>42</sup>). For the present study, the mean volume of each  
21 141 bilateral structure was calculated over the two hemispheres, and the total cerebellar volume was  
22 142 calculated by adding up the volumes of all cerebellar lobules.  
23  
24  
25  
26  
27  
28  
29  
30

31 143 Diffusion imaging was performed using a standard Stejskal-Tanner pulse sequence to acquire  
32 144 50 distinct diffusion-encoding directions for two diffusion-weighted shells with b values of 1000 and  
33 145 2000 s/mm<sup>2</sup> (voxel 2x2x2 mm; field-of-view 104x104x72 matrix). The b = 1000 s/mm<sup>2</sup> data were fed  
34 146 into the diffusion-tensor-imaging (DTI) fitting tool (DTIFIT), which created DTI outputs including  
35 147 fractional anisotropy (FA) and mean diffusivity (MD). These outputs were then aligned to a standard-  
36 148 space white-matter skeleton using TBSS (Tract-Based Spatial Statistics <sup>43</sup>), and were averaged across  
37 149 a set of 48 standard-space tract masks defined by the John Hopkins University White Matter Atlas<sup>44</sup>.  
38 150 For the present study, the mean FA and MD of each bilateral structure of interest were calculated  
39 151 over the two hemispheres. Moreover, global FA and MD measures were calculated by averaging  
40 152 these metrics over all white matter tracts per individual.  
41  
42  
43  
44  
45  
46  
47  
48  
49

### 50 154 *Cognitive and emotional data*

51 155 At the assessment centres, participants also completed a series of cognitive tests and questionnaires  
52 156 on a touch screen. For these analyses, six cognitive tasks were selected: reaction time (to assess  
53 157 simple processing speed; expressed as mean time to correctly identify matches), trail making A and B  
54 158 (to test visual attention; expressed as the duration to complete the numeric (A) or alphanumeric (B)  
55 159 path), fluid intelligence (to test reasoning and problem solving; expressed as a fluid intelligence  
56 160 score, which is the number of correct answers given to 13 questions), symbol digit substitution (to

1  
2  
3 161 assess complex processing speed; expressed as the number of symbol digit matches made correctly  
4 162 within two minutes, with no maximum), and digit span (to test numeric working memory; expressed  
5 163 as the maximum digits remembered correctly, with a maximum of 12). For fluid intelligence, symbol  
6 164 digit substitution, and digit span tests, higher scores represent a better cognitive performance, while  
7  
8 165 for reaction time, and trail making A and B, higher scores represent a worse cognitive performance.  
9

10  
11 166 Moreover, we analysed four mental health questionnaire items that specifically asked about  
12 167 the participant's situation in the previous two weeks, in which the glucocorticoid users were likely  
13 168 already using glucocorticoid medication. These questions included the frequency of a depressed  
14 169 mood, disinterest, tenseness/restlessness, and tiredness/lethargy in the past two weeks, and were  
15 170 answered using categorical answer options ('Never', 'Several days', 'More than half of the days', or  
16 171 'Nearly every day'). The entire questionnaire can be found via:

17 172 <https://biobank.ndph.ox.ac.uk/ukb/ukb/docs/TouchscreenQuestionsMainFinal.pdf>.

18 173

#### 19 174 *Statistical analysis*

20 175 Demographic characteristics were presented as mean and standard deviation (SD) or number and  
21 176 percentage and were compared across the three groups using analysis of variance (ANOVA) or chi  
22 177 squared test, respectively.

23 178 The primary outcomes of this study were the differences in imaging parameters between  
24 179 glucocorticoid users and controls for a selection of ROIs (22 volumetric parameters, 14 diffusion  
25 180 parameters), that have previously been shown to be affected by long-term glucocorticoid exposure  
26 181 (see Supplement 2). As secondary outcomes, potential differences in cognitive and emotional  
27 182 outcomes between glucocorticoid users and controls were assessed.

28 183 For the imaging and cognitive outcomes, multivariable linear regression models were used.  
29 184 The assumption of normality of the residuals was assessed using quantile-quantile (Q-Q) plots and  
30 185 homogeneity of variance across the groups was tested using Levene's test and visually assessed using  
31 186 scatter plots. Subsequently, ANOVA was used to assess whether any differences in outcome  
32 187 parameters existed between oral glucocorticoid users, inhalation glucocorticoid users, and controls.  
33 188 To account for multiple testing, P values were adjusted using the Benjamini-Hochberg false discovery  
34 189 rate (FDR) method. For those parameters with P values < 0.05 after FDR correction, post-hoc Dunnett  
35 190 tests were used to make pairwise comparisons between oral glucocorticoid users vs. controls, and  
36 191 inhalation glucocorticoid users vs. controls.

37 192 For multivariable linear models of the imaging parameters, covariates included age, sex,  
38 193 education, a measure of head size (the volumetric scaling from T1 image to standard space,  
39 194 corresponding to the inverse of head size), measures of head position (X-, Y-, and Z-position of the  
40 195 head in the scanner, and table position), assessment centre, and year of imaging acquisition. This

1  
2  
3 196 selection was based on recommendations by the UK Biobank <sup>45</sup>, in addition to variables that  
4  
5 197 potentially meet the criteria of a confounder for this study. Because fewer than 1% of the  
6  
7 198 participants had missing values for the covariates, complete case analysis was performed for the  
8  
9 199 analysis of these primary outcomes, and all subsequent analyses.

10 200 For the cognitive outcomes, variables with non-normally distributed residuals (reaction time,  
11  
12 201 trail making A, trail making B) were normalized using log transformation. All cognitive outcomes were  
13  
14 202 transformed such that higher values indicate better performance, and then converted into Z scores.  
15  
16 203 The linear models of the cognitive outcomes were adjusted for age, sex, and education.

17 204 Since the emotional outcome parameters were categorical, logistic models were used,  
18  
19 205 adjusted for age, sex, and education. Per symptom, the participants who reported a frequency of  
20  
21 206 'Several days', 'More than half of the days', or 'Nearly every day' were grouped together and were  
22  
23 207 compared with participants who replied 'Never'. The likelihood ratio test was performed to  
24  
25 208 determine whether the proportion of patients experiencing a mental health complaint in the past  
26  
27 209 two weeks differed between the three groups. For those parameters with a statistically significant  
28  
29 210 difference after FDR correction, the odds ratio (OR) of experiencing a mental health complaint in the  
30  
31 211 past two weeks was calculated for each glucocorticoid user group compared to controls. P values  
32  
33 212 pertaining to the ORs were Bonferroni-corrected for multiple testing.

34  
35 213 Use of glucocorticoids is associated with weight gain and in particular with an increased body  
36  
37 214 fat percentage <sup>7</sup>, which has been reported to affect brain volume and white matter microstructure <sup>46</sup>.  
38  
39 215 Therefore, mediation analysis was performed to test whether the effects of glucocorticoid on brain  
40  
41 216 volume and white matter microstructure were mediated by body fat percentage (as measured by  
42  
43 217 body impedance). For this analysis, all three significantly different volumetric outcomes, and the two  
44  
45 218 (significantly different) global diffusion imaging parameters were considered. The mediation analysis  
46  
47 219 was performed using the *mediation* package, with 1000 simulations and including the same  
48  
49 220 covariates for imaging parameters as above.

50 221 Since the doses and duration of medication use are unknown in the UK Biobank, we were  
51  
52 222 unable to perform subgroup analyses based on dose or duration of glucocorticoid use. Because  
53  
54 223 inhalation glucocorticoid are expected to cause, on average, lower systemic concentrations of  
55  
56 224 glucocorticoid than orally administered glucocorticoid <sup>47</sup>, the inhalation glucocorticoid users likely  
57  
58 225 represent a group of patients exposed to lower systemic concentrations than patients using oral  
59  
60 226 glucocorticoid and might show less pronounced effects of glucocorticoid on brain parameters. This  
227 may give an indication of a dose-dependent effect of glucocorticoid on the brain. In addition, to  
228 assess whether we could identify potential duration- or cumulative dose-dependent effect of  
229 glucocorticoid use on brain parameters, we performed an additional analysis in the subgroups of  
230 glucocorticoid users who reported using glucocorticoid at two different visits (before and including

1  
2  
3 231 the imaging visit) and therefore likely represent a group of chronic or repeated glucocorticoid users.  
4  
5 232 Since the low number of participants in this group resulted in a limited power, we performed the  
6  
7 233 post-hoc tests for these subgroups not only on those parameters that were statistically significant in  
8  
9 234 the ANOVA, but on those parameters assessed by post-hoc tests in the main analysis, because this  
10  
11 235 allowed us to gain insight into the difference in effect size compared to the main analysis.

12 236 Lastly, to assess whether outlier values, possibly resulting from poor data quality or  
13  
14 237 processing problems, affected the imaging or cognitive outcomes, the analyses were repeated while  
15  
16 238 excluding outlier values of all outcome parameters (per outcome per study group), defined as more  
17  
18 239 than 1.5 interquartile range (IQR) below the first quartile or above the third quartile. In addition, a  
19  
20 240 sensitivity analysis of all outcome parameters was performed among all participants with imaging  
21  
22 241 data available, without exclusion based on psychiatric, neurological, or endocrinological history, or  
23  
24 242 medication use.

25 243 All statistical analyses and data visualization were performed in R (version 4.1.1)<sup>48</sup> using the  
26  
27 244 packages tidyverse (version 1.3.1)<sup>49</sup>, car (version 3.0-11)<sup>50</sup>, emmeans (version 1.7.0; [https://cran.r-](https://cran.r-project.org/package=emmeans)  
28  
29 245 [project.org/package=emmeans](https://cran.r-project.org/package=emmeans)), lmer (0.9-38)<sup>51</sup>, mediation (version 4.5.0)<sup>52</sup>, fauxnaif (version  
30  
31 246 0.6.1; <https://cran.r-project.org/package=fauxnaif>), ggpubr (version 0.4.0;  
32  
33 247 <https://rpkgs.datanovia.com/ggpubr/>), and cowplot (version 1.1.1; [https://cran.r-](https://cran.r-project.org/package=cowplot)  
34  
35 248 [project.org/package=cowplot](https://cran.r-project.org/package=cowplot)).

### 36 249 *Patient and public involvement*

37 250 Patients and the public were not directly involved in the design or implementation of this study,  
38  
39 251 since we used previously collected data.  
40  
41  
42  
43  
44  
45  
46  
47  
48  
49  
50  
51  
52  
53  
54  
55  
56  
57  
58  
59  
60

1  
2  
3 253 **Results**

4  
5 254 *Demographic characteristics*

6 255 In total, 222 patients using oral glucocorticoids, 557 patients using inhalation glucocorticoids, and  
7  
8 256 24,106 controls were included. As shown in Table 1, these groups did not differ significantly with  
9  
10 257 respect to sex, education, and smoking status, while the oral glucocorticoid group was slightly older  
11  
12 258 than the other groups (mean age  $66.1 \pm 7.2$  years for oral glucocorticoid users;  $63.3 \pm 7.5$  years for  
13  
14 259 inhalation glucocorticoid users;  $63.5 \pm 7.5$  years for controls), and the inhalation glucocorticoid group  
15 260 had a higher BMI and body fat percentage (Supplement 3.1).

16 261

17  
18 262  
19  
20  
21  
22  
23  
24  
25  
26  
27  
28  
29  
30  
31  
32  
33  
34  
35  
36  
37  
38  
39  
40  
41  
42  
43  
44  
45  
46  
47  
48  
49  
50  
51  
52  
53  
54  
55  
56  
57  
58  
59  
60

For peer review only

263 **Table 1.** Characteristics of included patients using oral glucocorticoids (n = 222), inhalation glucocorticoids (n = 557), and controls

|                                                     | Patients using oral GC (n = 222) | Patients using inhalation GC (n = 557) | Controls (n = 24106) | P value |
|-----------------------------------------------------|----------------------------------|----------------------------------------|----------------------|---------|
| <b>Sex: male, n (%)*</b>                            | 111 (50.0%)                      | 253 (45.4%)                            | 12154 (50.4%)        | 0.066   |
| <b>Age at time of scanning in years, mean (SD)*</b> | 66.1 (7.2)                       | 63.3 (7.5)                             | 63.5 (7.5)           | 2.4e-6  |
| <b>Education level, n (%)</b>                       |                                  |                                        |                      | 0.66    |
| College/University degree                           | 108 (48.6)                       | 287 (51.5)                             | 12058 (50.0)         |         |
| A levels or equivalent                              | 26 (11.7)                        | 66 (11.8)                              | 2930 (12.2)          |         |
| O levels/GCSE or equivalent                         | 38 (17.1)                        | 96 (17.2)                              | 4155 (17.2)          |         |
| CSEs or equivalent                                  | 9 (4.1)                          | 17 (3.1)                               | 879 (3.6)            |         |
| NVQ, HND, HNC, or equivalent                        | 6 (2.7)                          | 35 (6.3)                               | 1396 (5.8)           |         |
| Other professional qualifications                   | 13 (5.9)                         | 29 (5.2)                               | 1150 (4.8)           |         |
| None of the above                                   | 18 (8.1)                         | 25 (4.5)                               | 1311 (5.4)           |         |
| Missing                                             | 4 (1.8)                          | 2 (0.4)                                | 227 (0.9)            |         |
| <b>BMI in kg/m<sup>2</sup>, mean (SD)</b>           | 26.2 (3.9)                       | 26.7 (4.3)                             | 26.1 (4.1)           | 1.0e-3  |
| Number (%) missing                                  | 7 (3.2)                          | 20 (3.6)                               | 1325 (5.5)           |         |
| <b>Body fat percentage, mean (SD)</b>               | 30.9 (7.9)                       | 32.1 (8.3)                             | 30.2 (7.9)           | 3.5e-8  |
| Number (%) missing                                  | 7 (3.2)                          | 20 (3.6)                               | 1331 (5.5)           |         |
| <b>Smoking status, n (%)</b>                        |                                  |                                        |                      | 0.44    |
| Current                                             | 6 (2.7)                          | 11 (2.0)                               | 647 (2.7)            |         |
| Previous                                            | 76 (34.2)                        | 200 (35.9)                             | 7858 (32.6)          |         |
| Never                                               | 137 (61.7)                       | 341 (61.2)                             | 15380 (63.8)         |         |
| Missing                                             | 3 (1.4)                          | 5 (0.9)                                | 221 (0.9)            |         |

264 \* There were no missing values for the variables sex and age. BMI, body mass index; GC, glucocorticoids; n, number; SD, standard deviation.

1  
2  
3 265 *Volumetric imaging parameters*

4  
5 266 Fifteen out of 22 predefined ROIs for the volumetric imaging were significantly different across the  
6  
7 267 groups according to the ANOVA (Supplement 3.2). However, none of the 'global volume' parameters  
8  
9 268 reached statistical significance in the post-hoc tests (Table 2). With respect to 'subcortical volumes',  
10  
11 269 the caudate was larger in oral glucocorticoid users compared to controls (adjusted mean difference  
12  
13 270 (AMD) = 77.8 mm<sup>3</sup>, 95% confidence interval (CI) = 24.5 to 131.1). None of the subcortical volumes  
14  
15 271 (containing both grey and white matter) differed significantly between inhalation glucocorticoid  
16  
17 272 users and controls. Of the 'regional grey matter volumes', the caudate was larger in oral  
18  
19 273 glucocorticoid users compared to controls (AMD = 178.7 mm<sup>3</sup>, 95% CI = 82.2 to 275.0), and inhalation  
20  
21 274 glucocorticoid users had smaller grey matter volumes in the amygdala (AMD = -23.9 mm<sup>3</sup>, 95% CI = -  
22  
23 275 41.5 to -6.2).

24  
25 276 To assess whether chronic or repeated glucocorticoid exposure was associated with greater  
26  
27 277 changes in imaging parameters, subgroup analyses among chronic oral glucocorticoid users (n = 42)  
28  
29 278 and chronic inhalation glucocorticoid users (n = 305) were performed (demographic characteristics  
30  
31 279 are presented in Supplement 4). As expected, only few of the investigated imaging parameters  
32  
33 280 reached statistical significance due to the lower power resulting from the smaller group sizes than in  
34  
35 281 the main analysis (Supplement 3.3). Nevertheless, in chronic oral glucocorticoid users, global  
36  
37 282 volumes showed the same patterns of reduction as in the main analysis, and the caudate showed a  
38  
39 283 larger increase in subcortical volume, but a smaller increase in grey matter volume. For chronic  
40  
41 284 inhalation glucocorticoid users, the patterns were like those in the main analysis, with no striking  
42  
43 285 differences in effect sizes (Supplements 3.3, 5, and 6).  
44  
45 286  
46  
47  
48  
49  
50  
51  
52  
53  
54  
55  
56  
57  
58  
59  
60

**Table 2.** Imaging parameters, presented as the adjusted mean difference of patients using oral glucocorticoids (n = 222) or inhalation glucocorticoids (n = 557) compared to controls (n = 24106)

|                                                         | ANOVA   |         |                  | Oral GC vs. controls |              |                | Inhalation GC vs. controls |              |               |
|---------------------------------------------------------|---------|---------|------------------|----------------------|--------------|----------------|----------------------------|--------------|---------------|
|                                                         | F value | P value | P <sub>FDR</sub> | AMD*                 | 95% CI       | P value        | AMD*                       | 95% CI       | P value       |
| <b><i>Volumetric measures</i></b>                       |         |         |                  |                      |              |                |                            |              |               |
| <i>Global volumes (in mm<sup>3</sup>)</i>               |         |         |                  |                      |              |                |                            |              |               |
| Total brain volume                                      | 19.7    | 2.8e-9  | <b>1.0e-8</b>    | -3688                | -10627; 3252 | 0.39           | 3374                       | -1012; 7760  | 0.16          |
| Grey matter volume                                      | 23.7    | 5.4e-11 | <b>6.5e-10</b>   | -1968                | -5904; 1968  | 0.43           | 1012                       | -1476; 3500  | 0.57          |
| White matter volume                                     | 6.7     | 0.0012  | <b>0.0020</b>    | -1720                | -6273; 2833  | 0.61           | 2362                       | -516; 5240   | 0.13          |
| Peripheral cortex                                       | 21.1    | 6.9e-10 | <b>6.2e-9</b>    | -3303                | -6843; 237   | 0.072          | 1033                       | -1205; 3270  | 0.49          |
| CSF volume                                              | 10.1    | 4.2e-5  | <b>9.5e-5</b>    | 1215                 | -824; 3254   | 0.32           | 78                         | -1211; 1367  | 0.98          |
| <i>Subcortical volumes (in mm<sup>3</sup>)</i>          |         |         |                  |                      |              |                |                            |              |               |
| Accumbens                                               | 12.0    | 6.0e-6  | <b>1.7e-5</b>    | -13.1                | -26.7; 0.5   | 0.062          | -6.5                       | -15.1; 2.1   | 0.17          |
| Caudate                                                 | 6.7     | 0.00126 | <b>0.0020</b>    | 77.8                 | 24.5; 131.1  | <b>0.0023</b>  | -2.7                       | -36.4; 30.9  | 0.97          |
| Pallidum                                                | 7.7     | 4.5e-4  | <b>7.8e-4</b>    | 0.8                  | -29.9; 31.4  | 1.00           | -18.0                      | -37.3; 1.42  | 0.074         |
| Putamen                                                 | 10.9    | 1.8e-5  | <b>4.6e-5</b>    | -31.3                | -98.2; 35.6  | 0.48           | -27.9                      | -70.2; 14.4  | 0.25          |
| Thalamus                                                | 8.2     | 2.7e-4  | <b>4.9e-4</b>    | 3.6                  | -74.0; 81.1  | 0.99           | -6.4                       | -55.4; 42.6  | 0.93          |
| <i>Regional grey matter volumes (in mm<sup>3</sup>)</i> |         |         |                  |                      |              |                |                            |              |               |
| Amygdala                                                | 23.8    | 5.0e-11 | <b>6.5e-10</b>   | -4.0                 | -31.9; 23.8  | 0.91           | -23.9                      | -41.5; -6.2  | <b>0.0052</b> |
| Caudate                                                 | 13.0    | 2.3e-6  | <b>7.5e-6</b>    | 178.7                | 82.2; 275.0  | <b>0.00010</b> | 41.2                       | -19.8; 102.0 | 0.24          |
| Cerebellum                                              | 10.8    | 2.0e-5  | <b>4.8e-5</b>    | 25.1                 | -18.4; 68.5  | 0.34           | -12.2                      | -39.7; 15.3  | 0.51          |
| Insular cortex                                          | 8.5     | 2.0e-4  | <b>3.9e-4</b>    | -36.2                | -108.4; 36.0 | 0.43           | 5.0                        | -40.6; 50.7  | 0.95          |



|                              |      |         |                |         |                  |               |         |                  |                   |
|------------------------------|------|---------|----------------|---------|------------------|---------------|---------|------------------|-------------------|
| Precuneal cortex             | 5.5  | 0.0043  | <b>0.0056</b>  | -21.5   | -179.0; 136.3    | 0.92          | -7.4    | -107.0; 92.4     | 0.97              |
| <b>DTI measures</b>          |      |         |                |         |                  |               |         |                  |                   |
| <i>Fractional anisotropy</i> |      |         |                |         |                  |               |         |                  |                   |
| Global                       | 19.2 | 4.6e-9  | <b>2.8e-8</b>  | -0.0037 | -0.0064; -0.0010 | <b>0.0042</b> | -0.0023 | -0.0040; -5.7e-4 | <b>0.0057</b>     |
| Body of corpus callosum      | 10.0 | 4.7e-5  | <b>1.0e-4</b>  | -0.0043 | -0.0084; -1.2e-4 | <b>0.043</b>  | -0.0023 | -0.0049; 3.0e-4  | 0.092             |
| Genu of corpus callosum      | 16.8 | 5.4e-8  | <b>2.1e-7</b>  | -0.0064 | -0.011; -0.0017  | <b>0.0050</b> | -0.0019 | -0.0049; 0.0011  | 0.27              |
| Splenium of corpus callosum  | 5.4  | 0.0044  | <b>0.0056</b>  | -0.0021 | -0.0053; 0.0012  | 0.27          | -0.0032 | -0.0052; -0.0012 | <b>0.0010</b>     |
| Cingulum cingulate           | 6.1  | 0.0024  | <b>0.0034</b>  | -0.0017 | -0.0062; 0.0028  | 0.61          | -0.0028 | -0.0057; 8.9e-6  | 0.051             |
| Cingulum hippocampus         | 6.4  | 0.0017  | <b>0.0025</b>  | 6.5e-5  | -0.0046; 0.0048  | 1.00          | -3.4e-3 | -0.0063; -3.8e-4 | <b>0.024</b>      |
| <i>Mean diffusivity</i>      |      |         |                |         |                  |               |         |                  |                   |
| Global                       | 25.9 | 5.8e-12 | <b>2.1e-10</b> | 7.2e-6  | 3.2e-6; 1.1e-5   | <b>0.0001</b> | 2.7e-6  | 1.7e-7; 5.2e-6   | <b>0.034</b>      |
| Body of corpus callosum      | 15.5 | 2.0e-7  | <b>7.0e-7</b>  | 6.9e-6  | 1.7e-6; 1.2e-5   | <b>0.0060</b> | 4.8e-6  | 1.6e-6; 8.1e-6   | <b>0.0020</b>     |
| Genu of corpus callosum      | 18.0 | 1.6e-8  | <b>7.0e-8</b>  | 8.4e-6  | 2.2e-6; 1.5e-5   | <b>0.0049</b> | 4.1e-6  | 1.7e-7; 8.0e-6   | <b>0.039</b>      |
| Splenium of corpus callosum  | 9.7  | 6.2e-5  | <b>1.2e-4</b>  | 4.4e-6  | -3.8e-8; 8.9e-6  | 0.050         | 5.3e-6  | 2.4e-6; 8.1e-6   | <b>0.00010</b>    |
| Cingulum cingulate           | 5.4  | 0.0043  | <b>0.0056</b>  | 2.9e-6  | -8.5e-7; 6.6e-6  | 0.16          | 2.8e-6  | 4.7e-7; 5.2e-6   | <b>0.015</b>      |
| Cingulum hippocampus         | 18.5 | 9.1e-9  | <b>4.7e-8</b>  | 5.0e-6  | 4.2e-7; 9.5e-6   | <b>0.029</b>  | 5.6e-6  | 2.8e-6; 8.5e-6   | <b>&lt;.00010</b> |
| Uncinate fasciculus          | 12.1 | 5.4e-6  | <b>1.6e-5</b>  | 6.4e-6  | 2.2e-6; 1.1e-5   | <b>0.0014</b> | 2.2e-6  | -4.4e-7; 4.9e-6  | 0.12              |

291

292 \* Adjusted mean difference, calculated using linear models, adjusted for age, sex, education, X-, Y-, and Z-position of the head in the scanner, head size,  
 293 assessment centre, and year of imaging acquisition.

294 CI, confidence interval;  $P_{FDR}$ , Benjamini-Hochberg false discovery rate corrected P values. P values in bold are statistically significant ( $P < 0.05$ ).

295

### 296 *Diffusion imaging parameters*

297 All but one of the diffusion imaging parameters differed significantly across the groups. Post-hoc  
298 tests showed that global FA was reduced in oral glucocorticoid users (AMD =  $-3.7e-3$ , 95% CI =  $-6.4e-3$   
299 to  $1.0e-3$ ), and reductions in regional FA were observed in the body and genu of the corpus callosum  
300 (Table 2, Figure 2). Similarly, global FA was reduced in inhalation glucocorticoid users (AMD =  $-2.3e-3$ ,  
301 95% CI =  $-4.0e-3$  to  $-5.7e-4$ ), and the splenium of the corpus callosum and the cingulum of the  
302 hippocampus also showed a lower FA. For most ROIs, reductions in FA were smaller in inhalation  
303 glucocorticoid users than in oral glucocorticoid users.

304 Furthermore, global MD was higher in oral glucocorticoid users (AMD =  $7.2e-6$ , 95% CI =  $3.2e-6$   
305 to  $1.1e-5$ ) and inhalation glucocorticoid users compared to controls (AMD =  $2.7e-6$ , 95% CI =  $1.7e-7$   
306 to  $5.2e-6$ ). In oral glucocorticoid users, increases in regional MD were observed in the body and genu  
307 of the corpus callosum, the cingulum of the hippocampus, and the uncinate gyrus. For inhalation  
308 glucocorticoid users, the increase in MD was significant in the body, genu, and splenium of the  
309 corpus callosum, the cingulum of the cingulate cortex, and the cingulum of the hippocampus. Again,  
310 effect sizes were similar or smaller for most tracts compared to the effects observed in oral  
311 glucocorticoid users.

312 For chronic glucocorticoid users, the tendencies of FA and MD outcomes were in the same  
313 direction as the main analysis for all ROIs. Almost all associations with global and regional FA and MD  
314 showed a greater effect size among chronic oral glucocorticoid users than in the main analysis,  
315 although only the global FA and MD measures, and FA and MD in the genu of the corpus callosum  
316 reached significance. In chronic inhalation glucocorticoid users, however, the effect sizes were not  
317 remarkably different from those observed in the main analysis (Supplements 3.3, 5, and 6).

### 319 *Cognitive and emotional outcomes*

320 ANOVA showed differences between the groups on three cognitive tasks: trail making A, trail making  
321 B, and symbol substitution (Supplement 3.4). Post-hoc testing revealed that oral glucocorticoid users  
322 performed significantly worse on the symbol digit substitution task compared to controls (AMD = -  
323  $0.17$  SD, 95% CI =  $-0.34$  to  $-0.01$ ; Table 3). With regards to the emotional outcomes, between-group  
324 differences were observed in the frequency of depressive symptoms ( $P = 0.0049$ ), disinterest ( $P =$   
325  $0.0049$ ), tenseness/restlessness ( $P = 0.0025$ ) and tiredness/lethargy ( $P = 3.7e-7$ ) (Supplements 3.5  
326 and 7). Pairwise comparisons using logistic regression analysis revealed that oral glucocorticoid users  
327 experienced more depressive symptoms (OR = 1.76, 95% CI = 1.25 to 2.43), disinterest (OR = 1.84,  
328 95% CI = 1.29 to 2.56), tenseness/restlessness (OR = 1.78, 95% CI = 1.29 to 2.41), and  
329 tiredness/lethargy (OR = 1.90, 95% CI = 1.45 to 2.50) compared to controls (Table 4), while inhalation

1  
2  
3 330 glucocorticoid users only reported more tiredness/lethargy than controls (OR = 1.35, 95% CI = 1.14 to  
4  
5 331 1.60).

6 332 For the chronic users, none of the cognitive outcomes was significantly different in oral or  
7  
8 333 inhalation glucocorticoid users compared to controls in the post-hoc analysis. Effect sizes for chronic  
9  
10 334 oral glucocorticoid users were even smaller than in the entire cohort, while two out of three were  
11 335 slightly larger in the chronic inhalation glucocorticoid users compared to the entire cohort  
12  
13 336 (Supplement 3.6, Supplement 7). Likewise, the emotional outcome parameters did not differ  
14  
15 337 significantly, except for tiredness/lethargy which was more common in inhalation glucocorticoid  
16 338 users compared to controls. Remarkably, most odds ratios were lower than in the main analysis  
17  
18 339 (Supplements 3.7, 8, and 9).

19 340  
20  
21 341  
22  
23 342  
24  
25 343  
26  
27  
28  
29  
30  
31  
32  
33  
34  
35  
36  
37  
38  
39  
40  
41  
42  
43  
44  
45  
46  
47  
48  
49  
50  
51  
52  
53  
54  
55  
56  
57  
58  
59  
60

344 **Table 3.** Cognitive outcome measures of patients using oral glucocorticoids (n = 222) or inhalation glucocorticoids (n = 557) compared to controls

345

|                            | ANOVA   |         |                  | Oral GC vs. controls |              | Inhalation GC vs. controls |         |             |         | Participants with available data, n (%) |               |            |
|----------------------------|---------|---------|------------------|----------------------|--------------|----------------------------|---------|-------------|---------|-----------------------------------------|---------------|------------|
|                            | F value | P value | P <sub>FDR</sub> | AMD*                 | 95% CI       | P value                    | AMD*    | 95% CI      | P value | Oral GC                                 | Inhalation GC | Controls   |
| <b>Trail making A</b>      | 5.6     | 0.0036  | <b>0.0073</b>    | -0.11                | -0.28; 0.06  | 0.25                       | -0.031  | -0.15; 0.09 | 0.78    | 149 (67)                                | 296 (53)      | 16419 (68) |
| <b>Trail making B</b>      | 6.1     | 0.0023  | <b>0.0068</b>    | -0.12                | -0.30; 0.05  | 0.19                       | -0.0077 | -0.13; 0.11 | 0.98    | 139 (63)                                | 291 (52)      | 16071 (67) |
| <b>Symbol substitution</b> | 10.3    | 3.5e-5  | <b>2.1e-4</b>    | -0.17                | -0.34; -0.01 | <b>0.038</b>               | -0.035  | -0.15; 0.08 | 0.72    | 146 (66)                                | 298 (54)      | 16442 (68) |

346

347 \* Adjusted mean difference between patients and controls, expressed in Z scores. Calculated using linear models, adjusting for age, sex, and education.

348 Trail making A, and trail making B were log transformed before generation of Z scores because they were non-normally distributed. Variables were

349 transformed such that higher values indicate a better performance.

350 CI, confidence interval; GC, glucocorticoids; n, number; P<sub>FDR</sub>, Benjamini-Hochberg false discovery rate corrected P values.

351 P values in bold are statistically significant (P < 0.05).

352

353 **Table 4.** Likelihood of experiencing mental health complaints in the past two weeks of oral  
 354 glucocorticoid users (n = 222) and inhalation glucocorticoid users (n = 557) compared to controls  
 355

|                    | Likelihood ratio test |         |                  | Oral GC vs. controls |            |               | Inhalation GC vs. controls |            |               |
|--------------------|-----------------------|---------|------------------|----------------------|------------|---------------|----------------------------|------------|---------------|
|                    | X <sup>2</sup>        | P value | P <sub>FDR</sub> | OR                   | 95% CI     | P value       | OR                         | 95% CI     | P value       |
| <b>Depression</b>  | 10.6                  | 0.0049  | 0.0049           | 1.76                 | 1.25; 2.43 | <b>8.2e-4</b> | 1.10                       | 0.87; 1.38 | 0.43          |
| <b>Disinterest</b> | 10.9                  | 0.0043  | 0.0049           | 1.84                 | 1.29; 2.56 | <b>5.1e-4</b> | 1.06                       | 0.82; 1.36 | 0.64          |
| <b>Tenseness</b>   | 13.4                  | 0.0012  | 0.0025           | 1.78                 | 1.29; 2.41 | <b>3.0e-4</b> | 1.16                       | 0.92; 1.43 | 0.19          |
| <b>Tiredness</b>   | 32.4                  | 9.2e-8  | 3.7e-7           | 1.90                 | 1.45; 2.50 | <b>4.4e-6</b> | 1.35                       | 1.14; 1.60 | <b>6.3e-4</b> |

356

357 Calculated using logistic regression analysis, adjusting for age, sex, and education.

358 P values in bold are statistically significant after Bonferroni correction for family-wise error rate of  
 359 two tests (P < 0.025).

360 CI, confidence interval; GC, glucocorticoids; OR, odds ratio; P<sub>FDR</sub>, Benjamini-Hochberg false discovery  
 361 rate corrected P values.

362

363

1  
2  
3 364 *Sensitivity analyses*

4  
5 365 In the first sensitivity analysis we included the subjects that were previously excluded based on  
6 366 neurological, psychiatric, or endocrine history or medication use. The imaging outcomes were  
7  
8 367 comparable to those of the main analysis, with similar ROIs being significantly different between the  
9  
10 368 groups (Supplements 3.8 to 3.10, and Supplements 10 to 14), although the differences in diffusion  
11 369 parameters of between glucocorticoid users and controls were more pronounced in the main  
12  
13 370 analysis than in the unselected group. The same was observed for the cognitive and emotional  
14  
15 371 outcomes.

16 372 For the second sensitivity analysis, outliers of the imaging and cognitive outcomes (<3% for  
17 373 most parameters) were excluded (Supplements 3.11 to 3.14, and Supplements 15 and 16), which led  
18 374 to the same conclusions for the imaging outcomes, except for a small number of regions that had  
19 375 shown a tendency in the main analysis and reached significance after exclusion of outlier values  
20 376 (subcortical accumbens volume, insular grey matter volume, and MD in the splenium of the corpus  
21 377 callosum; all in oral glucocorticoid users). For the cognitive outcomes, exclusion of outliers resulted  
22 378 in not only a significant reduced score on the symbol digit substitution test, but also on the trail  
23 379 making B test for the oral glucocorticoid users.

30 380

31 381 *Mediation analyses*

32  
33 382 To assess whether total body fat percentage could have mediated the effect of glucocorticoids on  
34 383 the brain, mediation analysis was performed. For none of the investigated imaging outcomes, a  
35 384 significant mediation effect by body fat percentage was found (Supplement 3.15), suggesting that the  
36 385 observed effects of glucocorticoids were independent of body fat.

40 386

## 387 Discussion

388 This study shows that in the large population-based cohort of the UK Biobank, the use of not only  
389 oral glucocorticoids but also inhalation glucocorticoids is associated with changes in several brain  
390 imaging parameters. Most notably, the previously reported glucocorticoid effects on white matter  
391 microstructure<sup>32</sup> were also detected in this population and are therefore likely to be widespread  
392 amongst glucocorticoid users. Subgroup analyses among people using chronic glucocorticoids  
393 suggested a potential dose- or duration-dependent effect of glucocorticoids on white matter  
394 microstructure, with smallest effect sizes in inhalation glucocorticoid users, larger effect sizes in oral  
395 glucocorticoid users, and the largest effect sizes in chronic oral glucocorticoid users. While it remains  
396 unclear whether the observed effect sizes have clinical consequences for the population of  
397 glucocorticoid users as a whole, these findings are remarkable given the common neuropsychiatric  
398 side effects of synthetic glucocorticoids, and the observed changes may play a role in those patients  
399 suffering from these side effects.

400

### 401 *Findings in context*

402 Previous studies in people exposed to high levels of endogenous glucocorticoid due to Cushing  
403 disease or high-dose synthetic oral glucocorticoids have shown that glucocorticoid overexposure is  
404 associated with global cerebral atrophy and cortical thinning, as well as volumetric changes in  
405 specific brain areas. For example, reductions of grey matter volume have been observed in the  
406 hippocampus<sup>14, 24, 25, 27, 30, 31, 53</sup>, amygdala<sup>18, 28, 54</sup>, cingulate cortex<sup>13, 22, 23</sup>, insula<sup>13</sup>, caudate<sup>19</sup>, and  
407 cerebellum<sup>17, 25, 26</sup>, which have all been implicated in cognitive processes and emotional regulation<sup>55-</sup>  
408<sup>60</sup>. However, not all findings were consistent across studies, which may in part be due to differences  
409 between patient populations (e.g., with respect to duration and type of glucocorticoid exposure), the  
410 small sample sizes of the studies, and the different analysis methods used, with some studies only  
411 focussing on one specific brain region, and others performing whole-brain analysis. In general,  
412 studies have mainly been dedicated to structural imaging with a specific interest in grey matter  
413 volume, while diffusion imaging has only been performed by only a few studies in patients with  
414 Cushing disease<sup>32-35</sup>.

415 The present study extends these findings by investigating brain volumes and white matter  
416 microstructure in not only systemic (oral) glucocorticoid users, but also inhalation glucocorticoid  
417 users, in whom neuropsychiatric side effects have been reported too<sup>61</sup>. The most remarkable and  
418 consistent effects were observed in white matter integrity, which was decreased in both oral and  
419 inhalation glucocorticoid users. Although these reductions were only about 10% of the effect sizes  
420 previously found in Cushing patients<sup>32</sup>, this adds to the growing body of literature suggesting that  
421 glucocorticoids have important impact on white matter, and that non-neuronal cells such as

1  
2  
3 422 oligodendrocytes are very sensitive to glucocorticoids. Animal studies have shown that glucocorticoid  
4 423 exposure inhibits proliferation of oligodendrocyte progenitor cells throughout the white matter <sup>62</sup>,  
5 424 and induce changes in the expression of myelin basic protein (MBP), an oligodendrocyte marker <sup>36, 63</sup>.  
6  
7 425 Since oligodendrocytes are responsible for myelin production, glucocorticoid-induced changes in  
8  
9 426 oligodendrocytes may underly the reduced white matter microstructure observed in patients using  
10  
11 427 glucocorticoids. Besides oligodendrocytes, other glia cells including microglia and astrocytes are also  
12  
13 428 affected by glucocorticoids, with multiple reports of decreased cell viability, proliferation, and  
14  
15 429 immunoreactivity of microglia and astrocytes in response to glucocorticoids <sup>64-67</sup>.

16 430 Although we observed some patterns in global and regional brain volumes in glucocorticoid  
17  
18 431 users, most of these did not reach significance. Rather surprisingly, although none of the global  
19  
20 432 volumes was significantly different between patients and controls, the direction of change for all the  
21  
22 433 areas was different for oral (decreased volumes) vs. inhalation glucocorticoid users (increased  
23  
24 434 volumes). We did observe a significant reduction in grey matter volume of the amygdala in inhalation  
25  
26 435 glucocorticoid users, and an increase in total and grey matter volume of the caudate nucleus in oral  
27  
28 436 glucocorticoid users. Decreased amygdala volumes have previously been reported in chronic oral  
29  
30 437 glucocorticoid users <sup>18, 28, 54</sup>. However, the increase in caudate volume contrasts with two previous  
31  
32 438 studies that found larger caudate volumes after treatment of Cushing disease compared to during  
33  
34 439 active disease <sup>19, 20</sup>, while one other study reported an increased caudate volume in remitted patients  
35  
36 440 compared to controls, but no differences in patients with active Cushing disease compared to  
37  
38 441 controls <sup>21</sup>. Those findings suggest that cortisol excess caused a decreased caudate volume in these  
39  
40 442 patients and/or that the caudate volume increased in response to normalization of cortisol levels.  
41  
42 443 The modest effects of glucocorticoids on brain volumes in the present population-based cohort study  
43  
44 444 could indicate that white matter integrity is more sensitive to glucocorticoids than grey matter  
45  
46 445 volume, and that longer or higher glucocorticoid exposure is needed to also induce volumetric  
47  
48 446 changes.

49 447

#### 448 *Potential consequences and implications*

49 449 It is well-known that exogenous glucocorticoids are associated with neuropsychiatric side effects,  
50  
51 450 including not only potentially severe mood disturbances such as depression and mania, but also  
52  
53 451 cognitive impairment such as concentration and memory problems <sup>10</sup>. In the present study,  
54  
55 452 glucocorticoid users reported a higher frequency of several mental health complaints, while their  
56  
57 453 cognitive performance was not significantly different, except for worse scores on the symbol digit  
58  
59 454 substitution task in oral glucocorticoid users. It should be noted that only a few mood-related  
60  
455 parameters assessed by the UK Biobank were selected for this study, because these were the only  
456  
456 parameters that applied specifically to the previous two weeks, in which the glucocorticoid users



1  
2  
3 457 were likely already using their medication. Ideally, more aspects of mood would have been assessed  
4  
5 458 to get a more comprehensive view on the glucocorticoid users' psychological functioning.  
6  
7 459 Furthermore, the observed mood-related effects may not be caused by glucocorticoid use per se but  
8  
9 460 could also be related to the condition for which glucocorticoids were prescribed. For example,  
10  
11 461 autoimmune and inflammatory diseases commonly treated with glucocorticoids, such as rheumatoid  
12  
13 462 arthritis and chronic obstructive pulmonary disorder, have also been associated with mental health  
14  
15 463 impairment and reduced quality of life <sup>68, 69</sup>.

16  
17 464 Nevertheless, awareness for the potential of glucocorticoids to affect the brain and cause  
18  
19 465 neuropsychiatric symptoms is important, since these medications are prescribed for a wide range of  
20  
21 466 conditions by many different medical specialties and are used by a substantial proportion of the  
22  
23 467 population. Moreover, further research into the underlying mechanisms, reversibility, and risk  
24  
25 468 factors for development of neuropsychiatric side effects of glucocorticoids is warranted, ideally  
26  
27 469 considering dose and duration of glucocorticoids, as well as single nucleotide polymorphisms (SNPs)  
28  
29 470 in the glucocorticoid receptor gene (NR3C1) that affect glucocorticoid sensitivity. For those patients  
30  
31 471 experiencing side effects, alternative treatment options should also be investigated. One promising  
32  
33 472 direction is the development of selective GR modulators, since these (ideally) only activate the  
34  
35 473 desired downstream signalling pathways in the desired cell types, limiting the potential side effects  
36  
37 474 <sup>70, 71</sup>.

### 38 475 39 476 *Strengths and limitations*

40  
41 477 To the best of our knowledge, this is the largest study to date assessing the effects of glucocorticoid  
42  
43 478 use on the brain, and the first to investigate these effects in inhalation glucocorticoid users. For the  
44  
45 479 selection of patients and controls, we applied relatively strict exclusion criteria to limit the potential  
46  
47 480 confounding that may arise in observational cohort studies. Although not all neurological disorders,  
48  
49 481 especially peripheral disorders, may have a clear impact on brain volume or white matter  
50  
51 482 microstructure, UK Biobank participants with these conditions were excluded to prevent any  
52  
53 483 confounding by these comorbidities. Our sensitivity analysis suggested that these conditions did not  
54  
55 484 have a large impact on the results. However, we decided not to exclude patients with a history of  
56  
57 485 depression, anxiety, mania, or delirium, because these are known possible consequences of  
58  
59 486 glucocorticoid use <sup>10</sup>, and we did not want to exclude patients based on potentially glucocorticoid-  
60  
61 487 related outcomes.

62  
63 488 Another method used to limit confounding was adjustment of the regression analyses for  
64  
65 489 relevant confounding variables, including demographic variables and variables related to the imaging  
66  
67 490 visits (e.g., assessment centre, position of the head in the scanner). For both the volumetric and  
68  
69 491 diffusion parameters, head size was used as covariate, because previous research not only found a

1  
2  
3 492 relation between head size and brain volume, but also between head size and DTI parameters <sup>72, 73</sup>.  
4  
5 493 The use of this variable as covariate is also recommended by the UK Biobank <sup>45</sup>. We decided not to  
6  
7 494 include a measure of body weight or body composition as covariate, because it is known that  
8  
9 495 glucocorticoids can cause obesity <sup>7</sup>, which is therefore more likely to be in the causal pathway than to  
10  
11 496 be a confounder. Our mediation analysis, however, suggested that body fat percentage did not  
12  
13 497 mediate the effect of glucocorticoids on the brain. Nevertheless, despite the correction for a wide  
14  
15 498 range of potential confounders, it should be noted that the possibility of residual confounding cannot  
16  
17 499 be excluded.

18 500 In addition, although a causal relation between glucocorticoid use and changes in the brain is  
19  
20 501 likely based on the present and previous studies, the cross-sectional nature of this study officially  
21  
22 502 does not allow for conclusions on causality. Demonstrating a dose-response effect of glucocorticoid  
23  
24 503 on imaging parameters would have increased the likelihood of a causal relation, but unfortunately,  
25  
26 504 dose and duration of medication use were not available in the UK Biobank. We were therefore only  
27  
28 505 able to give an indication of a dose-response effect by performing separate analyses in oral  
29  
30 506 glucocorticoid users, inhalation glucocorticoid users (representing a group exposed to lower systemic  
31  
32 507 concentration of glucocorticoids), and subgroups of patients using oral or inhalation glucocorticoid  
33  
34 508 chronically (representing groups with a longer duration of glucocorticoid use). The fact that the  
35  
36 509 effect sizes of the associations between glucocorticoid use and diffusion imaging parameters are  
37  
38 510 generally largest in the chronic oral glucocorticoid group, and smallest in the inhalation  
39  
40 511 glucocorticoid group, indicates that a dose- or duration-dependent effect may exist, although the  
41  
42 512 limited power of the small chronic oral glucocorticoid group precluded most associations from  
43  
44 513 reaching significance. Moreover, while effect estimates were larger in chronic oral glucocorticoid  
45  
46 514 users compared to the main group using oral glucocorticoids, this difference was not observed  
47  
48 515 among inhalation glucocorticoid users. A potential explanation may be that inhalation  
49  
50 516 glucocorticoids are generally prescribed for a longer duration than oral glucocorticoids, which is also  
51  
52 517 reflected by the high percentage of inhalation glucocorticoid users (326/592, 55%) that could be  
53  
54 518 included in the subgroup of chronic users, compared to the lower percentage of chronic oral  
55  
56 519 glucocorticoid users (48/234, 21%).

50 520

## 51 521 *Conclusion*

52 522 This study shows that both oral and inhalation glucocorticoids are associated with decreased white  
53  
54 523 matter integrity, which may in part underly the neuropsychiatric side effects observed in patients  
55  
56 524 using glucocorticoids. Since these medications are widely used, awareness of these effects is  
57  
58 525 necessary across medical specialties, and research into alternative treatment options is warranted.

59 526

1  
2  
3 527 **Declarations**

4  
5 528  
6 529 *Author contribution statement:* JMA and OCM contributed to the study conception. MvdM designed  
7  
8 530 the study, performed the analyses, and wrote the first version of the manuscript. OMD contributed  
9  
10 531 to the statistical analyses. All authors read and commented on the manuscript and approved the final  
11  
12 532 version of the manuscript. MvdM and OCM are the guarantors of the manuscript and accept full  
13  
14 533 responsibility for the work and conduct of the study, had access to the data, and controlled the  
15  
16 534 decision to publish. The corresponding author attests that all listed authors meet authorship criteria  
17  
18 535 and that no others meeting the criteria have been omitted.

19 536  
20 537 *Acknowledgements:* We would like to thank dr. Roula Tsonaka for her advice regarding the statistical  
21  
22 538 analysis, and dr. Steven van der Werff for his suggestion for this study.

23 539  
24  
25 540 *Competing interests:* All authors have completed the ICMJE uniform disclosure form at  
26  
27 541 <http://www.icmje.org/disclosure-of-interest/> and declare: MvdM received financial support from the  
28  
29 542 MD/PhD grant of the Leiden University Medical Center, and JMA received financial support from  
30  
31 543 CONACyT (the National Council for Science and Technology-Government of Mexico) for the  
32  
33 544 submitted work; OCM has received research grants and honorariums from Corcept Therapeutics, and  
34  
35 545 a speakers' fee from Ipsen; no other relationships or activities that could appear to have influenced  
36  
37 546 the submitted work.

38 547  
39 548 *Funding:* The UK Biobank was established by the Wellcome Trust, Medical Research Council,  
40  
41 549 Department of Health, Scottish government, and Northwest Regional Development Agency. It also  
42  
43 550 received funding from the Welsh Government, the British Heart Foundation, Cancer Research UK,  
44  
45 551 and Diabetes UK. For the analyses presented in this manuscript, MvdM received a personal MD/PhD  
46  
47 552 grant of the Leiden University Medical Center, and JMA received support from CONACyT (the  
48  
49 553 National Council for Science and Technology-Government of Mexico).

50 554  
51 555 *Role of the funding source:* The funding sources had no role in the study conduct, data collection,  
52  
53 556 analyses, data interpretation, and the decision to submit the manuscript.

54 557  
55 558 *Ethics approval:* This study was performed under the ethical approval obtained by UK Biobank from  
56  
57 559 the National Health Service National Research Ethics Service (ref 11/NW/0382, 17 June 2011). Data  
58  
59 560 for the present study were obtained from the UK Biobank under application number 59004.

60 561

1  
2  
3 562 *Transparency declaration:* The manuscript's guarantors (MvdM and OCM) affirm that the manuscript  
4 563 is an honest, accurate, and transparent account of the study being reported; that no important  
5 564 aspects of the study have been omitted; and that any discrepancies from the study as planned have  
6 565 been explained.  
7  
8  
9

10 566

11 567 *Data sharing statement:* Data used for this study are available via application to the UK Biobank.  
12  
13 568

14  
15 569 *Dissemination to participants and related patient and public communities:* Results of the study will be  
16 570 disseminated via the UK Biobank website, accessible for research participants and relevant patient  
17 571 and public communities.  
18  
19

20 572

21 573 *STROBE checklist for observational studies* can be found in Supplement 17.  
22  
23 574

24 575

25 576

26  
27  
28  
29  
30  
31  
32  
33  
34  
35  
36  
37  
38  
39  
40  
41  
42  
43  
44  
45  
46  
47  
48  
49  
50  
51  
52  
53  
54  
55  
56  
57  
58  
59  
60

577 **References**

- 578 1. Laugesen K, Jørgensen JOL, Petersen I, Sørensen HT. Fifteen-year nationwide trends in  
579 systemic glucocorticoid drug use in Denmark. *Eur J Endocrinol*. 2019;181(3):267-73.
- 580 2. Fardet L, Petersen I, Nazareth I. Prevalence of long-term oral glucocorticoid prescriptions in  
581 the UK over the past 20 years. *Rheumatology (Oxford)*. 2011;50(11):1982-90.
- 582 3. Overman RA, Yeh JY, Deal CL. Prevalence of oral glucocorticoid usage in the United States: a  
583 general population perspective. *Arthritis Care Res (Hoboken)*. 2013;65(2):294-8.
- 584 4. van Staa TP, Leufkens HG, Abenhaim L, Begaud B, Zhang B, Cooper C. Use of oral  
585 corticosteroids in the United Kingdom. *Qjm*. 2000;93(2):105-11.
- 586 5. Walsh LJ, Wong CA, Pringle M, Tattersfield AE. Use of oral corticosteroids in the community  
587 and the prevention of secondary osteoporosis: a cross sectional study. *Bmj*. 1996;313(7053):344-6.
- 588 6. Rhen T, Cidlowski JA. Antiinflammatory action of glucocorticoids--new mechanisms for old  
589 drugs. *N Engl J Med*. 2005;353(16):1711-23.
- 590 7. Fardet L, Fève B. Systemic glucocorticoid therapy: a review of its metabolic and  
591 cardiovascular adverse events. *Drugs*. 2014;74(15):1731-45.
- 592 8. Chalitsios CV, Shaw DE, McKeever TM. Risk of osteoporosis and fragility fractures in asthma  
593 due to oral and inhaled corticosteroids: two population-based nested case-control studies. *Thorax*.  
594 2021;76(1):21-8.
- 595 9. Savas M, Muka T, Wester VL, van den Akker ELT, Visser JA, Braunstahl GJ, et al. Associations  
596 Between Systemic and Local Corticosteroid Use With Metabolic Syndrome and Body Mass Index. *J*  
597 *Clin Endocrinol Metab*. 2017;102(10):3765-74.
- 598 10. Judd LL, Schettler PJ, Brown ES, Wolkowitz OM, Sternberg EM, Bender BG, et al. Adverse  
599 consequences of glucocorticoid medication: psychological, cognitive, and behavioral effects. *Am J*  
600 *Psychiatry*. 2014;171(10):1045-51.
- 601 11. Fardet L, Petersen I, Nazareth I. Suicidal behavior and severe neuropsychiatric disorders  
602 following glucocorticoid therapy in primary care. *Am J Psychiatry*. 2012;169(5):491-7.
- 603 12. Bourdeau I, Bard C, Noël B, Leclerc I, Cordeau MP, Bélair M, et al. Loss of brain volume in  
604 endogenous Cushing's syndrome and its reversibility after correction of hypercortisolism. *J Clin*  
605 *Endocrinol Metab*. 2002;87(5):1949-54.
- 606 13. Hou B, Gao L, Shi L, Luo Y, Guo X, Young GS, et al. Reversibility of impaired brain structures  
607 after transsphenoidal surgery in Cushing's disease: a longitudinal study based on an artificial  
608 intelligence-assisted tool. *J Neurosurg*. 2020:1-10.
- 609 14. Chen Y, Zhang J, Tan H, Li J, Yu Y. Detrimental effects of hypercortisolism on brain structure  
610 and related risk factors. *Sci Rep*. 2020;10(1):12708.
- 611 15. Santos A, Resmini E, Gómez-Ansón B, Crespo I, Granell E, Valassi E, et al. Cardiovascular risk  
612 and white matter lesions after endocrine control of Cushing's syndrome. *Eur J Endocrinol*.  
613 2015;173(6):765-75.
- 614 16. Simmons NE, Do HM, Lipper MH, Laws ER, Jr. Cerebral atrophy in Cushing's disease. *Surg*  
615 *Neurol*. 2000;53(1):72-6.
- 616 17. Momose KJ, Kjellberg RN, Kliman B. High incidence of cortical atrophy of the cerebral and  
617 cerebellar hemispheres in Cushing's disease. *Radiology*. 1971;99(2):341-8.
- 618 18. Merke DP, Giedd JN, Keil MF, Mehlinger SL, Wiggs EA, Holzer S, et al. Children experience  
619 cognitive decline despite reversal of brain atrophy one year after resolution of Cushing syndrome. *J*  
620 *Clin Endocrinol Metab*. 2005;90(5):2531-6.
- 621 19. Starkman MN, Giordani B, Gebarski SS, Berent S, Schork MA, Schteingart DE. Decrease in  
622 cortisol reverses human hippocampal atrophy following treatment of Cushing's disease. *Biol*  
623 *Psychiatry*. 1999;46(12):1595-602.
- 624 20. Starkman MN, Giordani B, Gebarski SS, Schteingart DE. Improvement in learning associated  
625 with increase in hippocampal formation volume. *Biol Psychiatry*. 2003;53(3):233-8.

- 1  
2  
3 626 21. Jiang H, Ren J, He NY, Liu C, Sun YH, Jian FF, et al. Volumetric magnetic resonance imaging  
4 627 analysis in patients with short-term remission of Cushing's disease. *Clin Endocrinol (Oxf)*.  
5 628 2017;87(4):367-74.  
6 629 22. Bauduin S, van der Pal Z, Pereira AM, Meijer OC, Giltay EJ, van der Wee NJA, et al. Cortical  
7 630 thickness abnormalities in long-term remitted Cushing's disease. *Transl Psychiatry*. 2020;10(1):293.  
8 631 23. Andela CD, van der Werff SJ, Pannekoek JN, van den Berg SM, Meijer OC, van Buchem MA, et  
9 632 al. Smaller grey matter volumes in the anterior cingulate cortex and greater cerebellar volumes in  
10 633 patients with long-term remission of Cushing's disease: a case-control study. *Eur J Endocrinol*.  
11 634 2013;169(6):811-9.  
12 635 24. Toffanin T, Nifosì F, Follador H, Passamani A, Zonta F, Ferri G, et al. Volumetric MRI analysis  
13 636 of hippocampal subregions in Cushing's disease: a model for glucocorticoid neural modulation. *Eur*  
14 637 *Psychiatry*. 2011;26(1):64-7.  
15 638 25. Burkhardt T, Lüdecke D, Spies L, Wittmann L, Westphal M, Flitsch J. Hippocampal and  
16 639 cerebellar atrophy in patients with Cushing's disease. *Neurosurg Focus*. 2015;39(5):E5.  
17 640 26. Santos A, Resmini E, Crespo I, Pires P, Vives-Gilabert Y, Granell E, et al. Small cerebellar cortex  
18 641 volume in patients with active Cushing's syndrome. *Eur J Endocrinol*. 2014;171(4):461-9.  
19 642 27. Brown ES, D JW, Frol A, Bobadilla L, Khan DA, Hanczyc M, et al. Hippocampal volume,  
20 643 spectroscopy, cognition, and mood in patients receiving corticosteroid therapy. *Biol Psychiatry*.  
21 644 2004;55(5):538-45.  
22 645 28. Desai S, Khanani S, Shad MU, Brown ES. Attenuation of amygdala atrophy with lamotrigine in  
23 646 patients receiving corticosteroid therapy. *J Clin Psychopharmacol*. 2009;29(3):284-7.  
24 647 29. Brown ES, Kulikova A, Van Enkevort E, Nakamura A, Ivleva EI, Tustison NJ, et al. A randomized  
25 648 trial of an NMDA receptor antagonist for reversing corticosteroid effects on the human  
26 649 hippocampus. *Neuropsychopharmacology*. 2019;44(13):2263-7.  
27 650 30. Nguyen DM, Yassa MA, Tustison NJ, Roberts JM, Kulikova A, Nakamura A, et al. The  
28 651 Relationship Between Cumulative Exogenous Corticosteroid Exposure and Volumes of Hippocampal  
29 652 Subfields and Surrounding Structures. *J Clin Psychopharmacol*. 2019;39(6):653-7.  
30 653 31. Brown ES, Jeon-Slaughter H, Lu H, Jamadar R, Issac S, Shad M, et al. Hippocampal volume in  
31 654 healthy controls given 3-day stress doses of hydrocortisone. *Neuropsychopharmacology*.  
32 655 2015;40(5):1216-21.  
33 656 32. van der Werff SJ, Andela CD, Nienke Pannekoek J, Meijer OC, van Buchem MA, Rombouts SA,  
34 657 et al. Widespread reductions of white matter integrity in patients with long-term remission of  
35 658 Cushing's disease. *Neuroimage Clin*. 2014;4:659-67.  
36 659 33. Pires P, Santos A, Vives-Gilabert Y, Webb SM, Sainz-Ruiz A, Resmini E, et al. White matter  
37 660 alterations in the brains of patients with active, remitted, and cured cushing syndrome: a DTI study.  
38 661 *AJNR Am J Neuroradiol*. 2015;36(6):1043-8.  
39 662 34. Jiang H, He NY, Sun YH, Jian FF, Bian LG, Shen JK, et al. Altered gray and white matter  
40 663 microstructure in Cushing's disease: A diffusional kurtosis imaging study. *Brain Res*. 2017;1665:80-7.  
41 664 35. Pires P, Santos A, Vives-Gilabert Y, Webb SM, Sainz-Ruiz A, Resmini E, et al. White matter  
42 665 involvement on DTI-MRI in Cushing's syndrome relates to mood disturbances and processing speed:  
43 666 a case-control study. *Pituitary*. 2017;20(3):340-8.  
44 667 36. Amaya JM, Suidgeest E, Sahut-Barnola I, Dumontet T, Montanier N, Pagès G, et al. Effects of  
45 668 Long-Term Endogenous Corticosteroid Exposure on Brain Volume and Glial Cells in the AdKO Mouse.  
46 669 *Front Neurosci*. 2021;15:604103.  
47 670 37. Sudlow C, Gallacher J, Allen N, Beral V, Burton P, Danesh J, et al. UK Biobank: an open access  
48 671 resource for identifying the causes of a wide range of complex diseases of middle and old age. *PLoS*  
49 672 *Med*. 2015;12(3):e1001779.  
50 673 38. UK Biobank. UK Biobank Body Composition Measurement Version 1.0 2011 [Available from:  
51 674 [https://biobank.ndph.ox.ac.uk/ukb/ukb/docs/body\\_composition.pdf](https://biobank.ndph.ox.ac.uk/ukb/ukb/docs/body_composition.pdf).  
52 675 39. Alfaro-Almagro F, Jenkinson M, Bangerter NK, Andersson JLR, Griffanti L, Douaud G, et al.  
53 676 Image processing and Quality Control for the first 10,000 brain imaging datasets from UK Biobank.  
54 677 *Neuroimage*. 2018;166:400-24.

- 1  
2  
3 678 40. Smith SM, Alfaro-Almagro F, Miller KL. UK Biobank Brain Imaging Documentation 2018 [cited  
4 679 2021. Available from: [biobank.ctsu.ox.ac.uk/crystal/docs/brain\\_mri.pdf](http://biobank.ctsu.ox.ac.uk/crystal/docs/brain_mri.pdf).
- 5 680 41. Zhang Y, Brady M, Smith S. Segmentation of brain MR images through a hidden Markov  
6 681 random field model and the expectation-maximization algorithm. *IEEE Trans Med Imaging*.  
7 682 2001;20(1):45-57.
- 8 683 42. Patenaude B, Smith SM, Kennedy DN, Jenkinson M. A Bayesian model of shape and  
9 684 appearance for subcortical brain segmentation. *Neuroimage*. 2011;56(3):907-22.
- 10 685 43. Smith SM, Jenkinson M, Johansen-Berg H, Rueckert D, Nichols TE, Mackay CE, et al. Tract-  
11 686 based spatial statistics: voxelwise analysis of multi-subject diffusion data. *Neuroimage*.  
12 687 2006;31(4):1487-505.
- 13 688 44. Mori S, Wakana S, Van Zijl PC, Nagae-Poetscher L. MRI atlas of human white matter: Elsevier;  
14 689 2005.
- 15 690 45. Alfaro-Almagro F, McCarthy P, Afyouni S, Andersson JLR, Bastiani M, Miller KL, et al.  
16 691 Confound modelling in UK Biobank brain imaging. *Neuroimage*. 2021;224:117002.
- 17 692 46. Dekkers IA, Jansen PR, Lamb HJ. Obesity, Brain Volume, and White Matter Microstructure at  
18 693 MRI: A Cross-sectional UK Biobank Study. *Radiology*. 2019;292(1):270.
- 19 694 47. Daley-Yates PT. Inhaled corticosteroids: potency, dose equivalence and therapeutic index. *Br*  
20 695 *J Clin Pharmacol*. 2015;80(3):372-80.
- 21 696 48. R Core Team. R: A language and environment for statistical computing. Vienna, Austria: R  
22 697 Foundation for Statistical Computing; 2020 [Available from: <https://www.R-project.org/>].
- 23 698 49. Wickham H AM, Bryan J, Chang W, McGowan LD, François R, Grolemund G, Hayes A, Henry L,  
24 699 Hester J, Kuhn M, Pedersen TL, Miller E, Bache SM, Müller K, Ooms J, Robinson D, Seidel DP, Spinu V,  
25 700 Takahashi K, Vaughan D, Wilke C, Woo K, Yutani H,. Welcome to the tidyverse. *Journal of Open*  
26 701 *Source Software*. 2019;4:1686.
- 27 702 50. Fox J, Weisberg S. An R Companion to Applied Regression. Third ed. Thousand Oaks CA: Sage;  
28 703 2019.
- 29 704 51. Zeileis A, Hothorn T. Diagnostic Checking in Regression Relationships. *R News*. 2002;2(3):7-  
30 705 10.
- 31 706 52. Tingley D, Yamamoto T, Hirose K, Keele L, Imai K. mediation: R Package for Causal Mediation  
32 707 Analysis. *Journal of Statistical Software*. 2014;59(5):1-38.
- 33 708 53. Resmini E, Santos A, Gómez-Anson B, Vives Y, Pires P, Crespo I, et al. Verbal and visual  
34 709 memory performance and hippocampal volumes, measured by 3-Tesla magnetic resonance imaging,  
35 710 in patients with Cushing's syndrome. *J Clin Endocrinol Metab*. 2012;97(2):663-71.
- 36 711 54. Brown ES, Woolston DJ, Frol AB. Amygdala volume in patients receiving chronic  
37 712 corticosteroid therapy. *Biol Psychiatry*. 2008;63(7):705-9.
- 38 713 55. Bartsch T, Wulff P. The hippocampus in aging and disease: From plasticity to vulnerability.  
39 714 *Neuroscience*. 2015;309:1-16.
- 40 715 56. Pessoa L. Emotion and cognition and the amygdala: from "what is it?" to "what's to be  
41 716 done?". *Neuropsychologia*. 2010;48(12):3416-29.
- 42 717 57. Rolls ET. The cingulate cortex and limbic systems for emotion, action, and memory. *Brain*  
43 718 *Struct Funct*. 2019;224(9):3001-18.
- 44 719 58. Gasquoine PG. Contributions of the insula to cognition and emotion. *Neuropsychol Rev*.  
45 720 2014;24(2):77-87.
- 46 721 59. Grahn JA, Parkinson JA, Owen AM. The role of the basal ganglia in learning and memory:  
47 722 neuropsychological studies. *Behav Brain Res*. 2009;199(1):53-60.
- 48 723 60. Schmahmann JD, Caplan D. Cognition, emotion and the cerebellum. *Brain*. 2006;129(2):290-  
49 724 2.
- 50 725 61. Savas M, Vinkers CH, Rosmalen JGM, Hartman CA, Wester VL, van den Akker ELT, et al.  
51 726 Systemic and Local Corticosteroid Use Is Associated with Reduced Executive Cognition, and Mood  
52 727 and Anxiety Disorders. *Neuroendocrinology*. 2020;110(3-4):282-91.
- 53  
54  
55  
56  
57  
58  
59  
60

- 1  
2  
3 728 62. Alonso G. Prolonged corticosterone treatment of adult rats inhibits the proliferation of  
4 729 oligodendrocyte progenitors present throughout white and gray matter regions of the brain. *Glia*.  
5 730 2000;31(3):219-31.
- 6 731 63. Miguel-Hidalgo JJ, Carter K, Deloach PH, Sanders L, Pang Y. Glucocorticoid-Induced  
7 732 Reductions of Myelination and Connexin 43 in Mixed Central Nervous System Cell Cultures Are  
8 733 Prevented by Mifepristone. *Neuroscience*. 2019;411:255-69.
- 9 734 64. Unemura K, Kume T, Kondo M, Maeda Y, Izumi Y, Akaike A. Glucocorticoids decrease  
10 735 astrocyte numbers by reducing glucocorticoid receptor expression in vitro and in vivo. *J Pharmacol*  
11 736 *Sci*. 2012;119(1):30-9.
- 12 737 65. Zhang H, Zhao Y, Wang Z. Chronic corticosterone exposure reduces hippocampal astrocyte  
13 738 structural plasticity and induces hippocampal atrophy in mice. *Neurosci Lett*. 2015;592:76-81.
- 14 739 66. van Olst L, Bielefeld P, Fitzsimons CP, de Vries HE, Schouten M. Glucocorticoid-mediated  
15 740 modulation of morphological changes associated with aging in microglia. *Aging Cell*.  
16 741 2018;17(4):e12790.
- 17 742 67. Freitas AE, Egea J, Buendia I, Gómez-Rangel V, Parada E, Navarro E, et al. Agmatine, by  
18 743 Improving Neuroplasticity Markers and Inducing Nrf2, Prevents Corticosterone-Induced Depressive-  
19 744 Like Behavior in Mice. *Mol Neurobiol*. 2016;53(5):3030-45.
- 20 745 68. Machin AR, Babatunde O, Haththotuwa R, Scott I, Blagojevic-Bucknall M, Corp N, et al. The  
21 746 association between anxiety and disease activity and quality of life in rheumatoid arthritis: a  
22 747 systematic review and meta-analysis. *Clin Rheumatol*. 2020;39(5):1471-82.
- 23 748 69. Pelgrim CE, Peterson JD, Gosker HR, Schols A, van Helvoort A, Garssen J, et al. Psychological  
24 749 co-morbidities in COPD: Targeting systemic inflammation, a benefit for both? *Eur J Pharmacol*.  
25 750 2019;842:99-110.
- 26 751 70. Meijer OC, Koorneef LL, Kroon J. Glucocorticoid receptor modulators. *Ann Endocrinol (Paris)*.  
27 752 2018;79(3):107-11.
- 28 753 71. Van Moortel L, Gevaert K, De Bosscher K. Improved Glucocorticoid Receptor Ligands:  
29 754 Fantastic Beasts, but How to Find Them? *Front Endocrinol (Lausanne)*. 2020;11:559673.
- 30 755 72. Takao H, Hayashi N, Inano S, Ohtomo K. Effect of head size on diffusion tensor imaging.  
31 756 *Neuroimage*. 2011;57(3):958-67.
- 32 757 73. Takao H, Hayashi N, Ohtomo K. Sex dimorphism in the white matter: fractional anisotropy  
33 758 and brain size. *J Magn Reson Imaging*. 2014;39(4):917-23.
- 34  
35  
36  
37  
38 759



1  
2  
3 **Tables and figures**  
4  
5

6 **Figure 1.** Flowchart of participant inclusion  
7

8  
9  
10 DWI, diffusion-weighted imaging; GC, glucocorticoids; n, number; T1, T1-weighted magnetic  
11 resonance imaging (MRI).  
12  
13  
14  
15  
16  
17  
18  
19  
20  
21  
22  
23  
24  
25  
26  
27  
28  
29  
30  
31  
32  
33  
34  
35  
36  
37  
38  
39  
40  
41  
42  
43  
44  
45  
46  
47  
48  
49  
50  
51  
52  
53  
54  
55  
56  
57  
58  
59  
60

For peer review only

1  
2  
3 **Figure 2.** Bar plots showing the adjusted mean difference (with 95% confidence interval) of all  
4 imaging parameters for patients using oral glucocorticoids (GC) (n = 222) or inhalation GC (n = 557),  
5 and subgroups of chronic oral GC users (n = 42), or chronic inhalation GC users (n = 305) vs. controls  
6 (n = 24106). Volumes are in mm<sup>3</sup>.  
7  
8  
9  
10  
11  
12  
13  
14  
15  
16  
17  
18  
19  
20  
21  
22  
23  
24  
25  
26  
27  
28  
29  
30  
31  
32  
33  
34  
35  
36  
37  
38  
39  
40  
41  
42  
43  
44  
45  
46  
47  
48  
49  
50  
51  
52  
53  
54  
55  
56  
57  
58  
59  
60

For peer review only

1  
2  
3  
4  
5  
6  
7  
8  
9  
10  
11  
12  
13  
14  
15  
16  
17  
18  
19  
20  
21  
22  
23  
24  
25  
26  
27  
28  
29  
30

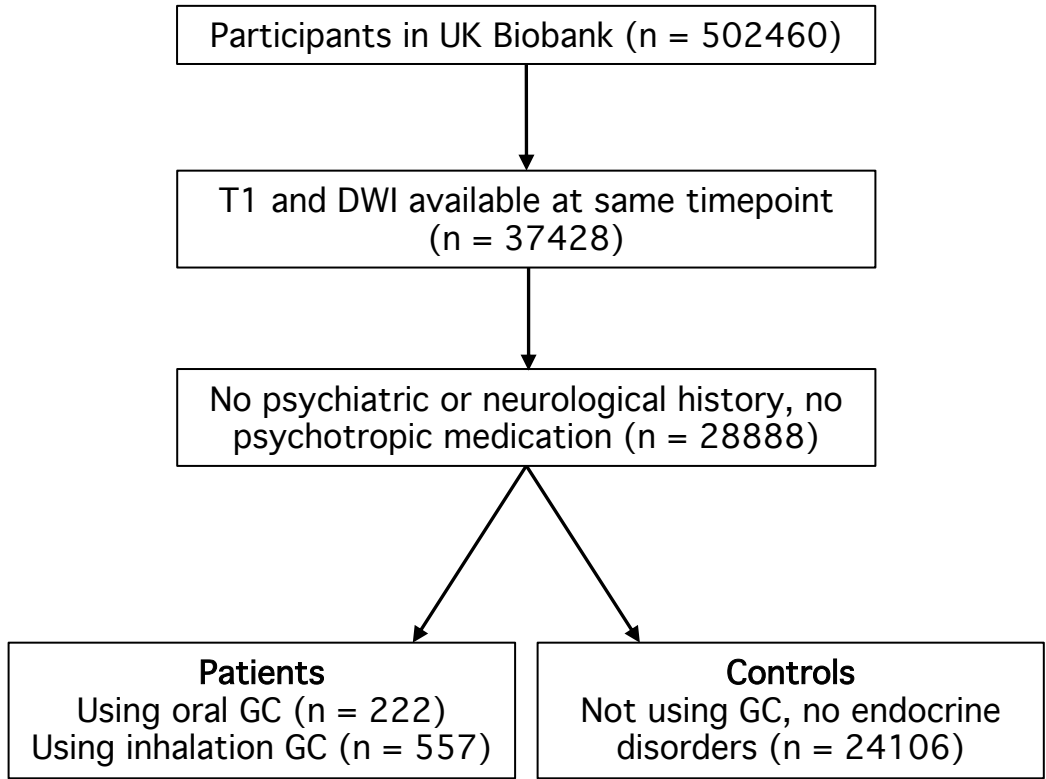

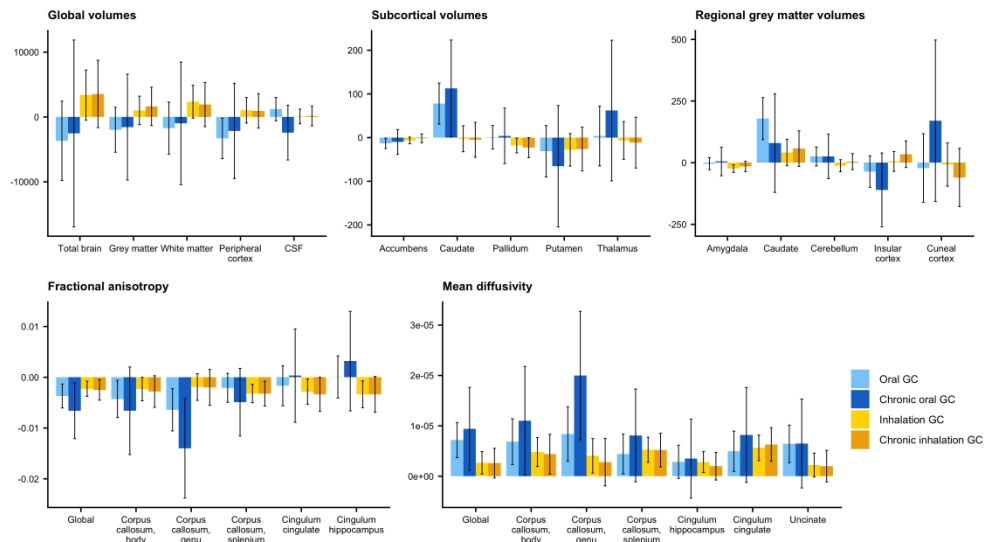

Bar plots showing the adjusted mean difference (with 95% confidence interval) of all imaging parameters for patients using oral glucocorticoids (GC) (n = 222) or inhalation GC (n = 557), and subgroups of chronic oral GC users (n = 42), or chronic inhalation GC users (n = 305) vs. controls (n = 24106). Volumes are in mm<sup>3</sup>.

1481x846mm (72 x 72 DPI)

1  
2  
3  
4  
5  
6  
7  
8  
9  
10  
11  
12  
13  
14  
15  
16  
17  
18  
19  
20  
21  
22  
23  
24  
25  
26  
27  
28  
29  
30  
31  
32  
33  
34  
35  
36  
37  
38  
39  
40  
41  
42  
43  
44  
45  
46  
47  
48  
49  
50  
51  
52  
53  
54  
55  
56  
57  
58  
59  
60

| Field ID | Code  | Description                                      |
|----------|-------|--------------------------------------------------|
|          | 20003 | 1140874790 betamethasone                         |
|          | 20003 | 1140874816 dexamethasone                         |
|          | 20003 | 1140874954 hydrocortistab 20mg tablet            |
|          | 20003 | 1140874956 hydrocortone 10mg tablet              |
|          | 20003 | 1140874978 medrone 2mg tablet                    |
|          | 20003 | 1140874976 methylprednisolone                    |
|          | 20003 | 1140874950 prednesol 5mg tablet                  |
|          | 20003 | 1140874930 prednisolone                          |
|          | 20003 | 1141157402 prednisolone product                  |
|          | 20003 | 1140868364 prednisone                            |
|          | 20003 | 1140884704 cortisone product                     |
|          | 20003 | 1140874896 hydrocortisone                        |
|          | 20003 | 1140910424 hc - hydrocortisone                   |
|          | 20003 | 1141157294 hydrocortisone product                |
|          | 20003 | 1141173346 cortisone                             |
|          | 20003 | 1140874944 precortisyl 1mg tablet                |
|          | 20003 | 1140857532 cortelan 25mg tablet                  |
|          | 20003 | 1140857534 oradexon 500micrograms tablet         |
|          | 20003 | 1140868370 decortisyl 5mg tablet                 |
|          | 20003 | 1140868426 triamcinolone                         |
|          | 20003 | 1140868434 ledercort 2mg tablet                  |
|          | 20003 | 1140851210 cortenema 100mg/60ml enema            |
|          | 20003 | 1140874792 betnelan 500mcg tablet                |
|          | 20003 | 1140874794 betnesol 500mcg soluble tablet        |
|          | 20003 | 1140874810 cortistab 5mg tablet                  |
|          | 20003 | 1140874814 cortisyl 25mg tablet                  |
|          | 20003 | 1140874822 decadron 500micrograms tablet         |
|          | 20003 | 1140874936 deltacortril enteric 2.5mg e/c tablet |
|          | 20003 | 1140874940 deltastab 1mg tablet                  |
|          | 20003 | 1140910634 deltahydrocortisone                   |
|          | 20003 | 1140910484 cortisol product                      |

| Field ID | Code       | Description                                                  |
|----------|------------|--------------------------------------------------------------|
| 20003    | 1140855466 | bextasol 100micrograms inhaler                               |
| 20003    | 1140881922 | becodisks 100micrograms disks+diskhaler                      |
| 20003    | 1140881938 | beclomethasone dipropionate+salbutamol                       |
| 20003    | 1141167594 | qvar 50 inhaler                                              |
| 20003    | 1141174512 | budesonide+eformoterol                                       |
| 20003    | 1141174520 | symbicort 100/6 turbohaler                                   |
| 20003    | 1140862572 | budesonide                                                   |
| 20003    | 1140862574 | pulmicort ls 50micrograms inhaler                            |
| 20003    | 1140862584 | pulmicort ls 50micrograms spacer inhaler                     |
| 20003    | 1140862476 | beclazone 50 inhaler                                         |
| 20003    | 1140862380 | becloforte 250micrograms inhaler                             |
| 20003    | 1140862474 | aerobec 50mcg autohaler                                      |
| 20003    | 1140862382 | becotide 50 inhaler                                          |
| 20003    | 1140888098 | fluticasone                                                  |
| 20003    | 1141164086 | salmeterol+fluticasone propionate                            |
| 20003    | 1141176832 | seretide 50 evohaler                                         |
| 20003    | 1141176842 | dexsol 2mg/5ml oral solution                                 |
| 20003    | 1140864286 | flixotide 25micrograms inhaler                               |
| 20003    | 1141191818 | asmanex twisthaler 200mcg breath-actuated dry powder inhaler |
| 20003    | 1140884654 | beclomethasone                                               |
| 20003    | 1140909786 | beclometasone                                                |
| 20003    | 1141179072 | pulvinal beclomethasone diprop 100mcg breath-act dry pdr inh |

## Codes for the psychotropic medications used as exclusion criteria

| Field ID | Code       | Description                                              |
|----------|------------|----------------------------------------------------------|
| 20003    | 1140921600 | citalopram                                               |
| 20003    | 1141180212 | escitalopram                                             |
| 20003    | 1141190158 | cipralext 5mg tablet                                     |
| 20003    | 1141151946 | cipramil 10mg tablet                                     |
| 20003    | 1140879540 | fluoxetine                                               |
| 20003    | 1140867876 | prozac 20mg capsule                                      |
| 20003    | 1140867878 | sertraline                                               |
| 20003    | 1140879544 | fluvoxamine                                              |
| 20003    | 1140867860 | faverin 50mg tablet                                      |
| 20003    | 1140867888 | paroxetine                                               |
| 20003    | 1140882236 | seroxat 20mg tablet                                      |
| 20003    | 1140867884 | lustral 50mg tablet                                      |
| 20003    | 1140916282 | venlafaxine                                              |
| 20003    | 1141200564 | duloxetine                                               |
| 20003    | 1141201834 | cymbalta 30mg gastro-resistant capsule                   |
| 20003    | 1140916288 | efexor 37.5mg tablet                                     |
| 20003    | 1140917460 | nefazodone                                               |
| 20003    | 1140917466 | duotonin 100mg tablet                                    |
| 20003    | 1140879634 | trazodone                                                |
| 20003    | 1141151978 | reboxetine                                               |
| 20003    | 1141151982 | edronax 4mg tablet                                       |
| 20003    | 1140879688 | viloxazine                                               |
| 20003    | 1140867770 | vivalan 50mg tablet                                      |
| 20003    | 1141199446 | atomoxetine                                              |
| 20003    | 1141199460 | strattera 10mg capsule                                   |
| 20003    | 1141176854 | bupropion                                                |
| 20003    | 1140879616 | amitriptyline                                            |
| 20003    | 1140867938 | amitriptyline+chlordiazepoxide 12.5mg/5mg capsule        |
| 20003    | 1140867948 | amitriptyline hydrochloride+perphenazine 10mg/2mg tablet |
| 20003    | 1140867658 | elavil 10mg tablet                                       |
| 20003    | 1140879620 | clomipramine                                             |
| 20003    | 1140867690 | anafranil 10mg capsule                                   |
| 20003    | 1140879624 | desipramine                                              |
| 20003    | 1140909806 | dosulepin                                                |
| 20003    | 1140867624 | prothiaden 25mg capsule                                  |
| 20003    | 1141168396 | doxepin hydrochloride 5% cream                           |
| 20003    | 1140882312 | sinequan 10mg capsule                                    |
| 20003    | 1140879630 | imipramine                                               |
| 20003    | 1140867712 | tofranil 10mg tablet                                     |
| 20003    | 1140867726 | lofepramine                                              |
| 20003    | 1141146062 | lomont 70mg/5ml s/f suspension                           |
| 20003    | 1140882310 | gamanil 70mg tablet                                      |

1  
2 20003 1140867818 nortriptyline  
3 20003 1140867940 fluphenazine hydrochloride+nortriptyline 1.5mg/30mg tablet  
4 20003 1140867942 fluphenazine hcl+nortriptyline 500micrograms/10mg tablet  
5  
6 20003 1140867824 aventyl 10mg capsule  
7 20003 1140879632 protriptyline  
8 20003 1140867756 trimipramine  
9  
10 20003 1140867758 surmontil 10mg tablet  
11 20003 1140867720 iprindole  
12 20003 1140867722 prondol 15mg tablet  
13  
14 20003 1140867734 concordin 5mg tablet  
15 20003 1140856074 butriptyline  
16 20003 1140856076 evadyne 25mg tablet  
17  
18 20003 1140867774 amoxapine  
19 20003 1140867840 asendis 25mg tablet  
20 20003 1140879552 maprotiline  
21  
22 20003 1140867784 ludiomil 10mg tablet  
23 20003 1140879556 mianserin  
24 20003 1141152732 mirtazapine  
25  
26 20003 1140867856 isocarboxazid  
27 20003 1140867858 marplan 10mg tablet  
28 20003 1140910704 maoi - phenelzine  
29  
30 20003 1140867850 phenelzine  
31 20003 1140867852 nardil 15mg tablet  
32 20003 1140867914 tranylcypromine  
33 20003 1140867916 parnate 10mg tablet  
34  
35 20003 1140879668 selegiline  
36 20003 1140872348 eldepryl 5mg tablet  
37 20003 1141169666 zelapar 1.25mg tablet  
38  
39 20003 1140867920 moclobemide  
40 20003 1140867922 manerix 150mg tablet  
41 20003 1140867960 tryptophan product  
42  
43 20003 1140879674 pipothiazine  
44 20003 1141153490 amisulpride  
45 20003 1141184742 solian 100mg/ml s/f oral solution  
46  
47 20003 1141195974 aripiprazole  
48 20003 1141202024 abilify 5mg tablet  
49 20003 1140928916 olanzapine  
50  
51 20003 1141167976 zyprexa 2.5mg tablet  
52 20003 1141152848 quetiapine  
53 20003 1141152860 seroquel 25mg tablet  
54  
55 20003 1140867444 risperidone  
56 20003 1141177762 risperdal 0.5mg tablet  
57 20003 1140867078 benperidol  
58  
59 20003 1140867084 droperidol  
60 20003 1140867080 anquil 250micrograms tablet  
20003 1140867086 droleptan 10mg tablet



|    |                                                                             |
|----|-----------------------------------------------------------------------------|
| 1  |                                                                             |
| 2  | 20003 1140867168 haloperidol                                                |
| 3  | 20003 1140867180 doxic 1mg/ml oral liquid                                   |
| 4  | 20003 1140867184 haldol 5mg tablet                                          |
| 5  |                                                                             |
| 6  | 20003 1140867092 serenace 500micrograms capsule                             |
| 7  | 20003 1140867546 fluspirilene                                               |
| 8  | 20003 1140867548 redeptin 2mg/1ml injection                                 |
| 9  |                                                                             |
| 10 | 20003 1140867218 pimozide                                                   |
| 11 | 20003 1140879658 chlorpromazine                                             |
| 12 | 20003 1140910358 cpz - chlorpromazine                                       |
| 13 |                                                                             |
| 14 | 20003 1140867398 fluphenazine decanoate                                     |
| 15 | 20003 1140867940 fluphenazine hydrochloride+nortriptyline 1.5mg/30mg tablet |
| 16 | 20003 1140867942 fluphenazine hcl+nortriptyline 500micrograms/10mg tablet   |
| 17 |                                                                             |
| 18 | 20003 1140867944 tranylcypromine+trifluoperazine 10mg/1mg tablet            |
| 19 | 20003 1140867948 amitriptyline hydrochloride+perphenazine 10mg/2mg tablet   |
| 20 | 20003 1140909802 levomepromazine                                            |
| 21 |                                                                             |
| 22 | 20003 1140867122 nozinan 25mg tablet                                        |
| 23 | 20003 1140867134 pericyazine                                                |
| 24 | 20003 1140867136 neulactil 2.5mg tablet                                     |
| 25 |                                                                             |
| 26 | 20003 1140867208 perphenazine                                               |
| 27 | 20003 1140867210 fentazin 2mg tablet                                        |
| 28 | 20003 1140909804 pipotiazine                                                |
| 29 |                                                                             |
| 30 | 20003 1140867572 piportil depot 50mg/1ml oily injection                     |
| 31 | 20003 1140868170 prochlorperazine                                           |
| 32 | 20003 1140868172 stemetil 5mg tablet                                        |
| 33 |                                                                             |
| 34 | 20003 1140879746 promazine                                                  |
| 35 | 20003 1140867288 sparine 50mg/5ml suspension                                |
| 36 | 20003 1140882082 promethazine product                                       |
| 37 | 20003 1140879750 thioridazine                                               |
| 38 |                                                                             |
| 39 | 20003 1140867312 melleril 10mg tablet                                       |
| 40 | 20003 1140867304 sulpiride                                                  |
| 41 | 20003 1140868120 trifluoperazine                                            |
| 42 |                                                                             |
| 43 | 20003 1140867244 stelazine 1mg tablet                                       |
| 44 | 20003 1140856052 chlorprothixene                                            |
| 45 | 20003 1140882100 zuclopenthixol                                             |
| 46 | 20003 1140867150 flupenthixol                                               |
| 47 |                                                                             |
| 48 | 20003 1140867152 depixol 3mg tablet                                         |
| 49 | 20003 1140867156 moditen 1mg tablet                                         |
| 50 |                                                                             |
| 51 | 20003 1140867342 clopixol 2mg tablet                                        |
| 52 | 20003 1140867306 dolmatil 200mg tablet                                      |
| 53 | 20003 1141185130 sulpor 200mg/5ml oral solution                             |
| 54 |                                                                             |
| 55 | 20003 1140867406 loxapine                                                   |
| 56 | 20003 1140867414 loxapac 10mg capsule                                       |
| 57 | 20003 1140867420 clozapine                                                  |
| 58 |                                                                             |
| 59 | 20003 1140879704 remoxipride                                                |
| 60 | 20003 1140867432 roxiam 150mg m/r capsule                                   |
|    | 20003 1140882320 clozaril 25mg tablet                                       |

1  
2 20003 1141169714 zotepine  
3 20003 1141169722 zoleptil 25mg tablet  
4 20003 1140927956 sertindole  
5  
6 20003 1140927970 serdolect 4mg tablet  
7 20003 1140855960 fortunan 500micrograms tablet  
8 20003 1141200004 pregabalin  
9  
10 20003 1141200072 lyrica 25mg capsule  
11 20003 1140883656 hydroxyzine  
12 20003 1140863286 atarax 10mg tablet  
13 20003 1140863292 ucerax 25mg tablet  
14 20003 1140863302 lorazepam  
15 20003 1140863308 alprazolam  
16 20003 1140863310 xanax 250mcg tablet  
17 20003 1140863318 bromazepam  
18 20003 1140863320 lexotan 1.5mg tablet  
19 20003 1140863364 ativan 1mg tablet  
20 20003 1140863372 medazepam  
21 20003 1140863374 nobrium 5mg capsule  
22 20003 1140863268 clobazam  
23 20003 1140863272 frisium 10mg capsule  
24 20003 1140863274 potassium clorazepate  
25 20003 1140863276 tranxene 7.5mg capsule  
26 20003 1140863152 diazepam  
27 20003 1140863164 rimapam 2mg tablet  
28 20003 1140863170 diazemuls 10mg/2ml injection  
29 20003 1140863172 dialar 2mg/5ml syrup  
30 20003 1140863234 stesolid 5mg rectal solution  
31 20003 1140863238 tensium 2mg tablet  
32 20003 1140863244 valium 2mg tablet  
33 20003 1140863250 valium 2mg/5ml syrup  
34 20003 1140863442 oxazepam  
35 20003 1140863454 buspar 5mg tablet  
36 20003 1140879730 buspirone  
37 20003 1140855944 prazepam  
38 20003 1140855946 centrax 10mg tablet  
39 20003 1140863328 chlordiazepoxide  
40 20003 1140863350 librium 5mg tablet  
41 20003 1140872150 clonazepam  
42 20003 1140872152 rivotril 500mcg tablet  
43 20003 1140856092 pacitron 500mg tablet  
44 20003 1140856108 villescon tablet  
45  
46  
47  
48  
49  
50  
51  
52  
53  
54  
55  
56  
57  
58  
59  
60

## Codes for the psychi

| Field ID | Code |
|----------|------|
| 20002    | 1081 |
| 20002    | 1082 |
| 20002    | 1083 |
| 20002    | 1086 |
| 20002    | 1240 |
| 20002    | 1243 |
| 20002    | 1244 |
| 20002    | 1245 |
| 20002    | 1246 |
| 20002    | 1247 |
| 20002    | 1248 |
| 20002    | 1249 |
| 20002    | 1250 |
| 20002    | 1251 |
| 20002    | 1252 |
| 20002    | 1254 |
| 20002    | 1255 |
| 20002    | 1256 |
| 20002    | 1257 |
| 20002    | 1258 |
| 20002    | 1259 |
| 20002    | 1260 |
| 20002    | 1261 |
| 20002    | 1262 |
| 20002    | 1263 |
| 20002    | 1264 |
| 20002    | 1265 |
| 20002    | 1266 |
| 20002    | 1267 |
| 20002    | 1289 |
| 20002    | 1394 |
| 20002    | 1397 |
| 20002    | 1408 |
| 20002    | 1409 |
| 20002    | 1410 |
| 20002    | 1425 |
| 20002    | 1433 |
| 20002    | 1436 |
| 20002    | 1437 |
| 20002    | 1469 |
| 20002    | 1470 |
| 20002    | 1491 |

|    |            |      |
|----|------------|------|
| 1  |            |      |
| 2  | 20002      | 1531 |
| 3  | 20002      | 1659 |
| 4  | 20001      | 1031 |
| 5  | 20001      | 1032 |
| 6  | 20001      | 1033 |
| 7  | 20001      | 1033 |
| 8  | 41270 C700 |      |
| 9  | 41270 C701 |      |
| 10 | 41270 C709 |      |
| 11 | 41270 C710 |      |
| 12 | 41270 C711 |      |
| 13 | 41270 C712 |      |
| 14 | 41270 C713 |      |
| 15 | 41270 C714 |      |
| 16 | 41270 C715 |      |
| 17 | 41270 C716 |      |
| 18 | 41270 C717 |      |
| 19 | 41270 C718 |      |
| 20 | 41270 C719 |      |
| 21 | 41270 C720 |      |
| 22 | 41270 C721 |      |
| 23 | 41270 C722 |      |
| 24 | 41270 C723 |      |
| 25 | 41270 C724 |      |
| 26 | 41270 C725 |      |
| 27 | 41270 C728 |      |
| 28 | 41270 C729 |      |
| 29 | 41270 F000 |      |
| 30 | 41270 F001 |      |
| 31 | 41270 F002 |      |
| 32 | 41270 F009 |      |
| 33 | 41270 F010 |      |
| 34 | 41270 F011 |      |
| 35 | 41270 F012 |      |
| 36 | 41270 F013 |      |
| 37 | 41270 F018 |      |
| 38 | 41270 F019 |      |
| 39 | 41270 F020 |      |
| 40 | 41270 F021 |      |
| 41 | 41270 F022 |      |
| 42 | 41270 F023 |      |
| 43 | 41270 F024 |      |
| 44 | 41270 F028 |      |
| 45 | 41270 F03  |      |
| 46 | 41270 F04  |      |
| 47 | 41270 F051 |      |
| 48 | 41270 F060 |      |
| 49 |            |      |
| 50 |            |      |
| 51 |            |      |
| 52 |            |      |
| 53 |            |      |
| 54 |            |      |
| 55 |            |      |
| 56 |            |      |
| 57 |            |      |
| 58 |            |      |
| 59 |            |      |
| 60 |            |      |

1  
2 41270 F061  
3 41270 F062  
4 41270 F065  
5 41270 F066  
6 41270 F067  
7 41270 F068  
8 41270 F069  
9 41270 F070  
10 41270 F071  
11 41270 F072  
12 41270 F078  
13 41270 F079  
14 41270 F09  
15 41270 F100  
16 41270 F101  
17 41270 F102  
18 41270 F103  
19 41270 F104  
20 41270 F105  
21 41270 F106  
22 41270 F107  
23 41270 F108  
24 41270 F109  
25 41270 F110  
26 41270 F111  
27 41270 F112  
28 41270 F113  
29 41270 F114  
30 41270 F115  
31 41270 F117  
32 41270 F119  
33 41270 F120  
34 41270 F121  
35 41270 F122  
36 41270 F123  
37 41270 F125  
38 41270 F128  
39 41270 F129  
40 41270 F130  
41 41270 F131  
42 41270 F132  
43 41270 F133  
44 41270 F134  
45 41270 F139  
46 41270 F140  
47 41270 F141

For peer review only

1  
2 41270 F142  
3 41270 F145  
4 41270 F149  
5 41270 F150  
6 41270 F151  
7 41270 F152  
8 41270 F153  
9 41270 F155  
10 41270 F158  
11 41270 F159  
12 41270 F161  
13 41270 F162  
14 41270 F163  
15 41270 F165  
16 41270 F167  
17 41270 F168  
18 41270 F169  
19 41270 F170  
20 41270 F171  
21 41270 F172  
22 41270 F173  
23 41270 F174  
24 41270 F177  
25 41270 F179  
26 41270 F181  
27 41270 F182  
28 41270 F183  
29 41270 F185  
30 41270 F189  
31 41270 F190  
32 41270 F191  
33 41270 F192  
34 41270 F193  
35 41270 F194  
36 41270 F195  
37 41270 F198  
38 41270 F199  
39 41270 F200  
40 41270 F201  
41 41270 F202  
42 41270 F203  
43 41270 F204  
44 41270 F205  
45 41270 F206  
46 41270 F208  
47 41270 F209  
48  
49  
50  
51  
52  
53  
54  
55  
56  
57  
58  
59  
60

For peer review only

1  
2 41270 F21  
3 41270 F220  
4 41270 F228  
5 41270 F229  
6 41270 F230  
7 41270 F231  
8 41270 F232  
9 41270 F233  
10 41270 F238  
11 41270 F239  
12 41270 F24  
13 41270 F250  
14 41270 F251  
15 41270 F252  
16 41270 F258  
17 41270 F259  
18 41270 F28  
19 41270 F29  
20 41270 F431  
21 41270 F432  
22 41270 F438  
23 41270 F439  
24 41270 F440  
25 41270 F441  
26 41270 F442  
27 41270 F443  
28 41270 F444  
29 41270 F445  
30 41270 F446  
31 41270 F447  
32 41270 F448  
33 41270 F449  
34 41270 F450  
35 41270 F451  
36 41270 F452  
37 41270 F453  
38 41270 F454  
39 41270 F458  
40 41270 F459  
41 41270 F480  
42 41270 F481  
43 41270 F488  
44 41270 F489  
45 41270 F500  
46 41270 F501  
47 41270 F502

For peer review only

1  
2 41270 F505  
3 41270 F508  
4 41270 F509  
5  
6 41270 F530  
7 41270 F531  
8 41270 F538  
9  
10 41270 F539  
11 41270 F54  
12 41270 F55  
13  
14 41270 F59  
15 41270 F600  
16 41270 F601  
17  
18 41270 F602  
19 41270 F603  
20 41270 F604  
21 41270 F605  
22 41270 F606  
23 41270 F607  
24 41270 F608  
25 41270 F609  
26 41270 F61  
27 41270 F620  
28 41270 F621  
29 41270 F628  
30 41270 F629  
31 41270 F630  
32 41270 F631  
33 41270 F632  
34 41270 F633  
35 41270 F638  
36 41270 F639  
37 41270 F680  
38 41270 F681  
39 41270 F688  
40 41270 F69  
41 41270 F700  
42 41270 F701  
43 41270 F708  
44 41270 F709  
45 41270 F711  
46 41270 F719  
47 41270 F729  
48 41270 F780  
49 41270 F789  
50 41270 F790  
51 41270 F798  
52  
53  
54  
55  
56  
57  
58  
59  
60

For peer review only



1  
2 41270 F799  
3 41270 F800  
4 41270 F801  
5  
6 41270 F802  
7 41270 F803  
8 41270 F809  
9  
10 41270 F810  
11 41270 F812  
12 41270 F819  
13  
14 41270 F82  
15 41270 F83  
16 41270 F840  
17 41270 F841  
18 41270 F843  
19 41270 F844  
20 41270 F845  
21 41270 F849  
22 41270 F89  
23 41270 F900  
24 41270 F909  
25 41270 F911  
26 41270 F918  
27 41270 F919  
28 41270 F920  
29 41270 F929  
30 41270 F930  
31 41270 F940  
32 41270 F941  
33 41270 F950  
34 41270 F951  
35 41270 F952  
36 41270 F958  
37 41270 F959  
38 41270 F981  
39 41270 F985  
40 41270 F986  
41 41270 F988  
42 41270 F99  
43 41270 G000  
44 41270 G001  
45 41270 G002  
46 41270 G003  
47 41270 G008  
48 41270 G009  
49 41270 G01  
50 41270 G020

For peer review only

1  
2 41270 G021  
3 41270 G030  
4 41270 G031  
5  
6 41270 G032  
7 41270 G038  
8 41270 G039  
9  
10 41270 G040  
11 41270 G042  
12 41270 G048  
13  
14 41270 G049  
15 41270 G050  
16 41270 G051  
17 41270 G052  
18  
19 41270 G058  
20 41270 G060  
21 41270 G061  
22  
23 41270 G062  
24 41270 G07  
25 41270 G08  
26 41270 G09  
27 41270 G10  
28  
29 41270 G110  
30 41270 G111  
31 41270 G112  
32 41270 G113  
33 41270 G114  
34 41270 G118  
35 41270 G119  
36 41270 G120  
37 41270 G121  
38 41270 G122  
39 41270 G128  
40 41270 G129  
41 41270 G130  
42 41270 G131  
43 41270 G138  
44 41270 G14  
45 41270 G20  
46 41270 G210  
47 41270 G211  
48 41270 G212  
49 41270 G213  
50 41270 G214  
51 41270 G218  
52 41270 G219  
53 41270 G22  
54  
55  
56  
57  
58  
59  
60

For peer review only

1  
2 41270 G230  
3 41270 G231  
4 41270 G232  
5 41270 G233  
6 41270 G238  
7 41270 G239  
8 41270 G240  
9 41270 G241  
10 41270 G242  
11 41270 G243  
12 41270 G244  
13 41270 G245  
14 41270 G248  
15 41270 G249  
16 41270 G250  
17 41270 G251  
18 41270 G252  
19 41270 G253  
20 41270 G254  
21 41270 G255  
22 41270 G258  
23 41270 G259  
24 41270 G300  
25 41270 G301  
26 41270 G308  
27 41270 G309  
28 41270 G310  
29 41270 G311  
30 41270 G312  
31 41270 G318  
32 41270 G319  
33 41270 G320  
34 41270 G328  
35 41270 G35  
36 41270 G360  
37 41270 G368  
38 41270 G369  
39 41270 G370  
40 41270 G371  
41 41270 G372  
42 41270 G373  
43 41270 G374  
44 41270 G378  
45 41270 G378  
46 41270 G379  
47 41270 G400  
48 41270 G401  
49  
50  
51  
52  
53  
54  
55  
56  
57  
58  
59  
60

For peer review only

1  
2 41270 G402  
3 41270 G403  
4 41270 G404  
5 41270 G405  
6 41270 G406  
7 41270 G407  
8 41270 G408  
9 41270 G409  
10 41270 G410  
11 41270 G411  
12 41270 G412  
13 41270 G418  
14 41270 G419  
15 41270 G430  
16 41270 G431  
17 41270 G432  
18 41270 G433  
19 41270 G438  
20 41270 G439  
21 41270 G440  
22 41270 G441  
23 41270 G442  
24 41270 G443  
25 41270 G444  
26 41270 G448  
27 41270 G450  
28 41270 G451  
29 41270 G452  
30 41270 G453  
31 41270 G454  
32 41270 G458  
33 41270 G459  
34 41270 G460  
35 41270 G461  
36 41270 G462  
37 41270 G463  
38 41270 G464  
39 41270 G465  
40 41270 G466  
41 41270 G467  
42 41270 G468  
43 41270 G474  
44 41270 G500  
45 41270 G501  
46 41270 G508  
47 41270 G509  
48  
49  
50  
51  
52  
53  
54  
55  
56  
57  
58  
59  
60

For peer review only

1  
2 41270 G510  
3 41270 G511  
4 41270 G512  
5 41270 G513  
6 41270 G514  
7 41270 G518  
8 41270 G519  
9 41270 G520  
10 41270 G521  
11 41270 G522  
12 41270 G523  
13 41270 G527  
14 41270 G528  
15 41270 G529  
16 41270 G530  
17 41270 G531  
18 41270 G532  
19 41270 G533  
20 41270 G538  
21 41270 G540  
22 41270 G541  
23 41270 G542  
24 41270 G543  
25 41270 G544  
26 41270 G545  
27 41270 G546  
28 41270 G547  
29 41270 G548  
30 41270 G549  
31 41270 G550  
32 41270 G551  
33 41270 G552  
34 41270 G553  
35 41270 G558  
36 41270 G560  
37 41270 G561  
38 41270 G562  
39 41270 G563  
40 41270 G564  
41 41270 G568  
42 41270 G569  
43 41270 G570  
44 41270 G571  
45 41270 G572  
46 41270 G573  
47 41270 G574  
48  
49  
50  
51  
52  
53  
54  
55  
56  
57  
58  
59  
60

For peer review only

1  
2 41270 G575  
3 41270 G576  
4 41270 G578  
5  
6 41270 G579  
7 41270 G580  
8 41270 G587  
9  
10 41270 G588  
11 41270 G589  
12 41270 G590  
13  
14 41270 G598  
15 41270 G600  
16 41270 G602  
17  
18 41270 G603  
19 41270 G608  
20 41270 G609  
21  
22 41270 G610  
23 41270 G611  
24 41270 G618  
25  
26 41270 G619  
27 41270 G620  
28 41270 G621  
29  
30 41270 G622  
31 41270 G628  
32 41270 G629  
33  
34 41270 G630  
35 41270 G631  
36 41270 G632  
37 41270 G633  
38  
39 41270 G634  
40 41270 G635  
41 41270 G636  
42  
43 41270 G638  
44 41270 G64  
45 41270 G700  
46 41270 G702  
47  
48 41270 G708  
49 41270 G709  
50  
51 41270 G710  
52 41270 G711  
53 41270 G712  
54  
55 41270 G713  
56 41270 G718  
57 41270 G719  
58 41270 G720  
59  
60 41270 G721  
41270 G722

For peer review only

1  
2 41270 G723  
3 41270 G724  
4 41270 G728  
5 41270 G729  
6 41270 G730  
7 41270 G731  
8 41270 G735  
9 41270 G736  
10 41270 G737  
11 41270 G800  
12 41270 G801  
13 41270 G802  
14 41270 G803  
15 41270 G808  
16 41270 G809  
17 41270 G810  
18 41270 G811  
19 41270 G819  
20 41270 G820  
21 41270 G821  
22 41270 G822  
23 41270 G823  
24 41270 G824  
25 41270 G825  
26 41270 G830  
27 41270 G831  
28 41270 G832  
29 41270 G833  
30 41270 G834  
31 41270 G835  
32 41270 G838  
33 41270 G839  
34 41270 G900  
35 41270 G901  
36 41270 G902  
37 41270 G903  
38 41270 G904  
39 41270 G908  
40 41270 G909  
41 41270 G910  
42 41270 G911  
43 41270 G912  
44 41270 G913  
45 41270 G918  
46 41270 G919  
47 41270 G92

For peer review only

1  
2 41270 G930  
3 41270 G931  
4 41270 G932  
5 41270 G933  
6 41270 G934  
7 41270 G935  
8 41270 G936  
9 41270 G937  
10 41270 G938  
11 41270 G939  
12 41270 G940  
13 41270 G941  
14 41270 G942  
15 41270 G948  
16 41270 G950  
17 41270 G951  
18 41270 G952  
19 41270 G958  
20 41270 G959  
21 41270 G960  
22 41270 G961  
23 41270 G968  
24 41270 G969  
25 41270 G970  
26 41270 G971  
27 41270 G972  
28 41270 G978  
29 41270 G979  
30 41270 G98  
31 41270 G990  
32 41270 G991  
33 41270 G992  
34 41270 G998  
35 41270 S0200  
36 41270 S0201  
37 41270 S0210  
38 41270 S0211  
39 41270 S0270  
40 41270 S0271  
41 41270 S0280  
42 41270 S9281  
43 41270 S0290  
44 41270 S0291  
45 41270 S040  
46 41270 S041  
47 41270 S042

For peer review only



1  
2 41270 S043  
3 41270 S045  
4 41270 S048  
5  
6 41270 S049  
7 41270 S0600  
8 41270 S0601  
9  
10 41270 S0610  
11 41270 S0620  
12 41270 S0621  
13  
14 41270 S0630  
15 41270 S0631  
16 41270 S0640  
17  
18 41270 S0641  
19 41270 S0650  
20 41270 S0651  
21  
22 41270 S0660  
23 41270 S0661  
24 41270 S0670  
25  
26 41270 S0680  
27 41270 S0681  
28 41270 S0690  
29  
30 41270 S0691  
31 41270 S097  
32 41270 S099  
33  
34 41270 T901  
35 41270 T902  
36 41270 T903  
37 41270 T904  
38  
39 41270 T908  
40 41270 T909  
41 41270 T913  
42  
43  
44  
45  
46  
47  
48  
49  
50  
51  
52  
53  
54  
55  
56  
57  
58  
59  
60

For peer review only

## atric and neurological conditions used as exclusion criteria

### Description

stroke  
transient ischaemic attack (tia)  
subdural haemorrhage/haematoma  
subarachnoid haemorrhage  
neurological injury/trauma  
psychological/psychiatric problem  
infection of nervous system  
brain abscess/intracranial abscess  
encephalitis  
meningitis  
spinal abscess  
cranial nerve problem/palsy  
bell's palsy/facial nerve palsy  
spinal cord disorder  
paraplegia  
peripheral nerve disorder  
peripheral neuropathy  
acute infective polyneuritis/guillain-barre syndrome  
trapped nerve/compressed nerve  
chronic/degenerative neurological problem  
motor neuron disease  
myasthenia gravis  
multiple sclerosis  
Parkinson's disease  
dementia/Alzheimer's/cognitive impairment  
epilepsy  
migraine  
head injury  
spinal injury  
schizophrenia  
peripheral nerve injury  
other demyelinating disease (not multiple sclerosis)  
alcohol dependency  
opioid dependency  
other substance abuse/dependency  
cerebral aneurysm  
cerebral palsy  
headaches (not migraine)  
myasthenia gravis  
post-traumatic stress disorder  
anorexia/bulimia/other eating disorder  
brain haemorrhage

1 post-natal depression  
2  
3 meningioma / benign meningeal tumour  
4 meningeal cancer / malignant meningioma  
5 brain cancer / primary malignant brain tumour  
6 spinal cord or cranial nerve cancer  
7  
8 C70.0 Cerebral meninges  
9  
10 C70.1 Spinal meninges  
11 C70.9 Meninges, unspecified  
12  
13 C71.0 Cerebrum, except lobes and ventricles  
14 C71.1 Frontal lobe  
15 C71.2 Temporal lobe  
16 C71.3 Parietal lobe  
17 C71.4 Occipital lobe  
18 C71.5 Cerebral ventricle  
19 C71.6 Cerebellum  
20 C71.7 Brain stem  
21  
22 C71.8 Overlapping lesion of brain  
23 C71.9 Brain, unspecified  
24  
25 C72.0 Spinal cord  
26 C72.1 Cauda equina  
27 C72.2 Olfactory nerve  
28 C72.3 Optic nerve  
29 C72.4 Acoustic nerve  
30 C72.5 Other and unspecified cranial nerves  
31  
32 C72.8 Overlapping lesion of brain and other parts of central nervous system  
33 C72.9 Central nervous system, unspecified  
34  
35 F00.0 Dementia in Alzheimer's disease with early onset  
36 F00.1 Dementia in Alzheimer's disease with late onset  
37 F00.2 Dementia in Alzheimer's disease, atypical or mixed type  
38 F00.9 Dementia in Alzheimer's disease, unspecified  
39 F01.0 Vascular dementia of acute onset  
40 F01.1 Multi-infarct dementia  
41 F01.2 Subcortical vascular dementia  
42 F01.3 Mixed cortical and subcortical vascular dementia  
43 F01.8 Other vascular dementia  
44 F01.9 Vascular dementia, unspecified  
45  
46 F02.0 Dementia in Pick's disease  
47 F02.1 Dementia in Creutzfeldt-Jakob disease  
48 F02.2 Dementia in Huntington's disease  
49 F02.3 Dementia in Parkinson's disease  
50 F02.4 Dementia in human immunodeficiency virus [HIV] disease  
51 F02.8 Dementia in other specified diseases classified elsewhere  
52 F03 Unspecified dementia  
53 F04 Organic amnesic syndrome, not induced by alcohol and other psychoactive substances  
54 F05.1 Delirium superimposed on dementia  
55 F06.0 Organic hallucinosis

- 1 F06.1 Organic catatonic disorder
- 2 F06.2 Organic delusional [schizophrenia-like] disorder
- 3 F06.5 Organic dissociative disorder
- 4 F06.6 Organic emotionally labile [asthenic] disorder
- 5 F06.7 Mild cognitive disorder
- 6 F06.8 Other specified mental disorders due to brain damage and dysfunction and to physical disease
- 7 F06.9 Unspecified mental disorder due to brain damage and dysfunction and to physical disease
- 8 F07.0 Organic personality disorder
- 9 F07.1 Postencephalitic syndrome
- 10 F07.2 Postconcussional syndrome
- 11 F07.8 Other organic personality and behavioural disorders due to brain disease, damage and dysfunction
- 12 F07.9 Unspecified organic personality and behavioural disorder due to brain disease, damage and dysfunction
- 13 F09 Unspecified organic or symptomatic mental disorder
- 14 F10.0 Acute intoxication
- 15 F10.1 Harmful use
- 16 F10.2 Dependence syndrome
- 17 F10.3 Withdrawal state
- 18 F10.4 Withdrawal state with delirium
- 19 F10.5 Psychotic disorder
- 20 F10.6 Amnesic syndrome
- 21 F10.7 Residual and late-onset psychotic disorder
- 22 F10.8 Other mental and behavioural disorders
- 23 F10.9 Unspecified mental and behavioural disorder
- 24 F11.0 Acute intoxication
- 25 F11.1 Harmful use
- 26 F11.2 Dependence syndrome
- 27 F11.3 Withdrawal state
- 28 F11.4 Withdrawal state with delirium
- 29 F11.5 Psychotic disorder
- 30 F11.7 Residual and late-onset psychotic disorder
- 31 F11.9 Unspecified mental and behavioural disorder
- 32 F12.0 Acute intoxication
- 33 F12.1 Harmful use
- 34 F12.2 Dependence syndrome
- 35 F12.3 Withdrawal state
- 36 F12.5 Psychotic disorder
- 37 F12.8 Other mental and behavioural disorders
- 38 F12.9 Unspecified mental and behavioural disorder
- 39 F13.0 Acute intoxication
- 40 F13.1 Harmful use
- 41 F13.2 Dependence syndrome
- 42 F13.3 Withdrawal state
- 43 F13.4 Withdrawal state with delirium
- 44 F13.9 Unspecified mental and behavioural disorder
- 45 F14.0 Acute intoxication
- 46 F14.1 Harmful use

- 1 F14.2 Dependence syndrome
- 2 F14.5 Psychotic disorder
- 3 F14.9 Unspecified mental and behavioural disorder
- 4 F15.0 Acute intoxication
- 5 F15.1 Harmful use
- 6 F15.2 Dependence syndrome
- 7 F15.3 Withdrawal state
- 8 F15.5 Psychotic disorder
- 9 F15.8 Other mental and behavioural disorders
- 10 F15.9 Unspecified mental and behavioural disorder
- 11 F16.1 Harmful use
- 12 F16.2 Dependence syndrome
- 13 F16.3 Withdrawal state
- 14 F16.5 Psychotic disorder
- 15 F16.7 Residual and late-onset psychotic disorder
- 16 F16.8 Other mental and behavioural disorders
- 17 F16.9 Unspecified mental and behavioural disorder
- 18 F17.0 Acute intoxication
- 19 F17.1 Harmful use
- 20 F17.2 Dependence syndrome
- 21 F17.3 Withdrawal state
- 22 F17.4 Withdrawal state with delirium
- 23 F17.7 Residual and late-onset psychotic disorder
- 24 F17.9 Unspecified mental and behavioural disorder
- 25 F18.1 Harmful use
- 26 F18.2 Dependence syndrome
- 27 F18.3 Withdrawal state
- 28 F18.5 Psychotic disorder
- 29 F18.9 Unspecified mental and behavioural disorder
- 30 F19.0 Acute intoxication
- 31 F19.1 Harmful use
- 32 F19.2 Dependence syndrome
- 33 F19.3 Withdrawal state
- 34 F19.4 Withdrawal state with delirium
- 35 F19.5 Psychotic disorder
- 36 F19.8 Other mental and behavioural disorders
- 37 F19.9 Unspecified mental and behavioural disorder
- 38 F20.0 Paranoid schizophrenia
- 39 F20.1 Hebephrenic schizophrenia
- 40 F20.2 Catatonic schizophrenia
- 41 F20.3 Undifferentiated schizophrenia
- 42 F20.4 Postschizophrenic depression
- 43 F20.5 Residual schizophrenia
- 44 F20.6 Simple schizophrenia
- 45 F20.8 Other schizophrenia
- 46 F20.9 Schizophrenia, unspecified

1 F21 Schizotypal disorder  
2  
3 F22.0 Delusional disorder  
4  
5 F22.8 Other persistent delusional disorders  
6  
7 F22.9 Persistent delusional disorder, unspecified  
8  
9 F23.0 Acute polymorphic psychotic disorder without symptoms of schizophrenia  
10  
11 F23.1 Acute polymorphic psychotic disorder with symptoms of schizophrenia  
12  
13 F23.2 Acute schizophrenia-like psychotic disorder  
14  
15 F23.3 Other acute predominantly delusional psychotic disorders  
16  
17 F23.8 Other acute and transient psychotic disorders  
18  
19 F23.9 Acute and transient psychotic disorder, unspecified  
20  
21 F24 Induced delusional disorder  
22  
23 F25.0 Schizoaffective disorder, manic type  
24  
25 F25.1 Schizoaffective disorder, depressive type  
26  
27 F25.2 Schizoaffective disorder, mixed type  
28  
29 F25.8 Other schizoaffective disorders  
30  
31 F25.9 Schizoaffective disorder, unspecified  
32  
33 F28 Other nonorganic psychotic disorders  
34  
35 F29 Unspecified nonorganic psychosis  
36  
37 F43.1 Posttraumatic stress disorder  
38  
39 F43.2 Adjustment disorders  
40  
41 F43.8 Other reactions to severe stress  
42  
43 F43.9 Reaction to severe stress, unspecified  
44  
45 F44.0 Dissociative amnesia  
46  
47 F44.1 Dissociative fugue  
48  
49 F44.2 Dissociative stupor  
50  
51 F44.3 Trance and possession disorders  
52  
53 F44.4 Dissociative motor disorders  
54  
55 F44.5 Dissociative convulsions  
56  
57 F44.6 Dissociative anaesthesia and sensory loss  
58  
59 F44.7 Mixed dissociative [conversion] disorders  
60  
61 F44.8 Other dissociative [conversion] disorders  
62  
63 F44.9 Dissociative [conversion] disorder, unspecified  
64  
65 F45.0 Somatisation disorder  
66  
67 F45.1 Undifferentiated somatoform disorder  
68  
69 F45.2 Hypochondriacal disorder  
70  
71 F45.3 Somatoform autonomic dysfunction  
72  
73 F45.4 Persistent somatoform pain disorder  
74  
75 F45.8 Other somatoform disorders  
76  
77 F45.9 Somatoform disorder, unspecified  
78  
79 F48.0 Neurasthenia  
80  
81 F48.1 Depersonalisation-derealisation syndrome  
82  
83 F48.8 Other specified neurotic disorders  
84  
85 F48.9 Neurotic disorder, unspecified  
86  
87 F50.0 Anorexia nervosa  
88  
89 F50.1 Atypical anorexia nervosa  
90  
91 F50.2 Bulimia nervosa

- 1 F50.5 Vomiting associated with other psychological disturbances  
2  
3 F50.8 Other eating disorders  
4  
5 F50.9 Eating disorder, unspecified  
6  
7 F53.0 Mild mental and behavioural disorders associated with the puerperium, not elsewhere classified  
8  
9 F53.1 Severe mental and behavioural disorders associated with the puerperium, not elsewhere classified  
10  
11 F53.8 Other mental and behavioural disorders associated with the puerperium, not elsewhere classified  
12  
13 F53.9 Puerperal mental disorder, unspecified  
14  
15 F54 Psychological and behavioural factors associated with disorders or diseases classified elsewhere  
16  
17 F55 Abuse of non-dependence-producing substances  
18  
19 F59 Unspecified behavioural syndromes associated with physiological disturbances and physical factors  
20  
21 F60.0 Paranoid personality disorder  
22  
23 F60.1 Schizoid personality disorder  
24  
25 F60.2 Dissocial personality disorder  
26  
27 F60.3 Emotionally unstable personality disorder  
28  
29 F60.4 Histrionic personality disorder  
30  
31 F60.5 Anankastic personality disorder  
32  
33 F60.6 Anxious [avoidant] personality disorder  
34  
35 F60.7 Dependent personality disorder  
36  
37 F60.8 Other specific personality disorders  
38  
39 F60.9 Personality disorder, unspecified  
40  
41 F61 Mixed and other personality disorders  
42  
43 F62.0 Enduring personality change after catastrophic experience  
44  
45 F62.1 Enduring personality change after psychiatric illness  
46  
47 F62.8 Other enduring personality changes  
48  
49 F62.9 Enduring personality change, unspecified  
50  
51 F63.0 Pathological gambling  
52  
53 F63.1 Pathological fire-setting [pyromania]  
54  
55 F63.2 Pathological stealing [kleptomania]  
56  
57 F63.3 Trichotillomania  
58  
59 F63.8 Other habit and impulse disorders  
60  
61 F63.9 Habit and impulse disorder, unspecified  
62  
63 F68.0 Elaboration of physical symptoms for psychological reasons  
64  
65 F68.1 Intentional production or feigning of symptoms or disabilities, either physical or psychological [factitious disorder]  
66  
67 F68.8 Other specified disorders of adult personality and behaviour  
68  
69 F69 Unspecified disorder of adult personality and behaviour  
70  
71 F70.0 Mild mental retardation (With the statement of no, or minimal, impairment of behaviour)  
72  
73 F70.1 Mild mental retardation (Significant impairment of behaviour requiring attention or treatment)  
74  
75 F70.8 Mild mental retardation (Other impairments of behaviour)  
76  
77 F70.9 Mild mental retardation (Without mention of impairment of behaviour)  
78  
79 F71.1 Moderate mental retardation (Significant impairment of behaviour requiring attention or treatment)  
80  
81 F71.9 Moderate mental retardation (Without mention of impairment of behaviour)  
82  
83 F72.9 Severe mental retardation (Without mention of impairment of behaviour)  
84  
85 F78.0 Other mental retardation (With the statement of no, or minimal, impairment of behaviour)  
86  
87 F78.9 Other mental retardation (Without mention of impairment of behaviour)  
88  
89 F79.0 Unspecified mental retardation (With the statement of no, or minimal, impairment of behaviour)  
90  
91 F79.8 Unspecified mental retardation (Other impairments of behaviour)

1 F79.9 Unspecified mental retardation (Without mention of impairment of behaviour)  
2  
3 F80.0 Specific speech articulation disorder  
4  
5 F80.1 Expressive language disorder  
6  
7 F80.2 Receptive language disorder  
8  
9 F80.3 Acquired aphasia with epilepsy [Landau-Kleffner]  
10  
11 F80.9 Developmental disorder of speech and language, unspecified  
12  
13 F81.0 Specific reading disorder  
14  
15 F81.2 Specific disorder of arithmetical skills  
16  
17 F81.9 Developmental disorder of scholastic skills, unspecified  
18  
19 F82 Specific developmental disorder of motor function  
20  
21 F83 Mixed specific developmental disorders  
22  
23 F84.0 Childhood autism  
24  
25 F84.1 Atypical autism  
26  
27 F84.3 Other childhood disintegrative disorder  
28  
29 F84.4 Overactive disorder associated with mental retardation and stereotyped movements  
30  
31 F84.5 Asperger's syndrome  
32  
33 F84.9 Pervasive developmental disorder, unspecified  
34  
35 F89 Unspecified disorder of psychological development  
36  
37 F90.0 Disturbance of activity and attention  
38  
39 F90.9 Hyperkinetic disorder, unspecified  
40  
41 F91.1 Unsocialised conduct disorder  
42  
43 F91.8 Other conduct disorders  
44  
45 F91.9 Conduct disorder, unspecified  
46  
47 F92.0 Depressive conduct disorder  
48  
49 F92.9 Mixed disorder of conduct and emotions, unspecified  
50  
51 F93.0 Separation anxiety disorder of childhood  
52  
53 F94.0 Elective mutism  
54  
55 F94.1 Reactive attachment disorder of childhood  
56  
57 F95.0 Transient tic disorder  
58  
59 F95.1 Chronic motor or vocal tic disorder  
60  
61 F95.2 Combined vocal and multiple motor tic disorder [de la Tourette]  
62  
63 F95.8 Other tic disorders  
64  
65 F95.9 Tic disorder, unspecified  
66  
67 F98.1 Nonorganic encopresis  
68  
69 F98.5 Stuttering [stammering]  
70  
71 F98.6 Cluttering  
72  
73 F98.8 Other specified behavioural and emotional disorders with onset usually occurring in childhood ;  
74  
75 F99 Mental disorder, not otherwise specified  
76  
77 G00.0 Haemophilus meningitis  
78  
79 G00.1 Pneumococcal meningitis  
80  
81 G00.2 Streptococcal meningitis  
82  
83 G00.3 Staphylococcal meningitis  
84  
85 G00.8 Other bacterial meningitis  
86  
87 G00.9 Bacterial meningitis, unspecified  
88  
89 G01 Meningitis in bacterial diseases classified elsewhere  
90  
91 G02.0 Meningitis in viral diseases classified elsewhere



- 1 G02.1 Meningitis in mycoses
- 2 G03.0 Nonpyogenic meningitis
- 3 G03.1 Chronic meningitis
- 4 G03.2 Benign recurrent meningitis [Mollaret]
- 5 G03.8 Meningitis due to other specified causes
- 6 G03.9 Meningitis, unspecified
- 7 G04.0 Acute disseminated encephalitis
- 8 G04.2 Bacterial meningoencephalitis and meningomyelitis, not elsewhere classified
- 9 G04.8 Other encephalitis, myelitis and encephalomyelitis
- 10 G04.9 Encephalitis, myelitis and encephalomyelitis, unspecified
- 11 G05.0 Encephalitis, myelitis and encephalomyelitis in bacterial diseases classified elsewhere
- 12 G05.1 Encephalitis, myelitis and encephalomyelitis in viral diseases classified elsewhere
- 13 G05.2 Encephalitis, myelitis and encephalomyelitis in other infectious and parasitic diseases classified
- 14 G05.8 Encephalitis, myelitis and encephalomyelitis in other diseases classified elsewhere
- 15 G06.0 Intracranial abscess and granuloma
- 16 G06.1 Intraspinal abscess and granuloma
- 17 G06.2 Extradural and subdural abscess, unspecified
- 18 G07 Intracranial and intraspinal abscess and granuloma in diseases classified elsewhere
- 19 G08 Intracranial and intraspinal phlebitis and thrombophlebitis
- 20 G09 Sequelae of inflammatory diseases of central nervous system
- 21 G10 Huntington's disease
- 22 G11.0 Congenital nonprogressive ataxia
- 23 G11.1 Early-onset cerebellar ataxia
- 24 G11.2 Late-onset cerebellar ataxia
- 25 G11.3 Cerebellar ataxia with defective DNA repair
- 26 G11.4 Hereditary spastic paraplegia
- 27 G11.8 Other hereditary ataxias
- 28 G11.9 Hereditary ataxia, unspecified
- 29 G12.0 Infantile spinal muscular atrophy, type I [Werdnig-Hoffman]
- 30 G12.1 Other inherited spinal muscular atrophy
- 31 G12.2 Motor neuron disease
- 32 G12.8 Other spinal muscular atrophies and related syndromes
- 33 G12.9 Spinal muscular atrophy, unspecified
- 34 G13.0 Paraneoplastic neuromyopathy and neuropathy
- 35 G13.1 Other systemic atrophy primarily affecting central nervous system in neoplastic disease
- 36 G13.8 Systemic atrophy primarily affecting central nervous system in other diseases classified elsewhere
- 37 G14 Postpolio syndrome
- 38 G20 Parkinson's disease
- 39 G21.0 Malignant neuroleptic syndrome
- 40 G21.1 Other drug-induced secondary Parkinsonism
- 41 G21.2 Secondary Parkinsonism due to other external agents
- 42 G21.3 Postencephalitic Parkinsonism
- 43 G21.4 Vascular parkinsonism
- 44 G21.8 Other secondary Parkinsonism
- 45 G21.9 Secondary Parkinsonism, unspecified
- 46 G22 Parkinsonism in diseases classified elsewhere

- 1 G23.0 Hallervorden-Spatz disease
- 2 G23.1 Progressive supranuclear ophthalmoplegia [Steele-Richardson-Olszewski]
- 3 G23.2 Striatonigral degeneration
- 4 G23.3 Multiple system atrophy, cerebellar type
- 5 G23.8 Other specified degenerative diseases of basal ganglia
- 6 G23.9 Degenerative disease of basal ganglia, unspecified
- 7 G24.0 Drug-induced dystonia
- 8 G24.1 Idiopathic familial dystonia
- 9 G24.2 Idiopathic nonfamilial dystonia
- 10 G24.3 Spasmodic torticollis
- 11 G24.4 Idiopathic orofacial dystonia
- 12 G24.5 Blepharospasm
- 13 G24.8 Other dystonia
- 14 G24.9 Dystonia, unspecified
- 15 G25.0 Essential tremor
- 16 G25.1 Drug-induced tremor
- 17 G25.2 Other specified forms of tremor
- 18 G25.3 Myoclonus
- 19 G25.4 Drug-induced chorea
- 20 G25.5 Other chorea
- 21 G25.8 Other specified extrapyramidal and movement disorders
- 22 G25.9 Extrapyramidal and movement disorder, unspecified
- 23 G30.0 Alzheimer's disease with early onset
- 24 G30.1 Alzheimer's disease with late onset
- 25 G30.8 Other Alzheimer's disease
- 26 G30.9 Alzheimer's disease, unspecified
- 27 G31.0 Circumscribed brain atrophy
- 28 G31.1 Senile degeneration of brain, not elsewhere classified
- 29 G31.2 Degeneration of nervous system due to alcohol
- 30 G31.8 Other specified degenerative diseases of nervous system
- 31 G31.9 Degenerative disease of nervous system, unspecified
- 32 G32.0 Subacute combined degeneration of spinal cord in diseases classified elsewhere
- 33 G32.8 Other specified degenerative disorders of nervous system in diseases classified elsewhere
- 34 G35 Multiple sclerosis
- 35 G36.0 Neuromyelitis optica [Devic]
- 36 G36.8 Other specified acute disseminated demyelination
- 37 G36.9 Acute disseminated demyelination, unspecified
- 38 G37.0 Diffuse sclerosis
- 39 G37.1 Central demyelination of corpus callosum
- 40 G37.2 Central pontine myelinolysis
- 41 G37.3 Acute transverse myelitis in demyelinating disease of central nervous system
- 42 G37.4 Subacute necrotising myelitis
- 43 G37.8 Other specified demyelinating diseases of central nervous system
- 44 G37.9 Demyelinating disease of central nervous system, unspecified
- 45 G40.0 Localisation-related (focal) (partial) idiopathic epilepsy and epileptic syndromes with seizures
- 46 G40.1 Localisation-related (focal) (partial) symptomatic epilepsy and epileptic syndromes with simple

- 1 G40.2 Localisation-related (focal) (partial) symptomatic epilepsy and epileptic syndromes with complex partial seizures
- 2 G40.3 Generalised idiopathic epilepsy and epileptic syndromes
- 3 G40.4 Other generalised epilepsy and epileptic syndromes
- 4 G40.5 Special epileptic syndromes
- 5 G40.6 Grand mal seizures, unspecified (with or without petit mal)
- 6 G40.7 Petit mal, unspecified, without grand mal seizures
- 7 G40.8 Other epilepsy
- 8 G40.9 Epilepsy, unspecified
- 9 G41.0 Grand mal status epilepticus
- 10 G41.1 Petit mal status epilepticus
- 11 G41.2 Complex partial status epilepticus
- 12 G41.8 Other status epilepticus
- 13 G41.9 Status epilepticus, unspecified
- 14 G43.0 Migraine without aura [common migraine]
- 15 G43.1 Migraine with aura [classical migraine]
- 16 G43.2 Status migrainosus
- 17 G43.3 Complicated migraine
- 18 G43.8 Other migraine
- 19 G43.9 Migraine, unspecified
- 20 G44.0 Cluster headache syndrome
- 21 G44.1 Vascular headache, not elsewhere classified
- 22 G44.2 Tension-type headache
- 23 G44.3 Chronic posttraumatic headache
- 24 G44.4 Drug-induced headache, not elsewhere classified
- 25 G44.8 Other specified headache syndromes
- 26 G45.0 Vertebro-basilar artery syndrome
- 27 G45.1 Carotid artery syndrome (hemispheric)
- 28 G45.2 Multiple and bilateral precerebral artery syndromes
- 29 G45.3 Amaurosis fugax
- 30 G45.4 Transient global amnesia
- 31 G45.8 Other transient cerebral ischaemic attacks and related syndromes
- 32 G45.9 Transient cerebral ischaemic attack, unspecified
- 33 G46.0 Middle cerebral artery syndrome
- 34 G46.1 Anterior cerebral artery syndrome
- 35 G46.2 Posterior cerebral artery syndrome
- 36 G46.3 Brain stem stroke syndrome
- 37 G46.4 Cerebellar stroke syndrome
- 38 G46.5 Pure motor lacunar syndrome
- 39 G46.6 Pure sensory lacunar syndrome
- 40 G46.7 Other lacunar syndromes
- 41 G46.8 Other vascular syndromes of brain in cerebrovascular diseases
- 42 G47.4 Narcolepsy and cataplexy
- 43 G50.0 Trigeminal neuralgia
- 44 G50.1 Atypical facial pain
- 45 G50.8 Other disorders of trigeminal nerve
- 46 G50.9 Disorder of trigeminal nerve, unspecified

- 1 G51.0 Bell's palsy
- 2
- 3 G51.1 Geniculate ganglionitis
- 4
- 5 G51.2 Melkersson's syndrome
- 6
- 7 G51.3 Clonic hemifacial spasm
- 8
- 9 G51.4 Facial myokymia
- 10
- 11 G51.8 Other disorders of facial nerve
- 12
- 13 G51.9 Disorder of facial nerve, unspecified
- 14
- 15 G52.0 Disorders of olfactory nerve
- 16
- 17 G52.1 Disorders of glossopharyngeal nerve
- 18
- 19 G52.2 Disorders of vagus nerve
- 20
- 21 G52.3 Disorders of hypoglossal nerve
- 22
- 23 G52.7 Disorders of multiple cranial nerves
- 24
- 25 G52.8 Disorders of other specified cranial nerves
- 26
- 27 G52.9 Cranial nerve disorder, unspecified
- 28
- 29 G53.0 Postzoster neuralgia
- 30
- 31 G53.1 Multiple cranial nerve palsies in infectious and parasitic diseases classified elsewhere
- 32
- 33 G53.2 Multiple cranial nerve palsies in sarcoidosis
- 34
- 35 G53.3 Multiple cranial nerve palsies in neoplastic disease
- 36
- 37 G53.8 Other cranial nerve disorders in other diseases classified elsewhere
- 38
- 39 G54.0 Brachial plexus disorders
- 40
- 41 G54.1 Lumbosacral plexus disorders
- 42
- 43 G54.2 Cervical root disorders, not elsewhere classified
- 44
- 45 G54.3 Thoracic root disorders, not elsewhere classified
- 46
- 47 G54.4 Lumbosacral root disorders, not elsewhere classified
- 48
- 49 G54.5 Neuralgic amyotrophy
- 50
- 51 G54.6 Phantom limb syndrome with pain
- 52
- 53 G54.7 Phantom limb syndrome without pain
- 54
- 55 G54.8 Other nerve root and plexus disorders
- 56
- 57 G54.9 Nerve root and plexus disorder, unspecified
- 58
- 59 G55.0 Nerve root and plexus compressions in neoplastic disease
- 60
- G55.1 Nerve root and plexus compressions in intervertebral disk disorders
- G55.2 Nerve root and plexus compressions in spondylosis
- G55.3 Nerve root and plexus compressions in other dorsopathies
- G55.8 Nerve root and plexus compressions in other diseases classified elsewhere
- G56.0 Carpal tunnel syndrome
- G56.1 Other lesions of median nerve
- G56.2 Lesion of ulnar nerve
- G56.3 Lesion of radial nerve
- G56.4 Causalgia
- G56.8 Other mononeuropathies of upper limb
- G56.9 Mononeuropathy of upper limb, unspecified
- G57.0 Lesion of sciatic nerve
- G57.1 Meralgia paraesthetica
- G57.2 Lesion of femoral nerve
- G57.3 Lesion of lateral popliteal nerve
- G57.4 Lesion of medial popliteal nerve

- 1 G57.5 Tarsal tunnel syndrome
- 2 G57.6 Lesion of plantar nerve
- 3 G57.8 Other mononeuropathies of lower limb
- 4 G57.9 Mononeuropathy of lower limb, unspecified
- 5 G58.0 Intercostal neuropathy
- 6 G58.7 Mononeuritis multiplex
- 7 G58.8 Other specified mononeuropathies
- 8 G58.9 Mononeuropathy, unspecified
- 9 G59.0 Diabetic mononeuropathy
- 10 G59.8 Other mononeuropathies in diseases classified elsewhere
- 11 G60.0 Hereditary motor and sensory neuropathy
- 12 G60.2 Neuropathy in association with hereditary ataxia
- 13 G60.3 Idiopathic progressive neuropathy
- 14 G60.8 Other hereditary and idiopathic neuropathies
- 15 G60.9 Hereditary and idiopathic neuropathy, unspecified
- 16 G61.0 Guillain-Barre syndrome
- 17 G61.1 Serum neuropathy<sup>1</sup>
- 18 G61.8 Other inflammatory polyneuropathies
- 19 G61.9 Inflammatory polyneuropathy, unspecified
- 20 G62.0 Drug-induced polyneuropathy
- 21 G62.1 Alcoholic polyneuropathy
- 22 G62.2 Polyneuropathy due to other toxic agents
- 23 G62.8 Other specified polyneuropathies
- 24 G62.9 Polyneuropathy, unspecified
- 25 G63.0 Polyneuropathy in infectious and parasitic diseases classified elsewhere
- 26 G63.1 Polyneuropathy in neoplastic disease
- 27 G63.2 Diabetic polyneuropathy
- 28 G63.3 Polyneuropathy in other endocrine and metabolic diseases
- 29 G63.4 Polyneuropathy in nutritional deficiency
- 30 G63.5 Polyneuropathy in systemic connective tissue disorders
- 31 G63.6 Polyneuropathy in other musculoskeletal disorders
- 32 G63.8 Polyneuropathy in other diseases classified elsewhere
- 33 G64 Other disorders of peripheral nervous system
- 34 G70.0 Myasthenia gravis
- 35 G70.2 Congenital and developmental myasthenia
- 36 G70.8 Other specified myoneural disorders
- 37 G70.9 Myoneural disorder, unspecified
- 38 G71.0 Muscular dystrophy
- 39 G71.1 Myotonic disorders
- 40 G71.2 Congenital myopathies
- 41 G71.3 Mitochondrial myopathy, not elsewhere classified
- 42 G71.8 Other primary disorders of muscles
- 43 G71.9 Primary disorder of muscle, unspecified
- 44 G72.0 Drug-induced myopathy
- 45 G72.1 Alcoholic myopathy
- 46 G72.2 Myopathy due to other toxic agents

1 G72.3 Periodic paralysis  
2  
3 G72.4 Inflammatory myopathy, not elsewhere classified  
4  
5 G72.8 Other specified myopathies  
6  
7 G72.9 Myopathy, unspecified  
8  
9 G73.0 Myasthenic syndromes in endocrine diseases  
10  
11 G73.1 Eaton-Lambert syndrome  
12  
13 G73.5 Myopathy in endocrine diseases  
14  
15 G73.6 Myopathy in metabolic diseases  
16  
17 G73.7 Myopathy other diseases classified elsewhere  
18  
19 G80.0 Spastic cerebral palsy  
20  
21 G80.1 Spastic diplegia  
22  
23 G80.2 Infantile hemiplegia  
24  
25 G80.3 Dyskinetic cerebral palsy  
26  
27 G80.8 Other infantile cerebral palsy  
28  
29 G80.9 Infantile cerebral palsy, unspecified  
30  
31 G81.0 Flaccid hemiplegia  
32  
33 G81.1 Spastic hemiplegia  
34  
35 G81.9 Hemiplegia, unspecified  
36  
37 G82.0 Flaccid paraplegia  
38  
39 G82.1 Spastic paraplegia  
40  
41 G82.2 Paraplegia, unspecified  
42  
43 G82.3 Flaccid tetraplegia  
44  
45 G82.4 Spastic tetraplegia  
46  
47 G82.5 Tetraplegia, unspecified  
48  
49 G83.0 Diplegia of upper limbs  
50  
51 G83.1 Monoplegia of lower limb  
52  
53 G83.2 Monoplegia of upper limb  
54  
55 G83.3 Monoplegia, unspecified  
56  
57 G83.4 Cauda equina syndrome  
58  
59 G83.5 Locked-in syndrome  
60  
61 G83.8 Other specified paralytic syndromes  
62  
63 G83.9 Paralytic syndrome, unspecified  
64  
65 G90.0 Idiopathic peripheral autonomic neuropathy  
66  
67 G90.1 Familial dysautonomia [Riley-Day]  
68  
69 G90.2 Horner's syndrome  
70  
71 G90.3 Multisystem degeneration  
72  
73 G90.4 Autonomic dysreflexia  
74  
75 G90.8 Other disorders of autonomic nervous system  
76  
77 G90.9 Disorder of autonomic nervous system, unspecified  
78  
79 G91.0 Communicating hydrocephalus  
80  
81 G91.1 Obstructive hydrocephalus  
82  
83 G91.2 Normal-pressure hydrocephalus  
84  
85 G91.3 Posttraumatic hydrocephalus, unspecified  
86  
87 G91.8 Other hydrocephalus  
88  
89 G91.9 Hydrocephalus, unspecified  
90  
91 G92 Toxic encephalopathy

1 G93.0 Cerebral cysts  
2  
3 G93.1 Anoxic brain damage, not elsewhere classified  
4  
5 G93.2 Benign intracranial hypertension  
6  
7 G93.3 Postviral fatigue syndrome  
8  
9 G93.4 Encephalopathy, unspecified  
10  
11 G93.5 Compression of brain  
12  
13 G93.6 Cerebral oedema  
14  
15 G93.7 Reye's syndrome  
16  
17 G93.8 Other specified disorders of brain  
18  
19 G93.9 Disorder of brain, unspecified  
20  
21 G94.0 Hydrocephalus in infectious and parasitic diseases classified elsewhere  
22  
23 G94.1 Hydrocephalus in neoplastic disease  
24  
25 G94.2 Hydrocephalus in other diseases classified elsewhere  
26  
27 G94.8 Other specified disorders of brain in diseases classified elsewhere  
28  
29 G95.0 Syringomyelia and syringobulbia  
30  
31 G95.1 Vascular myelopathies  
32  
33 G95.2 Cord compression, unspecified  
34  
35 G95.8 Other specified diseases of spinal cord  
36  
37 G95.9 Disease of spinal cord, unspecified  
38  
39 G96.0 Cerebrospinal fluid leak  
40  
41 G96.1 Disorders of meninges, not elsewhere classified  
42  
43 G96.8 Other specified disorders of central nervous system  
44  
45 G96.9 Disorder of central nervous system, unspecified  
46  
47 G97.0 Cerebrospinal fluid leak from spinal puncture  
48  
49 G97.1 Other reaction to spinal and lumbar puncture  
50  
51 G97.2 Intracranial hypotension following ventricular shunting  
52  
53 G97.8 Other postprocedural disorders of nervous system  
54  
55 G97.9 Postprocedural disorder of nervous system, unspecified  
56  
57 G98 Other disorders of nervous system, not elsewhere classified  
58  
59 G99.0 Autonomic neuropathy in endocrine and metabolic diseases  
60  
61 G99.1 Other disorders of autonomic nervous system in other diseases classified elsewhere  
62  
63 G99.2 Myelopathy in diseases classified elsewhere  
64  
65 G99.8 Other specified disorders of nervous system in diseases classified elsewhere  
66  
67 S02.00 Fracture of vault of skull (closed)  
68  
69 S02.01 Fracture of vault of skull (open)  
70  
71 S02.10 Fracture of base of skull (closed)  
72  
73 S02.11 Fracture of base of skull (open)  
74  
75 S02.70 Multiple fractures involving skull and facial bones (closed)  
76  
77 S02.71 Multiple fractures involving skull and facial bones (open)  
78  
79 S02.80 Fractures of other skull and facial bones (closed)  
80  
81 S02.81 Fractures of other skull and facial bones (open)  
82  
83 S02.90 Fracture of skull and facial bones, part unspecified (closed)  
84  
85 S02.91 Fracture of skull and facial bones, part unspecified (open)  
86  
87 S04.0 Injury of optic nerve and pathways  
88  
89 S04.1 Injury of oculomotor nerve  
90  
91 S04.2 Injury of trochlear nerve

1 S04.3 Injury of trigeminal nerve  
2 S04.5 Injury of facial nerve  
3 S04.8 Injury of other cranial nerves  
4 S04.9 Injury of unspecified cranial nerve  
5 S06.00 Concussion (without open intracranial wound)  
6 S06.01 Concussion (with open intracranial wound)  
7 S06.10 Traumatic cerebral oedema (without open intracranial wound)  
8 S06.20 Diffuse brain injury (without open intracranial wound)  
9 S06.21 Diffuse brain injury (with open intracranial wound)  
10 S06.30 Focal brain injury (without open intracranial wound)  
11 S06.31 Focal brain injury (with open intracranial wound)  
12 S06.40 Epidural haemorrhage (without open intracranial wound)  
13 S06.41 Epidural haemorrhage (with open intracranial wound)  
14 S06.50 Traumatic subdural haemorrhage (without open intracranial wound)  
15 S06.51 Traumatic subdural haemorrhage (with open intracranial wound)  
16 S06.60 Traumatic subarachnoid haemorrhage (without open intracranial wound)  
17 S06.61 Traumatic subarachnoid haemorrhage (with open intracranial wound)  
18 S06.70 Intracranial injury with prolonged coma (without open intracranial wound)  
19 S06.80 Other intracranial injuries (without open intracranial wound)  
20 S06.81 Other intracranial injuries (with open intracranial wound)  
21 S06.90 Intracranial injury, unspecified (without open intracranial wound)  
22 S06.91 Intracranial injury, unspecified (with open intracranial wound)  
23 S09.7 Multiple injuries of head  
24 S09.9 Unspecified injury of head  
25 T90.1 Sequelae of open wound of head  
26 T90.2 Sequelae of fracture of skull and facial bones  
27 T90.3 Sequelae of injury of cranial nerves  
28 T90.5 Sequelae of intracranial injury  
29 T90.8 Sequelae of other specified injuries of head  
30 T90.9 Sequelae of unspecified injury of head  
31 T91.3 Sequelae of injury of spinal cord  
32  
33  
34  
35  
36  
37  
38  
39  
40  
41  
42  
43  
44  
45  
46  
47  
48  
49  
50  
51  
52  
53  
54  
55  
56  
57  
58  
59  
60



## Codes for the endoc

| Field ID | Code |
|----------|------|
| 20002    | 1214 |
| 20002    | 1220 |
| 20002    | 1221 |
| 20002    | 1222 |
| 20002    | 1223 |
| 20002    | 1224 |
| 20002    | 1225 |
| 20002    | 1226 |
| 20002    | 1228 |
| 20002    | 1229 |
| 20002    | 1230 |
| 20002    | 1232 |
| 20002    | 1233 |
| 20002    | 1234 |
| 20002    | 1235 |
| 20002    | 1236 |
| 20002    | 1237 |
| 20002    | 1238 |
| 20002    | 1239 |
| 20002    | 1350 |
| 20002    | 1428 |
| 20002    | 1429 |
| 20002    | 1430 |
| 20002    | 1431 |
| 20002    | 1432 |
| 20002    | 1521 |
| 20002    | 1522 |
| 20002    | 1610 |
| 20002    | 1611 |
| 20002    | 1682 |
| 41270    | C73  |
| 41270    | C740 |
| 41270    | C741 |
| 41270    | C749 |
| 41270    | C750 |
| 41270    | C751 |
| 41270    | C752 |
| 41270    | C753 |
| 41270    | C754 |
| 41270    | C755 |
| 41270    | C758 |
| 41270    | C759 |

1  
2 41270 E011  
3 41270 E018  
4 41270 E02  
5  
6 41270 E030  
7 41270 E031  
8 41270 E032  
9  
10 41270 E033  
11 41270 E034  
12 41270 E035  
13  
14 41270 E038  
15 41270 E039  
16 41270 E040  
17 41270 E041  
18 41270 E042  
19 41270 E048  
20 41270 E049  
21 41270 E050  
22 41270 E051  
23 41270 E052  
24 41270 E053  
25 41270 E054  
26 41270 E055  
27 41270 E058  
28 41270 E059  
29 41270 E060  
30 41270 E061  
31 41270 E062  
32 41270 E063  
33 41270 E064  
34 41270 E065  
35 41270 E069  
36 41270 E070  
37 41270 E071  
38 41270 E078  
39 41270 E079  
40 41270 E100  
41 41270 E101  
42 41270 E102  
43 41270 E103  
44 41270 E104  
45 41270 E105  
46 41270 E106  
47 41270 E107  
48 41270 E108  
49 41270 E109  
50 41270 E110  
51  
52  
53  
54  
55  
56  
57  
58  
59  
60

For peer review only

1  
2 41270 E111  
3 41270 E112  
4 41270 E113  
5 41270 E114  
6 41270 E114  
7 41270 E115  
8 41270 E116  
9  
10 41270 E117  
11 41270 E118  
12 41270 E119  
13  
14 41270 E121  
15 41270 E123  
16 41270 E125  
17  
18 41270 E128  
19 41270 E129  
20 41270 E130  
21  
22 41270 E131  
23 41270 E132  
24 41270 E133  
25  
26 41270 E134  
27 41270 E135  
28 41270 E136  
29  
30 41270 E137  
31 41270 E138  
32 41270 E139  
33  
34 41270 E140  
35 41270 E141  
36 41270 E142  
37 41270 E143  
38  
39 41270 E144  
40 41270 E145  
41 41270 E146  
42  
43 41270 E147  
44 41270 E148  
45 41270 E149  
46  
47 41270 E15  
48 41270 E160  
49 41270 E161  
50  
51 41270 E162  
52 41270 E163  
53 41270 E164  
54  
55 41270 E168  
56 41270 E169  
57 41270 E200  
58 41270 E201  
59  
60 41270 E208  
41270 E209

For peer review only

1  
2 41270 E210  
3 41270 E211  
4 41270 E212  
5 41270 E213  
6 41270 E214  
7 41270 E215  
8 41270 E220  
9 41270 E221  
10 41270 E222  
11 41270 E228  
12 41270 E229  
13 41270 E230  
14 41270 E231  
15 41270 E232  
16 41270 E233  
17 41270 E236  
18 41270 E237  
19 41270 E240  
20 41270 E241  
21 41270 E242  
22 41270 E243  
23 41270 E244  
24 41270 E248  
25 41270 E249  
26 41270 E250  
27 41270 E258  
28 41270 E259  
29 41270 E270  
30 41270 E271  
31 41270 E272  
32 41270 E273  
33 41270 E274  
34 41270 E275  
35 41270 E278  
36 41270 E279  
37 41270 E281  
38 41270 E282  
39 41270 E283  
40 41270 E288  
41 41270 E289  
42 41270 E290  
43 41270 E291  
44 41270 E298  
45 41270 E299  
46 41270 E351  
47 41270 E340  
48  
49  
50  
51  
52  
53  
54  
55  
56  
57  
58  
59  
60

For peer review only

1  
2 rine conditions used as exclusion criteria for the control group  
3  
4

5 **Description**

6 testicular problems (not cancer)  
7 diabetes  
8 gestational diabetes  
9 type 1 diabetes  
10 type 2 diabetes  
11 thyroid problem (not cancer)  
12 hyperthyroidism/thyrotoxicosis  
13 hypothyroidism/myxoedema  
14 thyroid radioablation therapy  
15 parathyroid gland problem (not cancer)  
16 parathyroid hyperplasia/adenoma  
17 disorder of adrenal gland  
18 adrenal tumour  
19 adrenocortical insufficiency/addison's disease  
20 hyperaldosteronism/conn's syndrome  
21 phaeochromocytoma  
22 disorder of pituitary gland  
23 pituitary adenoma/tumour  
24 cushings syndrome  
25 polycystic ovaries/polycystic ovarian syndrome  
26 thyroiditis  
27 acromegaly  
28 hypopituitarism  
29 hyperprolactinaemia  
30 carcinoid syndrome/tumour  
31 diabetes insipidus  
32 grave's disease  
33 thyroid goitre  
34 hyperparathyroidism  
35 benign insulinoma  
36 C73 Malignant neoplasm of thyroid gland  
37 C74.0 Cortex of adrenal gland  
38 C74.1 Medulla of adrenal gland  
39 C74.9 Adrenal gland, unspecified  
40 C75.0 Parathyroid gland  
41 C75.1 Pituitary gland  
42 C75.2 Craniopharyngeal duct  
43 C75.3 Pineal gland  
44 C75.4 Carotid body  
45 C75.5 Aortic body and other paraganglia  
46 C75.8 Pluriglandular involvement, unspecified  
47 C75.9 Endocrine gland, unspecified  
48  
49  
50  
51  
52  
53  
54  
55  
56  
57  
58  
59  
60

- 1 E01.1 Iodine-deficiency-related multinodular (endemic) goitre
- 2 E01.8 Other iodine-deficiency-related thyroid disorders and allied conditions
- 3 E02 Subclinical iodine-deficiency hypothyroidism
- 4 E03.0 Congenital hypothyroidism with diffuse goitre
- 5 E03.1 Congenital hypothyroidism without goitre
- 6 E03.2 Hypothyroidism due to medicaments and other exogenous substances
- 7 E03.3 Postinfectious hypothyroidism
- 8 E03.4 Atrophy of thyroid (acquired)
- 9 E03.5 Myxoedema coma
- 10 E03.8 Other specified hypothyroidism
- 11 E03.9 Hypothyroidism, unspecified
- 12 E04.0 Non-toxic diffuse goitre
- 13 E04.1 Non-toxic single thyroid nodule
- 14 E04.2 Non-toxic multinodular goitre
- 15 E04.8 Other specified non-toxic goitre
- 16 E04.9 Non-toxic goitre, unspecified
- 17 E05.0 Thyrotoxicosis with diffuse goitre
- 18 E05.1 Thyrotoxicosis with toxic single thyroid nodule
- 19 E05.2 Thyrotoxicosis with toxic multinodular goitre
- 20 E05.3 Thyrotoxicosis from ectopic thyroid tissue
- 21 E05.4 Thyrotoxicosis factitia
- 22 E05.5 Thyroid crisis or storm
- 23 E05.8 Other thyrotoxicosis
- 24 E05.9 Thyrotoxicosis, unspecified
- 25 E06.0 Acute thyroiditis
- 26 E06.1 Subacute thyroiditis
- 27 E06.2 Chronic thyroiditis with transient thyrotoxicosis
- 28 E06.3 Autoimmune thyroiditis
- 29 E06.4 Drug-induced thyroiditis
- 30 E06.5 Other chronic thyroiditis
- 31 E06.9 Thyroiditis, unspecified
- 32 E07.0 Hypersecretion of calcitonin
- 33 E07.1 Dyshormogenetic goitre
- 34 E07.8 Other specified disorders of thyroid
- 35 E07.9 Disorder of thyroid, unspecified
- 36 E10.0 With coma
- 37 E10.1 With ketoacidosis
- 38 E10.2 With renal complications
- 39 E10.3 With ophthalmic complications
- 40 E10.4 With neurological complications
- 41 E10.5 With peripheral circulatory complications
- 42 E10.6 With other specified complications
- 43 E10.7 With multiple complications
- 44 E10.8 With unspecified complications
- 45 E10.9 Without complications
- 46 E11.0 With coma

- 1 E11.1 With ketoacidosis
- 2 E11.2 With renal complications
- 3 E11.3 With ophthalmic complications
- 4 E11.4 With neurological complications
- 5 E11.5 With peripheral circulatory complications
- 6 E11.6 With other specified complications
- 7 E11.7 With multiple complications
- 8 E11.8 With unspecified complications
- 9 E11.9 Without complications
- 10 E12.1 With ketoacidosis
- 11 E12.3 With ophthalmic complications
- 12 E12.5 With peripheral circulatory complications
- 13 E12.8 With unspecified complications
- 14 E12.9 Without complications
- 15 E13.0 With coma
- 16 E13.1 With ketoacidosis
- 17 E13.2 With renal complications
- 18 E13.3 With ophthalmic complications
- 19 E13.4 With neurological complications
- 20 E13.5 With peripheral circulatory complications
- 21 E13.6 With other specified complications
- 22 E13.7 With multiple complications
- 23 E13.8 With unspecified complications
- 24 E13.9 Without complications
- 25 E14.0 With coma
- 26 E14.1 With ketoacidosis
- 27 E14.2 With renal complications
- 28 E14.3 With ophthalmic complications
- 29 E14.4 With neurological complications
- 30 E14.5 With peripheral circulatory complications
- 31 E14.6 With other specified complications
- 32 E14.7 With multiple complications
- 33 E14.8 With unspecified complications
- 34 E14.9 Without complications
- 35 E15 Nondiabetic hypoglycaemic coma
- 36 E16.0 Drug-induced hypoglycaemia without coma
- 37 E16.1 Other hypoglycaemia
- 38 E16.2 Hypoglycaemia, unspecified
- 39 E16.3 Increased secretion of glucagon
- 40 E16.4 Abnormal secretion of gastrin
- 41 E16.8 Other specified disorders of pancreatic internal secretion
- 42 E16.9 Disorder of pancreatic internal secretion, unspecified
- 43 E20.0 Idiopathic hypoparathyroidism
- 44 E20.1 Pseudohypoparathyroidism
- 45 E20.8 Other hypoparathyroidism
- 46 E20.9 Hypoparathyroidism, unspecified

- 1 E21.0 Primary hyperparathyroidism
- 2
- 3 E21.1 Secondary hyperparathyroidism, not elsewhere classified
- 4
- 5 E21.2 Other hyperparathyroidism
- 6
- 7 E21.3 Hyperparathyroidism, unspecified
- 8
- 9 E21.4 Other specified disorders of parathyroid gland
- 10
- 11 E21.5 Disorder of parathyroid gland, unspecified
- 12
- 13 E22.0 Acromegaly and pituitary gigantism
- 14
- 15 E22.1 Hyperprolactinaemia
- 16
- 17 E22.2 Syndrome of inappropriate secretion of antidiuretic hormone
- 18
- 19 E22.8 Other hyperfunction of pituitary gland
- 20
- 21 E22.9 Hyperfunction of pituitary gland, unspecified
- 22
- 23 E23.0 Hypopituitarism
- 24
- 25 E23.1 Drug-induced hypopituitarism
- 26
- 27 E23.2 Diabetes insipidus
- 28
- 29 E23.3 Hypothalamic dysfunction, not elsewhere classified
- 30
- 31 E23.6 Other disorders of pituitary gland
- 32
- 33 E23.7 Disorder of pituitary gland, unspecified
- 34
- 35 E24.0 Pituitary-dependent Cushing's disease
- 36
- 37 E24.1 Nelson's syndrome
- 38
- 39 E24.2 Drug-induced Cushing's syndrome
- 40
- 41 E24.3 Ectopic ACTH syndrome
- 42
- 43 E24.4 Alcohol-induced pseudo-Cushing's syndrome
- 44
- 45 E24.8 Other Cushing's syndrome
- 46
- 47 E24.9 Cushing's syndrome, unspecified
- 48
- 49 E25.0 Congenital adrenogenital disorders associated with enzyme deficiency
- 50
- 51 E25.8 Other adrenogenital disorders
- 52
- 53 E25.9 Adrenogenital disorder, unspecified
- 54
- 55 E27.0 Other adrenocortical overactivity
- 56
- 57 E27.1 Primary adrenocortical insufficiency
- 58
- 59 E27.2 Addisonian crisis
- 60
- E27.3 Drug-induced adrenocortical insufficiency
- E27.4 Other and unspecified adrenocortical insufficiency
- E27.5 Adrenomedullary hyperfunction
- E27.8 Other specified disorders of adrenal gland
- E27.9 Disorder of adrenal gland, unspecified
- E28.1 Androgen excess
- E28.2 Polycystic ovarian syndrome
- E28.3 Primary ovarian failure
- E28.8 Other ovarian dysfunction
- E28.9 Ovarian dysfunction, unspecified
- E29.0 Testicular hyperfunction
- E29.1 Testicular hypofunction
- E29.8 Other testicular dysfunction
- E29.9 Testicular dysfunction, unspecified
- E35.1 Disorders of adrenal glands in diseases classified elsewhere
- E34.0 Carcinoid syndrome



| Field ID | Description                                                          |
|----------|----------------------------------------------------------------------|
| 25010    | Volume of brain, grey+white matter                                   |
| 25008    | Volume of white matter                                               |
| 25006    | Volume of grey matter                                                |
| 25002    | Volume of peripheral cortical grey matter                            |
| 25004    | Volume of ventricular cerebrospinal fluid                            |
| 25888    | Volume of grey matter in Amygdala (left)                             |
| 25889    | Volume of grey matter in Amygdala (right)                            |
| 25880    | Volume of grey matter in Caudate (left)                              |
| 25881    | Volume of grey matter in Caudate (right)                             |
| 25838    | Volume of grey matter in Cingulate Gyrus, anterior division (left)   |
| 25839    | Volume of grey matter in Cingulate Gyrus, anterior division (right)  |
| 25840    | Volume of grey matter in Cingulate Gyrus, posterior division (left)  |
| 25841    | Volume of grey matter in Cingulate Gyrus, posterior division (right) |
| 25886    | Volume of grey matter in Hippocampus (left)                          |
| 25887    | Volume of grey matter in Hippocampus (right)                         |
| 25784    | Volume of grey matter in Insular Cortex (left)                       |
| 25785    | Volume of grey matter in Insular Cortex (right)                      |
| 25788    | Volume of grey matter in Middle Frontal Gyrus (left)                 |
| 25789    | Volume of grey matter in Middle Frontal Gyrus (right)                |
| 25844    | Volume of grey matter in Cuneal Cortex (left)                        |
| 25845    | Volume of grey matter in Cuneal Cortex (right)                       |
| 25842    | Volume of grey matter in Precuneous Cortex (left)                    |
| 25843    | Volume of grey matter in Precuneous Cortex (right)                   |
| 25900    | Volume of grey matter in Crus I Cerebellum (left)                    |
| 25902    | Volume of grey matter in Crus I Cerebellum (right)                   |
| 25901    | Volume of grey matter in Crus I Cerebellum (vermis)                  |
| 25903    | Volume of grey matter in Crus II Cerebellum (left)                   |
| 25905    | Volume of grey matter in Crus II Cerebellum (right)                  |
| 25904    | Volume of grey matter in Crus II Cerebellum (vermis)                 |
| 25893    | Volume of grey matter in I-IV Cerebellum (left)                      |
| 25894    | Volume of grey matter in I-IV Cerebellum (right)                     |
| 25915    | Volume of grey matter in IX Cerebellum (left)                        |
| 25917    | Volume of grey matter in IX Cerebellum (right)                       |
| 25916    | Volume of grey matter in IX Cerebellum (vermis)                      |
| 25895    | Volume of grey matter in V Cerebellum (left)                         |
| 25896    | Volume of grey matter in V Cerebellum (right)                        |
| 25897    | Volume of grey matter in VI Cerebellum (left)                        |
| 25899    | Volume of grey matter in VI Cerebellum (right)                       |
| 25898    | Volume of grey matter in VI Cerebellum (vermis)                      |
| 25909    | Volume of grey matter in VIIla Cerebellum (left)                     |
| 25911    | Volume of grey matter in VIIla Cerebellum (right)                    |
| 25910    | Volume of grey matter in VIIla Cerebellum (vermis)                   |
| 25912    | Volume of grey matter in VIIlb Cerebellum (left)                     |
| 25914    | Volume of grey matter in VIIlb Cerebellum (right)                    |
| 25913    | Volume of grey matter in VIIlb Cerebellum (vermis)                   |

|    |                                                                                                   |
|----|---------------------------------------------------------------------------------------------------|
| 1  |                                                                                                   |
| 2  | 25906 Volume of grey matter in VIIb Cerebellum (left)                                             |
| 3  | 25908 Volume of grey matter in VIIb Cerebellum (right)                                            |
| 4  | 25907 Volume of grey matter in VIIb Cerebellum (vermis)                                           |
| 5  |                                                                                                   |
| 6  | 25890 Volume of grey matter in Ventral Striatum (left)                                            |
| 7  | 25891 Volume of grey matter in Ventral Striatum (right)                                           |
| 8  |                                                                                                   |
| 9  | 25918 Volume of grey matter in X Cerebellum (left)                                                |
| 10 | 25919 Volume of grey matter in X Cerebellum (vermis)                                              |
| 11 | 25920 Volume of grey matter in X Cerebellum (right)                                               |
| 12 |                                                                                                   |
| 13 | 25023 Volume of accumbens (left)                                                                  |
| 14 | 25024 Volume of accumbens (right)                                                                 |
| 15 | 25021 Volume of amygdala (left)                                                                   |
| 16 | 25022 Volume of amygdala (right)                                                                  |
| 17 |                                                                                                   |
| 18 | 25013 Volume of caudate (left)                                                                    |
| 19 | 25014 Volume of caudate (right)                                                                   |
| 20 |                                                                                                   |
| 21 | 25019 Volume of hippocampus (left)                                                                |
| 22 | 25020 Volume of hippocampus (right)                                                               |
| 23 |                                                                                                   |
| 24 | 25017 Volume of pallidum (left)                                                                   |
| 25 | 25018 Volume of pallidum (right)                                                                  |
| 26 | 25015 Volume of putamen (left)                                                                    |
| 27 | 25016 Volume of putamen (right)                                                                   |
| 28 |                                                                                                   |
| 29 | 25011 Volume of thalamus (left)                                                                   |
| 30 | 25012 Volume of thalamus (right)                                                                  |
| 31 | 25059 Mean FA in body of corpus callosum on FA skeleton                                           |
| 32 | 25091 Mean FA in cingulum cingulate gyrus on FA skeleton (left)                                   |
| 33 | 25090 Mean FA in cingulum cingulate gyrus on FA skeleton (right)                                  |
| 34 |                                                                                                   |
| 35 | 25093 Mean FA in cingulum hippocampus on FA skeleton (left)                                       |
| 36 | 25092 Mean FA in cingulum hippocampus on FA skeleton (right)                                      |
| 37 |                                                                                                   |
| 38 | 25058 Mean FA in genu of corpus callosum on FA skeleton                                           |
| 39 | 25060 Mean FA in splenium of corpus callosum on FA skeleton                                       |
| 40 | 25101 Mean FA in uncinate fasciculus on FA skeleton (left)                                        |
| 41 | 25100 Mean FA in uncinate fasciculus on FA skeleton (right)                                       |
| 42 |                                                                                                   |
| 43 | 25107 Mean MD in body of corpus callosum on FA skeleton                                           |
| 44 | 25139 Mean MD in cingulum cingulate gyrus on FA skeleton (left)                                   |
| 45 | 25138 Mean MD in cingulum cingulate gyrus on FA skeleton (right)                                  |
| 46 |                                                                                                   |
| 47 | 25141 Mean MD in cingulum hippocampus on FA skeleton (left)                                       |
| 48 | 25140 Mean MD in cingulum hippocampus on FA skeleton (right)                                      |
| 49 |                                                                                                   |
| 50 | 25106 Mean MD in genu of corpus callosum on FA skeleton                                           |
| 51 | 25108 Mean MD in splenium of corpus callosum on FA skeleton                                       |
| 52 | 25149 Mean MD in uncinate fasciculus on FA skeleton (left)                                        |
| 53 | 25148 Mean MD in uncinate fasciculus on FA skeleton (right)                                       |
| 54 |                                                                                                   |
| 55 |                                                                                                   |
| 56 |                                                                                                   |
| 57 |                                                                                                   |
| 58 | For the calculation of the global FA and global MD values, all available mean FA and mean MD were |
| 59 |                                                                                                   |
| 60 |                                                                                                   |

|                 |                    |
|-----------------|--------------------|
| <b>Field ID</b> | <b>Description</b> |
|-----------------|--------------------|

|       |                                                          |
|-------|----------------------------------------------------------|
| 25079 | Mean FA in anterior corona radiata on FA skeleton (left) |
|-------|----------------------------------------------------------|

- 1
- 2 25078 Mean FA in anterior corona radiata on FA skeleton (right)
- 3 25073 Mean FA in anterior limb of internal capsule on FA skeleton (left)
- 4 25072 Mean FA in anterior limb of internal capsule on FA skeleton (right)
- 5
- 6 25059 Mean FA in body of corpus callosum on FA skeleton
- 7 25071 Mean FA in cerebral peduncle on FA skeleton (left)
- 8 25070 Mean FA in cerebral peduncle on FA skeleton (right)
- 9
- 10 25091 Mean FA in cingulum cingulate gyrus on FA skeleton (left)
- 11 25090 Mean FA in cingulum cingulate gyrus on FA skeleton (right)
- 12 25093 Mean FA in cingulum hippocampus on FA skeleton (left)
- 13 25092 Mean FA in cingulum hippocampus on FA skeleton (right)
- 14
- 15 25063 Mean FA in corticospinal tract on FA skeleton (left)
- 16 25062 Mean FA in corticospinal tract on FA skeleton (right)
- 17
- 18 25089 Mean FA in external capsule on FA skeleton (left)
- 19 25088 Mean FA in external capsule on FA skeleton (right)
- 20 25095 Mean FA in fornix cres+stria terminalis on FA skeleton (left)
- 21 25094 Mean FA in fornix cres+stria terminalis on FA skeleton (right)
- 22
- 23 25061 Mean FA in fornix on FA skeleton
- 24 25058 Mean FA in genu of corpus callosum on FA skeleton
- 25 25067 Mean FA in inferior cerebellar peduncle on FA skeleton (left)
- 26 25066 Mean FA in inferior cerebellar peduncle on FA skeleton (right)
- 27
- 28 25065 Mean FA in medial lemniscus on FA skeleton (left)
- 29 25064 Mean FA in medial lemniscus on FA skeleton (right)
- 30
- 31 25056 Mean FA in middle cerebellar peduncle on FA skeleton
- 32 25057 Mean FA in pontine crossing tract on FA skeleton
- 33 25083 Mean FA in posterior corona radiata on FA skeleton (left)
- 34 25082 Mean FA in posterior corona radiata on FA skeleton (right)
- 35 25075 Mean FA in posterior limb of internal capsule on FA skeleton (left)
- 36 25074 Mean FA in posterior limb of internal capsule on FA skeleton (right)
- 37
- 38 25085 Mean FA in posterior thalamic radiation on FA skeleton (left)
- 39 25084 Mean FA in posterior thalamic radiation on FA skeleton (right)
- 40 25077 Mean FA in retrolenticular part of internal capsule on FA skeleton (left)
- 41 25076 Mean FA in retrolenticular part of internal capsule on FA skeleton (right)
- 42
- 43 25087 Mean FA in sagittal stratum on FA skeleton (left)
- 44 25086 Mean FA in sagittal stratum on FA skeleton (right)
- 45
- 46 25060 Mean FA in splenium of corpus callosum on FA skeleton
- 47 25069 Mean FA in superior cerebellar peduncle on FA skeleton (left)
- 48 25068 Mean FA in superior cerebellar peduncle on FA skeleton (right)
- 49
- 50 25081 Mean FA in superior corona radiata on FA skeleton (left)
- 51 25080 Mean FA in superior corona radiata on FA skeleton (right)
- 52 25099 Mean FA in superior fronto-occipital fasciculus on FA skeleton (left)
- 53 25098 Mean FA in superior fronto-occipital fasciculus on FA skeleton (right)
- 54 25097 Mean FA in superior longitudinal fasciculus on FA skeleton (left)
- 55 25096 Mean FA in superior longitudinal fasciculus on FA skeleton (right)
- 56
- 57 25103 Mean FA in tapetum on FA skeleton (left)
- 58 25102 Mean FA in tapetum on FA skeleton (right)
- 59 25101 Mean FA in uncinata fasciculus on FA skeleton (left)
- 60

1  
2 25100 Mean FA in uncinate fasciculus on FA skeleton (right)  
3 25127 Mean MD in anterior corona radiata on FA skeleton (left)  
4 25126 Mean MD in anterior corona radiata on FA skeleton (right)  
5 25121 Mean MD in anterior limb of internal capsule on FA skeleton (left)  
6 25120 Mean MD in anterior limb of internal capsule on FA skeleton (right)  
7 25107 Mean MD in body of corpus callosum on FA skeleton  
8 25119 Mean MD in cerebral peduncle on FA skeleton (left)  
9 25118 Mean MD in cerebral peduncle on FA skeleton (right)  
10 25139 Mean MD in cingulum cingulate gyrus on FA skeleton (left)  
11 25138 Mean MD in cingulum cingulate gyrus on FA skeleton (right)  
12 25141 Mean MD in cingulum hippocampus on FA skeleton (left)  
13 25140 Mean MD in cingulum hippocampus on FA skeleton (right)  
14 25111 Mean MD in corticospinal tract on FA skeleton (left)  
15 25110 Mean MD in corticospinal tract on FA skeleton (right)  
16 25137 Mean MD in external capsule on FA skeleton (left)  
17 25136 Mean MD in external capsule on FA skeleton (right)  
18 25143 Mean MD in fornix cres+stria terminalis on FA skeleton (left)  
19 25142 Mean MD in fornix cres+stria terminalis on FA skeleton (right)  
20 25109 Mean MD in fornix on FA skeleton  
21 25106 Mean MD in genu of corpus callosum on FA skeleton  
22 25115 Mean MD in inferior cerebellar peduncle on FA skeleton (left)  
23 25114 Mean MD in inferior cerebellar peduncle on FA skeleton (right)  
24 25113 Mean MD in medial lemniscus on FA skeleton (left)  
25 25112 Mean MD in medial lemniscus on FA skeleton (right)  
26 25104 Mean MD in middle cerebellar peduncle on FA skeleton  
27 25105 Mean MD in pontine crossing tract on FA skeleton  
28 25131 Mean MD in posterior corona radiata on FA skeleton (left)  
29 25130 Mean MD in posterior corona radiata on FA skeleton (right)  
30 25123 Mean MD in posterior limb of internal capsule on FA skeleton (left)  
31 25122 Mean MD in posterior limb of internal capsule on FA skeleton (right)  
32 25133 Mean MD in posterior thalamic radiation on FA skeleton (left)  
33 25132 Mean MD in posterior thalamic radiation on FA skeleton (right)  
34 25125 Mean MD in retrolenticular part of internal capsule on FA skeleton (left)  
35 25124 Mean MD in retrolenticular part of internal capsule on FA skeleton (right)  
36 25135 Mean MD in sagittal stratum on FA skeleton (left)  
37 25134 Mean MD in sagittal stratum on FA skeleton (right)  
38 25108 Mean MD in splenium of corpus callosum on FA skeleton  
39 25117 Mean MD in superior cerebellar peduncle on FA skeleton (left)  
40 25116 Mean MD in superior cerebellar peduncle on FA skeleton (right)  
41 25129 Mean MD in superior corona radiata on FA skeleton (left)  
42 25128 Mean MD in superior corona radiata on FA skeleton (right)  
43 25147 Mean MD in superior fronto-occipital fasciculus on FA skeleton (left)  
44 25146 Mean MD in superior fronto-occipital fasciculus on FA skeleton (right)  
45 25145 Mean MD in superior longitudinal fasciculus on FA skeleton (left)  
46 25144 Mean MD in superior longitudinal fasciculus on FA skeleton (right)  
47 25151 Mean MD in tapetum on FA skeleton (left)

1  
2  
3  
4  
5  
6  
7  
8  
9  
10  
11  
12  
13  
14  
15  
16  
17  
18  
19  
20  
21  
22  
23  
24  
25  
26  
27  
28  
29  
30  
31  
32  
33  
34  
35  
36  
37  
38  
39  
40  
41  
42  
43  
44  
45  
46  
47  
48  
49  
50  
51  
52  
53  
54  
55  
56  
57  
58  
59  
60

25150 Mean MD in tapetum on FA skeleton (right)  
25149 Mean MD in uncinata fasciculus on FA skeleton (left)  
25148 Mean MD in uncinata fasciculus on FA skeleton (right)

For peer review only

1  
2  
3  
4  
5  
6  
7  
8  
9  
10  
11  
12  
13  
14  
15  
16  
17  
18  
19  
20  
21  
22  
23  
24  
25  
26  
27  
28  
29  
30  
31  
32  
33  
34  
35  
36  
37  
38  
39  
40  
41  
42  
43  
44  
45  
46  
47  
48  
49  
50  
51  
52  
53  
54  
55  
56  
57  
58  
59  
60

For peer review only

1  
2  
3  
4  
5  
6  
7  
8  
9  
10  
11  
12  
13  
14  
15  
16  
17  
18  
19  
20  
21  
22  
23  
24  
25  
26  
27  
28  
29  
30  
31  
32  
33  
34  
35  
36  
37  
38  
39  
40  
41  
42  
43  
44  
45  
46  
47  
48  
49  
50  
51  
52  
53  
54  
55  
56  
57  
58  
59  
60

For peer review only

averaged, respectively:

| Field ID | Description                                                               |
|----------|---------------------------------------------------------------------------|
| 20023    | Mean time to correctly identify matches (Reaction time)                   |
| 20016    | Fluid intelligence score (Fluid intelligence)                             |
| 6348     | Duration to complete numeric path (trail #1) (Trail making A)             |
| 6350     | Duration to complete alphanumeric path (trail #2) (Trail making B)        |
| 23324    | Number of symbol digit matches made correctly (Symbol digit substitution) |
| 4282     | Maximum digits remembered correctly (Digit span)                          |

For peer review only



1  
2  
3  
4  
5  
6  
7  
8  
9  
10  
11  
12  
13  
14  
15  
16  
17  
18  
19  
20  
21  
22  
23  
24  
25  
26  
27  
28  
29  
30  
31  
32  
33  
34  
35  
36  
37  
38  
39  
40  
41  
42  
43  
44  
45  
46  
47  
48  
49  
50  
51  
52  
53  
54  
55  
56  
57  
58  
59  
60

| <b>Field ID</b> | <b>Description</b>                                      |
|-----------------|---------------------------------------------------------|
| 2050            | Frequency of depressed mood in last 2 weeks             |
| 2060            | Frequency of unenthusiasm / disinterest in last 2 weeks |
| 2070            | Frequency of tenseness / restlessness in last 2 weeks   |
| 2080            | Frequency of tiredness / lethargy in last 2 weeks       |

For peer review only

| Field ID | Description                                                                    |
|----------|--------------------------------------------------------------------------------|
| 31       | Sex                                                                            |
| 21003    | Age when attended assessment center                                            |
| 6138     | Qualifications (education)                                                     |
| 20116    | Smoking status                                                                 |
| 53       | Year of imaging                                                                |
| 54       | Assessment center                                                              |
| 25756    | Scanner lateral (X) brain position                                             |
| 25757    | Scanner transverse (Y) brain position                                          |
| 25758    | Scanner longitudinal (Z) brain position                                        |
| 25759    | Scanner table position                                                         |
| 25000    | Volumetric scaling from T1 head image to standard space (measure of head size) |
| 23104    | Body mass index measured by body impedance                                     |
| 23099    | Total body fat percentage measured by body impedance                           |

**Supplement 2.** Structural or diffusion MRI studies in patients with Cushing disease or exogenous glucocorticoid use

|                    | <b>Cohort</b>                                                                                                                           | <b>Imaging modality</b> | <b>Findings</b>                                                                                                                                                                                                                                                                                                                        |
|--------------------|-----------------------------------------------------------------------------------------------------------------------------------------|-------------------------|----------------------------------------------------------------------------------------------------------------------------------------------------------------------------------------------------------------------------------------------------------------------------------------------------------------------------------------|
| <b>Cushing</b>     |                                                                                                                                         |                         |                                                                                                                                                                                                                                                                                                                                        |
| Andela 2013 [1]    | 25 CD patients with long-term remission, 25 healthy controls                                                                            | Volumetric MRI          | Patients had reduced GMV in ACC and increased GMV in left posterior lobe of cerebellum. Patients reported more psychological and cognitive symptoms than controls, but these were not associated with GMV changes.                                                                                                                     |
| Bauduin 2020 [2]   | 25 CD patients with long-term remission, 25 healthy controls                                                                            | Volumetric MRI          | Patients had reduced cortical thickness in left caudal ACC, right rostral ACC, left cuneus, left PCC, and bilateral precuneus. Cortical thickness in left caudal ACC and left cuneus were inversely associated with anxiety, depressive symptoms, and disease duration.                                                                |
| Bourdeau 2002 [3]  | 38 patients with active CS (21 with CD 17 with adrenal CS), 18 patients with other non-ACTH-secreting sellar tumors, 20 normal controls | Volumetric MRI          | Overall loss of brain volume and increased ventricle diameters in CS patients. Re-imaging in 22 CS patients at 40 months after correction of hypercortisolism showed a decrease in ventricle diameters and increase in brain volume compared to active disease.                                                                        |
| Burkhardt 2015 [4] | 19 patients with active untreated CD, 40 healthy controls                                                                               | Volumetric MRI          | CD patients had reduced GMV in hippocampus and cerebellum compared to controls.                                                                                                                                                                                                                                                        |
| Chen 2020 [5]      | 101 patients with active untreated CD, and 95 patients with NFA (controls)                                                              | Volumetric MRI          | CD patients had more cortical and subcortical atrophy, more white matter hyperintensities, and decreased hippocampal height. Follow-up of 14 CD patients showed partial reversion of brain atrophy and white matter hyperintensities after correction of hypercortisolism.                                                             |
| Crespo 2014 [6]    | 35 patients with CS (27 cured, 8 medically treated), 35 controls                                                                        | Volumetric MRI          | No differences were found between cured and treated CS patients. Patients had decreased cortical thickness in the left superior frontal cortex, precentral cortex, left insular cortex, left and right rostral ACC, and right caudal middle frontal cortex compared to controls. Patients also had altered decision-making strategies. |
| Hou [7]            | 50 patients with active CD, 36 healthy controls                                                                                         | Volumetric MRI          | Patients had reductions in total GMV and frontal, parietal, occipital, and temporal lobes; insula; cingulate lobe; and enlargement of lateral and third ventricles. All affected brain regions improved significantly after TSS. No differences in volume of hippocampus or amygdala.                                                  |
| Jiang 2017 [8]     | 34 patients with CD (14 with short-term remission, 20 with active CD), 34 controls                                                      | Volumetric MRI          | Remitted CD patients had greater GMV in bilateral caudate; no differences in GMV of MFG or cerebellum compared to controls. Active CD patients had smaller GMV in MFG and cerebellum compared to controls and remitted patients.                                                                                                       |
| Jiang 2017 [9]     | 15 patients with active CD, 15 healthy controls                                                                                         | DKI                     | White matter: increased MD in the splenium of the corpus callosum, bilateral frontal lobe, and left temporal lobe. AD was mainly increased in the bilateral                                                                                                                                                                            |

|                   |                                                                                                                           |                       |                                                                                                                                                                                                                                                                                                                                                                                                                                                                                                                                                                                                                                                    |
|-------------------|---------------------------------------------------------------------------------------------------------------------------|-----------------------|----------------------------------------------------------------------------------------------------------------------------------------------------------------------------------------------------------------------------------------------------------------------------------------------------------------------------------------------------------------------------------------------------------------------------------------------------------------------------------------------------------------------------------------------------------------------------------------------------------------------------------------------------|
|                   |                                                                                                                           |                       | frontal lobe, and RD mainly in the left temporal lobe. FA was mainly decreased in the splenium of the corpus callosum and the left temporal lobe.<br>Gray matter: increased MD, RD, and AD in the left hippocampus/parahippocampal gyrus and the left temporal lobe, increased radial kurtosis in the right cerebellar hemisphere, decreased axial kurtosis in the left frontal lobe and decreased mean kurtosis in left cerebellar hemisphere.                                                                                                                                                                                                    |
| Merke 2005 [10]   | 11 pediatric patients with active CS, 10 healthy controls                                                                 | Volumetric MRI        | CD patients had smaller cerebral volumes, larger ventricles, and a smaller amygdala. One year after surgical cure, cerebral atrophy was reversed, but children showed a decline in IQ and school performance.                                                                                                                                                                                                                                                                                                                                                                                                                                      |
| Momose 1971 [11]  | 31 patients with active CD, 64 patients with acromegaly, 36 patients with chromophobe adenoma                             | Pneumoencephalography | Cerebral cortical atrophy was present in 90% and cerebellar cortical atrophy in 74% of patients with CD. In controls with acromegaly, this was 30% and 3%, respectively. In controls with a chromophobe adenoma, this was 58% and 20%, respectively.                                                                                                                                                                                                                                                                                                                                                                                               |
| Pires 2015 [12]   | 35 patients with CS (8 active hypercortisolism, 7 medication-remitted cortisol, 20 surgically cured), 35 healthy controls | DTI                   | Patients had widespread alteration in white matter integrity (increased FA, decreased MD, RD, AD) compared to controls. Both active and cured CS patients showed increased FA, and decreased MD, RD, and AD; medically treated CS patients did not have significantly different AD values.                                                                                                                                                                                                                                                                                                                                                         |
| Pires 2017 [13]   | 35 patients with CS (8 active hypercortisolism, 7 medication-remitted cortisol, 20 surgically cured), 35 healthy controls | DTI                   | All patient groups had more depression and anxiety than controls. Depression scores correlated negatively to FA (in right corticospinal tract (CST), forceps major, forceps minor, left inferior fronto-occipital fasciculus (IFOF) (frontal part), right IFOF, right inferior longitudinal fasciculus (ILF), left superior longitudinal fasciculus (SLF) (anterior part) and right SLF), and positively to RD values (in frontal regions of the forceps minor and frontal areas of bilateral IFOFs). Although processing speed did not differ between groups, Symbol Digit Modalities Test scores correlated positively to both FA and AD values. |
| Resmini 2012 [14] | 33 patients with CS (11 active, 22 cured), 34 controls                                                                    | Volumetric MRI        | Patients had reduced total and cortical brain gray matter volumes compared with controls. Subcortical gray matter (which includes hippocampal volume) was reduced only in 12 patients with severe memory impairment. No differences in hippocampal volume were reported between patients with active or cured CS.                                                                                                                                                                                                                                                                                                                                  |
| Santos 2014 [15]  | 36 patients with CS (15 active, 21 in remission), 36 controls                                                             | Volumetric MRI        | Patients with active CS had smaller cerebellar cortex volumes, and patients with remitted CS showed a similar trend. Cerebellar white matter volume showed no differences.                                                                                                                                                                                                                                                                                                                                                                                                                                                                         |
| Santos 2015 [16]  | 38 patients with CS (15 active, 23 in remission), 38 controls                                                             | Volumetric MRI        | Patients in remission had more white matter lesions than controls and active patients. Both CS groups had reduced total brain volume and GMV. No differences were found in white matter volume.                                                                                                                                                                                                                                                                                                                                                                                                                                                    |

|                         |                                                                                                                        |                |                                                                                                                                                                                                                                                                                                                                                                                                                                                                                                                                                                                                                                                                                                                                                                                                                                                                |
|-------------------------|------------------------------------------------------------------------------------------------------------------------|----------------|----------------------------------------------------------------------------------------------------------------------------------------------------------------------------------------------------------------------------------------------------------------------------------------------------------------------------------------------------------------------------------------------------------------------------------------------------------------------------------------------------------------------------------------------------------------------------------------------------------------------------------------------------------------------------------------------------------------------------------------------------------------------------------------------------------------------------------------------------------------|
| Santos 2017 [17]        | 39 patients with CS (16 active, 23 in remission), 39 healthy controls                                                  | Volumetric MRI | Active CS patients had smaller right amygdala volumes. Left amygdala volume was associated with depression and anxiety scores. No differences were found between patients in remission and controls.                                                                                                                                                                                                                                                                                                                                                                                                                                                                                                                                                                                                                                                           |
| Simmons 2000 [18]       | 63 patients with CD (all after surgical treatment), 63 controls with sellar pathology other than ACTH-secreting tumors | Volumetric MRI | CD patients had higher degrees of cerebral atrophy than controls.                                                                                                                                                                                                                                                                                                                                                                                                                                                                                                                                                                                                                                                                                                                                                                                              |
| Starkman 1992 [19]      | 12 patients with CS                                                                                                    | Volumetric MRI | For 27% of patients, hippocampal volume fell outside the 95% confidence interval of the population. Plasma cortisol was negatively correlated with hippocampal volume.                                                                                                                                                                                                                                                                                                                                                                                                                                                                                                                                                                                                                                                                                         |
| Starkman 1999 [20]      | 22 patients with active CD                                                                                             | Volumetric MRI | Sixteen months after TSS, hippocampus volume increased up to 10%, and a smaller increase was observed in caudate volume.                                                                                                                                                                                                                                                                                                                                                                                                                                                                                                                                                                                                                                                                                                                                       |
| Starkman 2003 [21]      | 24 patients with active CD                                                                                             | Volumetric MRI | Sixteen months after TSS, all patients showed an increase in hippocampal volume (which was significantly correlated with lower cortisol levels, and with one neuropsychological test), and 18 patients had an increase in caudate head volume.                                                                                                                                                                                                                                                                                                                                                                                                                                                                                                                                                                                                                 |
| Tirosch 2020 [22]       | 29 patients with CS (8 active, 21 recovering), 8 controls                                                              | Volumetric MRI | Patients with persistent disease had increased white matter volume and decreased cortex thickness and white matter intensity compared with patients achieving remission of CS, mainly in frontal and parietal lobes (but not FDR-corrected). Compared to healthy controls, patients recovering from CS had a decrease in subcortical GM volume, an increase in cortical thickness, and a decrease in white matter volume in multiple sites (including accumbens). In all patients together, 24h UFC correlated negatively with intensity in caudate, hippocampus, accumbens, and corpus callosum; correlated negatively with white matter intensity in frontal and parietal lobes; and positively with lateral ventricles volumes. Changes in 24h UFC correlated negatively with change in total brain volume, supratentorium, cerebellar cortex, and putamen. |
| Toffanin 2011 [23]      | 10 patients with active CD                                                                                             | Volumetric MRI | After TSS, the volume of the hippocampal head increased significantly, but no change in hippocampal body or tail, nor in whole brain volume was observed.                                                                                                                                                                                                                                                                                                                                                                                                                                                                                                                                                                                                                                                                                                      |
| Van der Werff 2014 [24] | 22 patients with long-term remission of CD, 22 healthy controls                                                        | DTI            | Patients had widespread FA reductions in whole brain analysis. ROI analysis revealed reduced FA in the bilateral cingulate cingulum, bilateral uncinate fasciculus and corpus callosum. No significant differences were found in tracts in the inferior parts of the brainstem, the white matter in the bilateral cerebellum, the bilateral hippocampal cingulum, the left inferior fronto-occipital fasciculus, and parts of the bilateral superior longitudinal fasciculus. Patients also had increased radial and mean diffusivity, but no difference in axial diffusivity.                                                                                                                                                                                                                                                                                 |

| Exogenous GC      |                                                                                                                                                                                                                         |                      |                                                                                                                                                                                                                                                                                                                                                                       |
|-------------------|-------------------------------------------------------------------------------------------------------------------------------------------------------------------------------------------------------------------------|----------------------|-----------------------------------------------------------------------------------------------------------------------------------------------------------------------------------------------------------------------------------------------------------------------------------------------------------------------------------------------------------------------|
| Bentson 1978 [25] | 15 long-term GC users                                                                                                                                                                                                   | CT                   | Patients showed varying degrees of apparent cerebral atrophy. Some correlation between dosage and degree of atrophy appeared to be present.                                                                                                                                                                                                                           |
| Brown 2004 [26]   | 17 chronic (>6 months) GC (prednisone) users, 15 controls                                                                                                                                                               | Volumetric MRI, PMRS | GC users had smaller hippocampal volume, lower N-acetyl aspartate ratios, more mood symptoms and poorer cognitive function.                                                                                                                                                                                                                                           |
| Brown 2015 [27]   | 17 healthy adults who received hydrocortisone (160 mg/day)/placebo, phenytoin/placebo, hydrocortisone/phenytoin, or placebo/placebo, in a randomized, blinded, cross-over trial with 21-day washout between conditions. | Volumetric MRI       | Hydrocortisone use was not associated with difference in total brain volume but was associated with a 1.69% reduction in total hippocampal volume compared to placebo. Phenytoin blocked this hippocampal volume reduction by hydrocortisone.                                                                                                                         |
| Brown 2019 [28]   | 46 chronic GC users, randomized to memantine or placebo in blinded, cross-over trial (two 24-week treatment periods, separated by four-week washout)                                                                    | Volumetric MRI       | Hippocampal volume decreased significantly from baseline to week 52 and from week 24 to week 52, without significant difference between baseline and week 24. Following 24 weeks of memantine, left dentate gyrus/CA3 volume was significantly larger than after placebo; a similar trend was observed in the right CA1. Subiculum showed no significant differences. |
| Brown 2008 [29]   | 15 chronic (>6 months) GC (prednisone) users, 13 controls                                                                                                                                                               | Volumetric MRI       | GC users had significantly smaller amygdala volumes compared to controls. Duration of GC therapy correlated negatively with right amygdala volume.                                                                                                                                                                                                                    |
| Desai 2009 [30]   | 28 chronic (>6 months) GC (prednisone) users, randomized to 24 weeks of lamotrigine (n = 16) or placebo (n = 12) in blinded trial                                                                                       | Volumetric MRI       | After 24 weeks, amygdala volume was reduced in both groups, but right amygdala volume was significantly less reduced in the lamotrigine group than in the placebo group.                                                                                                                                                                                              |
| Nguyn 2019 [31]   | 81 chronic (>6 months) GC (prednisone) users                                                                                                                                                                            | Volumetric MRI       | Cumulative GC exposure negatively associated with the volumes of the left and right hippocampal dentate gyrus/CA3; no associations were found for entorhinal, perirhinal, or parahippocampal gyri, subiculum, or CA1.                                                                                                                                                 |

AD, axial diffusivity; ACC, anterior cingulate cortex; CD, Cushing disease; CS, Cushing syndrome; CT, computed tomography; FA, fractional anisotropy; DKI, diffusional kurtosis imaging; DMN, default mode network; GC, glucocorticoids; GMV, grey matter volume; MD, mean diffusivity; MFG, medial frontal gyrus; NFA, non-functioning pituitary adenoma; PCC, posterior cingulate cortex; PMRS, proton magnetic resonance spectroscopy; RD, radial diffusivity; RSFC, resting-state functional connectivity; TSS, transsphenoidal surgery; 24h UFC, 24-hour urinary free cortisol.

## References

1. Andela, C.D., van der Werff, S.J., Pannekoek, J.N., van den Berg, S.M., Meijer, O.C., van Buchem, M.A., Rombouts, S.A., van der Mast, R.C., Romijn, J.A., Tiemensma, J., Biermasz, N.R., van der Wee, N.J., Pereira, A.M.: Smaller grey matter volumes in the anterior cingulate cortex and greater cerebellar volumes in patients with long-term remission of Cushing's disease: a case-control study. *Eur J Endocrinol* **169**(6), 811-819 (2013). doi:10.1530/eje-13-0471
2. Bauduin, S., van der Pal, Z., Pereira, A.M., Meijer, O.C., Giltay, E.J., van der Wee, N.J.A., van der Werff, S.J.A.: Cortical thickness abnormalities in long-term remitted Cushing's disease. *Transl Psychiatry* **10**(1), 293 (2020). doi:10.1038/s41398-020-00980-6
3. Bourdeau, I., Bard, C., Noël, B., Leclerc, I., Cordeau, M.P., Bélair, M., Lesage, J., Lafontaine, L., Lacroix, A.: Loss of brain volume in endogenous Cushing's syndrome and its reversibility after correction of hypercortisolism. *J Clin Endocrinol Metab* **87**(5), 1949-1954 (2002). doi:10.1210/jcem.87.5.8493
4. Burkhardt, T., Lüdecke, D., Spies, L., Wittmann, L., Westphal, M., Flitsch, J.: Hippocampal and cerebellar atrophy in patients with Cushing's disease. *Neurosurg Focus* **39**(5), E5 (2015). doi:10.3171/2015.8.Focus15324
5. Chen, Y., Zhang, J., Tan, H., Li, J., Yu, Y.: Detrimental effects of hypercortisolism on brain structure and related risk factors. *Sci Rep* **10**(1), 12708 (2020). doi:10.1038/s41598-020-68166-0
6. Crespo, I., Esther, G.M., Santos, A., Valassi, E., Yolanda, V.G., De Juan-Delago, M., Webb, S.M., Gómez-Ansón, B., Resmini, E.: Impaired decision-making and selective cortical frontal thinning in Cushing's syndrome. *Clinical endocrinology* **81**(6), 826-833 (2014).
7. Hou, B., Gao, L., Shi, L., Luo, Y., Guo, X., Young, G.S., Qin, L., Zhu, H., Lu, L., Wang, Z., Feng, M., Bao, X., Wang, R., Xing, B., Feng, F.: Reversibility of impaired brain structures after transsphenoidal surgery in Cushing's disease: a longitudinal study based on an artificial intelligence-assisted tool. *J Neurosurg*, 1-10 (2020). doi:10.3171/2019.10.Jns191400
8. Jiang, H., Ren, J., He, N.Y., Liu, C., Sun, Y.H., Jian, F.F., Bian, L.G., Shen, J.K., Yan, F.H., Pan, S.J., Sun, Q.F.: Volumetric magnetic resonance imaging analysis in patients with short-term remission of Cushing's disease. *Clin Endocrinol (Oxf)* **87**(4), 367-374 (2017). doi:10.1111/cen.13381
9. Jiang, H., He, N.Y., Sun, Y.H., Jian, F.F., Bian, L.G., Shen, J.K., Yan, F.H., Pan, S.J., Sun, Q.F.: Altered gray and white matter microstructure in Cushing's disease: A diffusional kurtosis imaging study. *Brain Res* **1665**, 80-87 (2017). doi:10.1016/j.brainres.2017.04.007
10. Merke, D.P., Giedd, J.N., Keil, M.F., Mehlinger, S.L., Wiggs, E.A., Holzer, S., Rawson, E., Vaituzis, A.C., Stratakis, C.A., Chrousos, G.P.: Children experience cognitive decline despite reversal of brain atrophy one year after resolution of Cushing syndrome. *J Clin Endocrinol Metab* **90**(5), 2531-2536 (2005). doi:10.1210/jc.2004-2488
11. Momose, K.J., Kjellberg, R.N., Kliman, B.: High incidence of cortical atrophy of the cerebral and cerebellar hemispheres in Cushing's disease. *Radiology* **99**(2), 341-348 (1971). doi:10.1148/99.2.341
12. Pires, P., Santos, A., Vives-Gilabert, Y., Webb, S.M., Sainz-Ruiz, A., Resmini, E., Crespo, I., de Juan-Delago, M., Gómez-Anson, B.: White matter alterations in the brains of patients with active, remitted, and cured cushing syndrome: a DTI study. *AJNR Am J Neuroradiol* **36**(6), 1043-1048 (2015). doi:10.3174/ajnr.A4322

13. Pires, P., Santos, A., Vives-Gilabert, Y., Webb, S.M., Sainz-Ruiz, A., Resmini, E., Crespo, I., de Juan-Delago, M., Gómez-Anson, B.: White matter involvement on DTI-MRI in Cushing's syndrome relates to mood disturbances and processing speed: a case-control study. *Pituitary* **20**(3), 340-348 (2017). doi:10.1007/s11102-017-0793-y
14. Resmini, E., Santos, A., Gómez-Anson, B., Vives, Y., Pires, P., Crespo, I., Portella, M.J., de Juan-Delago, M., Barahona, M.J., Webb, S.M.: Verbal and visual memory performance and hippocampal volumes, measured by 3-Tesla magnetic resonance imaging, in patients with Cushing's syndrome. *J Clin Endocrinol Metab* **97**(2), 663-671 (2012). doi:10.1210/jc.2011-2231
15. Santos, A., Resmini, E., Crespo, I., Pires, P., Vives-Gilabert, Y., Granell, E., Valassi, E., Gómez-Anson, B., Martínez-Momblán, M.A., Mataró, M., Webb, S.M.: Small cerebellar cortex volume in patients with active Cushing's syndrome. *Eur J Endocrinol* **171**(4), 461-469 (2014). doi:10.1530/eje-14-0371
16. Santos, A., Resmini, E., Gómez-Ansón, B., Crespo, I., Granell, E., Valassi, E., Pires, P., Vives-Gilabert, Y., Martínez-Momblán, M.A., de Juan, M., Mataró, M., Webb, S.M.: Cardiovascular risk and white matter lesions after endocrine control of Cushing's syndrome. *Eur J Endocrinol* **173**(6), 765-775 (2015). doi:10.1530/eje-15-0600
17. Santos, A., Granell, E., Gómez-Ansón, B., Crespo, I., Pires, P., Vives-Gilabert, Y., Valassi, E., Webb, S.M., Resmini, E.: Depression and Anxiety Scores Are Associated with Amygdala Volume in Cushing's Syndrome: Preliminary Study. *Biomed Res Int* **2017**, 2061935 (2017). doi:10.1155/2017/2061935
18. Simmons, N.E., Do, H.M., Lipper, M.H., Laws, E.R., Jr.: Cerebral atrophy in Cushing's disease. *Surg Neurol* **53**(1), 72-76 (2000). doi:10.1016/s0090-3019(99)00197-4
19. Starkman, M.N., Gebarski, S.S., Berent, S., Schteingart, D.E.: Hippocampal formation volume, memory dysfunction, and cortisol levels in patients with Cushing's syndrome. *Biological psychiatry* **32**(9), 756-765 (1992).
20. Starkman, M.N., Giordani, B., Gebarski, S.S., Berent, S., Schork, M.A., Schteingart, D.E.: Decrease in cortisol reverses human hippocampal atrophy following treatment of Cushing's disease. *Biol Psychiatry* **46**(12), 1595-1602 (1999). doi:10.1016/s0006-3223(99)00203-6
21. Starkman, M.N., Giordani, B., Gebarski, S.S., Schteingart, D.E.: Improvement in learning associated with increase in hippocampal formation volume. *Biol Psychiatry* **53**(3), 233-238 (2003). doi:10.1016/s0006-3223(02)01750-x
22. Tirosh, A., RaviPrakash, H., Papadakis, G.Z., Tatsi, C., Belyavskaya, E., Charalampos, L., Lodish, M.B., Bagci, U., Stratakis, C.A.: Computerized Analysis of Brain MRI Parameter Dynamics in Young Patients With Cushing Syndrome-A Case-Control Study. *J Clin Endocrinol Metab* **105**(5), e2069-2077 (2020). doi:10.1210/clinem/dgz303
23. Toffanin, T., Nifosi, F., Follador, H., Passamani, A., Zonta, F., Ferri, G., Scanarini, M., Amistà, P., Pigato, G., Scaroni, C., Mantero, F., Carollo, C., Perini, G.I.: Volumetric MRI analysis of hippocampal subregions in Cushing's disease: a model for glucocorticoid neural modulation. *Eur Psychiatry* **26**(1), 64-67 (2011). doi:10.1016/j.eurpsy.2010.09.003
24. van der Werff, S.J., Andela, C.D., Nienke Pannekoek, J., Meijer, O.C., van Buchem, M.A., Rombouts, S.A., van der Mast, R.C., Biermasz, N.R., Pereira, A.M., van der Wee, N.J.: Widespread reductions of white matter integrity in patients with long-term remission of Cushing's disease. *Neuroimage Clin* **4**, 659-667 (2014). doi:10.1016/j.nicl.2014.01.017
25. Bentson, J., Reza, M., Winter, J., Wilson, G.: Steroids and apparent cerebral atrophy on computed tomography scans. *J Comput Assist Tomogr* **2**(1), 16-23 (1978). doi:10.1097/00004728-197801000-00003



- 1  
2  
3 26. Brown, E.S., D, J.W., Frol, A., Bobadilla, L., Khan, D.A., Hanczyc, M., Rush, A.J., Fleckenstein, J., Babcock, E., Cullum, C.M.: Hippocampal volume,  
4 spectroscopy, cognition, and mood in patients receiving corticosteroid therapy. *Biol Psychiatry* **55**(5), 538-545 (2004).  
5 doi:10.1016/j.biopsych.2003.09.010  
6  
7 27. Brown, E.S., Jeon-Slaughter, H., Lu, H., Jamadar, R., Issac, S., Shad, M., Denniston, D., Tamminga, C., Nakamura, A., Thomas, B.P.: Hippocampal volume in  
8 healthy controls given 3-day stress doses of hydrocortisone. *Neuropsychopharmacology* **40**(5), 1216-1221 (2015). doi:10.1038/npp.2014.307  
9  
10 28. Brown, E.S., Kulikova, A., Van Enkevort, E., Nakamura, A., Ivleva, E.I., Tustison, N.J., Roberts, J., Yassa, M.A., Choi, C., Frol, A., Khan, D.A., Vazquez, M.,  
11 Holmes, T., Malone, K.: A randomized trial of an NMDA receptor antagonist for reversing corticosteroid effects on the human hippocampus.  
12 *Neuropsychopharmacology* **44**(13), 2263-2267 (2019). doi:10.1038/s41386-019-0430-8  
13  
14 29. Brown, E.S., Woolston, D.J., Frol, A.B.: Amygdala volume in patients receiving chronic corticosteroid therapy. *Biol Psychiatry* **63**(7), 705-709 (2008).  
15 doi:10.1016/j.biopsych.2007.09.014  
16  
17 30. Desai, S., Khanani, S., Shad, M.U., Brown, E.S.: Attenuation of amygdala atrophy with lamotrigine in patients receiving corticosteroid therapy. *J Clin*  
18 *Psychopharmacol* **29**(3), 284-287 (2009). doi:10.1097/JCP.0b013e3181a3e2a7  
19  
20 31. Nguyen, D.M., Yassa, M.A., Tustison, N.J., Roberts, J.M., Kulikova, A., Nakamura, A., Ivleva, E.I., Van Enkevort, E., Brown, E.S.: The Relationship Between  
21 Cumulative Exogenous Corticosteroid Exposure and Volumes of Hippocampal Subfields and Surrounding Structures. *J Clin Psychopharmacol* **39**(6),  
22 653-657 (2019). doi:10.1097/jcp.0000000000001120  
23  
24  
25  
26  
27  
28  
29  
30  
31  
32  
33  
34  
35  
36  
37  
38  
39  
40  
41  
42  
43  
44  
45  
46

| Abbreviation | Meaning                                   |
|--------------|-------------------------------------------|
| GC           | Glucocorticoids                           |
| FDR          | False discovery rate                      |
| Lower CI     | Lower end of the 95% confidence interval  |
| Upper        | Higher end of the 95% confidence interval |

For peer review only

1  
2 Post-hoc tests of demographic variables  
3  
4

5 **ANOVA of continuous demc**  
6

7

|                                                        |                            | <b>F value</b> | <b>P value</b> |
|--------------------------------------------------------|----------------------------|----------------|----------------|
| 8 <b><u>Main population</u></b>                        | <b>Age</b>                 | 13.0           | 2.4E-06        |
| 9                                                      | <b>BMI</b>                 | 5.8            | 2.9E-03        |
| 10                                                     | <b>Body fat percentage</b> | 15.3           | 2.2E-07        |
| 11                                                     |                            |                |                |
| 12                                                     |                            |                |                |
| 13                                                     |                            |                |                |
| 14 <b><u>Chronic users</u></b>                         | <b>Body fat percentage</b> | 7.7            | 4.6E-04        |
| 15                                                     |                            |                |                |
| 16                                                     |                            |                |                |
| 17 <b><u>Population without exclusion criteria</u></b> | <b>Age</b>                 | 21.8           | 3.6E-10        |
| 18                                                     | <b>BMI</b>                 | 8.4            | 2.2E-04        |
| 19                                                     | <b>Body fat percentage</b> | 14.4           | 5.5E-07        |
| 20                                                     |                            |                |                |
| 21                                                     |                            |                |                |
| 22                                                     |                            |                |                |
| 23                                                     |                            |                |                |
| 24                                                     |                            |                |                |
| 25                                                     |                            |                |                |
| 26                                                     |                            |                |                |
| 27                                                     |                            |                |                |
| 28                                                     |                            |                |                |
| 29                                                     |                            |                |                |
| 30                                                     |                            |                |                |
| 31                                                     |                            |                |                |
| 32                                                     |                            |                |                |
| 33                                                     |                            |                |                |
| 34                                                     |                            |                |                |
| 35                                                     |                            |                |                |
| 36                                                     |                            |                |                |
| 37                                                     |                            |                |                |
| 38                                                     |                            |                |                |
| 39                                                     |                            |                |                |
| 40                                                     |                            |                |                |
| 41                                                     |                            |                |                |
| 42                                                     |                            |                |                |
| 43                                                     |                            |                |                |
| 44                                                     |                            |                |                |
| 45                                                     |                            |                |                |
| 46                                                     |                            |                |                |
| 47                                                     |                            |                |                |
| 48                                                     |                            |                |                |
| 49                                                     |                            |                |                |
| 50                                                     |                            |                |                |
| 51                                                     |                            |                |                |
| 52                                                     |                            |                |                |
| 53                                                     |                            |                |                |
| 54                                                     |                            |                |                |
| 55                                                     |                            |                |                |
| 56                                                     |                            |                |                |
| 57                                                     |                            |                |                |
| 58                                                     |                            |                |                |
| 59                                                     |                            |                |                |
| 60                                                     |                            |                |                |

1  
2  
3  
4  
5  
6  
7  
8  
9  
10  
11  
12  
13  
14  
15  
16  
17  
18  
19  
20  
21  
22  
23  
24  
25  
26  
27  
28  
29  
30  
31  
32  
33  
34  
35  
36  
37  
38  
39  
40  
41  
42  
43  
44  
45  
46  
47  
48  
49  
50  
51  
52  
53  
54  
55  
56  
57  
58  
59  
60

**ographic variables**

**Post-hoc Dunnett's test**

**Oral GC vs. controls**

| <b>Estimate</b> | <b>Lower CI</b> | <b>Upper CI</b> | <b>P value</b>   |
|-----------------|-----------------|-----------------|------------------|
| 2.6             | 1.4             | 3.7             | <b>&lt;.0001</b> |
| 0.03            | -0.6            | 0.7             | 0.98             |
| 0.7             | -0.5            | 1.9             | 0.36             |
| -0.2            | -3.0            | 2.6             | 0.97             |
| 2.4             | 1.5             | 3.4             | <b>&lt;.0001</b> |
| 0.2             | -0.4            | 0.7             | 0.67             |
| 0.8             | -0.2            | 1.8             | 0.16             |

For peer review only

**Inhalation GC vs. controls**

| <b>Estimate</b> | <b>Lower CI</b> | <b>Upper CI</b> | <b>P value</b>   |
|-----------------|-----------------|-----------------|------------------|
| -0.2            | -0.9            | 0.5             | 0.81             |
| 0.6             | 0.2             | 1.0             | <b>0.0013</b>    |
| 1.9             | 1.1             | 2.7             | <b>&lt;.0001</b> |
| 1.8             | 0.8             | 2.9             | <b>0.0002</b>    |
| -0.9            | -1.5            | -0.3            | <b>0.0020</b>    |
| 0.6             | 0.3             | 1.0             | <b>0.0001</b>    |
| 1.5             | 0.9             | 2.2             | <b>&lt;.0001</b> |

## Primary comparison: oral GC vs. inhalation GC vs. controls

ANOVA of imaging parameters

|                                     | F value | P value | P_FDR          |
|-------------------------------------|---------|---------|----------------|
| <b>Volumetric measures</b>          |         |         |                |
| <b>Global volumes</b>               |         |         |                |
| Total brain volume                  | 19.7    | 2.8E-09 | <b>2.0E-08</b> |
| Grey matter volume                  | 23.7    | 5.4E-11 | <b>6.5E-10</b> |
| White matter volume                 | 6.7     | 1.2E-03 | <b>2.0E-03</b> |
| Peripheral cortex                   | 21.1    | 6.9E-10 | <b>6.2E-09</b> |
| CSF volume                          | 10.1    | 4.2E-05 | <b>9.5E-05</b> |
| <b>Subcortical volumes</b>          |         |         |                |
| Accumbens                           | 12.0    | 6.0E-06 | <b>1.7E-05</b> |
| Amygdala                            | 3.1     | 4.4E-02 | 5.4E-02        |
| Caudate                             | 6.7     | 1.3E-03 | <b>2.0E-03</b> |
| Hippocampus                         | 2.5     | 8.0E-02 | 8.7E-02        |
| Pallidum                            | 7.7     | 4.5E-04 | <b>7.8E-04</b> |
| Putamen                             | 10.9    | 1.8E-05 | <b>4.6E-05</b> |
| Thalamus                            | 8.2     | 2.7E-04 | <b>4.9E-04</b> |
| <b>Regional grey matter volumes</b> |         |         |                |
| Amygdala                            | 23.8    | 5.0E-11 | <b>6.5E-10</b> |
| Caudate                             | 13.0    | 2.3E-06 | <b>7.5E-06</b> |
| Cerebellum                          | 10.8    | 2.0E-05 | <b>4.8E-05</b> |
| Cingulate gyrus, anterior           | 2.6     | 7.4E-02 | 8.3E-02        |
| Cingulate gyrus, posterior          | 1.2     | 3.1E-01 | 3.2E-01        |
| Cuneal cortex                       | 2.4     | 9.1E-02 | 9.6E-02        |
| Hippocampus                         | 2.7     | 6.8E-02 | 7.9E-02        |
| Insular cortex                      | 8.5     | 2.0E-04 | <b>3.9E-04</b> |
| Medial frontal gyrus                | 0.5     | 6.1E-01 | 6.1E-01        |
| Precuneal cortex                    | 5.5     | 4.3E-03 | <b>5.6E-03</b> |
| <b>DTI measures</b>                 |         |         |                |
| <b>Fractional anisotropy</b>        |         |         |                |
| Global                              | 19.2    | 4.6E-09 | <b>2.8E-08</b> |
| Body of corpus callosum             | 10.0    | 4.7E-05 | <b>1.0E-04</b> |
| Genu of corpus callosum             | 16.8    | 5.3E-08 | <b>2.1E-07</b> |
| Splenium of corpus callosum         | 5.4     | 4.4E-03 | <b>5.6E-03</b> |
| Cingulum cingulate                  | 6.1     | 2.4E-03 | <b>3.4E-03</b> |
| Cingulum hippocampus                | 6.4     | 1.7E-03 | <b>2.5E-03</b> |
| Uncinate                            | 2.8     | 6.1E-02 | 7.3E-02        |
| <b>Mean diffusivity</b>             |         |         |                |
| Global                              | 25.9    | 5.8E-12 | <b>2.1E-10</b> |
| Body of corpus callosum             | 15.5    | 2.0E-07 | <b>7.0E-07</b> |
| Genu of corpus callosum             | 18.0    | 1.6E-08 | <b>7.0E-08</b> |
| Splenium of corpus callosum         | 9.7     | 6.2E-05 | <b>1.2E-04</b> |
| Cingulum cingulate                  | 5.4     | 4.3E-03 | <b>5.6E-03</b> |

1  
2  
3  
4  
5  
6  
7  
8  
9  
10  
11  
12  
13  
14  
15  
16  
17  
18  
19  
20  
21  
22  
23  
24  
25  
26  
27  
28  
29  
30  
31  
32  
33  
34  
35  
36  
37  
38  
39  
40  
41  
42  
43  
44  
45  
46  
47  
48  
49  
50  
51  
52  
53  
54  
55  
56  
57  
58  
59  
60

|                      |      |         |                |
|----------------------|------|---------|----------------|
| Cingulum hippocampus | 18.5 | 9.1E-09 | <b>4.7E-08</b> |
| Uncinate             | 12.1 | 5.4E-06 | <b>1.6E-05</b> |

For peer review only

**Post-hoc Dunnett's test****Oral GC vs. controls****Inhalation GC**

|  | Estimate | Lower CI | Upper CI | P value        | Estimate |
|--|----------|----------|----------|----------------|----------|
|  | -3688    | -10627   | 3252     | 0.39           | 3374     |
|  | -1968    | -5904    | 1968     | 0.44           | 1012     |
|  | -1720    | -6273    | 2833     | 0.61           | 2362     |
|  | -3303    | -6843    | 237      | 0.072          | 1033     |
|  | 1215     | -824     | 3254     | 0.32           | 78       |
|  | -13.1    | -26.7    | 0.5      | 0.062          | -6.5     |
|  | 77.8     | 24.5     | 131.1    | <b>0.0023</b>  | -2.7     |
|  | 0.8      | -29.9    | 31.4     | 1.00           | -18.0    |
|  | -31.3    | -98.2    | 35.6     | 0.48           | -27.9    |
|  | 3.6      | -74.0    | 81.1     | 0.99           | -6.4     |
|  | -4.0     | -31.9    | 23.8     | 0.91           | -23.9    |
|  | 178.7    | 82.2     | 275.0    | <b>1.0E-04</b> | 41.2     |
|  | 25.1     | -18.4    | 68.5     | 0.34           | -12.2    |
|  | -36.2    | -108.4   | 36.0     | 0.43           | 5.0      |
|  | -21.5    | -179.0   | 136.3    | 0.92           | -7.4     |
|  | -0.0037  | -0.0064  | -0.0010  | <b>0.0042</b>  | -0.0023  |
|  | -0.0043  | -0.0084  | -1.2E-04 | <b>0.043</b>   | -0.0023  |
|  | -0.0064  | -0.011   | -0.0017  | <b>0.005</b>   | -0.0019  |
|  | -0.0021  | -0.0053  | 0.0012   | 0.27           | -0.0032  |
|  | -0.0017  | -0.0062  | 0.0028   | 0.61           | -0.0028  |
|  | 6.5E-05  | -0.0046  | 0.0048   | 1.00           | -0.0034  |
|  | 7.2E-06  | 3.2E-06  | 1.1E-05  | <b>1.0E-04</b> | 2.7E-06  |
|  | 6.9E-06  | 1.7E-06  | 1.2E-05  | <b>6.0E-03</b> | 4.8E-06  |
|  | 8.4E-06  | 2.2E-06  | 1.5E-05  | <b>4.9E-03</b> | 4.1E-06  |
|  | 4.4E-06  | -3.8E-08 | 8.9E-06  | 5.2E-02        | 5.3E-06  |
|  | 2.9E-06  | -8.5E-07 | 6.6E-06  | 1.6E-01        | 2.8E-06  |



1  
2  
3  
4  
5  
6  
7  
8  
9  
10  
11  
12  
13  
14  
15  
16  
17  
18  
19  
20  
21  
22  
23  
24  
25  
26  
27  
28  
29  
30  
31  
32  
33  
34  
35  
36  
37  
38  
39  
40  
41  
42  
43  
44  
45  
46  
47  
48  
49  
50  
51  
52  
53  
54  
55  
56  
57  
58  
59  
60

|         |         |         |                |         |
|---------|---------|---------|----------------|---------|
| 5.0E-06 | 4.2E-07 | 9.5E-06 | <b>2.9E-02</b> | 5.6E-06 |
| 6.4E-06 | 2.2E-06 | 1.1E-05 | <b>1.4E-03</b> | 2.2E-06 |

For peer review only

vs. controls

|  | Lower CI | Upper CI | P value        |
|--|----------|----------|----------------|
|  | -1012    | 7760     | 0.16           |
|  | -1476    | 3500     | 0.57           |
|  | -516     | 5240     | 0.13           |
|  | -1205    | 3270     | 0.49           |
|  | -1211    | 1367     | 0.98           |
|  | -15.1    | 2.1      | 0.17           |
|  | -36.4    | 30.9     | 0.97           |
|  | -37.3    | 1.42     | 0.074          |
|  | -70.2    | 14.4     | 0.25           |
|  | -55.4    | 42.6     | 0.93           |
|  | -41.5    | -6.2     | <b>0.0052</b>  |
|  | -19.8    | 102.0    | 0.24           |
|  | -39.7    | 15.3     | 0.51           |
|  | -40.6    | 50.7     | 0.95           |
|  | -107.0   | 92.4     | 0.97           |
|  | -0.0040  | -5.7E-04 | <b>0.0057</b>  |
|  | -0.0049  | 3.0E-04  | 0.092          |
|  | -0.0049  | 0.0011   | 0.27           |
|  | -0.0052  | -0.0012  | <b>0.0010</b>  |
|  | -0.0057  | 8.9E-06  | 0.051          |
|  | -0.0063  | -3.8E-04 | <b>0.024</b>   |
|  | 1.7E-07  | 5.2E-06  | <b>3.4E-02</b> |
|  | 1.6E-06  | 8.1E-06  | <b>2.0E-03</b> |
|  | 1.7E-07  | 8.0E-06  | <b>3.9E-02</b> |
|  | 2.4E-06  | 8.1E-06  | <b>1.0E-04</b> |
|  | 4.7E-07  | 5.2E-06  | <b>1.5E-02</b> |

|    |          |         |                  |
|----|----------|---------|------------------|
| 1  |          |         |                  |
| 2  | 2.8E-06  | 8.5E-06 | <b>&lt;.0001</b> |
| 3  | -4.4E-07 | 4.9E-06 | 1.2E-01          |
| 4  |          |         |                  |
| 5  |          |         |                  |
| 6  |          |         |                  |
| 7  |          |         |                  |
| 8  |          |         |                  |
| 9  |          |         |                  |
| 10 |          |         |                  |
| 11 |          |         |                  |
| 12 |          |         |                  |
| 13 |          |         |                  |
| 14 |          |         |                  |
| 15 |          |         |                  |
| 16 |          |         |                  |
| 17 |          |         |                  |
| 18 |          |         |                  |
| 19 |          |         |                  |
| 20 |          |         |                  |
| 21 |          |         |                  |
| 22 |          |         |                  |
| 23 |          |         |                  |
| 24 |          |         |                  |
| 25 |          |         |                  |
| 26 |          |         |                  |
| 27 |          |         |                  |
| 28 |          |         |                  |
| 29 |          |         |                  |
| 30 |          |         |                  |
| 31 |          |         |                  |
| 32 |          |         |                  |
| 33 |          |         |                  |
| 34 |          |         |                  |
| 35 |          |         |                  |
| 36 |          |         |                  |
| 37 |          |         |                  |
| 38 |          |         |                  |
| 39 |          |         |                  |
| 40 |          |         |                  |
| 41 |          |         |                  |
| 42 |          |         |                  |
| 43 |          |         |                  |
| 44 |          |         |                  |
| 45 |          |         |                  |
| 46 |          |         |                  |
| 47 |          |         |                  |
| 48 |          |         |                  |
| 49 |          |         |                  |
| 50 |          |         |                  |
| 51 |          |         |                  |
| 52 |          |         |                  |
| 53 |          |         |                  |
| 54 |          |         |                  |
| 55 |          |         |                  |
| 56 |          |         |                  |
| 57 |          |         |                  |
| 58 |          |         |                  |
| 59 |          |         |                  |
| 60 |          |         |                  |

For peer review only

## Subanalysis: chronic oral GC vs. chronic inhalation GC vs. controls

**ANOVA of imaging parameters**

|                                     | F value | P value | P_FDR          |
|-------------------------------------|---------|---------|----------------|
| <b>Volumetric measures</b>          |         |         |                |
| <b>Global volumes</b>               |         |         |                |
| Total brain volume                  | 17.0    | 4.1E-08 | <b>1.5E-06</b> |
| Grey matter volume                  | 12.2    | 5.0E-06 | <b>9.1E-05</b> |
| White matter volume                 | 10.8    | 2.0E-05 | <b>1.8E-04</b> |
| Peripheral cortex                   | 8.5     | 2.1E-04 | <b>9.4E-04</b> |
| CSF volume                          | 3.0     | 5.2E-02 | <b>7.4E-02</b> |
| <b>Subcortical volumes</b>          |         |         |                |
| Accumbens                           | 0.4     | 7.0E-01 | 7.1E-01        |
| Amygdala                            | 5.8     | 2.9E-03 | <b>8.2E-03</b> |
| Caudate                             | 7.2     | 7.6E-04 | <b>2.9E-03</b> |
| Hippocampus                         | 4.9     | 7.8E-03 | <b>1.7E-02</b> |
| Pallidum                            | 7.1     | 7.9E-04 | <b>2.9E-03</b> |
| Putamen                             | 5.0     | 6.9E-03 | <b>1.6E-02</b> |
| Thalamus                            | 6.7     | 1.3E-03 | <b>4.1E-03</b> |
| <b>Regional grey matter volumes</b> |         |         |                |
| Amygdala                            | 10.1    | 4.2E-05 | <b>3.0E-04</b> |
| Caudate                             | 1.5     | 2.2E-01 | 2.4E-01        |
| Cerebellum                          | 4.1     | 1.6E-02 | <b>2.9E-02</b> |
| Cingulate gyrus, anterior           | 0.2     | 8.3E-01 | 8.3E-01        |
| Cingulate gyrus, posterior          | 4.2     | 1.6E-02 | <b>2.9E-02</b> |
| Cuneal cortex                       | 2.9     | 5.4E-02 | 7.4E-02        |
| Hippocampus                         | 9.1     | 1.1E-04 | <b>6.6E-04</b> |
| Insular cortex                      | 3.0     | 4.7E-02 | 7.1E-02        |
| Medial frontal gyrus                | 1.6     | 2.1E-01 | 2.4E-01        |
| Precuneal cortex                    | 8.6     | 1.8E-04 | <b>9.1E-04</b> |
| <b>DTI measures</b>                 |         |         |                |
| <b>Fractional anisotropy</b>        |         |         |                |
| Global                              | 5.4     | 4.4E-03 | <b>1.1E-02</b> |
| Body of corpus callosum             | 2.8     | 5.8E-02 | 7.8E-02        |
| Genu of corpus callosum             | 5.8     | 3.2E-03 | <b>8.2E-03</b> |
| Splenium of corpus callosum         | 2.7     | 6.5E-02 | 8.3E-02        |
| Cingulum cingulate                  | 2.3     | 1.0E-01 | 1.3E-01        |
| Cingulum hippocampus                | 3.7     | 2.4E-02 | <b>3.9E-02</b> |
| Uncinate                            | 1.3     | 2.7E-01 | 2.9E-01        |
| <b>Mean diffusivity</b>             |         |         |                |
| Global                              | 4.7     | 9.5E-03 | <b>1.9E-02</b> |
| Body of corpus callosum             | 3.3     | 3.6E-02 | 5.7E-02        |
| Genu of corpus callosum             | 6.3     | 1.8E-03 | <b>5.3E-03</b> |
| Splenium of corpus callosum         | 3.9     | 2.0E-02 | <b>3.5E-02</b> |
| Cingulum cingulate                  | 0.5     | 6.3E-01 | 6.7E-01        |

|    |                      |      |         |                |
|----|----------------------|------|---------|----------------|
| 1  |                      |      |         |                |
| 2  | Cingulum hippocampus | 11.6 | 9.0E-06 | <b>1.1E-04</b> |
| 3  | Uncinate             | 2.0  | 1.3E-01 | 1.6E-01        |
| 4  |                      |      |         |                |
| 5  |                      |      |         |                |
| 6  |                      |      |         |                |
| 7  |                      |      |         |                |
| 8  |                      |      |         |                |
| 9  |                      |      |         |                |
| 10 |                      |      |         |                |
| 11 |                      |      |         |                |
| 12 |                      |      |         |                |
| 13 |                      |      |         |                |
| 14 |                      |      |         |                |
| 15 |                      |      |         |                |
| 16 |                      |      |         |                |
| 17 |                      |      |         |                |
| 18 |                      |      |         |                |
| 19 |                      |      |         |                |
| 20 |                      |      |         |                |
| 21 |                      |      |         |                |
| 22 |                      |      |         |                |
| 23 |                      |      |         |                |
| 24 |                      |      |         |                |
| 25 |                      |      |         |                |
| 26 |                      |      |         |                |
| 27 |                      |      |         |                |
| 28 |                      |      |         |                |
| 29 |                      |      |         |                |
| 30 |                      |      |         |                |
| 31 |                      |      |         |                |
| 32 |                      |      |         |                |
| 33 |                      |      |         |                |
| 34 |                      |      |         |                |
| 35 |                      |      |         |                |
| 36 |                      |      |         |                |
| 37 |                      |      |         |                |
| 38 |                      |      |         |                |
| 39 |                      |      |         |                |
| 40 |                      |      |         |                |
| 41 |                      |      |         |                |
| 42 |                      |      |         |                |
| 43 |                      |      |         |                |
| 44 |                      |      |         |                |
| 45 |                      |      |         |                |
| 46 |                      |      |         |                |
| 47 |                      |      |         |                |
| 48 |                      |      |         |                |
| 49 |                      |      |         |                |
| 50 |                      |      |         |                |
| 51 |                      |      |         |                |
| 52 |                      |      |         |                |
| 53 |                      |      |         |                |
| 54 |                      |      |         |                |
| 55 |                      |      |         |                |
| 56 |                      |      |         |                |
| 57 |                      |      |         |                |
| 58 |                      |      |         |                |
| 59 |                      |      |         |                |
| 60 |                      |      |         |                |

For peer review only

**Post-hoc Dunnett's test****Oral GC vs. controls****Inhalation GC**

|  | Estimate | Lower CI | Upper CI | P value       | Estimate |
|--|----------|----------|----------|---------------|----------|
|  | -2535    | -18869   | 13798    | 0.90          | 3553     |
|  | -1552    | -10808   | 7703     | 0.89          | 1636     |
|  | -984     | -11702   | 9735     | 0.96          | 1917     |
|  | -2152    | -10481   | 6177     | 0.78          | 940      |
|  | -2408    | -7198    | 2381     | 0.43          | 154      |
|  | -9.9     | -42      | 22.1     | 0.49          | -1.8     |
|  | 52.1     | -19.3    | 123.5    | 0.19          | -20.6    |
|  | 112.7    | -12.9    | 238.2    | 0.09          | -5.0     |
|  | 59.2     | -79.1    | 197.5    | 0.54          | -38.4    |
|  | 4.01     | -68.2    | 76.2     | 0.98          | -23.0    |
|  | -65.4    | -222.8   | 92.0     | 0.55          | -26.1    |
|  | 61.9     | -120.7   | 244.5    | 0.66          | -11.6    |
|  | 4.8      | -60.8    | 70.3     | 0.97          | -15.1    |
|  | 79.6     | -147.1   | 306.0    | 0.65          | 57.1     |
|  | 25.7     | -76.5    | 127.9    | 0.79          | 4.4      |
|  | 36.0     | -158.8   | 230.7    | 0.87          | 25.5     |
|  | 63.5     | -52.4    | 179.5    | 0.37          | -24.3    |
|  | -110.3   | -280.0   | 59.3     | 0.26          | 34.4     |
|  | 170.0    | -201.0   | 541.2    | 0.49          | -59.9    |
|  | -0.0066  | -0.013   | -3.2E-04 | <b>0.038</b>  | -0.0025  |
|  | -0.0066  | -0.016   | 0.0032   | 0.24          | -0.0028  |
|  | -0.014   | -0.025   | -0.0031  | <b>0.0087</b> | -0.0020  |
|  | -0.0049  | -0.012   | 0.0028   | 0.27          | -0.0032  |
|  | 0.00033  | -0.010   | 0.0109   | 0.99          | -0.0034  |
|  | 0.0032   | -0.0078  | 0.014    | 0.73          | -0.0034  |
|  | 9.4E-06  | 8.7E-08  | 1.9E-05  | <b>0.048</b>  | 2.6E-06  |
|  | 1.1E-05  | -1.6E-06 | 2.3E-05  | 0.10          | 4.4E-06  |
|  | 2.0E-05  | 5.5E-06  | 3.5E-05  | <b>0.0043</b> | 2.8E-06  |
|  | 8.1E-06  | -2.4E-06 | 1.9E-05  | 0.16          | 5.2E-06  |
|  | 3.5E-06  | -5.3E-06 | 1.2E-05  | 0.58          | 2.0E-06  |

|    |         |          |         |      |         |
|----|---------|----------|---------|------|---------|
| 1  |         |          |         |      |         |
| 2  | 8.2E-06 | -2.4E-06 | 1.9E-05 | 0.16 | 6.3E-06 |
| 3  | 6.5E-06 | -3.4E-06 | 1.6E-05 | 0.25 | 2.0E-06 |
| 4  |         |          |         |      |         |
| 5  |         |          |         |      |         |
| 6  |         |          |         |      |         |
| 7  |         |          |         |      |         |
| 8  |         |          |         |      |         |
| 9  |         |          |         |      |         |
| 10 |         |          |         |      |         |
| 11 |         |          |         |      |         |
| 12 |         |          |         |      |         |
| 13 |         |          |         |      |         |
| 14 |         |          |         |      |         |
| 15 |         |          |         |      |         |
| 16 |         |          |         |      |         |
| 17 |         |          |         |      |         |
| 18 |         |          |         |      |         |
| 19 |         |          |         |      |         |
| 20 |         |          |         |      |         |
| 21 |         |          |         |      |         |
| 22 |         |          |         |      |         |
| 23 |         |          |         |      |         |
| 24 |         |          |         |      |         |
| 25 |         |          |         |      |         |
| 26 |         |          |         |      |         |
| 27 |         |          |         |      |         |
| 28 |         |          |         |      |         |
| 29 |         |          |         |      |         |
| 30 |         |          |         |      |         |
| 31 |         |          |         |      |         |
| 32 |         |          |         |      |         |
| 33 |         |          |         |      |         |
| 34 |         |          |         |      |         |
| 35 |         |          |         |      |         |
| 36 |         |          |         |      |         |
| 37 |         |          |         |      |         |
| 38 |         |          |         |      |         |
| 39 |         |          |         |      |         |
| 40 |         |          |         |      |         |
| 41 |         |          |         |      |         |
| 42 |         |          |         |      |         |
| 43 |         |          |         |      |         |
| 44 |         |          |         |      |         |
| 45 |         |          |         |      |         |
| 46 |         |          |         |      |         |
| 47 |         |          |         |      |         |
| 48 |         |          |         |      |         |
| 49 |         |          |         |      |         |
| 50 |         |          |         |      |         |
| 51 |         |          |         |      |         |
| 52 |         |          |         |      |         |
| 53 |         |          |         |      |         |
| 54 |         |          |         |      |         |
| 55 |         |          |         |      |         |
| 56 |         |          |         |      |         |
| 57 |         |          |         |      |         |
| 58 |         |          |         |      |         |
| 59 |         |          |         |      |         |
| 60 |         |          |         |      |         |

For peer review only

## : vs. controls

|  | Lower CI | Upper CI | P value       |
|--|----------|----------|---------------|
|  | -2340    | 9445     | 0.31          |
|  | -1703    | 4975     | 0.45          |
|  | -1950    | 5784     | 0.44          |
|  | -2065    | 3945     | 0.70          |
|  | -1573    | 1882     | 0.96          |
|  | -11.7    | 11.4     | 0.97          |
|  | -46.4    | 5.2      | 0.14          |
|  | -50.3    | 40.3     | 0.95          |
|  | -88.3    | 11.5     | 0.16          |
|  | -49.0    | 3.1      | 0.094         |
|  | -82.9    | 30.7     | 0.49          |
|  | -77.5    | 54.3     | 0.88          |
|  | -38.8    | 8.5      | 0.27          |
|  | -24.7    | 139.0    | 0.22          |
|  | -32.4    | 41.3     | 0.94          |
|  | -44.8    | 95.8     | 0.63          |
|  | -66.1    | 17.6     | 0.34          |
|  | -26.8    | 95.6     | 0.36          |
|  | -194.0   | 74.1     | 0.51          |
|  | -0.0048  | -2.3E-04 | <b>0.027</b>  |
|  | -0.0063  | 7.2E-04  | 0.14          |
|  | -0.0060  | 0.0020   | 0.44          |
|  | -0.0060  | -4.9E-04 | <b>0.017</b>  |
|  | -0.0072  | 4.5E-04  | 0.093         |
|  | -0.0074  | 6.4E-04  | 0.11          |
|  | -7.7E-07 | 6.0E-06  | 0.16          |
|  | 4.7E-08  | 8.8E-06  | <b>0.05</b>   |
|  | -2.5E-06 | 8.0E-06  | 0.40          |
|  | 1.4E-06  | 9.0E-06  | <b>0.0044</b> |
|  | -1.2E-06 | 5.2E-06  | 0.28          |



|    |          |         |                |
|----|----------|---------|----------------|
| 1  |          |         |                |
| 2  | 2.5E-06  | 1.0E-05 | <b>5.0E-04</b> |
| 3  | -1.6E-06 | 5.6E-06 | 0.36           |
| 4  |          |         |                |
| 5  |          |         |                |
| 6  |          |         |                |
| 7  |          |         |                |
| 8  |          |         |                |
| 9  |          |         |                |
| 10 |          |         |                |
| 11 |          |         |                |
| 12 |          |         |                |
| 13 |          |         |                |
| 14 |          |         |                |
| 15 |          |         |                |
| 16 |          |         |                |
| 17 |          |         |                |
| 18 |          |         |                |
| 19 |          |         |                |
| 20 |          |         |                |
| 21 |          |         |                |
| 22 |          |         |                |
| 23 |          |         |                |
| 24 |          |         |                |
| 25 |          |         |                |
| 26 |          |         |                |
| 27 |          |         |                |
| 28 |          |         |                |
| 29 |          |         |                |
| 30 |          |         |                |
| 31 |          |         |                |
| 32 |          |         |                |
| 33 |          |         |                |
| 34 |          |         |                |
| 35 |          |         |                |
| 36 |          |         |                |
| 37 |          |         |                |
| 38 |          |         |                |
| 39 |          |         |                |
| 40 |          |         |                |
| 41 |          |         |                |
| 42 |          |         |                |
| 43 |          |         |                |
| 44 |          |         |                |
| 45 |          |         |                |
| 46 |          |         |                |
| 47 |          |         |                |
| 48 |          |         |                |
| 49 |          |         |                |
| 50 |          |         |                |
| 51 |          |         |                |
| 52 |          |         |                |
| 53 |          |         |                |
| 54 |          |         |                |
| 55 |          |         |                |
| 56 |          |         |                |
| 57 |          |         |                |
| 58 |          |         |                |
| 59 |          |         |                |
| 60 |          |         |                |

For peer review only

## Primary comparison: oral GC vs. inhalation GC vs. controls

|                          | <u>ANOVA of cognitive parameters</u> |                |              | <u>Post-hoc Dun </u>  |
|--------------------------|--------------------------------------|----------------|--------------|-----------------------|
|                          | <b>F value</b>                       | <b>P value</b> | <b>P_FDR</b> | <u>Oral GC vs. co</u> |
|                          |                                      |                |              | <b>Estimate</b>       |
| Reaction time            | 1.0                                  | 0.37           | 0.41         |                       |
| Fluid intelligence score | 0.89                                 | 0.41           | 0.41         |                       |
| Digit span               | 1.4                                  | 0.25           | 0.38         |                       |
| Trail making A           | 5.6                                  | 0.0036         | 0.0073       | -0.11                 |
| Trail making B           | 6.1                                  | 0.0023         | 0.0068       | -0.12                 |
| Symbol substitution      | 10.3                                 | 3.5E-05        | 2.1E-04      | -0.17                 |

For peer review only

nett's testontrolsInhalation GC vs. controls

| Lower CI | Upper CI | P value      | Estimate | Lower CI | Upper CI |
|----------|----------|--------------|----------|----------|----------|
| -0.28    | 0.06     | 0.25         | -0.03    | -0.15    | 0.09     |
| -0.30    | 0.05     | 0.19         | -0.01    | -0.13    | 0.11     |
| -0.34    | -0.008   | <b>0.038</b> | -0.04    | -0.15    | 0.08     |

For peer review only

1  
2  
3  
4  
5  
6 **P value**  
7  
8  
9  
10  
11  
12 0.78  
13 0.98  
14 0.72  
15  
16  
17  
18  
19  
20  
21  
22  
23  
24  
25  
26  
27  
28  
29  
30  
31  
32  
33  
34  
35  
36  
37  
38  
39  
40  
41  
42  
43  
44  
45  
46  
47  
48  
49  
50  
51  
52  
53  
54  
55  
56  
57  
58  
59  
60

For peer review only

## Primary comparison: oral GC vs. inhalation GC vs. controls

|             | <u>Likelihood ratio test of emotional parameters</u> |                |              | <u>Post-hoc pair</u>  |
|-------------|------------------------------------------------------|----------------|--------------|-----------------------|
|             | <b>Chi squared statistic</b>                         | <b>P value</b> | <b>P_FDR</b> | <u>Oral GC vs. co</u> |
|             |                                                      |                |              | <b>OR</b>             |
| Depression  | 10.6                                                 | 0.0049         | 0.0049       | 1.76                  |
| Disinterest | 10.9                                                 | 0.0043         | 0.0049       | 1.84                  |
| Tenseness   | 13.4                                                 | 0.0012         | 0.0025       | 1.78                  |
| Tiredness   | 32.4                                                 | 9.2E-08        | 3.7E-07      | 1.90                  |

For the pairwise comparisons, P values in bold are statistically significant after Bonferroni correctio

**wise comparisons**

**controls**

**Inhalation GC vs. controls**

| 95% CI     | P value        | OR   | 95% CI     | P value        |
|------------|----------------|------|------------|----------------|
| 1.25; 2.43 | <b>0.00082</b> | 1.10 | 0.87; 1.38 | 0.43           |
| 1.29; 2.56 | <b>0.00051</b> | 1.06 | 0.82; 1.36 | 0.64           |
| 1.29; 2.41 | <b>0.00030</b> | 1.16 | 0.92; 1.43 | 0.19           |
| 1.45; 2.50 | <b>4.4E-06</b> | 1.35 | 1.14; 1.60 | <b>6.3E-04</b> |

Adjustment for family-wise error rate of two tests (P < 0.025)

For peer review only

## Subanalysis: chronic oral GC vs. chronic inhalation GC vs. controls

|                          | <u>ANOVA of cognitive parameters</u> |                |              | <u>Post-hoc Dunnett</u>                        |
|--------------------------|--------------------------------------|----------------|--------------|------------------------------------------------|
|                          | <u>F value</u>                       | <u>P value</u> | <u>P_FDR</u> | <u>Oral GC vs. controls</u><br><u>Estimate</u> |
| Reaction time            | 0.17                                 | 0.84           | 0.84         |                                                |
| Fluid intelligence score | 1.1                                  | 0.34           | 0.84         |                                                |
| Digit span               | 3.5                                  | 0.031          | 0.19         |                                                |
| Trail making A           | 0.41                                 | 0.66           | 0.84         | 0.12                                           |
| Trail making B           | 0.28                                 | 0.75           | 0.84         | -0.080                                         |
| Symbol substitution      | 0.35                                 | 0.70           | 0.84         | -0.078                                         |

For peer review only

1  
2  
3  
4  
5  
6  
7  
8  
9  
10  
11  
12  
13  
14  
15  
16  
17  
18  
19  
20  
21  
22  
23  
24  
25  
26  
27  
28  
29  
30  
31  
32  
33  
34  
35  
36  
37  
38  
39  
40  
41  
42  
43  
44  
45  
46  
47  
48  
49  
50  
51  
52  
53  
54  
55  
56  
57  
58  
59  
60

**nett's test**

**ontrols**

**Inhalation GC vs. controls**

| Lower CI | Upper CI | P value | Estimate | Lower CI | Upper CI |
|----------|----------|---------|----------|----------|----------|
|----------|----------|---------|----------|----------|----------|

|       |      |      |          |       |      |
|-------|------|------|----------|-------|------|
| -0.26 | 0.51 | 0.69 | -0.070   | -0.24 | 0.10 |
| -0.47 | 0.31 | 0.84 | -4.7E-04 | -0.17 | 0.17 |
| -0.45 | 0.30 | 0.84 | -0.049   | -0.21 | 0.11 |

For peer review only



1  
2  
3  
4  
5  
6  
7  
8  
9  
10  
11  
12  
13  
14  
15  
16  
17  
18  
19  
20  
21  
22  
23  
24  
25  
26  
27  
28  
29  
30  
31  
32  
33  
34  
35  
36  
37  
38  
39  
40  
41  
42  
43  
44  
45  
46  
47  
48  
49  
50  
51  
52  
53  
54  
55  
56  
57  
58  
59  
60

**P value**

0.55  
1.00  
0.71

For peer review only

## Subanalysis: chronic oral GC vs. chronic inhalation GC vs. controls

|             | <u>Likelihood ratio test of emotional parameters</u> |                |              | <u>Post-hoc pair</u>  |
|-------------|------------------------------------------------------|----------------|--------------|-----------------------|
|             | <u>Chi squared statistic</u>                         | <u>P value</u> | <u>P_FDR</u> | <u>Oral GC vs. co</u> |
|             |                                                      |                |              | <u>OR</u>             |
| Depression  | 1.1                                                  | 0.57           | 0.57         | 1.21                  |
| Disinterest | 2.2                                                  | 0.33           | 0.44         | 1.41                  |
| Tenseness   | 2.5                                                  | 0.28           | 0.44         | 1.84                  |
| Tiredness   | 4.4                                                  | 0.11           | 0.44         | 0.96                  |

For the pairwise comparisons, P values in bold are statistically significant after Bonferroni c

**wise comparisons****controls****Inhalation GC vs. controls**

| 95% CI     | P value | OR   | 95% CI     | P value        |
|------------|---------|------|------------|----------------|
| 0.45; 2.73 | 0.67    | 0.85 | 0.59; 1.18 | 0.34           |
| 0.53; 3.17 | 0.44    | 0.79 | 0.53; 1.13 | 0.21           |
| 0.84; 3.68 | 0.10    | 1.05 | 0.78; 1.40 | 0.73           |
| 0.49; 1.84 | 0.91    | 1.28 | 1.01; 1.61 | <b>3.7E-02</b> |

Correction for family-wise error rate of two tests ( $P < 0.025$ )

For peer review only

## Sensitivity analysis among participants without exclusion based on p

**ANOVA of imaging parameters**

|                                     | F value | P value | P_FDR          |
|-------------------------------------|---------|---------|----------------|
| <b>Volumetric measures</b>          |         |         |                |
| <b>Global volumes</b>               |         |         |                |
| Total brain volume                  | 17.7    | 2.2E-08 | <b>1.3E-07</b> |
| Grey matter volume                  | 22.3    | 2.0E-10 | <b>2.4E-09</b> |
| White matter volume                 | 5.5     | 4.1E-03 | <b>6.7E-03</b> |
| Peripheral cortex                   | 24.6    | 2.0E-11 | <b>4.4E-10</b> |
| CSF volume                          | 14.2    | 7.1E-07 | <b>2.3E-06</b> |
| <b>Subcortical volumes</b>          |         |         |                |
| Accumbens                           | 10.2    | 3.8E-05 | <b>1.0E-04</b> |
| Amygdala                            | 1.5     | 2.2E-01 | 2.4E-01        |
| Caudate                             | 4.5     | 1.1E-02 | <b>1.7E-02</b> |
| Hippocampus                         | 2.1     | 1.2E-01 | 1.5E-01        |
| Pallidum                            | 6.9     | 1.0E-03 | <b>1.9E-03</b> |
| Putamen                             | 9.8     | 5.6E-05 | <b>1.5E-04</b> |
| Thalamus                            | 9.3     | 9.4E-05 | <b>2.3E-04</b> |
| <b>Regional grey matter volumes</b> |         |         |                |
| Amygdala                            | 21.0    | 7.8E-10 | <b>7.0E-09</b> |
| Caudate                             | 12.3    | 4.7E-06 | <b>1.4E-05</b> |
| Cerebellum                          | 5.8     | 3.1E-03 | <b>5.2E-03</b> |
| Cingulate gyrus, anterior           | 1.6     | 2.0E-01 | 2.2E-01        |
| Cingulate gyrus, posterior          | 0.6     | 5.3E-01 | 5.5E-01        |
| Cuneal cortex                       | 1.5     | 2.2E-01 | 2.4E-01        |
| Hippocampus                         | 1.8     | 1.6E-01 | 1.9E-01        |
| Insular cortex                      | 8.7     | 1.7E-04 | <b>3.5E-04</b> |
| Medial frontal gyrus                | 0.6     | 5.7E-01 | 5.7E-01        |
| Precuneal cortex                    | 4.0     | 1.9E-02 | <b>2.7E-02</b> |
| <b>DTI measures</b>                 |         |         |                |
| <b>Fractional anisotropy</b>        |         |         |                |
| Global                              | 15.5    | 1.8E-07 | <b>9.4E-07</b> |
| Body of corpus callosum             | 8.9     | 1.4E-04 | <b>3.1E-04</b> |
| Genu of corpus callosum             | 15.2    | 2.5E-07 | <b>1.1E-06</b> |
| Splenium of corpus callosum         | 2.2     | 1.1E-01 | 1.3E-01        |
| Cingulum cingulate                  | 3.8     | 2.3E-02 | <b>3.1E-02</b> |
| Cingulum hippocampus                | 2.7     | 6.4E-02 | 8.6E-02        |
| Uncinate                            | 2.5     | 8.2E-02 | 1.1E-01        |
| <b>Mean diffusivity</b>             |         |         |                |
| Global                              | 24.5    | 2.4E-11 | <b>4.4E-10</b> |
| Body of corpus callosum             | 14.2    | 6.7E-07 | <b>2.3E-06</b> |
| Genu of corpus callosum             | 17.9    | 1.7E-08 | <b>1.2E-07</b> |
| Splenium of corpus callosum         | 6.7     | 1.2E-03 | <b>2.2E-03</b> |

|    |                      |      |         |                |
|----|----------------------|------|---------|----------------|
| 1  |                      |      |         |                |
| 2  | Cingulum cingulate   | 4.9  | 7.6E-03 | <b>1.2E-02</b> |
| 3  | Cingulum hippocampus | 14.5 | 4.9E-07 | <b>2.0E-06</b> |
| 4  | Uncinate             | 7.3  | 6.6E-04 | <b>1.3E-03</b> |
| 5  |                      |      |         |                |
| 6  |                      |      |         |                |
| 7  |                      |      |         |                |
| 8  |                      |      |         |                |
| 9  |                      |      |         |                |
| 10 |                      |      |         |                |
| 11 |                      |      |         |                |
| 12 |                      |      |         |                |
| 13 |                      |      |         |                |
| 14 |                      |      |         |                |
| 15 |                      |      |         |                |
| 16 |                      |      |         |                |
| 17 |                      |      |         |                |
| 18 |                      |      |         |                |
| 19 |                      |      |         |                |
| 20 |                      |      |         |                |
| 21 |                      |      |         |                |
| 22 |                      |      |         |                |
| 23 |                      |      |         |                |
| 24 |                      |      |         |                |
| 25 |                      |      |         |                |
| 26 |                      |      |         |                |
| 27 |                      |      |         |                |
| 28 |                      |      |         |                |
| 29 |                      |      |         |                |
| 30 |                      |      |         |                |
| 31 |                      |      |         |                |
| 32 |                      |      |         |                |
| 33 |                      |      |         |                |
| 34 |                      |      |         |                |
| 35 |                      |      |         |                |
| 36 |                      |      |         |                |
| 37 |                      |      |         |                |
| 38 |                      |      |         |                |
| 39 |                      |      |         |                |
| 40 |                      |      |         |                |
| 41 |                      |      |         |                |
| 42 |                      |      |         |                |
| 43 |                      |      |         |                |
| 44 |                      |      |         |                |
| 45 |                      |      |         |                |
| 46 |                      |      |         |                |
| 47 |                      |      |         |                |
| 48 |                      |      |         |                |
| 49 |                      |      |         |                |
| 50 |                      |      |         |                |
| 51 |                      |      |         |                |
| 52 |                      |      |         |                |
| 53 |                      |      |         |                |
| 54 |                      |      |         |                |
| 55 |                      |      |         |                |
| 56 |                      |      |         |                |
| 57 |                      |      |         |                |
| 58 |                      |      |         |                |
| 59 |                      |      |         |                |
| 60 |                      |      |         |                |

For peer review only

psychiatric, neurological or endocrine history (oral GC vs. inhalation GC vs. c

| <u>Post-hoc Dunnett's test</u> |          |          |                |  |                      |
|--------------------------------|----------|----------|----------------|--|----------------------|
| <u>Oral GC vs. controls</u>    |          |          |                |  | <u>Inhalation GC</u> |
| Estimate                       | Lower CI | Upper CI | P value        |  | Estimate             |
| -3460                          | -9320    | 2400     | 0.32           |  | 3535                 |
| -2224                          | -5577    | 1130     | 0.25           |  | 1454                 |
| -1237                          | -5078    | 2604     | 0.69           |  | 2080                 |
| -3318                          | -6330    | -307     | <b>0.028</b>   |  | 1172                 |
| 1220                           | -518     | 2958     | 0.12           |  | 223                  |
| -8.9                           | -20.4    | 2.7      | 0.16           |  | -3.7                 |
| 58.6                           | 13.8     | 103.5    | <b>0.0072</b>  |  | -5.9                 |
| 1.2                            | -24.5    | 27.0     | 0.99           |  | -16.2                |
| -33.8                          | -90.5    | 22.9     | 0.32           |  | -20.1                |
| -19.9                          | -86.2    | 46.5     | 0.72           |  | -10.7                |
| -6.7                           | -30.4    | 17.1     | 0.75           |  | -21.7                |
| 149.6                          | 66.9     | 232.4    | <b>0.00010</b> |  | 42.9                 |
| 17.8                           | -19.4    | 54.9     | 0.47           |  | -2.9                 |
| -42.1                          | -103.5   | 19.4     | 0.23           |  | 8.0                  |
| -9.7                           | -142.8   | 123.4    | 0.97           |  | -1.7                 |
| -0.0031                        | -0.0055  | -7.5E-04 | <b>0.0066</b>  |  | -0.0015              |
| -0.0039                        | -0.0076  | -0.0003  | <b>0.032</b>   |  | -0.0014              |
| -0.0056                        | -0.0097  | -0.0014  | <b>0.0055</b>  |  | -0.0013              |
| -0.0014                        | -0.0052  | 0.0025   | 0.64           |  | -0.0018              |
| 6.6E-06                        | 3.0E-06  | 1.0E-05  | <b>3.7E-05</b> |  | 1.9E-06              |
| 6.7E-06                        | 1.9E-06  | 1.1E-05  | <b>0.0034</b>  |  | 4.0E-06              |
| 8.0E-06                        | 2.5E-06  | 1.4E-05  | <b>0.0023</b>  |  | 3.3E-06              |
| 3.7E-06                        | -3.1E-07 | 7.6E-06  | 0.076          |  | 4.0E-06              |

|    |         |          |         |              |         |
|----|---------|----------|---------|--------------|---------|
| 1  |         |          |         |              |         |
| 2  | 2.5E-06 | -6.8E-07 | 5.7E-06 | 0.15         | 2.2E-06 |
| 3  | 2.6E-06 | -1.3E-06 | 6.6E-06 | 0.25         | 4.5E-06 |
| 4  | 4.0E-06 | 2.9E-07  | 7.7E-06 | <b>0.032</b> | 1.6E-06 |
| 5  |         |          |         |              |         |
| 6  |         |          |         |              |         |
| 7  |         |          |         |              |         |
| 8  |         |          |         |              |         |
| 9  |         |          |         |              |         |
| 10 |         |          |         |              |         |
| 11 |         |          |         |              |         |
| 12 |         |          |         |              |         |
| 13 |         |          |         |              |         |
| 14 |         |          |         |              |         |
| 15 |         |          |         |              |         |
| 16 |         |          |         |              |         |
| 17 |         |          |         |              |         |
| 18 |         |          |         |              |         |
| 19 |         |          |         |              |         |
| 20 |         |          |         |              |         |
| 21 |         |          |         |              |         |
| 22 |         |          |         |              |         |
| 23 |         |          |         |              |         |
| 24 |         |          |         |              |         |
| 25 |         |          |         |              |         |
| 26 |         |          |         |              |         |
| 27 |         |          |         |              |         |
| 28 |         |          |         |              |         |
| 29 |         |          |         |              |         |
| 30 |         |          |         |              |         |
| 31 |         |          |         |              |         |
| 32 |         |          |         |              |         |
| 33 |         |          |         |              |         |
| 34 |         |          |         |              |         |
| 35 |         |          |         |              |         |
| 36 |         |          |         |              |         |
| 37 |         |          |         |              |         |
| 38 |         |          |         |              |         |
| 39 |         |          |         |              |         |
| 40 |         |          |         |              |         |
| 41 |         |          |         |              |         |
| 42 |         |          |         |              |         |
| 43 |         |          |         |              |         |
| 44 |         |          |         |              |         |
| 45 |         |          |         |              |         |
| 46 |         |          |         |              |         |
| 47 |         |          |         |              |         |
| 48 |         |          |         |              |         |
| 49 |         |          |         |              |         |
| 50 |         |          |         |              |         |
| 51 |         |          |         |              |         |
| 52 |         |          |         |              |         |
| 53 |         |          |         |              |         |
| 54 |         |          |         |              |         |
| 55 |         |          |         |              |         |
| 56 |         |          |         |              |         |
| 57 |         |          |         |              |         |
| 58 |         |          |         |              |         |
| 59 |         |          |         |              |         |
| 60 |         |          |         |              |         |

For peer review only

controls)

**vs. controls**

|  | Lower CI | Upper CI | P value        |
|--|----------|----------|----------------|
|  | -121     | 7190     | 0.060          |
|  | -637     | 3546     | 0.22           |
|  | -316     | 4476     | 0.10           |
|  | -706     | 3051     | 0.29           |
|  | -861     | 1307     | 0.65           |
|  | -10.9    | 3.5      | 0.41           |
|  | -33.9    | 22.1     | 0.84           |
|  | -32.3    | -0.2     | <b>0.047</b>   |
|  | -55.5    | 15.3     | 0.35           |
|  | -52.1    | 30.7     | 0.78           |
|  | -36.5    | -6.8     | <b>0.0023</b>  |
|  | -8.7     | 94.5     | 0.12           |
|  | -26.1    | 20.3     | 0.93           |
|  | -30.3    | 46.3     | 0.84           |
|  | -84.7    | 81.3     | 1.00           |
|  | -0.0030  | -4.9E-05 | <b>0.041</b>   |
|  | -0.0036  | 8.9E-04  | 0.30           |
|  | -0.0039  | 0.0013   | 0.44           |
|  | -0.0042  | 5.9E-04  | 0.17           |
|  | -3.2E-07 | 4.1E-06  | 0.057          |
|  | 1.1E-06  | 7.0E-06  | <b>0.0048</b>  |
|  | -1.4E-07 | 6.7E-06  | 0.062          |
|  | 1.5E-06  | 6.4E-06  | <b>7.0E-04</b> |



|    |          |         |                |
|----|----------|---------|----------------|
| 1  |          |         |                |
| 2  | 2.2E-07  | 4.2E-06 | <b>0.026</b>   |
| 3  | 2.0E-06  | 7.0E-06 | <b>1.0E-04</b> |
| 4  | -7.5E-07 | 3.9E-06 | 0.23           |
| 5  |          |         |                |
| 6  |          |         |                |
| 7  |          |         |                |
| 8  |          |         |                |
| 9  |          |         |                |
| 10 |          |         |                |
| 11 |          |         |                |
| 12 |          |         |                |
| 13 |          |         |                |
| 14 |          |         |                |
| 15 |          |         |                |
| 16 |          |         |                |
| 17 |          |         |                |
| 18 |          |         |                |
| 19 |          |         |                |
| 20 |          |         |                |
| 21 |          |         |                |
| 22 |          |         |                |
| 23 |          |         |                |
| 24 |          |         |                |
| 25 |          |         |                |
| 26 |          |         |                |
| 27 |          |         |                |
| 28 |          |         |                |
| 29 |          |         |                |
| 30 |          |         |                |
| 31 |          |         |                |
| 32 |          |         |                |
| 33 |          |         |                |
| 34 |          |         |                |
| 35 |          |         |                |
| 36 |          |         |                |
| 37 |          |         |                |
| 38 |          |         |                |
| 39 |          |         |                |
| 40 |          |         |                |
| 41 |          |         |                |
| 42 |          |         |                |
| 43 |          |         |                |
| 44 |          |         |                |
| 45 |          |         |                |
| 46 |          |         |                |
| 47 |          |         |                |
| 48 |          |         |                |
| 49 |          |         |                |
| 50 |          |         |                |
| 51 |          |         |                |
| 52 |          |         |                |
| 53 |          |         |                |
| 54 |          |         |                |
| 55 |          |         |                |
| 56 |          |         |                |
| 57 |          |         |                |
| 58 |          |         |                |
| 59 |          |         |                |
| 60 |          |         |                |

For peer review only

## Sensitivity analysis among participants without exclusion based on psychia

|                          | <u>ANOVA</u>   |                |                | <u>Post-hoc Dunnett</u>    |
|--------------------------|----------------|----------------|----------------|----------------------------|
|                          |                |                |                | <u>Oral GC vs. control</u> |
|                          | <b>F value</b> | <b>P value</b> | <b>P_FDR</b>   | <b>Estimate</b>            |
| Reaction time            | 1.0            | 0.35           | 0.42           |                            |
| Fluid intelligence score | 1.9            | 0.15           | 0.23           |                            |
| Digit span               | 0.5            | 0.63           | 0.63           |                            |
| Trail making A           | 6.6            | 0.0014         | <b>0.0028</b>  | -0.11                      |
| Trail making B           | 6.7            | 0.0013         | <b>0.0028</b>  | -0.12                      |
| Symbol substitution      | 9.7            | 6.2E-05        | <b>0.00037</b> | -0.15                      |

For peer review only

atric, neurological or endocrine history (oral GC vs. inhalation GC vs. contro

nett's test

ontrols

Inhalation GC vs. controls

|  | Lower CI | Upper CI | P value      | Estimate | Lower CI | Upper CI |
|--|----------|----------|--------------|----------|----------|----------|
|  | -0.26    | 0.03     | 0.16         | 0.020    | -0.08    | 0.12     |
|  | -0.27    | 0.02     | 0.10         | -0.018   | -0.12    | 0.08     |
|  | -0.29    | -0.01    | <b>0.029</b> | -0.061   | -0.16    | 0.04     |

For peer review only

1  
2  
3  
4  
5  
6  
7  
8  
9  
10  
11  
12  
13  
14  
15  
16  
17  
18  
19  
20  
21  
22  
23  
24  
25  
26  
27  
28  
29  
30  
31  
32  
33  
34  
35  
36  
37  
38  
39  
40  
41  
42  
43  
44  
45  
46  
47  
48  
49  
50  
51  
52  
53  
54  
55  
56  
57  
58  
59  
60

ls)

**P value**

0.86

0.88

0.28

For peer review only

## Sensitivity analysis among participants without exclusion based on psych

|             | <u>Likelihood ratio test of emotional parameters</u> |                |              | <u>Post-hoc pair</u>  |
|-------------|------------------------------------------------------|----------------|--------------|-----------------------|
|             | <u>Chi squared statistic</u>                         | <u>P value</u> | <u>P_FDR</u> | <u>Oral GC vs. co</u> |
|             |                                                      |                |              | <u>OR</u>             |
| Depression  | 11.1                                                 | 0.0039         | 0.0039       | 1.44                  |
| Disinterest | 17.8                                                 | 0.00014        | 1.9E-04      | 1.73                  |
| Tenseness   | 24.0                                                 | 6.1E-06        | 1.2E-05      | 1.68                  |
| Tiredness   | 39.2                                                 | 3.1E-09        | 1.2E-08      | 1.79                  |

For the pairwise comparisons, P values in bold are statistically significant after Bonferroni cor

psychiatric, neurological or endocrine history (oral GC vs. inhalation GC vs. con

**wise comparisons**

| <b>controls</b> |                | <b>Inhalation GC vs. controls</b> |               |                |
|-----------------|----------------|-----------------------------------|---------------|----------------|
| <b>95% CI</b>   | <b>P value</b> | <b>OR</b>                         | <b>95% CI</b> | <b>P value</b> |
| 1.08; 1.89      | <b>0.010</b>   | 1.23                              | 1.03; 1.46    | <b>0.023</b>   |
| 1.31; 2.27      | <b>8.5E-05</b> | 1.21                              | 1.00; 1.45    | 0.041          |
| 1.29; 2.16      | <b>7.0E-05</b> | 1.31                              | 1.11; 1.54    | <b>0.0014</b>  |
| 1.42; 2.27      | <b>9.0E-07</b> | 1.33                              | 1.15; 1.53    | <b>0.00011</b> |

adjustment for family-wise error rate of two tests (P < 0.025)

For peer review only

1  
2  
3  
4  
5  
6  
7  
8  
9  
10  
11  
12  
13  
14  
15  
16  
17  
18  
19  
20  
21  
22  
23  
24  
25  
26  
27  
28  
29  
30  
31  
32  
33  
34  
35  
36  
37  
38  
39  
40  
41  
42  
43  
44  
45  
46  
47  
48  
49  
50  
51  
52  
53  
54  
55  
56  
57  
58  
59  
60

trols)

For peer review only

## Oral GC users (n = 222)

|                                     | Number of outliers | %   |
|-------------------------------------|--------------------|-----|
| <b>Volumetric measures</b>          |                    |     |
| <b>Global volumes</b>               |                    |     |
| Total brain volume                  | 2                  | 0.9 |
| Grey matter volume                  | 6                  | 2.7 |
| White matter volume                 | 2                  | 0.9 |
| Peripheral cortex                   | 6                  | 2.7 |
| CSF volume                          | 9                  | 4.1 |
| <b>Subcortical volumes</b>          |                    |     |
| Accumbens                           | 2                  | 0.9 |
| Amygdala                            | 3                  | 1.4 |
| Caudate                             | 5                  | 2.3 |
| Hippocampus                         | 3                  | 1.4 |
| Pallidum                            | 2                  | 0.9 |
| Putamen                             | 7                  | 3.2 |
| Thalamus                            | 4                  | 1.8 |
| <b>Regional grey matter volumes</b> |                    |     |
| Amygdala                            | 5                  | 2.3 |
| Caudate                             | 18                 | 8.1 |
| Cerebellum                          | 11                 | 5.0 |
| Cingulate gyrus, anterior           | 7                  | 3.2 |
| Cingulate gyrus, posterior          | 5                  | 2.3 |
| Cuneal cortex                       | 3                  | 1.4 |
| Hippocampus                         | 4                  | 1.8 |
| Insular cortex                      | 6                  | 2.7 |
| Medial frontal gyrus                | 3                  | 1.4 |
| Precuneal cortex                    | 7                  | 3.2 |
| <b>DTI measures</b>                 |                    |     |
| <b>Fractional anisotropy</b>        |                    |     |
| Global                              | 2                  | 0.9 |
| Body of corpus callosum             | 4                  | 1.8 |
| Genu of corpus callosum             | 10                 | 4.5 |
| Splenium of corpus callosum         | 4                  | 1.8 |
| Cingulum cingulate                  | 4                  | 1.8 |
| Cingulum hippocampus                | 3                  | 1.4 |
| Uncinate                            | 1                  | 0.5 |
| <b>Mean diffusivity</b>             |                    |     |
| Global                              | 7                  | 3.2 |
| Body of corpus callosum             | 3                  | 1.4 |
| Genu of corpus callosum             | 4                  | 1.8 |
| Splenium of corpus callosum         | 5                  | 2.3 |
| Cingulum cingulate                  | 6                  | 2.7 |



1  
2  
3  
4  
5  
6  
7  
8  
9  
10  
11  
12  
13  
14  
15  
16  
17  
18  
19  
20  
21  
22  
23  
24  
25  
26  
27  
28  
29  
30  
31  
32  
33  
34  
35  
36  
37  
38  
39  
40  
41  
42  
43  
44  
45  
46  
47  
48  
49  
50  
51  
52  
53  
54  
55  
56  
57  
58  
59  
60

Cingulum hippocampus  
Uncinate

4  
4

1.8  
1.8

For peer review only

| <b>Inhalation GC users (n = 557)</b> |          | <b>Controls (n = 24106)</b> |          |
|--------------------------------------|----------|-----------------------------|----------|
| <b>Number of outliers</b>            | <b>%</b> | <b>Number of outliers</b>   | <b>%</b> |
| 1                                    | 0.2      | 134                         | 0.6      |
| 1                                    | 0.2      | 153                         | 0.6      |
| 3                                    | 0.5      | 130                         | 0.5      |
| 1                                    | 0.2      | 159                         | 0.7      |
| 22                                   | 3.9      | 859                         | 3.6      |
| 7                                    | 1.3      | 195                         | 0.8      |
| 6                                    | 1.1      | 217                         | 0.9      |
| 2                                    | 0.4      | 269                         | 1.1      |
| 11                                   | 2.0      | 399                         | 1.7      |
| 4                                    | 0.7      | 490                         | 2.0      |
| 1                                    | 0.2      | 237                         | 1.0      |
| 6                                    | 1.1      | 225                         | 0.9      |
| 7                                    | 1.3      | 281                         | 1.2      |
| 27                                   | 4.8      | 1138                        | 4.7      |
| 6                                    | 1.1      | 316                         | 1.3      |
| 21                                   | 3.8      | 758                         | 3.1      |
| 11                                   | 2.0      | 359                         | 1.5      |
| 2                                    | 0.4      | 304                         | 1.3      |
| 7                                    | 1.3      | 248                         | 1.0      |
| 2                                    | 0.4      | 239                         | 1.0      |
| 4                                    | 0.7      | 229                         | 0.9      |
| 2                                    | 0.4      | 216                         | 0.9      |
| 12                                   | 2.2      | 388                         | 1.6      |
| 13                                   | 2.3      | 456                         | 1.9      |
| 12                                   | 2.2      | 520                         | 2.2      |
| 20                                   | 3.6      | 331                         | 1.4      |
| 4                                    | 0.7      | 215                         | 0.9      |
| 4                                    | 0.7      | 277                         | 1.1      |
| 6                                    | 1.1      | 221                         | 0.9      |
| 11                                   | 2.0      | 613                         | 2.5      |
| 15                                   | 2.7      | 468                         | 1.9      |
| 11                                   | 2.0      | 535                         | 2.2      |
| 12                                   | 2.2      | 543                         | 2.3      |
| 10                                   | 1.8      | 447                         | 1.9      |

|    |    |     |     |     |
|----|----|-----|-----|-----|
| 1  |    |     |     |     |
| 2  | 16 | 2.9 | 343 | 1.4 |
| 3  | 6  | 1.1 | 322 | 1.3 |
| 4  |    |     |     |     |
| 5  |    |     |     |     |
| 6  |    |     |     |     |
| 7  |    |     |     |     |
| 8  |    |     |     |     |
| 9  |    |     |     |     |
| 10 |    |     |     |     |
| 11 |    |     |     |     |
| 12 |    |     |     |     |
| 13 |    |     |     |     |
| 14 |    |     |     |     |
| 15 |    |     |     |     |
| 16 |    |     |     |     |
| 17 |    |     |     |     |
| 18 |    |     |     |     |
| 19 |    |     |     |     |
| 20 |    |     |     |     |
| 21 |    |     |     |     |
| 22 |    |     |     |     |
| 23 |    |     |     |     |
| 24 |    |     |     |     |
| 25 |    |     |     |     |
| 26 |    |     |     |     |
| 27 |    |     |     |     |
| 28 |    |     |     |     |
| 29 |    |     |     |     |
| 30 |    |     |     |     |
| 31 |    |     |     |     |
| 32 |    |     |     |     |
| 33 |    |     |     |     |
| 34 |    |     |     |     |
| 35 |    |     |     |     |
| 36 |    |     |     |     |
| 37 |    |     |     |     |
| 38 |    |     |     |     |
| 39 |    |     |     |     |
| 40 |    |     |     |     |
| 41 |    |     |     |     |
| 42 |    |     |     |     |
| 43 |    |     |     |     |
| 44 |    |     |     |     |
| 45 |    |     |     |     |
| 46 |    |     |     |     |
| 47 |    |     |     |     |
| 48 |    |     |     |     |
| 49 |    |     |     |     |
| 50 |    |     |     |     |
| 51 |    |     |     |     |
| 52 |    |     |     |     |
| 53 |    |     |     |     |
| 54 |    |     |     |     |
| 55 |    |     |     |     |
| 56 |    |     |     |     |
| 57 |    |     |     |     |
| 58 |    |     |     |     |
| 59 |    |     |     |     |
| 60 |    |     |     |     |

For peer review only

## Sensitivity analysis after exclusion of outlier values

**ANOVA of imaging parameters**

|                                            | <b>F value</b> | <b>P value</b> | <b>P_FDR</b>   |
|--------------------------------------------|----------------|----------------|----------------|
| <b>Volumetric measures</b>                 |                |                |                |
| <b><i>Global volumes</i></b>               |                |                |                |
| Total brain volume                         | 16.0           | 1.1E-07        | <b>4.6E-07</b> |
| Grey matter volume                         | 28.8           | 3.4E-13        | <b>6.1E-12</b> |
| White matter volume                        | 5.4            | 4.6E-03        | <b>7.1E-03</b> |
| Peripheral cortex                          | 27.0           | 2.0E-12        | <b>1.8E-11</b> |
| CSF volume                                 | 16.8           | 5.0E-08        | <b>2.3E-07</b> |
| <b><i>Subcortical volumes</i></b>          |                |                |                |
| Accumbens                                  | 13.0           | 2.3E-06        | <b>5.8E-06</b> |
| Amygdala                                   | 2.7            | 6.9E-02        | 7.7E-02        |
| Caudate                                    | 4.7            | 8.8E-03        | <b>1.1E-02</b> |
| Hippocampus                                | 5.4            | 4.7E-03        | <b>7.1E-03</b> |
| Pallidum                                   | 4.9            | 7.4E-03        | <b>9.8E-03</b> |
| Putamen                                    | 13.7           | 1.1E-06        | <b>3.4E-06</b> |
| Thalamus                                   | 10.0           | 4.6E-05        | <b>8.7E-05</b> |
| <b><i>Regional grey matter volumes</i></b> |                |                |                |
| Amygdala                                   | 28.3           | 5.1E-13        | <b>6.1E-12</b> |
| Caudate                                    | 12.6           | 3.5E-06        | <b>8.4E-06</b> |
| Cerebellum                                 | 10.3           | 3.3E-05        | <b>6.6E-05</b> |
| Cingulate gyrus, anterior                  | 3.9            | 2.1E-02        | <b>2.6E-02</b> |
| Cingulate gyrus, posterior                 | 2.3            | 1.0E-01        | 1.1E-01        |
| Cuneal cortex                              | 1.5            | 2.2E-01        | 2.2E-01        |
| Hippocampus                                | 3.3            | 3.9E-02        | <b>4.6E-02</b> |
| Insular cortex                             | 13.1           | 2.0E-06        | <b>5.5E-06</b> |
| Medial frontal gyrus                       | 0.4            | 6.8E-01        | 6.8E-01        |
| Precuneal cortex                           | 5.2            | 5.4E-03        | <b>7.5E-03</b> |
| <b>DTI measures</b>                        |                |                |                |
| <b><i>Fractional anisotropy</i></b>        |                |                |                |
| Global                                     | 22.7           | 1.4E-10        | <b>1.0E-09</b> |
| Body of corpus callosum                    | 11.4           | 1.1E-05        | <b>2.5E-05</b> |
| Genu of corpus callosum                    | 15.3           | 2.3E-07        | <b>8.4E-07</b> |
| Splenium of corpus callosum                | 2.7            | 6.4E-02        | 7.5E-02        |
| Cingulum cingulate                         | 6.5            | 1.5E-03        | <b>2.5E-03</b> |
| Cingulum hippocampus                       | 7.5            | 5.7E-04        | <b>9.7E-04</b> |
| Uncinate                                   | 2.6            | 7.6E-02        | 8.3E-02        |
| <b><i>Mean diffusivity</i></b>             |                |                |                |
| Global                                     | 29.1           | 2.4E-13        | <b>6.1E-12</b> |
| Body of corpus callosum                    | 17.1           | 3.6E-08        | <b>1.9E-07</b> |
| Genu of corpus callosum                    | 21.6           | 4.3E-10        | <b>2.6E-09</b> |
| Splenium of corpus callosum                | 9.9            | 5.2E-05        | <b>9.4E-05</b> |

1  
2  
3  
4  
5  
6  
7  
8  
9  
10  
11  
12  
13  
14  
15  
16  
17  
18  
19  
20  
21  
22  
23  
24  
25  
26  
27  
28  
29  
30  
31  
32  
33  
34  
35  
36  
37  
38  
39  
40  
41  
42  
43  
44  
45  
46  
47  
48  
49  
50  
51  
52  
53  
54  
55  
56  
57  
58  
59  
60

|                      |      |         |                |
|----------------------|------|---------|----------------|
| Cingulum cingulate   | 5.3  | 5.2E-03 | <b>7.5E-03</b> |
| Cingulum hippocampus | 13.7 | 1.1E-06 | <b>3.4E-06</b> |
| Uncinate             | 11.3 | 1.2E-05 | <b>2.5E-05</b> |

P values in blue were not significant ( $P < 0.05$ ) in the original analysis, but are in this analysis

For peer review only

**Post-hoc Dunnett's test****Oral GC vs. controls****Inhalation GC**

|  | <b>Estimate</b> | <b>Lower CI</b> | <b>Upper CI</b> | <b>P value</b>   | <b>Estimate</b> |
|--|-----------------|-----------------|-----------------|------------------|-----------------|
|  | -3991           | -10852          | 2869            | 0.33             | 3756            |
|  | -3143           | -7081           | 794             | 0.14             | 1120            |
|  | -1861           | -6349           | 2626            | 0.55             | 2374            |
|  | -4412           | -7948           | -876            | <b>0.011</b>     | 1148            |
|  | 1437            | -210            | 3084            | 0.10             | -449            |
|  | -15.6           | -28.8           | -2.3            | <b>0.018</b>     | -4.6            |
|  | 69.4            | 18.4            | 120.3           | <b>0.0049</b>    | 4.5             |
|  | -17.1           | -71.2           | 37.0            | 0.70             | -17             |
|  | 5.7             | -20.5           | 31.8            | 0.83             | -9.8            |
|  | -63             | -127.1          | 1.0             | 0.055            | -19.9           |
|  | -25.6           | -98.2           | 46.9            | 0.64             | -0.6            |
|  | -17.2           | -43.8           | 9.4             | 0.26             | -22.6           |
|  | 138.1           | 67.7            | 208.6           | <b>&lt;.0001</b> | 15.1            |
|  | -1.1            | -42.8           | 40.6            | 1.00             | -6.6            |
|  | 110.5           | -7.8            | 229.0           | 0.071            | 27.1            |
|  | 24.3            | -22.4           | 70.9            | 0.41             | 2.4             |
|  | -74.8           | -143.2          | -6.4            | <b>0.029</b>     | 8.7             |
|  | -60.1           | -213.6          | 93.3            | 0.59             | 0.014           |
|  | -0.0043         | -0.0067         | -0.0018         | <b>2.0E-04</b>   | -0.0019         |
|  | -0.0048         | -0.0086         | -0.0010         | <b>0.0097</b>    | -0.0021         |
|  | -0.0059         | -0.010          | -0.0016         | <b>0.0048</b>    | -0.0017         |
|  | -0.0022         | -0.0065         | 0.0021          | 0.42             | -0.0026         |
|  | -1.2E-04        | -0.0046         | 0.0044          | 1.00             | -0.0036         |
|  | 7.1E-06         | 3.7E-06         | 1.1E-05         | <b>&lt;.0001</b> | 2.5E-06         |
|  | 7.5E-06         | 2.8E-06         | 1.2E-05         | <b>7.0E-04</b>   | 3.7E-06         |
|  | 9.5E-06         | 3.9E-06         | 1.5E-05         | <b>3.0E-04</b>   | 3.6E-06         |
|  | 4.6E-06         | 7.3E-07         | 8.4E-06         | <b>0.016</b>     | 4.2E-06         |

|   |         |          |         |               |         |
|---|---------|----------|---------|---------------|---------|
| 1 |         |          |         |               |         |
| 2 | 2.6E-06 | -9.4E-07 | 6.1E-06 | 0.19          | 2.6E-06 |
| 3 | 4.4E-06 | 2.5E-07  | 8.6E-06 | <b>0.035</b>  | 4.3E-06 |
| 4 | 5.8E-06 | 1.9E-06  | 9.7E-06 | <b>0.0018</b> | 2.4E-06 |
| 5 |         |          |         |               |         |
| 6 |         |          |         |               |         |

7 after exclusion of outliers.

8  
9  
10  
11  
12  
13  
14  
15  
16  
17  
18  
19  
20  
21  
22  
23  
24  
25  
26  
27  
28  
29  
30  
31  
32  
33  
34  
35  
36  
37  
38  
39  
40  
41  
42  
43  
44  
45  
46  
47  
48  
49  
50  
51  
52  
53  
54  
55  
56  
57  
58  
59  
60

For peer review only

## : vs. controls

|  | Lower CI | Upper CI | P value        |
|--|----------|----------|----------------|
|  | -565     | 8076     | 0.10           |
|  | -1337    | 3576     | 0.50           |
|  | -454     | 5203     | 0.11           |
|  | -1058    | 3355     | 0.41           |
|  | -1492    | 594      | 0.53           |
|  | -13.0    | 3.7      | 0.37           |
|  | -27.4    | 36.3     | 0.92           |
|  | -51.3    | 17.3     | 0.44           |
|  | -26.3    | 6.7      | 0.32           |
|  | -59.7    | 20.0     | 0.44           |
|  | -46.2    | 45.1     | 1.00           |
|  | -39.3    | -5.9     | <b>0.01</b>    |
|  | -28.8    | 59.1     | 0.66           |
|  | -32.5    | 19.3     | 0.78           |
|  | -47.9    | 102.0    | 0.63           |
|  | -27.0    | 31.8     | 0.97           |
|  | -34.1    | 51.4     | 0.85           |
|  | -95.6    | 95.6     | 1.00           |
|  | -0.0035  | -3.4E-04 | <b>0.013</b>   |
|  | -0.0045  | 3.4E-04  | 0.11           |
|  | -0.0044  | 0.0010   | 0.28           |
|  | -0.0053  | 9.7E-05  | 0.061          |
|  | -0.0064  | -7.5E-04 | <b>0.010</b>   |
|  | 3.1E-07  | 4.7E-06  | <b>0.022</b>   |
|  | 6.9E-07  | 6.6E-06  | <b>0.012</b>   |
|  | 2.9E-08  | 7.1E-06  | <b>0.048</b>   |
|  | 1.8E-06  | 6.7E-06  | <b>2.0E-04</b> |



|    |          |         |                |
|----|----------|---------|----------------|
| 1  |          |         |                |
| 2  | 3.6E-07  | 4.8E-06 | <b>0.019</b>   |
| 3  | 1.6E-06  | 6.9E-06 | <b>6.0E-04</b> |
| 4  | -8.8E-08 | 4.8E-06 | 0.061          |
| 5  |          |         |                |
| 6  |          |         |                |
| 7  |          |         |                |
| 8  |          |         |                |
| 9  |          |         |                |
| 10 |          |         |                |
| 11 |          |         |                |
| 12 |          |         |                |
| 13 |          |         |                |
| 14 |          |         |                |
| 15 |          |         |                |
| 16 |          |         |                |
| 17 |          |         |                |
| 18 |          |         |                |
| 19 |          |         |                |
| 20 |          |         |                |
| 21 |          |         |                |
| 22 |          |         |                |
| 23 |          |         |                |
| 24 |          |         |                |
| 25 |          |         |                |
| 26 |          |         |                |
| 27 |          |         |                |
| 28 |          |         |                |
| 29 |          |         |                |
| 30 |          |         |                |
| 31 |          |         |                |
| 32 |          |         |                |
| 33 |          |         |                |
| 34 |          |         |                |
| 35 |          |         |                |
| 36 |          |         |                |
| 37 |          |         |                |
| 38 |          |         |                |
| 39 |          |         |                |
| 40 |          |         |                |
| 41 |          |         |                |
| 42 |          |         |                |
| 43 |          |         |                |
| 44 |          |         |                |
| 45 |          |         |                |
| 46 |          |         |                |
| 47 |          |         |                |
| 48 |          |         |                |
| 49 |          |         |                |
| 50 |          |         |                |
| 51 |          |         |                |
| 52 |          |         |                |
| 53 |          |         |                |
| 54 |          |         |                |
| 55 |          |         |                |
| 56 |          |         |                |
| 57 |          |         |                |
| 58 |          |         |                |
| 59 |          |         |                |
| 60 |          |         |                |

For peer review only

|                          | Oral GC users (n = 222) |     | Inhalation GC users (n = 557) |  |
|--------------------------|-------------------------|-----|-------------------------------|--|
|                          | Number of outliers      | %   | Number of outliers            |  |
| Reaction time*           | 4                       | 1.8 | 11                            |  |
| Fluid intelligence score | 2                       | 0.9 | 1                             |  |
| Digit span               | 1                       | 0.5 | 24                            |  |
| Trail making A*          | 6                       | 2.7 | 10                            |  |
| Trail making B*          | 2                       | 0.9 | 2                             |  |
| Symbol substitution      | 5                       | 2.3 | 3                             |  |

\* Reaction time, trail making A, and trail making B were log transformed for normalization.

For peer review only

1  
2  
3  
4  
5  
6  
7  
8  
9  
10  
11  
12  
13  
14  
15  
16  
17  
18  
19  
20  
21  
22  
23  
24  
25  
26  
27  
28  
29  
30  
31  
32  
33  
34  
35  
36  
37  
38  
39  
40  
41  
42  
43  
44  
45  
46  
47  
48  
49  
50  
51  
52  
53  
54  
55  
56  
57  
58  
59  
60

| <b>Controls (n = 24106)</b> |          |                           |          |
|-----------------------------|----------|---------------------------|----------|
|                             | <b>%</b> | <b>Number of outliers</b> | <b>%</b> |
|                             | 2.0      | 389                       | 1.6      |
|                             | 0.2      | 50                        | 0.2      |
|                             | 4.3      | 79                        | 0.3      |
|                             | 1.8      | 423                       | 1.8      |
|                             | 0.4      | 338                       | 1.4      |
|                             | 0.5      | 172                       | 0.7      |

For peer review only

## Sensitivity analysis after exclusion of outlier values

|                          | <u>ANOVA</u>   |                |                | <u>Post-hoc Dunnett</u>    |
|--------------------------|----------------|----------------|----------------|----------------------------|
|                          | <u>F value</u> | <u>P value</u> | <u>P_FDR</u>   | <u>Oral GC vs. control</u> |
|                          |                |                |                | <u>Estimate</u>            |
| Reaction time            | 1.0            | 0.379          | 0.45           |                            |
| Fluid intelligence score | 0.8            | 0.446          | 0.45           |                            |
| Digit span               | 3.1            | 0.047          | 0.070          |                            |
| Trail making A           | 5.2            | 0.0057         | <b>0.011</b>   | -0.10                      |
| Trail making B           | 9.6            | 6.8E-05        | <b>2.0E-04</b> | -0.16                      |
| Symbol substitution      | 11.6           | 8.9E-06        | <b>5.3E-05</b> | -0.18                      |

For peer review only

nett's testontrolsInhalation GC vs. controls

|  | Lower CI | Upper CI | P value     | Estimate | Lower CI | Upper CI |
|--|----------|----------|-------------|----------|----------|----------|
|  | -0.25    | 0.05     | 0.25        | -0.02    | -0.12    | 0.09     |
|  | -0.32    | -0.01    | <b>0.04</b> | -0.06    | -0.17    | 0.04     |
|  | -0.34    | -0.02    | <b>0.02</b> | -0.05    | -0.16    | 0.06     |

For peer review only

1  
2  
3  
4  
5  
6  
7  
8 **P value**  
9  
10  
11  
12  
13 0.88  
14 0.31  
15 0.55  
16  
17  
18  
19  
20  
21  
22  
23  
24  
25  
26  
27  
28  
29  
30  
31  
32  
33  
34  
35  
36  
37  
38  
39  
40  
41  
42  
43  
44  
45  
46  
47  
48  
49  
50  
51  
52  
53  
54  
55  
56  
57  
58  
59  
60

For peer review only

## Mediation analysis for total body fat percentage

| Region                                |                     | Estimate |
|---------------------------------------|---------------------|----------|
| Caudate, subcortical volume           | ACME                | -1.2     |
|                                       | ADE                 | 78.5     |
|                                       | Total effect        | 77.4     |
|                                       | Proportion mediated | 0.0      |
| Amygdala, regional grey matter volume | ACME                | -1.2     |
|                                       | ADE                 | 1.2      |
|                                       | Total effect        | -0.1     |
|                                       | Proportion mediated | 17.7     |
| Caudate, regional grey matter volume  | ACME                | -0.9     |
|                                       | ADE                 | 184.0    |
|                                       | Total effect        | 183.0    |
|                                       | Proportion mediated | 0.0      |
| Global FA                             | ACME                | -2.5E-05 |
|                                       | ADE                 | -3.8E-03 |
|                                       | Total effect        | -3.8E-03 |
|                                       | Proportion mediated | 6.6E-03  |
| Global MD                             | ACME                | -4.8E-08 |
|                                       | ADE                 | 7.5E-06  |
|                                       | Total effect        | 7.5E-06  |
|                                       | Proportion mediated | -6.4E-03 |

ACME, average causal mediation effects; ADE, average direct effects.

|    | Lower CI | Upper CI | P value | Total sample size used |
|----|----------|----------|---------|------------------------|
| 6  | -3.7     | 1.0      | 0.27    | 23338                  |
| 7  | 31.2     | 124.6    | <2e-16  |                        |
| 8  | 30.0     | 123.3    | <2e-16  |                        |
| 10 | -0.1     | 0.0      | 0.27    |                        |
| 12 | -3.6     | 1.0      | 0.29    | 23338                  |
| 13 | -24.2    | 26.7     | 0.93    |                        |
| 14 | -25.7    | 26.0     | 0.98    |                        |
| 16 | -1.9     | 1.9      | 0.94    |                        |
| 19 | -3.1     | 0.7      | 0.27    | 23338                  |
| 20 | 79.4     | 293.5    | <2e-16  |                        |
| 21 | 77.9     | 293.0    | <2e-16  |                        |
| 22 | 0.0      | 0.0      | 0.27    |                        |
| 25 | -8.6E-05 | 0        | 0.3     | 23338                  |
| 26 | -6.3E-03 | 0        | <2e-16  |                        |
| 27 | -6.4E-03 | 0        | <2e-16  |                        |
| 28 | -5.5E-03 | 4.0E-02  | 0.3     |                        |
| 31 | -1.5E-07 | 0        | 0.31    | 23338                  |
| 32 | 3.7E-06  | 0        | <2e-16  |                        |
| 33 | 3.7E-06  | 0        | <2e-16  |                        |
| 34 | -2.5E-02 | 1.0E-02  | 0.31    |                        |



1  
2  
3 **Supplements**

4  
5 Supplements 1, 2 and 3 are separate files.  
6  
7  
8  
9  
10  
11  
12  
13  
14  
15  
16  
17  
18  
19  
20  
21  
22  
23  
24  
25  
26  
27  
28  
29  
30  
31  
32  
33  
34  
35  
36  
37  
38  
39  
40  
41  
42  
43  
44  
45  
46  
47  
48  
49  
50  
51  
52  
53  
54  
55  
56  
57  
58  
59  
60

For peer review only

**Supplement 4.** Characteristics of included chronic glucocorticoid users and controls

|                                                    | Patients using chronic oral GC<br>(n = 42) | Patients using chronic inhalation GC<br>(n = 305) | Controls (n = 24106) | P value |
|----------------------------------------------------|--------------------------------------------|---------------------------------------------------|----------------------|---------|
| <b>Sex: male, n (%)</b>                            | 22 (52.4%)                                 | 137 (44.9%)                                       | 12154 (50.4%)        | 0.15    |
| <b>Age at time of scanning in years, mean (SD)</b> | 65.2 (7.0)                                 | 63.0 (7.6)                                        | 63.5 (7.5)           | 0.19    |
| <b>Education level, n (%)</b>                      |                                            |                                                   |                      | 0.81    |
| College/University degree                          | 24 (57.1)                                  | 171 (56.1)                                        | 12058 (50.0)         |         |
| A levels or equivalent                             | 6 (14.3)                                   | 38 (12.5)                                         | 2930 (12.2)          |         |
| O levels/GCSE or equivalent                        | 4 (9.5)                                    | 44 (14.4)                                         | 4155 (17.2)          |         |
| CSEs or equivalent                                 | 1 (2.4)                                    | 9 (3.0)                                           | 879 (3.6)            |         |
| NVQ, HND, HNC, or equivalent                       | 1 (2.4)                                    | 14 (4.6)                                          | 1396 (5.8)           |         |
| Other professional qualifications                  | 2 (4.8)                                    | 14 (4.6)                                          | 1150 (4.8)           |         |
| None of the above                                  | 1 (2.4)                                    | 14 (4.6)                                          | 1311 (5.4)           |         |
| Missing                                            | 3 (7.1)                                    | 1 (0.3)                                           | 227 (0.9)            |         |
| <b>BMI in kg/m<sup>2</sup>, mean (SD)</b>          | 25.9 (3.7)                                 | 26.6 (4.4)                                        | 26.1 (4.1)           | 0.15    |
| Number (%) missing                                 | 1 (2.4)                                    | 14 (4.6)                                          | 1325 (5.5)           |         |
| <b>Body fat percentage, mean (SD)</b>              | 30.0 (6.4)                                 | 32.0 (8.1)                                        | 30.2 (7.9)           | 4.6e-4  |
| Number (%) missing                                 | 1 (2.4)                                    | 14 (4.6)                                          | 1331 (5.5)           |         |
| <b>Smoking status, n (%)</b>                       |                                            |                                                   |                      | 0.42    |
| Current                                            | 1 (2.4)                                    | 6 (2.0)                                           | 647 (2.7)            |         |
| Previous                                           | 8 (19.0)                                   | 112 (36.7)                                        | 7858 (32.6)          |         |
| Never                                              | 31 (73.8)                                  | 206 (67.5)                                        | 15380 (63.8)         |         |
| Missing                                            | 2 (4.8)                                    | 2 (0.7)                                           | 221 (0.9)            |         |

1  
2  
3 BMI, body mass index; GC, glucocorticoids; n, number; SD, standard deviation.

4  
5 P values were determined using analysis of variance (for continuous variables) and Fisher's exact test (for categorical variables, because of the low number  
6  
7 of patients using chronic glucocorticoids).

8  
9  
10  
11  
12  
13  
14  
15  
16  
17  
18  
19  
20  
21  
22  
23  
24  
25  
26  
27  
28  
29  
30  
31  
32  
33  
34  
35  
36  
37  
38  
39  
40  
41  
42  
43  
44  
45  
46

For peer review only

**Supplement 5.** Imaging parameters, presented as the adjusted mean difference of patients using chronic oral glucocorticoids (n = 42) or chronic inhalation glucocorticoids (n = 305) compared to controls (n = 24106)

|                                                         | ANOVA   |         |                  | Oral GC vs. controls |               |         | Inhalation GC vs. controls |             |         |
|---------------------------------------------------------|---------|---------|------------------|----------------------|---------------|---------|----------------------------|-------------|---------|
|                                                         | F value | P value | P <sub>FDR</sub> | AMD*                 | 95% CI        | P value | AMD*                       | 95% CI      | P value |
| <b><i>Volumetric measures</i></b>                       |         |         |                  |                      |               |         |                            |             |         |
| <i>Global volumes (in mm<sup>3</sup>)</i>               |         |         |                  |                      |               |         |                            |             |         |
| Total brain volume                                      | 17.0    | 4.1e-8  | <b>1.5e-6</b>    | -2535                | -18869; 13798 | 0.90    | 3553                       | -2340; 9445 | 0.31    |
| Grey matter volume                                      | 12.2    | 5.0e-6  | <b>9.1e-5</b>    | -1552                | -10808; 7703  | 0.89    | 1636                       | -1703; 4975 | 0.45    |
| White matter volume                                     | 10.8    | 2.0e-5  | <b>1.8e-4</b>    | -984                 | -11702; 9735  | 0.96    | 1917                       | -1950; 5784 | 0.44    |
| Peripheral cortex                                       | 8.5     | 2.1e-4  | <b>9.4e-4</b>    | -2152                | -10481; 6177  | 0.78    | 940                        | -2065; 3945 | 0.70    |
| CSF volume                                              | 3.0     | 5.2e-2  | <b>7.4e-2</b>    | -2408                | -7198; 2381   | 0.43    | 154                        | -1573; 1882 | 0.96    |
| <i>Subcortical volumes (in mm<sup>3</sup>)</i>          |         |         |                  |                      |               |         |                            |             |         |
| Amygdala                                                | 5.8     | 2.9e-3  | <b>8.2e-3</b>    | 52.1                 | -19.3; 123.5  | 0.19    | -20.6                      | -46.4; 5.2  | 0.14    |
| Caudate                                                 | 7.2     | 7.6e-4  | <b>2.9e-3</b>    | 112.7                | -12.9; 238.2  | 0.09    | -5.0                       | -50.3; 40.3 | 0.95    |
| Hippocampus                                             | 4.9     | 7.8e-3  | <b>1.7e-2</b>    | 59.2                 | -79.1; 197.5  | 0.54    | -38.4                      | -88.3; 11.5 | 0.16    |
| Pallidum                                                | 7.1     | 7.9e-4  | <b>2.9e-3</b>    | 4.01                 | -68.2; 76.2   | 0.98    | -23.0                      | -49.0; 3.1  | 0.094   |
| Putamen                                                 | 5.0     | 6.9e-3  | <b>1.6e-2</b>    | -65.4                | -222.8; 92.0  | 0.55    | -26.1                      | -82.9; 30.7 | 0.49    |
| Thalamus                                                | 6.7     | 1.3e-3  | <b>4.1e-3</b>    | 61.9                 | -120.7; 244.5 | 0.66    | -11.6                      | -77.5; 54.3 | 0.88    |
| <i>Regional grey matter volumes (in mm<sup>3</sup>)</i> |         |         |                  |                      |               |         |                            |             |         |
| Amygdala                                                | 10.1    | 4.2e-5  | <b>3.0e-4</b>    | 4.8                  | -60.8; 70.3   | 0.97    | -15.1                      | -38.8; 8.5  | 0.27    |
| Cerebellum                                              | 4.1     | 1.6e-2  | <b>2.9e-2</b>    | 25.7                 | -76.5; 127.9  | 0.79    | 4.4                        | -32.4; 41.3 | 0.94    |
| Cingulate gyrus, posterior                              | 4.2     | 1.6e-2  | <b>2.9e-2</b>    | 36.0                 | -158.8; 230.7 | 0.87    | 25.5                       | -44.8; 95.8 | 0.63    |

1  
2  
3  
4  
5  
6  
7  
8  
9  
10  
11  
12  
13  
14  
15  
16  
17  
18  
19  
20  
21  
22  
23  
24  
25  
26  
27  
28  
29  
30  
31  
32  
33  
34  
35  
36  
37  
38  
39  
40  
41  
42  
43  
44  
45  
46

|                              |      |        |               |         |                 |               |         |                  |               |
|------------------------------|------|--------|---------------|---------|-----------------|---------------|---------|------------------|---------------|
| Hippocampus                  | 9.1  | 1.1e-4 | <b>6.6e-4</b> | 63.5    | -52.4; 179.5    | 0.37          | -24.3   | -66.1; 17.6      | 0.34          |
| Precuneal cortex             | 8.6  | 1.8e-4 | <b>9.1e-4</b> | 170.0   | -201.0; 541.2   | 0.49          | -59.9   | -194.0; 74.1     | 0.51          |
| <b>DTI measures</b>          |      |        |               |         |                 |               |         |                  |               |
| <i>Fractional anisotropy</i> |      |        |               |         |                 |               |         |                  |               |
| Global                       | 5.4  | 4.4e-3 | <b>1.1e-2</b> | -0.0066 | -0.013; -3.2e-4 | <b>0.038</b>  | -0.0025 | -0.0048; -2.3e-4 | <b>0.027</b>  |
| Genu of corpus callosum      | 5.8  | 3.2e-3 | <b>8.2e-3</b> | -0.014  | -0.025; -0.0031 | <b>0.0087</b> | -0.0020 | -0.0060; 0.0020  | 0.44          |
| Cingulum hippocampus         | 3.7  | 2.4e-2 | <b>3.9e-2</b> | 0.0032  | -0.0078; 0.014  | 0.73          | -0.0034 | -0.0074; 6.4e-4  | 0.11          |
| <i>Mean diffusivity</i>      |      |        |               |         |                 |               |         |                  |               |
| Global                       | 4.7  | 9.5e-3 | <b>1.9e-2</b> | 9.4e-6  | 8.7e-8; 1.9e-5  | <b>0.05</b>   | 2.6e-6  | -7.7e-7; 6.0e-6  | 0.16          |
| Genu of corpus callosum      | 6.3  | 1.8e-3 | <b>5.3e-3</b> | 2.0e-5  | 5.5e-6; 3.5e-5  | <b>0.0043</b> | 2.8e-6  | -2.5e-6; 8.0e-6  | 0.40          |
| Splenium of corpus callosum  | 3.9  | 2.0e-2 | <b>3.5e-2</b> | 8.1e-6  | -2.4e-6; 1.9e-5 | 0.16          | 5.2e-6  | 1.4e-6; 9.0e-6   | <b>0.0044</b> |
| Cingulum hippocampus         | 11.6 | 9.0e-6 | <b>1.1e-4</b> | 8.2e-6  | -2.4e-6; 1.9e-5 | 0.16          | 6.3e-6  | 2.5e-6; 1.0e-5   | <b>5.0e-4</b> |

\* Adjusted mean difference, calculated using linear models, adjusted for age, sex, education, X-, Y-, and Z-position of the head in the scanner, head size, assessment centre, and year of imaging acquisition.

CI, confidence interval; P<sub>FDR</sub>, Benjamini-Hochberg false discovery rate corrected P values; SE, standard error. P values in bold are statistically significant (P < 0.05).

**Supplement 6.** Cognitive outcome measures of chronic oral glucocorticoid users (n = 42) and chronic inhalation glucocorticoid users (n = 305) vs. controls

|                            | ANOVA   |         |                  | Oral GC vs. controls |             | Inhalation GC vs. controls |       |             | Participants with available data, n (%) |         |               |            |
|----------------------------|---------|---------|------------------|----------------------|-------------|----------------------------|-------|-------------|-----------------------------------------|---------|---------------|------------|
|                            | F value | P value | P <sub>FDR</sub> | AMD*                 | 95% CI      | P value                    | AMD*  | 95% CI      | P value                                 | Oral GC | Inhalation GC | Controls   |
| <b>Trail making A</b>      | 0.41    | 0.66    | 0.84             | 0.12                 | -0.26; 0.51 | 0.69                       | -0.07 | -0.24; 0.10 | 0.55                                    | 30 (71) | 151 (50)      | 16419 (68) |
| <b>Trail making B</b>      | 0.28    | 0.75    | 0.84             | -0.08                | -0.47; 0.31 | 0.84                       | 0.00  | -0.17; 0.17 | 1.00                                    | 28 (67) | 148 (49)      | 16071 (67) |
| <b>Symbol substitution</b> | 0.35    | 0.70    | 0.84             | -0.08                | -0.45; 0.30 | 0.84                       | -0.05 | -0.21; 0.11 | 0.71                                    | 30 (71) | 151 (50)      | 16442 (68) |

\* Adjusted mean difference between patients and controls, expressed in Z scores. Calculated using linear models, adjusting for age, sex, and education.

Trail making A, and trail making B were log transformed before generation of Z scores because they were non-normally distributed. Variables were transformed such that higher values indicate a better performance.

CI, confidence interval; GC, glucocorticoids; n, number; P<sub>FDR</sub>, Benjamini-Hochberg false discovery rate corrected P values

**Supplement 7.** Self-reported frequency of mental health parameters in the past two weeks of patients using oral glucocorticoids (n = 222) or inhalation glucocorticoids (n = 557) and controls, presented as number of participants (%) per category

|                               | Oral GC (n=222) | Inhalation GC (n=557) | Controls (n=24106) |
|-------------------------------|-----------------|-----------------------|--------------------|
| <b>Depressed mood</b>         |                 |                       |                    |
| Not at all                    | 170 (77)        | 455 (82)              | 19940 (83)         |
| Several days                  | 39 (18)         | 77 (14)               | 3017 (13)          |
| More than half of the days    | 6 (2.7)         | 8 (1.4)               | 296 (1.2)          |
| Nearly every day              | 1 (0.5)         | 3 (0.5)               | 150 (0.6)          |
| Missing                       | 6 (2.7)         | 14 (2.5)              | 703 (2.9)          |
| <b>Disinterest</b>            |                 |                       |                    |
| Not at all                    | 174 (78)        | 468 (84)              | 20536 (85)         |
| Several days                  | 34 (15)         | 61 (11)               | 2568 (11)          |
| More than half of the days    | 3 (1.3)         | 7 (1.3)               | 292 (1.2)          |
| Nearly every day              | 5 (2.3)         | 5 (0.9)               | 174 (0.7)          |
| Missing                       | 6 (2.7)         | 16 (2.9)              | 536 (2.2)          |
| <b>Tenseness/restlessness</b> |                 |                       |                    |
| Not at all                    | 162 (73)        | 437 (78)              | 19412 (81)         |
| Several days                  | 46 (21)         | 89 (16)               | 3630 (15)          |
| More than half of the days    | 3 (1.3)         | 12 (2.2)              | 272 (1.1)          |
| Nearly every day              | 5 (2.3)         | 5 (0.9)               | 126 (0.5)          |
| Missing                       | 6 (2.7)         | 14 (2.5)              | 666 (2.8)          |
| <b>Tiredness/lethargy</b>     |                 |                       |                    |
| Not at all                    | 95 (43)         | 280 (50)              | 13792 (57)         |
| Several days                  | 91 (41)         | 221 (40)              | 8345 (35)          |
| More than half of the days    | 9 (4.1)         | 32 (5.7)              | 815 (3.4)          |
| Nearly every day              | 19 (8.6)        | 15 (2.7)              | 555 (2.3)          |
| Missing                       | 8 (3.6)         | 9 (1.6)               | 599 (2.5)          |

GC, glucocorticoids; n, number.

**Supplement 8.** Self-reported frequency of mental health parameters in the past two weeks of chronic oral glucocorticoid users (n = 42), chronic inhalation glucocorticoid users (n = 305) and controls, presented as number of participants (%) per category

|                               | Oral GC (n = 42) | Inhalation GC (n = 305) | Controls (n = 24106) |
|-------------------------------|------------------|-------------------------|----------------------|
| <b>Depressed mood</b>         |                  |                         |                      |
| Not at all                    | 33 (79)          | 257 (84)                | 19940 (83)           |
| Several days                  | 6 (14)           | 35 (11)                 | 3017 (13)            |
| More than half of the days    | 0 (0)            | 3 (0.9)                 | 296 (1.2)            |
| Nearly every day              | 0 (0)            | 1 (0.3)                 | 150 (0.6)            |
| Missing                       | 3 (7.1)          | 9 (3.0)                 | 703 (2.9)            |
| <b>Disinterest</b>            |                  |                         |                      |
| Not at all                    | 34 (81)          | 267 (88)                | 20536 (85)           |
| Several days                  | 6 (14)           | 30 (9.8)                | 2568 (11)            |
| More than half of the days    | 0 (0)            | 1 (0.3)                 | 292 (1.2)            |
| Nearly every day              | 0 (0)            | 0 (0)                   | 174 (0.7)            |
| Missing                       | 2 (4.8)          | 7 (2.3)                 | 536 (2.2)            |
| <b>Tenseness/restlessness</b> |                  |                         |                      |
| Not at all                    | 30 (71)          | 245 (80)                | 19412 (81)           |
| Several days                  | 10 (24)          | 48 (16)                 | 3630 (15)            |
| More than half of the days    | 0 (0)            | 6 (2.0)                 | 272 (1.1)            |
| Nearly every day              | 0 (0)            | 1 (0.3)                 | 126 (0.5)            |
| Missing                       | 2 (4.8)          | 5 (1.6)                 | 666 (2.8)            |
| <b>Tiredness/lethargy</b>     |                  |                         |                      |
| Not at all                    | 24 (57)          | 156 (51)                | 13792 (57)           |
| Several days                  | 12 (29)          | 121 (40)                | 8345 (35)            |
| More than half of the days    | 2 (4.8)          | 14 (4.6)                | 815 (3.4)            |
| Nearly every day              | 2 (4.8)          | 8 (2.6)                 | 555 (2.3)            |
| Missing                       | 2 (4.8)          | 6 (2.0)                 | 599 (2.5)            |

GC, glucocorticoids; n, number.



**Supplement 9.** Likelihood of experiencing mental health complaints in the past two weeks of chronic oral glucocorticoid users (n = 42) and chronic inhalation glucocorticoid users (n = 305) compared to controls

|                    | Likelihood ratio test |             |                  | Oral GC vs. controls |            | Inhalation GC vs. controls |      |            |               |
|--------------------|-----------------------|-------------|------------------|----------------------|------------|----------------------------|------|------------|---------------|
|                    | X <sup>2</sup>        | P value     | P <sub>FDR</sub> | OR                   | 95% CI     | P value                    | OR   | 95% CI     | P value       |
| <b>Depression</b>  | 1.1                   | 0.57        | 0.57             | 1.21                 | 0.45; 2.73 | 0.67                       | 0.85 | 0.59; 1.18 | 0.34          |
| <b>Disinterest</b> | 2.2                   | 0.33        | 0.44             | 1.41                 | 0.53; 3.17 | 0.44                       | 0.79 | 0.53; 1.13 | 0.21          |
| <b>Tenseness</b>   | 2.5                   | 0.28        | 0.44             | 1.84                 | 0.84; 3.68 | 0.10                       | 1.05 | 0.78; 1.40 | 0.73          |
| <b>Tiredness</b>   | 4.4                   | <b>0.11</b> | 0.44             | 0.96                 | 0.49; 1.84 | 0.91                       | 1.28 | 1.01; 1.61 | <b>0.0037</b> |

Calculated using logistic regression analysis, adjusting for age, sex, and education. P values in bold are statistically significant after Bonferroni correction for family-wise error rate of two tests (P < 0.025).

CI, confidence interval; GC, glucocorticoids; OR, odds ratio; P<sub>FDR</sub>, Benjamini-Hochberg false discovery rate corrected P values.

**Supplement 10.** Sensitivity analysis: Characteristics of included glucocorticoid users and controls (without exclusion of participants based on psychiatric, neurological, or endocrine history or medication use)

|                                                    | Patients using oral GC (n = 312) | Patients using inhalation GC (n = 806) | Controls (n = 36310) | P value |
|----------------------------------------------------|----------------------------------|----------------------------------------|----------------------|---------|
| <b>Sex: male, n (%)</b>                            | 145 (46.5)                       | 344 (42.7)                             | 17041 (46.9)         | 0.057   |
| <b>Age at time of scanning in years, mean (SD)</b> | 66.1 (6.9)                       | 62.8 (7.5)                             | 63.7 (7.5)           | 3.6e-10 |
| <b>Education level, n (%)</b>                      |                                  |                                        |                      | 0.37    |
| College/University degree                          | 143 (45.8)                       | 407 (50.5)                             | 17637 (48.6)         |         |
| A levels or equivalent                             | 39 (12.5)                        | 98 (12.2)                              | 4392 (12.1)          |         |
| O levels/GCSE or equivalent                        | 53 (17.0)                        | 136 (16.9)                             | 6400 (17.6)          |         |
| CSEs or equivalent                                 | 13 (4.2)                         | 26 (3.2)                               | 1372 (3.8)           |         |
| NVQ, HND, HNC, or equivalent                       | 11 (3.5)                         | 50 (6.2)                               | 2142 (5.9)           |         |
| Other professional qualifications                  | 21 (6.7)                         | 45 (5.6)                               | 1795 (4.9)           |         |
| None of the above                                  | 27 (8.7)                         | 40 (5.0)                               | 2208 (6.1)           |         |
| Missing                                            | 5 (1.6)                          | 4 (0.5)                                | 364 (1.0)            |         |
| <b>BMI in kg/m<sup>2</sup>, mean (SD)</b>          | 26.7 (4.4)                       | 27.1 (4.7)                             | 26.5 (4.4)           | 2.2e-4  |
| Number (%) missing                                 | 11 (3.5)                         | 31 (3.8)                               | 1932 (5.3)           |         |
| <b>Body fat percentage, mean (SD)</b>              | 31.9 (8.2)                       | 32.6 (8.4)                             | 31.1 (8.1)           | 5.5e-7  |
| Number (%) missing                                 | 11 (3.5)                         | 31 (3.8)                               | 1942 (5.3)           |         |
| <b>Smoking status, n (%)</b>                       |                                  |                                        |                      | 0.096   |
| Current                                            | 10 (3.2)                         | 25 (3.1)                               | 1231 (3.3)           |         |
| Previous                                           | 118 (37.8)                       | 299 (37.1)                             | 12063 (33.2)         |         |
| Never                                              | 181 (58.0)                       | 477 (59.2)                             | 22661 (62.4)         |         |
| Missing                                            | 3 (1.0)                          | 5 (0.6)                                | 355 (1.0)            |         |

1  
2  
3 BMI, body mass index; GC, glucocorticoids; n, number; SD, standard deviation.

4  
5 P values determined using analysis of variance (for continuous variables) and Pearson's Chi squared test (for categorical variables).  
6  
7  
8  
9  
10  
11  
12  
13  
14  
15  
16  
17  
18  
19  
20  
21  
22  
23  
24  
25  
26  
27  
28  
29  
30  
31  
32  
33  
34  
35  
36  
37  
38  
39  
40  
41  
42  
43  
44  
45  
46

For peer review only

**Supplement 11.** Sensitivity analysis: Imaging parameters, presented as the adjusted mean difference of patients using oral glucocorticoids (n = 312) or inhalation glucocorticoids (n = 806) compared to controls (n = 36310) (without exclusion of participants based on psychiatric, neurological, or endocrine history or medication use)

|                                                         | ANOVA   |         |                  | Oral GC vs. controls |             |               | Inhalation GC vs. controls |             |               |
|---------------------------------------------------------|---------|---------|------------------|----------------------|-------------|---------------|----------------------------|-------------|---------------|
|                                                         | F value | P value | P <sub>FDR</sub> | AMD*                 | 95% CI      | P value       | AMD*                       | 95% CI      | P value       |
| <b><i>Volumetric measures</i></b>                       |         |         |                  |                      |             |               |                            |             |               |
| <i>Global volumes (in mm<sup>3</sup>)</i>               |         |         |                  |                      |             |               |                            |             |               |
| Total brain volume                                      | 17.7    | 2.2e-8  | <b>1.3e-7</b>    | -3460                | -9320; 2400 | 0.32          | 3535                       | -121; 7190  | 0.060         |
| Grey matter volume                                      | 22.3    | 2.0e-10 | <b>2.4e-9</b>    | -2224                | -5577; 1130 | 0.25          | 1454                       | -637; 3546  | 0.22          |
| White matter volume                                     | 5.5     | 4.1e-3  | <b>6.7e-3</b>    | -1237                | -5078; 2604 | 0.69          | 2080                       | -316; 4476  | 0.10          |
| Peripheral cortex                                       | 24.6    | 2.0e-11 | <b>4.4e-10</b>   | -3318                | -6330; -307 | <b>0.028</b>  | 1172                       | -706; 3051  | 0.29          |
| CSF volume                                              | 14.2    | 7.1e-7  | <b>2.3e-6</b>    | 1220                 | -518; 2958  | 0.12          | 223                        | -861; 1307  | 0.65          |
| <i>Subcortical volumes (in mm<sup>3</sup>)</i>          |         |         |                  |                      |             |               |                            |             |               |
| Accumbens                                               | 10.2    | 3.8e-5  | <b>1.0e-4</b>    | -8.9                 | -20.4; 2.7  | 0.16          | -3.7                       | -10.9; 3.5  | 0.41          |
| Caudate                                                 | 4.5     | 1.1e-2  | <b>1.7e-2</b>    | 58.6                 | 13.8; 103.5 | <b>0.0072</b> | -5.9                       | -33.9; 22.1 | 0.84          |
| Pallidum                                                | 6.9     | 1.0e-3  | <b>1.9e-3</b>    | 1.2                  | -24.5; 27.0 | 0.99          | -16.2                      | -32.3; -0.2 | <b>0.047</b>  |
| Putamen                                                 | 9.8     | 5.6e-5  | <b>1.5e-4</b>    | -33.8                | -90.5; 22.9 | 0.32          | -20.1                      | -55.5; 15.3 | 0.35          |
| Thalamus                                                | 9.3     | 9.4e-5  | <b>2.3e-4</b>    | -19.9                | -86.2; 46.5 | 0.72          | -10.7                      | -52.1; 30.7 | 0.78          |
| <i>Regional grey matter volumes (in mm<sup>3</sup>)</i> |         |         |                  |                      |             |               |                            |             |               |
| Amygdala                                                | 21.0    | 7.8e-10 | <b>7.0e-9</b>    | -6.7                 | -30.4; 17.1 | 0.75          | -21.7                      | -36.5; -6.8 | <b>0.0023</b> |
| Caudate                                                 | 12.3    | 4.7e-6  | <b>1.4e-5</b>    | 149.6                | 66.9; 232.4 | <b>1.0e-4</b> | 42.9                       | -8.7; 94.5  | 0.12          |
| Cerebellum                                              | 5.8     | 3.1e-3  | <b>5.2e-3</b>    | 17.8                 | -19.4; 54.9 | 0.47          | -2.9                       | -26.1; 20.3 | 0.93          |

|                              |      |         |                |         |                  |               |         |                  |               |
|------------------------------|------|---------|----------------|---------|------------------|---------------|---------|------------------|---------------|
| Insular cortex               | 8.7  | 1.7e-4  | <b>3.5e-4</b>  | -42.1   | -103.5; 19.4     | 0.23          | 8.0     | -30.3; 46.3      | 0.84          |
| Precuneal cortex             | 4.0  | 1.9e-2  | <b>2.7e-2</b>  | -9.7    | -142.8; 123.4    | 0.97          | -1.7    | -84.7; 81.3      | 1.00          |
| <b>DTI measures</b>          |      |         |                |         |                  |               |         |                  |               |
| <i>Fractional anisotropy</i> |      |         |                |         |                  |               |         |                  |               |
| Global                       | 15.5 | 1.8e-7  | <b>9.4e-7</b>  | -0.0031 | -0.0055; -7.5e-4 | <b>0.0066</b> | -0.0015 | -0.0030; -4.9e-5 | <b>0.041</b>  |
| Body of corpus callosum      | 8.9  | 1.4e-4  | <b>3.1e-4</b>  | -0.0039 | -0.0076; -0.0003 | <b>0.032</b>  | -0.0014 | -0.0036; 8.9e-4  | 0.30          |
| Genu of corpus callosum      | 15.2 | 2.5e-7  | <b>1.1e-6</b>  | -0.0056 | -0.0097; -0.0014 | <b>0.0055</b> | -0.0013 | -0.0039; 0.0013  | 0.44          |
| Cingulum cingulate           | 3.8  | 2.3e-2  | <b>3.1e-2</b>  | -0.0014 | -0.0052; 0.0025  | 0.64          | -0.0018 | -0.0042; 5.9e-4  | 0.17          |
| <i>Mean diffusivity</i>      |      |         |                |         |                  |               |         |                  |               |
| Global                       | 24.5 | 2.4e-11 | <b>4.4e-10</b> | 6.6e-6  | 3.0e-6; 1.0e-5   | <b>3.7e-5</b> | 1.9e-6  | -3.2e-7; 4.1e-6  | 5.7e-2        |
| Body of corpus callosum      | 14.2 | 6.7e-7  | <b>2.3e-6</b>  | 6.7e-6  | 1.9e-6; 1.1e-5   | <b>0.0034</b> | 4.0e-6  | 1.1e-6; 7.0e-6   | <b>0.0048</b> |
| Genu of corpus callosum      | 17.9 | 1.7e-8  | <b>1.2e-7</b>  | 8.0e-6  | 2.5e-6; 1.4e-5   | <b>0.0023</b> | 3.3e-6  | -1.4e-7; 6.7e-6  | 0.0622        |
| Splenium of corpus callosum  | 6.7  | 1.2e-3  | <b>2.2e-3</b>  | 3.7e-6  | -3.1e-7; 7.6e-6  | 0.076         | 4.0e-6  | 1.5e-6; 6.4e-6   | <b>7.0e-4</b> |
| Cingulum cingulate           | 4.9  | 7.6e-3  | <b>1.2e-2</b>  | 2.5e-6  | -6.8e-7; 5.7e-6  | 0.15          | 2.2e-6  | 2.2e-7; 4.2e-6   | <b>0.026</b>  |
| Cingulum hippocampus         | 14.5 | 4.9e-7  | <b>2.0e-6</b>  | 2.6e-6  | -1.3e-6; 6.6e-6  | 0.25          | 4.5e-6  | 2.0e-6; 7.0e-6   | <b>1.0e-4</b> |
| Uncinate fasciculus          | 7.3  | 6.6e-4  | <b>1.3e-3</b>  | 4.0e-6  | 2.9e-7; 7.7e-6   | <b>0.032</b>  | 1.6e-6  | -7.5e-7; 3.9e-6  | 0.23          |

\* Adjusted mean difference, calculated using linear models, adjusted for age, sex, education, X-, Y-, and Z-position of the head in the scanner, head size, assessment centre, and year of imaging acquisition.

$P_{FDR}$ , Benjamini-Hochberg false discovery rate corrected P values; SE, standard error. P values in bold are statistically significant ( $P < 0.05$ ).

**Supplement 12.** Sensitivity analysis: Cognitive outcome measures of oral glucocorticoid users (n = 312) and inhalation glucocorticoid users (n = 806) vs. controls (n = 36310) (without exclusion of participants based on psychiatric, neurological, or endocrine history or medication use)

|                            | ANOVA   |         |                  | Oral GC vs. controls |              | Inhalation GC vs. controls |        |             | Participants with available data, n (%) |          |               |            |
|----------------------------|---------|---------|------------------|----------------------|--------------|----------------------------|--------|-------------|-----------------------------------------|----------|---------------|------------|
|                            | F value | P value | P <sub>FDR</sub> | AMD*                 | 95% CI       | P value                    | AMD*   | 95% CI      | P value                                 | Oral GC  | Inhalation GC | Controls   |
| <b>Trail making A</b>      | 6.6     | 0.0014  | <b>0.0028</b>    | -0.11                | -0.26; 0.03  | 0.16                       | 0.020  | -0.08; 0.12 | 0.86                                    | 206 (66) | 422 (52)      | 24297 (67) |
| <b>Trail making B</b>      | 6.7     | 0.0013  | <b>0.0028</b>    | -0.12                | -0.27; 0.02  | 0.10                       | -0.018 | -0.12; 0.08 | 0.88                                    | 194 (62) | 415 (51)      | 23273 (64) |
| <b>Symbol substitution</b> | 9.7     | 6.2e-5  | <b>0.00037</b>   | -0.15                | -0.29; -0.01 | <b>0.029</b>               | -0.061 | -0.16; 0.04 | 0.28                                    | 203 (65) | 423 (52)      | 24337 (67) |

\* Adjusted mean difference between patients and controls, expressed in Z scores. Calculated using linear models, adjusted for age, sex, and education. Trail making A, and trail making B were log transformed before generation of Z scores because they were non-normally distributed. Variables were transformed such that higher values indicate a better performance.

GC, glucocorticoids; P<sub>FDR</sub>, Benjamini-Hochberg false discovery rate corrected P values.

**Supplement 13.** Sensitivity analysis: Self-reported frequency of mental health parameters in the past two weeks of patients using oral glucocorticoids (n = 312) or inhalation glucocorticoids (n = 806) and controls, presented as number of participants (%) per category (without exclusion of participants based on psychiatric, neurological, or endocrine history or medication use)

|                               | Oral GC (n = 312) | Inhalation GC (n = 806) | Controls (n = 36310) |
|-------------------------------|-------------------|-------------------------|----------------------|
| <b>Depressed mood</b>         |                   |                         |                      |
| Not at all                    | 240 (76.9)        | 620 (76.9)              | 29014 (80.0)         |
| Several days                  | 55 (17.6)         | 139 (17.2)              | 5197 (14.3)          |
| More than half of the days    | 8 (2.6)           | 14 (1.7)                | 593 (1.6)            |
| Nearly every day              | 2 (0.6)           | 14 (1.7)                | 360 (1.0)            |
| Missing                       | 7 (2.2)           | 19 (2.4)                | 1146 (3.2)           |
| <b>Disinterest</b>            |                   |                         |                      |
| Not at all                    | 237 (76.0)        | 639 (79.3)              | 29916 (82.4)         |
| Several days                  | 55 (17.6)         | 118 (14.6)              | 4583 (12.6)          |
| More than half of the days    | 8 (2.6)           | 17 (2.1)                | 604 (1.7)            |
| Nearly every day              | 5 (1.6)           | 12 (1.5)                | 357 (1.0)            |
| Missing                       | 7 (2.2)           | 20 (2.5)                | 850 (2.3)            |
| <b>Tenseness/restlessness</b> |                   |                         |                      |
| Not at all                    | 221 (70.8)        | 588 (73.0)              | 28266 (77.8)         |
| Several days                  | 71 (22.8)         | 157 (19.5)              | 6113 (16.8)          |
| More than half of the days    | 6 (1.9)           | 23 (2.9)                | 565 (1.6)            |
| Nearly every day              | 6 (1.9)           | 16 (2.0)                | 313 (0.9)            |
| Missing                       | 8 (2.6)           | 22 (2.7)                | 1053 (2.9)           |
| <b>Tiredness/lethargy</b>     |                   |                         |                      |
| Not at all                    | 125 (40.0)        | 366 (45.4)              | 19107 (52.6)         |
| Several days                  | 130 (41.7)        | 321 (39.8)              | 13373 (36.8)         |
| More than half of the days    | 22 (7.1)          | 53 (6.6)                | 1533 (4.2)           |
| Nearly every day              | 26 (8.3)          | 51 (6.3)                | 1358 (3.7)           |
| Missing                       | 9 (2.9)           | 15 (1.9)                | 939 (2.6)            |

GC, glucocorticoids; n, number.

**Supplement 14.** Sensitivity analysis: Likelihood of experiencing mental health complaints in the past two weeks of oral glucocorticoid users (n = 312) and inhalation glucocorticoid users (n = 806) compared to controls (without exclusion of participants based on psychiatric, neurological, or endocrine history or medication use)

|                    | Likelihood ratio test |         |           | Oral GC vs. controls |            | Inhalation GC vs. controls |      |            |               |
|--------------------|-----------------------|---------|-----------|----------------------|------------|----------------------------|------|------------|---------------|
|                    | $\chi^2$              | P value | $P_{FDR}$ | OR                   | 95% CI     | P value                    | OR   | 95% CI     | P value       |
| <b>Depression</b>  | 11.1                  | 0.0039  | 0.0039    | 1.44                 | 1.08; 1.89 | <b>0.010</b>               | 1.23 | 1.03; 1.46 | <b>0.023</b>  |
| <b>Disinterest</b> | 17.8                  | 1.4e-4  | 1.9e-04   | 1.73                 | 1.31; 2.27 | <b>8.5e-05</b>             | 1.21 | 1.00; 1.45 | 0.041         |
| <b>Tenseness</b>   | 24.0                  | 6.1e-06 | 1.2e-05   | 1.68                 | 1.29; 2.16 | <b>7.0e-05</b>             | 1.31 | 1.11; 1.54 | <b>0.0014</b> |
| <b>Tiredness</b>   | 39.2                  | 3.1e-09 | 1.2e-08   | 1.79                 | 1.42; 2.27 | <b>9.0e-07</b>             | 1.33 | 1.15; 1.53 | <b>1.1e-4</b> |

Calculated using logistic regression analysis, adjusting for age, sex, and education. P values in bold are statistically significant after Bonferroni correction for family-wise error rate of two tests ( $P < 0.025$ ).

CI, confidence interval; GC, glucocorticoids; OR, odds ratio;  $P_{FDR}$ , Benjamini-Hochberg false discovery rate corrected P values.



**Supplement 15.** Sensitivity analysis: Imaging parameters, presented as the adjusted mean difference of patients using oral glucocorticoids (n = 222) or inhalation glucocorticoids (n = 557) compared to controls (n = 24106) (after exclusion of outlier values per group per variable)

|                                                         | ANOVA   |         |                  | Oral GC vs. controls |              |                   | Inhalation GC vs. controls |             |             |
|---------------------------------------------------------|---------|---------|------------------|----------------------|--------------|-------------------|----------------------------|-------------|-------------|
|                                                         | F value | P value | P <sub>FDR</sub> | AMD*                 | 95% CI       | P value           | AMD*                       | 95% CI      | P value     |
| <b><i>Volumetric measures</i></b>                       |         |         |                  |                      |              |                   |                            |             |             |
| <i>Global volumes (in mm<sup>3</sup>)</i>               |         |         |                  |                      |              |                   |                            |             |             |
| Total brain volume                                      | 16.0    | 1.1e-7  | <b>4.6e-7</b>    | -3991                | -10852; 2869 | 0.33              | 3756                       | -565; 8076  | 0.10        |
| Grey matter volume                                      | 28.8    | 3.4e-13 | <b>6.1e-12</b>   | -3143                | -7081; 794   | 0.14              | 1120                       | -1337; 3576 | 0.50        |
| White matter volume                                     | 5.4     | 4.6e-3  | <b>7.1e-3</b>    | -1861                | -6349; 2626  | 0.55              | 2374                       | -454; 5203  | 0.11        |
| Peripheral cortex                                       | 27.0    | 2.0e-12 | <b>1.8e-11</b>   | -4412                | -7948; -876  | <b>0.011</b>      | 1148                       | -1058; 3355 | 0.41        |
| CSF volume                                              | 16.8    | 5.0e-8  | <b>2.3e-7</b>    | 1437                 | -210; 3084   | 0.10              | -449                       | -1492; 594  | 0.53        |
| <i>Subcortical volumes (in mm<sup>3</sup>)</i>          |         |         |                  |                      |              |                   |                            |             |             |
| Accumbens                                               | 13.0    | 2.3e-6  | <b>5.8e-6</b>    | -15.6                | -28.8; -2.3  | <b>0.018</b>      | -4.6                       | -13.0; 3.7  | 0.37        |
| Caudate                                                 | 4.7     | 8.8e-3  | <b>1.1e-2</b>    | 69.4                 | 18.4; 120.3  | <b>0.0049</b>     | 4.5                        | -27.4; 36.3 | 0.92        |
| Hippocampus                                             | 5.4     | 4.7e-3  | <b>7.1e-3</b>    | -17.1                | -71.2; 37.0  | 0.70              | -17                        | -51.3; 17.3 | 0.44        |
| Pallidum                                                | 4.9     | 7.4e-3  | <b>9.8e-3</b>    | 5.7                  | -20.5; 31.8  | 0.83              | -9.8                       | -26.3; 6.7  | 0.32        |
| Putamen                                                 | 13.7    | 1.1e-6  | <b>3.4e-6</b>    | -63                  | -127.1; 1.0  | 0.055             | -19.9                      | -59.7; 20.0 | 0.44        |
| Thalamus                                                | 10.0    | 4.6e-5  | <b>8.7e-5</b>    | -25.6                | -98.2; 46.9  | 0.64              | -0.6                       | -46.2; 45.1 | 1.00        |
| <i>Regional grey matter volumes (in mm<sup>3</sup>)</i> |         |         |                  |                      |              |                   |                            |             |             |
| Amygdala                                                | 28.3    | 5.1e-13 | <b>6.1e-12</b>   | -17.2                | -43.8; 9.4   | 0.26              | -22.6                      | -39.3; -5.9 | <b>0.01</b> |
| Caudate                                                 | 12.6    | 3.5e-6  | <b>8.4e-6</b>    | 138.1                | 67.7; 208.6  | <b>&lt;0.0001</b> | 15.1                       | -28.8; 59.1 | 0.66        |
| Cerebellum                                              | 10.3    | 3.3e-5  | <b>6.6e-5</b>    | -1.1                 | -42.8; 40.6  | 1.00              | -6.6                       | -32.5; 19.3 | 0.78        |

|                              |      |         |                |          |                  |                   |         |                  |               |
|------------------------------|------|---------|----------------|----------|------------------|-------------------|---------|------------------|---------------|
| Cingulate gyrus, anterior    | 3.9  | 2.1e-2  | <b>2.6e-2</b>  | 110.5    | -7.8; 229.0      | 0.071             | 27.1    | -47.9; 102.0     | 0.63          |
| Hippocampus                  | 3.3  | 3.9e-2  | <b>4.6e-2</b>  | 24.3     | -22.4; 70.9      | 0.41              | 2.4     | -27.0; 31.8      | 0.97          |
| Insular cortex               | 13.1 | 2.0e-6  | <b>5.5e-6</b>  | -74.8    | -143.2; -6.4     | <b>0.029</b>      | 8.7     | -34.1; 51.4      | 0.85          |
| Precuneal cortex             | 5.2  | 5.4e-3  | <b>7.5e-3</b>  | -60.1    | -213.6; 93.3     | 0.59              | 0.0     | -95.6; 95.6      | 1.00          |
| <b>DTI measures</b>          |      |         |                |          |                  |                   |         |                  |               |
| <i>Fractional anisotropy</i> |      |         |                |          |                  |                   |         |                  |               |
| Global                       | 22.7 | 1.4e-10 | <b>1.0e-9</b>  | -0.0043  | -0.0067; -0.0018 | <b>2.0e-4</b>     | -0.0019 | -0.0035; -3.4e-4 | <b>0.013</b>  |
| Body of corpus callosum      | 11.4 | 1.1e-5  | <b>2.5e-5</b>  | -0.0048  | -0.0086; -0.0010 | <b>0.0097</b>     | -0.0021 | -0.0045; 3.4e-4  | 0.11          |
| Genu of corpus callosum      | 15.3 | 2.3e-7  | <b>8.4e-7</b>  | -0.0059  | -0.010; -0.0016  | <b>0.0048</b>     | -0.0017 | -0.0044; 0.0010  | 0.28          |
| Cingulum cingulate           | 6.5  | 1.5e-3  | <b>2.5e-3</b>  | -0.0022  | -0.0065; 0.0021  | 0.42              | -0.0026 | -0.0053; 9.7e-5  | 0.061         |
| Cingulum hippocampus         | 7.5  | 5.7e-4  | <b>9.7e-4</b>  | -0.00012 | -0.0046; 0.0044  | 1.00              | -0.0036 | -0.0064; -7.5e-4 | <b>0.010</b>  |
| <i>Mean diffusivity</i>      |      |         |                |          |                  |                   |         |                  |               |
| Global                       | 29.1 | 2.4e-13 | <b>6.1e-12</b> | 7.1e-6   | 3.7e-6; 1.1e-5   | <b>&lt;0.0001</b> | 2.5e-6  | 3.1e-7; 4.7e-6   | <b>0.022</b>  |
| Body of corpus callosum      | 17.1 | 3.6e-8  | <b>1.9e-7</b>  | 7.5e-6   | 2.8e-6; 1.2e-5   | <b>7.0e-4</b>     | 3.7e-6  | 6.9e-7; 6.6e-6   | <b>0.012</b>  |
| Genu of corpus callosum      | 21.6 | 4.3e-10 | <b>2.6e-9</b>  | 9.5e-6   | 3.9e-6; 1.5e-5   | <b>3.0e-4</b>     | 3.6e-6  | 2.9e-8; 7.1e-6   | <b>0.048</b>  |
| Splenium of corpus callosum  | 9.9  | 5.2e-5  | <b>9.4e-5</b>  | 4.6e-6   | 7.3e-7; 8.4e-6   | <b>0.016</b>      | 4.2e-6  | 1.8e-6; 6.7e-6   | <b>2.0e-4</b> |
| Cingulum cingulate           | 5.3  | 5.2e-3  | <b>7.5e-3</b>  | 2.6e-6   | -9.4e-7; 6.1e-6  | 0.19              | 2.6e-6  | 3.6e-7; 4.8e-6   | <b>0.019</b>  |
| Cingulum hippocampus         | 13.7 | 1.1e-6  | <b>3.4e-6</b>  | 4.4e-6   | 2.5e-7; 8.6e-6   | <b>0.035</b>      | 4.3e-6  | 1.6e-6; 6.9e-6   | <b>6.0e-4</b> |
| Uncinate fasciculus          | 11.3 | 1.2e-5  | <b>2.5e-5</b>  | 5.8e-6   | 1.9e-6; 9.7e-6   | <b>0.0018</b>     | 2.4e-6  | -8.8e-8; 4.8e-6  | 0.061         |

\* Adjusted mean difference, calculated using linear models, adjusted for age, sex, education, X-, Y-, and Z-position of the head in the scanner, head size, assessment centre, and year of imaging acquisition.

P<sub>FDR</sub>, Benjamini-Hochberg false discovery rate corrected P values; SE, standard error. P values in bold are statistically significant (P < 0.05).

**Supplement 16.** Cognitive outcome measures of oral glucocorticoid users (n = 222) and inhalation glucocorticoid users (n = 557) vs. controls (after exclusion of outlier values per group per variable)

|                            | ANOVA   |         |                  | Oral GC vs. controls |              |              | Inhalation GC vs. controls |             |         | Participants with available data, n (%) |               |            |
|----------------------------|---------|---------|------------------|----------------------|--------------|--------------|----------------------------|-------------|---------|-----------------------------------------|---------------|------------|
|                            | F value | P value | P <sub>FDR</sub> | AMD*                 | 95% CI       | P value      | AMD*                       | 95% CI      | P value | Oral GC                                 | Inhalation GC | Controls   |
| <b>Trail making A</b>      | 5.2     | 0.0057  | <b>0.011</b>     | -0.10                | -0.25; 0.05  | 0.25         | -0.018                     | -0.12; 0.09 | 0.88    | 143 (64)                                | 286 (51)      | 15996 (66) |
| <b>Trail making B</b>      | 9.6     | 6.8e-5  | <b>2.0e-4</b>    | -0.16                | -0.32; -0.01 | <b>0.038</b> | -0.064                     | -0.17; 0.04 | 0.31    | 137 (62)                                | 289 (52)      | 15733 (65) |
| <b>Symbol substitution</b> | 11.6    | 8.9e-6  | <b>5.3e-5</b>    | -0.18                | -0.34; -0.02 | <b>0.021</b> | -0.046                     | -0.16; 0.06 | 0.55    | 141 (64)                                | 295 (53)      | 16270 (67) |

\* Adjusted mean difference between patients and controls, expressed in Z scores. Calculated using linear models, adjusted for age, sex, and education. Trail making A, and trail making B were log transformed before generation of Z scores because they were non-normally distributed. Variables were transformed such that higher values indicate a better performance.

GC, glucocorticoids; P<sub>FDR</sub>, Benjamini-Hochberg false discovery rate corrected P values.

**Supplement 17.** STROBE Statement – Checklist of items that should be included in reports of cohort studies

|                              | Item No | Recommendation                                                                                                                                                                       | Where to be found                                                                          |
|------------------------------|---------|--------------------------------------------------------------------------------------------------------------------------------------------------------------------------------------|--------------------------------------------------------------------------------------------|
| <b>Title and abstract</b>    | 1       | (a) Indicate the study's design with a commonly used term in the title or the abstract                                                                                               | Abstract: Design (p.2)                                                                     |
|                              |         | (b) Provide in the abstract an informative and balanced summary of what was done and what was found                                                                                  | Abstract: Main outcome measures, Results (p.2)                                             |
| <b>Introduction</b>          |         |                                                                                                                                                                                      |                                                                                            |
| Background/<br>rationale     | 2       | Explain the scientific background and rationale for the investigation being reported                                                                                                 | Introduction (p.4)                                                                         |
| Objectives                   | 3       | State specific objectives, including any prespecified hypotheses                                                                                                                     | Introduction (p.4)                                                                         |
| <b>Methods</b>               |         |                                                                                                                                                                                      |                                                                                            |
| Study design                 | 4       | Present key elements of study design early in the paper                                                                                                                              | Study design (p.5)                                                                         |
| Setting                      | 5       | Describe the setting, locations, and relevant dates, including periods of recruitment, exposure, follow-up, and data collection                                                      | Study design, Data collection (p.5)                                                        |
| Participants                 | 6       | (a) Give the eligibility criteria, and the sources and methods of selection of participants. Describe methods of follow-up                                                           | Participants (pp.5-6)                                                                      |
|                              |         | (b) For matched studies, give matching criteria and number of exposed and unexposed                                                                                                  | <i>Not applicable</i>                                                                      |
| Variables                    | 7       | Clearly define all outcomes, exposures, predictors, potential confounders, and effect modifiers. Give diagnostic criteria, if applicable                                             | Data collection, Imaging data, Cognitive and Emotional data, Statistical analysis (pp.5-9) |
| Data sources/<br>measurement | 8       | For each variable of interest, give sources of data and details of methods of assessment (measurement). Describe comparability of assessment methods if there is more than one group | Data collection, Imaging data, Cognitive and Emotional data (pp.5-7)                       |
| Bias                         | 9       | Describe any efforts to address potential sources of bias                                                                                                                            | Statistical analysis (pp.7-9)                                                              |
| Study size                   | 10      | Explain how the study size was arrived at                                                                                                                                            | Participants (pp.5-6)                                                                      |
| Quantitative variables       | 11      | Explain how quantitative variables were handled in the analyses. If applicable, describe which groupings were chosen and why                                                         | Statistical analysis (pp.7-9)                                                              |
| Statistical methods          | 12      | (a) Describe all statistical methods, including those used to control for confounding                                                                                                | Statistical analysis (pp.7-9)                                                              |
|                              |         | (b) Describe any methods used to examine subgroups and interactions                                                                                                                  |                                                                                            |
|                              |         | (c) Explain how missing data were addressed                                                                                                                                          |                                                                                            |
|                              |         | (d) If applicable, explain how loss to follow-up was addressed                                                                                                                       |                                                                                            |
|                              |         | (e) Describe any sensitivity analyses                                                                                                                                                |                                                                                            |

**Results**

|                          |     |                                                                                                                                                                                                                                                                                                                                                                                                                             |                                                                                                            |
|--------------------------|-----|-----------------------------------------------------------------------------------------------------------------------------------------------------------------------------------------------------------------------------------------------------------------------------------------------------------------------------------------------------------------------------------------------------------------------------|------------------------------------------------------------------------------------------------------------|
| Participants             | 13  | (a) Report numbers of individuals at each stage of study – e.g. numbers potentially eligible, examined for eligibility, confirmed eligible, included in the study, completing follow-up, and analyzed<br><hr/> (b) Give reasons for non-participation at each stage<br><hr/> (c) Consider use of a flow diagram                                                                                                             | Demographic characteristics (p.10) and Figure 1                                                            |
| Descriptive data         | 14  | (a) Give characteristics of study participants (e.g. demographic, clinical, social) and information on exposures and potential confounders<br><hr/> (b) Indicate number of participants with missing data for each variable of interest<br><hr/> (c) Summarize follow-up time (e.g., average and total amount)                                                                                                              | Demographic characteristics (p.10) and Table 1<br><br><i>Not applicable</i>                                |
| Outcome data             | 15* | Report numbers of outcome events or summary measures over time                                                                                                                                                                                                                                                                                                                                                              | Results (pp.12-18)                                                                                         |
| Main results             | 16  | (a) Give unadjusted estimates and, if applicable, confounder-adjusted estimates and their precision (e.g., 95% confidence interval). Make clear which confounders were adjusted for and why they were included<br><hr/> (b) Report category boundaries when continuous variables were categorized<br><hr/> (c) If relevant, consider translating estimates of relative risk into absolute risk for a meaningful time period | Results (pp.12-18), Tables 2-4, Supplements<br><br>Statistical analysis (p.8)<br><br><i>Not applicable</i> |
| Other analyses           | 17  | Report other analyses done – e.g. analyses of subgroups and interactions, and sensitivity analyses                                                                                                                                                                                                                                                                                                                          | Results (p.19), Supplements                                                                                |
| <b>Discussion</b>        |     |                                                                                                                                                                                                                                                                                                                                                                                                                             |                                                                                                            |
| Key results              | 18  | Summarize key results with reference to study objectives                                                                                                                                                                                                                                                                                                                                                                    | Discussion (pp.20-21)                                                                                      |
| Limitations              | 19  | Discuss limitations of the study, taking into account sources of potential bias or imprecision. Discuss both direction and magnitude of any potential bias                                                                                                                                                                                                                                                                  | Strengths and limitations (pp.22-23)                                                                       |
| Interpretation           | 20  | Give a cautious overall interpretation of results considering objectives, limitations, multiplicity of analyses, results from similar studies, and other relevant evidence                                                                                                                                                                                                                                                  | Findings in context, Potential consequences and implications (pp.20-22)                                    |
| Generalizability         | 21  | Discuss the generalizability (external validity) of the study results                                                                                                                                                                                                                                                                                                                                                       | Strengths and limitations (pp.22-23)                                                                       |
| <b>Other information</b> |     |                                                                                                                                                                                                                                                                                                                                                                                                                             |                                                                                                            |
| Funding                  | 22  | Give the source of funding and the role of the funders for the present study and, if applicable, for the original study on which the present article is based                                                                                                                                                                                                                                                               | Funding (p.24)                                                                                             |

**STROBE Statement – Checklist of items that should be included in reports of cohort studies**

|                              | Item No | Recommendation                                                                                                                                                                       | Where to be found                                                                          |
|------------------------------|---------|--------------------------------------------------------------------------------------------------------------------------------------------------------------------------------------|--------------------------------------------------------------------------------------------|
| <b>Title and abstract</b>    | 1       | (a) Indicate the study's design with a commonly used term in the title or the abstract                                                                                               | Abstract: Design (p.2)                                                                     |
|                              |         | (b) Provide in the abstract an informative and balanced summary of what was done and what was found                                                                                  | Abstract: Main outcome measures, Results (p.2)                                             |
| <b>Introduction</b>          |         |                                                                                                                                                                                      |                                                                                            |
| Background/<br>rationale     | 2       | Explain the scientific background and rationale for the investigation being reported                                                                                                 | Introduction (p.4)                                                                         |
| Objectives                   | 3       | State specific objectives, including any prespecified hypotheses                                                                                                                     | Introduction (p.4)                                                                         |
| <b>Methods</b>               |         |                                                                                                                                                                                      |                                                                                            |
| Study design                 | 4       | Present key elements of study design early in the paper                                                                                                                              | Study design (p.5)                                                                         |
| Setting                      | 5       | Describe the setting, locations, and relevant dates, including periods of recruitment, exposure, follow-up, and data collection                                                      | Study design, Data collection (p.5)                                                        |
| Participants                 | 6       | (a) Give the eligibility criteria, and the sources and methods of selection of participants. Describe methods of follow-up                                                           | Participants (pp.5-6)                                                                      |
|                              |         | (b) For matched studies, give matching criteria and number of exposed and unexposed                                                                                                  | <i>Not applicable</i>                                                                      |
| Variables                    | 7       | Clearly define all outcomes, exposures, predictors, potential confounders, and effect modifiers. Give diagnostic criteria, if applicable                                             | Data collection, Imaging data, Cognitive and Emotional data, Statistical analysis (pp.5-9) |
| Data sources/<br>measurement | 8       | For each variable of interest, give sources of data and details of methods of assessment (measurement). Describe comparability of assessment methods if there is more than one group | Data collection, Imaging data, Cognitive and Emotional data (pp.5-7)                       |
| Bias                         | 9       | Describe any efforts to address potential sources of bias                                                                                                                            | Statistical analysis (pp.7-9)                                                              |
| Study size                   | 10      | Explain how the study size was arrived at                                                                                                                                            | Participants (pp.5-6)                                                                      |
| Quantitative variables       | 11      | Explain how quantitative variables were handled in the analyses. If applicable, describe which groupings were chosen and why                                                         | Statistical analysis (pp.7-9)                                                              |
| Statistical methods          | 12      | (a) Describe all statistical methods, including those used to control for confounding                                                                                                | Statistical analysis (pp.7-9)                                                              |
|                              |         | (b) Describe any methods used to examine subgroups and interactions                                                                                                                  |                                                                                            |
|                              |         | (c) Explain how missing data were addressed                                                                                                                                          |                                                                                            |
|                              |         | (d) If applicable, explain how loss to follow-up was addressed                                                                                                                       |                                                                                            |
|                              |         | (e) Describe any sensitivity analyses                                                                                                                                                |                                                                                            |

1  
2  
3  
4  
5  
6  
7  
8  
9  
10  
11  
12  
13  
14  
15  
16  
17  
18  
19  
20  
21  
22  
23  
24  
25  
26  
27  
28  
29  
30  
31  
32  
33  
34  
35  
36  
37  
38  
39  
40  
41  
42  
43  
44  
45  
46  
47  
48  
49  
50  
51  
52  
53  
54  
55  
56  
57  
58  
59  
60

| <b>Results</b>           |     |                                                                                                                                                                                                                                                                                                                                                                                                                 |                                                                                                    |
|--------------------------|-----|-----------------------------------------------------------------------------------------------------------------------------------------------------------------------------------------------------------------------------------------------------------------------------------------------------------------------------------------------------------------------------------------------------------------|----------------------------------------------------------------------------------------------------|
| Participants             | 13  | (a) Report numbers of individuals at each stage of study – e.g. numbers potentially eligible, examined for eligibility, confirmed eligible, included in the study, completing follow-up, and analyzed<br>(b) Give reasons for non-participation at each stage<br>(c) Consider use of a flow diagram                                                                                                             | Demographic characteristics (p.10) and Figure 1                                                    |
| Descriptive data         | 14  | (a) Give characteristics of study participants (e.g. demographic, clinical, social) and information on exposures and potential confounders<br>(b) Indicate number of participants with missing data for each variable of interest<br>(c) Summarize follow-up time (e.g., average and total amount)                                                                                                              | Demographic characteristics (p.10) and Table 1<br><i>Not applicable</i>                            |
| Outcome data             | 15* | Report numbers of outcome events or summary measures over time                                                                                                                                                                                                                                                                                                                                                  | Results (pp.12-18)                                                                                 |
| Main results             | 16  | (a) Give unadjusted estimates and, if applicable, confounder-adjusted estimates and their precision (e.g., 95% confidence interval). Make clear which confounders were adjusted for and why they were included<br>(b) Report category boundaries when continuous variables were categorized<br>(c) If relevant, consider translating estimates of relative risk into absolute risk for a meaningful time period | Results (pp.12-18), Tables 2-4, Supplements<br>Statistical analysis (p.8)<br><i>Not applicable</i> |
| Other analyses           | 17  | Report other analyses done – e.g. analyses of subgroups and interactions, and sensitivity analyses                                                                                                                                                                                                                                                                                                              | Results (p.19), Supplements                                                                        |
| <b>Discussion</b>        |     |                                                                                                                                                                                                                                                                                                                                                                                                                 |                                                                                                    |
| Key results              | 18  | Summarize key results with reference to study objectives                                                                                                                                                                                                                                                                                                                                                        | Discussion (pp.20-21)                                                                              |
| Limitations              | 19  | Discuss limitations of the study, taking into account sources of potential bias or imprecision. Discuss both direction and magnitude of any potential bias                                                                                                                                                                                                                                                      | Strengths and limitations (pp.22-23)                                                               |
| Interpretation           | 20  | Give a cautious overall interpretation of results considering objectives, limitations, multiplicity of analyses, results from similar studies, and other relevant evidence                                                                                                                                                                                                                                      | Findings in context, Potential consequences and implications (pp.20-22)                            |
| Generalizability         | 21  | Discuss the generalizability (external validity) of the study results                                                                                                                                                                                                                                                                                                                                           | Strengths and limitations (pp.22-23)                                                               |
| <b>Other information</b> |     |                                                                                                                                                                                                                                                                                                                                                                                                                 |                                                                                                    |
| Funding                  | 22  | Give the source of funding and the role of the funders for the present study and, if applicable, for the original study on which the present article is based                                                                                                                                                                                                                                                   | Funding (p.24)                                                                                     |

# BMJ Open

## Association between use of systemic and inhaled glucocorticoids and changes in brain volume and white matter microstructure: a cross-sectional study using data from the UK Biobank

|                                 |                                                                                                                                                                                                                                                                                                                                                                                                                                      |
|---------------------------------|--------------------------------------------------------------------------------------------------------------------------------------------------------------------------------------------------------------------------------------------------------------------------------------------------------------------------------------------------------------------------------------------------------------------------------------|
| Journal:                        | <i>BMJ Open</i>                                                                                                                                                                                                                                                                                                                                                                                                                      |
| Manuscript ID                   | bmjopen-2022-062446.R1                                                                                                                                                                                                                                                                                                                                                                                                               |
| Article Type:                   | Original research                                                                                                                                                                                                                                                                                                                                                                                                                    |
| Date Submitted by the Author:   | 17-Jun-2022                                                                                                                                                                                                                                                                                                                                                                                                                          |
| Complete List of Authors:       | van der Meulen, Merel; Leiden University Medical Center, Department of Medicine, division of Endocrinology<br>Amaya, Jorge Miguel; Leiden University Medical Center, Department of Medicine, division of Endocrinology<br>Dekkers, Olaf; Leiden University Medical Center, Department of Medicine, division of Endocrinology<br>Meijer, Onno C.; Leiden University Medical Center, Department of Medicine, division of Endocrinology |
| <b>Primary Subject Heading</b>: | Diabetes and endocrinology                                                                                                                                                                                                                                                                                                                                                                                                           |
| Secondary Subject Heading:      | Mental health, Pharmacology and therapeutics, Radiology and imaging                                                                                                                                                                                                                                                                                                                                                                  |
| Keywords:                       | Magnetic resonance imaging < RADIOLOGY & IMAGING, Anxiety disorders < PSYCHIATRY, DIABETES & ENDOCRINOLOGY, INTERNAL MEDICINE, MENTAL HEALTH, Depression & mood disorders < PSYCHIATRY                                                                                                                                                                                                                                               |
|                                 |                                                                                                                                                                                                                                                                                                                                                                                                                                      |

SCHOLARONE™  
Manuscripts





I, the Submitting Author has the right to grant and does grant on behalf of all authors of the Work (as defined in the below author licence), an exclusive licence and/or a non-exclusive licence for contributions from authors who are: i) UK Crown employees; ii) where BMJ has agreed a CC-BY licence shall apply, and/or iii) in accordance with the terms applicable for US Federal Government officers or employees acting as part of their official duties; on a worldwide, perpetual, irrevocable, royalty-free basis to BMJ Publishing Group Ltd ("BMJ") its licensees and where the relevant Journal is co-owned by BMJ to the co-owners of the Journal, to publish the Work in this journal and any other BMJ products and to exploit all rights, as set out in our [licence](#).

The Submitting Author accepts and understands that any supply made under these terms is made by BMJ to the Submitting Author unless you are acting as an employee on behalf of your employer or a postgraduate student of an affiliated institution which is paying any applicable article publishing charge ("APC") for Open Access articles. Where the Submitting Author wishes to make the Work available on an Open Access basis (and intends to pay the relevant APC), the terms of reuse of such Open Access shall be governed by a Creative Commons licence – details of these licences and which [Creative Commons](#) licence will apply to this Work are set out in our licence referred to above.

Other than as permitted in any relevant BMJ Author's Self Archiving Policies, I confirm this Work has not been accepted for publication elsewhere, is not being considered for publication elsewhere and does not duplicate material already published. I confirm all authors consent to publication of this Work and authorise the granting of this licence.

1  
2  
3 1 **Association between use of systemic and inhaled glucocorticoids and changes in brain volume and**  
4 **white matter microstructure: a cross-sectional study using data from the UK Biobank**

5  
6 3

7 4 Merel van der Meulen (0000-0002-0001-4408)<sup>1</sup>, Jorge Miguel Amaya<sup>1</sup>, Olaf M. Dekkers<sup>1</sup>, Onno C.  
8 5 Meijer (0000-0002-8394-6859)<sup>1</sup>

9  
10 6

11 7 <sup>1</sup> Department of Medicine, division of Endocrinology, Leiden University Medical Center, Leiden, the  
12 8 Netherlands

13  
14 9

15 10 Merel van der Meulen: PhD candidate

16 11 Jorge Miguel Amaya: PhD candidate

17 12 Olaf M. Dekkers: full professor

18 13 Onno C. Meijer: full professor

19  
20 14

21 15 **Correspondence to:** Merel van der Meulen, [m.vandermeulen@lumc.nl](mailto:m.vandermeulen@lumc.nl), Department of Medicine,  
22 16 division of Endocrinology, Leiden University Medical Center, Leiden, the Netherlands

23  
24 17

25 18 **Tables:** 4

26 19 **Figures:** 3

27 20 **Word count:** 5801

28  
29 21

30  
31 22

32  
33  
34  
35  
36  
37  
38  
39  
40  
41  
42  
43  
44  
45  
46  
47  
48  
49  
50  
51  
52  
53  
54  
55  
56  
57  
58  
59  
60

1  
2  
3 **Abstract**

4 **Objective:** To test the hypothesis that systemic and inhaled glucocorticoid use is associated with  
5  
6 changes in grey matter volume (GMV) and white matter microstructure.  
7

8 **Design:** Cross-sectional study.  
9

10 **Setting:** UK Biobank, a prospective population-based cohort study of adults recruited in the UK  
11  
12 between 2006 and 2010.

13 **Participants:** After exclusion based on neurological, psychiatric, or endocrinological history, and use  
14  
15 of psychotropic medication, 222 systemic glucocorticoid users, 557 inhaled glucocorticoid users, and  
16  
17 24,106 controls with available T1 and diffusion MRI data were included.

18 **Main outcome measures:** Primary outcomes were differences in 22 volumetric and 14 diffusion  
19  
20 imaging parameters between glucocorticoid users and controls, determined using linear regression  
21  
22 analyses adjusted for potential confounders. Secondary outcomes included cognitive functioning (six  
23  
24 tests) and emotional symptoms (four questions).

25 **Results:** Both systemic and inhaled glucocorticoid use were associated with reduced white matter  
26  
27 integrity (lower fractional anisotropy (FA) and higher mean diffusivity (MD)) compared with controls,  
28  
29 with larger effect sizes in systemic users (FA: adjusted mean difference (AMD)=-3.7e-3, -95%  
30  
31 confidence interval (CI)=-6.4e-3 to 1.0e-3; MD: AMD=7.2e-6, 95%CI=3.2e-6 to 1.1e-5) than inhaled  
32  
33 users (FA: AMD=-2.3e-3, 95%CI=-4.0e-3 to -5.7e-4; MD: AMD=2.7e-6, 95%CI=1.7e-7 to 5.2e-6).  
34  
35 Systemic use was also associated with larger caudate GMV (AMD=178.7 mm<sup>3</sup>, 95%CI=82.2 to 275.0),  
36  
37 while inhaled users had smaller amygdala GMV (AMD=-23.9 mm<sup>3</sup>, 95%CI=-41.5 to -6.2) than controls.  
38  
39 As for secondary outcomes, systemic users performed worse on the symbol digit substitution task  
40  
41 (AMD=-0.17 SD, 95%CI=-0.34 to -0.01), and reported more depressive symptoms (OR=1.76,  
42  
43 95%CI=1.25-2.43), disinterest (OR=1.84, 95%CI=1.29-2.56), tenseness/restlessness (OR=1.78,  
44  
45 95%CI=1.29-2.41), and tiredness/lethargy (OR=1.90, 95%CI=1.45-2.50) compared with controls.  
46  
47 Inhaled users only reported more tiredness/lethargy (OR=1.35, 95%CI=1.14-1.60).

48 **Conclusions:** Both systemic and inhaled glucocorticoid use are associated with decreased white  
49  
50 matter integrity and limited changes in GMV. This association may contribute to the neuropsychiatric  
51  
52 side effects of glucocorticoid medication, especially with chronic use.  
53  
54  
55  
56  
57  
58  
59  
60

1  
2  
3 52 **Strengths and limitations of this study**  
4

- 5 53 • To the best of our knowledge, this is the largest study to date assessing the association  
6 54 between glucocorticoid use and brain structure, and the first to investigate these  
7 55 associations in inhaled glucocorticoid users.  
8  
9 56 • Relatively strict exclusion criteria were used to limit the potential confounding that may arise  
10 57 in observational cohort studies.  
11  
12 58 • However, the cross-sectional nature of this study precludes formal conclusions on causality.  
13  
14 59 • Dose and duration of medication use were not available in the UK Biobank, making thorough  
15 60 analyses on dose-dependent or duration-dependent associations impossible.  
16  
17  
18  
19  
20  
21  
22  
23  
24  
25  
26  
27  
28  
29  
30  
31  
32  
33  
34  
35  
36  
37  
38  
39  
40  
41  
42  
43  
44  
45  
46  
47  
48  
49  
50  
51  
52  
53  
54  
55  
56  
57  
58  
59  
60

## 61 Introduction

62 Due to their immunosuppressive properties, glucocorticoids are among the most prescribed drugs on  
63 the market, with an estimated annual prevalence of systemic glucocorticoid use between 0.5% and  
64 3%<sup>1-5</sup>. Although efficacious, both systemic and local (especially inhaled) glucocorticoids are  
65 associated with many potentially serious metabolic, cardiovascular, and musculoskeletal side effects  
66<sup>6-9</sup>. Besides these physical side effects, the use of synthetic glucocorticoids is also associated with  
67 neuropsychiatric symptoms and disorders, including depression, mania, delirium, and even a seven-  
68 fold increased suicide (attempt) rate<sup>10, 11</sup>. In addition, on an anatomical level, both preclinical and  
69 clinical studies have shown long-lasting effects of glucocorticoid overexposure on the brain. In  
70 patients with chronic endogenous glucocorticoid excess due to a pituitary tumour (Cushing disease),  
71 it has been established that long-term glucocorticoid excess is associated with global cerebral  
72 atrophy<sup>12-18</sup> and decreased cortical thickness and grey matter volumes in specific brain regions<sup>13, 18-</sup>  
73<sup>26</sup>. Some of these effects were detected even after ten years of biochemical remission<sup>22, 23</sup>.  
74 Moreover, a few small studies have shown volumetric reductions in specific brain regions, including  
75 the hippocampus and amygdala,<sup>27-31</sup> in patients using chronic and/or high-dose synthetic systemic  
76 glucocorticoids. Besides these structural abnormalities, several studies in animal models and patients  
77 with Cushing disease have also demonstrated widespread reductions in white matter integrity  
78 throughout the brain<sup>32-36</sup>. In humans, this was studied using diffusion tensor imaging (DTI), showing  
79 globally decreased fractional anisotropy (FA), which represents the directionality of water diffusion  
80 through the brain and is a marker of microstructural architecture<sup>37</sup>, and increased mean diffusivity  
81 (MD)<sup>32-35</sup>, which represents an increase in water diffusion in all directions and is associated with  
82 disease processes such as inflammation and oedema<sup>37</sup>.

83 However, most clinical studies investigating the effects of glucocorticoid overexposure on  
84 brain structure have been performed in small, selected populations with chronic glucocorticoid  
85 excess due to Cushing disease or systemic glucocorticoid use. It remains unknown whether these  
86 associations can also be observed in a broader sample of people using glucocorticoids, including  
87 inhaled glucocorticoids. We therefore used data from the UK Biobank, a large population-based  
88 cohort study, to investigate whether, at a population level, differences in brain volumes and white  
89 matter microstructure could be detected between systemic or inhaled glucocorticoid users and non-  
90 users. As secondary outcomes, we also assessed potential differences in cognitive and emotional  
91 functioning. Based on previous literature, we hypothesized that glucocorticoid use would be  
92 associated with decreased grey matter volumes in the limbic system and hippocampus, a widespread  
93 reduction in FA and increase in MD throughout the brain, and poorer cognitive and emotional  
94 outcomes.

## 96 **Methods**

### 97 *Study design*

98 The UK Biobank is a large population-based prospective cohort, comprising over 500,000 participants  
99 aged 40-69 years at the time of recruitment (between 2006 and 2010)<sup>38</sup>. The protocol for the UK  
100 Biobank was approved by the North-West Multi-Centre Research Ethics Committee and all  
101 participants provided written informed consent for collection, storage, and use of their data. Data for  
102 the present study were obtained under application number 59004.

103

### 104 *Data collection*

105 Data were collected at the assessment centres and during an online follow-up. Data used for this  
106 study included data on demographic characteristics, health and medical history, brain imaging,  
107 cognitive and emotional functioning, and body composition. Data on demographic characteristics,  
108 cognition, and emotional functioning were collected using a touch screen device at the assessment  
109 centres. If patients had indicated that they did not want to answer a question on one or more of  
110 these characteristics, we coded this as missing. Data on health and medical history, including  
111 medication use, were collected using the touch screen device and a verbal interview (self-reported  
112 data), but also using hospital episode statistics (HES). Body composition was measured using body  
113 impedance on a Tanita BC418MA body composition analyser as described in the UK Biobank  
114 documentation<sup>39</sup>. The imaging acquisition is described in more detail below.

115

### 116 *Participants*

117 For the analysis presented in this study, we selected participants who

- 118 1. Had both T1-weighted magnetic resonance imaging (MRI) and diffusion tensor imaging (DTI)  
119 data available at the same imaging visit;
- 120 2. Did not have a history of psychiatric disease based on self-reported data or HES data.  
121 However, we did include the psychiatric diseases most commonly associated with  
122 glucocorticoid use based on previous literature (anxiety, depression, mania, and delirium)<sup>10</sup>  
123 as we did not want to exclude patients based on potentially glucocorticoid-related outcomes;
- 124 3. Did not use psychotropic medication;
- 125 4. And did not have any neurological condition based on self-reported or HES data.

126 Individuals who met these criteria and used oral or parenteral glucocorticoids at the time of imaging  
127 were included in the systemic glucocorticoid patient group (n = 222), and individuals who met these  
128 criteria and used inhaled glucocorticoids (but no systemic glucocorticoids) at the time of imaging  
129 were included in the inhaled glucocorticoid group (n = 557). Among the patients using systemic  
130 glucocorticoids, 14 were also using inhaled glucocorticoids. Individuals who met these criteria but

1  
2  
3 131 had not used systemic or inhaled glucocorticoids at any timepoint (before and including the imaging  
4 132 visit) and did not have any endocrinological disorder according to self-reported or HES data, were  
5 133 included in the control group (n = 24,106). A flowchart of patient selection is presented in Figure 1,  
6 134 and Supplement 1 provides a list of all Biobank UK field codes that were used as inclusion or  
7 135 exclusion criteria.  
8  
9  
10  
11  
12

136

### 137 *Imaging data*

138 Our study made use of imaging-derived phenotypes (IDPs) generated by an image-processing  
139 pipeline developed and run on behalf of the UK Biobank. Details on the brain imaging acquisition  
140 protocols, imaging processing and quality control, and generation of IDPs are provided by the UK  
141 Biobank<sup>40,41</sup>. In short, all imaging was performed on a standard Siemens Skyra 3 Tesla scanner with a  
142 standard Siemens 32-channel radiofrequency receiver head coil. T1-weighted imaging was  
143 performed using a three-dimensional magnetization-prepared rapid acquisition with gradient echo  
144 sequence (3D MPRAGE) in the sagittal plane (voxel 1x1x1 mm; field-of-view 208x256x256 matrix). T1-  
145 weighted data were segmented using FAST (FMRIB's Automated Segmentation Tool<sup>42</sup>), to obtain  
146 volumes of cerebrospinal fluid (CSF), grey matter, and white matter, and to generate grey matter  
147 IDPs in 139 regions of interest (ROI). Subcortical structures were modelled using FIRST (FMRIB's  
148 Integrated Registration and Segmentation Tool<sup>43</sup>). For the present study, the mean volume of each  
149 bilateral structure was calculated over the two hemispheres, and the total cerebellar volume was  
150 calculated by adding up the volumes of all cerebellar lobules.

151 Diffusion imaging was performed using a standard Stejskal-Tanner pulse sequence to acquire  
152 50 distinct diffusion-encoding directions for two diffusion-weighted shells with b values of 1000 and  
153 2000 s/mm<sup>2</sup> (voxel 2x2x2 mm; field-of-view 104x104x72 matrix). The b = 1000 s/mm<sup>2</sup> data were fed  
154 into the diffusion-tensor-imaging (DTI) fitting tool (DTIFIT), which created DTI outputs including  
155 fractional anisotropy (FA) and mean diffusivity (MD). These outputs were then aligned to a standard-  
156 space white-matter skeleton using TBSS (Tract-Based Spatial Statistics<sup>44</sup>), and were averaged across  
157 a set of 48 standard-space tract masks defined by the John Hopkins University White Matter Atlas<sup>45</sup>.  
158 For the present study, the mean FA and MD of each bilateral structure of interest were calculated  
159 over the two hemispheres. Moreover, global FA and MD measures were calculated by averaging  
160 these metrics over all white matter tracts per individual. Grey matter FA or MD were not available in  
161 the UK Biobank and are therefore not included in the global FA and MD.

162

### 163 *Cognitive and emotional data*

164 At the assessment centres, participants also completed a series of cognitive tests and questionnaires  
165 on a touch screen. For these analyses, six cognitive tasks were selected: reaction time (to assess

1  
2  
3 166 simple processing speed; expressed as mean time to correctly identify matches), trail making A and B  
4  
5 167 (to test visual attention; expressed as the duration to complete the numeric (A) or alphanumeric (B)  
6  
7 168 path), fluid intelligence (to test reasoning and problem solving; expressed as a fluid intelligence  
8  
9 169 score, which is the number of correct answers given to 13 questions), symbol digit substitution (to  
10  
11 170 assess complex processing speed; expressed as the number of symbol digit matches made correctly  
12  
13 171 within two minutes, with no maximum), and digit span (to test numeric working memory; expressed  
14  
15 172 as the maximum digits remembered correctly, with a maximum of 12). For fluid intelligence, symbol  
16  
17 173 digit substitution, and digit span tests, higher scores represent a better cognitive performance, while  
18  
19 174 for reaction time, and trail making A and B, higher scores represent a worse cognitive performance.

18 175 Moreover, we analysed four mental health questionnaire items that specifically asked about  
19  
20 176 the participant's situation in the previous two weeks, in which the glucocorticoid users were likely  
21  
22 177 already using glucocorticoid medication. These questions included the frequency of a depressed  
23  
24 178 mood, disinterest, tenseness/restlessness, and tiredness/lethargy in the past two weeks, and were  
25  
26 179 answered using categorical answer options ('Never', 'Several days', 'More than half of the days', or  
27  
28 180 'Nearly every day'). The entire questionnaire can be found via:

28 181 <https://biobank.ndph.ox.ac.uk/ukb/ukb/docs/TouchscreenQuestionsMainFinal.pdf>.

29  
30 182

### 31 183 *Statistical analysis*

32  
33 184 Demographic characteristics were presented as mean and standard deviation (SD) or number and  
34  
35 185 percentage and were compared across the three groups using analysis of variance (ANOVA) or chi  
36  
37 186 squared tests, respectively.

38  
39 187 The primary outcomes of this study were the differences in imaging parameters between  
40  
41 188 glucocorticoid users and controls for a selection of ROIs (22 volumetric parameters, 14 diffusion  
42  
43 189 parameters), that have previously been shown to be affected by long-term glucocorticoid exposure  
44  
45 190 (see Supplement 2). As secondary outcomes, potential differences in cognitive and emotional  
46  
47 191 outcomes between glucocorticoid users and controls were assessed.

47 192 The statistical analysis was performed in a stepwise approach, which is visualized in Figure 2.  
48  
49 193 For the imaging and cognitive outcomes, multivariable linear regression models were used. The  
50  
51 194 assumption of normality of the residuals was assessed using quantile-quantile (Q-Q) plots and  
52  
53 195 homogeneity of variance across the groups was tested using Levene's test and was visually assessed  
54  
55 196 using scatter plots. Subsequently, ANOVA was used to assess whether any differences in outcome  
56  
57 197 parameters existed between systemic glucocorticoid users, inhaled glucocorticoid users, and  
58  
59 198 controls. To account for multiple testing, P values were adjusted using the Benjamini-Hochberg false  
60  
200 199 discovery rate (FDR) method, for the number of comparisons tested (i.e., 36 for imaging variables, 6  
200  
200 200 for cognitive variables). For those parameters with P values < 0.05 after FDR correction, post-hoc



1  
2  
3 201 Dunnett tests were used to make pairwise comparisons between systemic glucocorticoid users vs.  
4 202 controls, and inhaled glucocorticoid users vs. controls.

5  
6 203 For the multivariable linear models of the imaging parameters, covariates included age, sex,  
7 204 education, a measure of head size (the volumetric scaling from T1 image to standard space,  
8 205 corresponding to the inverse of head size), measures of head position (X-, Y-, and Z-position of the  
9 206 head in the scanner, and table position), assessment centre, and year of imaging acquisition. This  
10 207 selection was based on recommendations by the UK Biobank <sup>46</sup>, in addition to variables that  
11 208 potentially meet the criteria of a confounder for this study. Because fewer than 1% of the  
12 209 participants had missing values for the covariates, complete case analysis was performed for the  
13 210 analysis of these primary outcomes, and all subsequent analyses. We considered that the very  
14 211 limited missing covariate data did not justify the intrinsic uncertainty that would come with  
15 212 imputation.

16 213 For the cognitive outcomes, variables with non-normally distributed residuals (reaction time,  
17 214 trail making A, trail making B) were normalized using log transformation. All cognitive outcomes were  
18 215 transformed such that higher values indicate better performance, and then converted into Z scores.  
19 216 The linear models of the cognitive outcomes were adjusted for age, sex, and education.

20 217 Since the emotional outcome parameters were categorical, logistic models were used,  
21 218 adjusted for age, sex, and education. Per symptom, the participants who reported a frequency of  
22 219 'Several days', 'More than half of the days', or 'Nearly every day' were grouped together and were  
23 220 compared with participants who replied 'Never'. The likelihood ratio test was performed to  
24 221 determine whether the proportion of patients experiencing a mental health complaint in the past  
25 222 two weeks differed between the three groups. For those parameters with a statistically significant  
26 223 difference after FDR correction (for 4 comparisons), the odds ratio (OR) of experiencing a mental  
27 224 health complaint in the past two weeks was calculated for each glucocorticoid user group compared  
28 225 with controls. P values pertaining to the ORs were Bonferroni-corrected for multiple testing.

29 226 Use of glucocorticoids is associated with weight gain and in particular with an increased body  
30 227 fat percentage <sup>7</sup>, which has been reported to affect brain volume and white matter microstructure <sup>47</sup>.  
31 228 Therefore, mediation analysis was performed to test whether the association between glucocorticoid  
32 229 use and brain volume and white matter microstructure were mediated by body fat percentage (as  
33 230 measured by body impedance). For this analysis, all three significantly different volumetric  
34 231 outcomes, and the two (significantly different) global diffusion imaging parameters were considered.  
35 232 The mediation analysis was performed using the *mediation* package, with 1000 simulations and  
36 233 including the same covariates for the imaging parameters as above.

37 234 Since the doses and duration of medication use are unknown in the UK Biobank, we were  
38 235 unable to perform subgroup analyses based on dose or duration of glucocorticoid use. Because

1  
2  
3 236 inhaled glucocorticoids are expected to cause, on average, lower systemic concentrations of  
4  
5 237 glucocorticoids than orally or parenterally administered glucocorticoids <sup>48</sup>, the inhaled glucocorticoid  
6  
7 238 users likely represent a group of patients exposed to lower systemic concentrations than patients  
8  
9 239 using systemic glucocorticoids and might show less pronounced effects of glucocorticoids on brain  
10  
11 240 parameters. This may give an indication of a dose-dependent effect of glucocorticoids on the brain.  
12  
13 241 In addition, to assess whether we could identify potential duration-dependent or cumulative dose-  
14  
15 242 dependent associations of glucocorticoid use with brain parameters, we performed an additional  
16  
17 243 analysis in the subgroups of glucocorticoid users who reported using glucocorticoids at two different  
18  
19 244 visits (before and including the imaging visit) and therefore likely represent a group of chronic or  
20  
21 245 repeated glucocorticoid users. Since the low number of participants in this group expectedly resulted  
22  
23 246 in a lower power, we performed the post-hoc tests for these subgroups not only on those  
24  
25 247 parameters that were statistically significant in the ANOVA, but on those parameters assessed by  
26  
27 248 post-hoc tests in the main analysis, because this allowed us to gain insight into the difference in  
28  
29 249 effect size compared with the main analysis.

30  
31 250 Lastly, to assess whether outlier values, possibly resulting from poor data quality or  
32  
33 251 processing problems, affected the imaging or cognitive outcomes, the analyses were repeated while  
34  
35 252 excluding outlier values of all outcome parameters (per outcome per study group), defined as more  
36  
37 253 than 1.5 interquartile range (IQR) below the first quartile or above the third quartile. For the  
38  
39 254 cognitive parameters, the outliers were removed after transformation of the data. In addition, a  
40  
41 255 sensitivity analysis of all outcome parameters was performed among all participants with imaging  
42  
43 256 data available, without exclusion based on psychiatric, neurological, or endocrinological history, or  
44  
45 257 medication use.

46  
47 258 All statistical analyses and data visualization were performed in R (version 4.1.1) <sup>49</sup> using the  
48  
49 259 packages tidyverse (version 1.3.1) <sup>50</sup>, car (version 3.0-11) <sup>51</sup>, emmeans (version 1.7.0; [https://cran.r-](https://cran.r-project.org/package=emmeans)  
50  
51 260 [project.org/package=emmeans](https://cran.r-project.org/package=emmeans)), lmttest (0.9-38) <sup>52</sup>, mediation (version 4.5.0) <sup>53</sup>, fauxnaif (version  
52  
53 261 0.6.1; <https://cran.r-project.org/package=fauxnaif>), ggpubr (version 0.4.0;  
54  
55 262 <https://rpkgs.datanovia.com/ggpubr/>), and cowplot (version 1.1.1; [https://cran.r-](https://cran.r-project.org/package=cowplot)  
56  
57 263 [project.org/package=cowplot](https://cran.r-project.org/package=cowplot)).

58  
59 264

### 60 265 *Patient and public involvement*

61 266 Patients and the public were not directly involved in the design or implementation of this study,  
62  
63 267 since we used previously collected data.

1  
2  
3 268 **Results**

4  
5 269 *Demographic characteristics*

6 270 In total, 222 patients using systemic glucocorticoids, 557 patients using inhaled glucocorticoids, and  
7  
8 271 24,106 controls were included. As shown in Table 1, these groups did not differ significantly with  
9  
10 272 respect to sex, education, and smoking status, while the systemic glucocorticoid group was slightly  
11  
12 273 older than the other groups (mean age  $66.1 \pm 7.2$  years for systemic glucocorticoid users;  $63.3 \pm 7.5$   
13  
14 274 years for inhaled glucocorticoid users;  $63.5 \pm 7.5$  years for controls), and the inhaled glucocorticoid  
15 275 group had a higher BMI and body fat percentage (Supplement 3.1).

16 276

17  
18 277  
19  
20  
21  
22  
23  
24  
25  
26  
27  
28  
29  
30  
31  
32  
33  
34  
35  
36  
37  
38  
39  
40  
41  
42  
43  
44  
45  
46  
47  
48  
49  
50  
51  
52  
53  
54  
55  
56  
57  
58  
59  
60

For peer review only

278 **Table 1. Characteristics of included patients using systemic glucocorticoids (n = 222), inhaled glucocorticoids (n = 557), and controls**

|                                                     | Patients using systemic GC (n = 222) | Patients using inhaled GC (n = 557) | Controls (n = 24106) | P value (ANOVA) | Systemic GC vs. controls** |         | Inhaled GC vs. controls** |         |
|-----------------------------------------------------|--------------------------------------|-------------------------------------|----------------------|-----------------|----------------------------|---------|---------------------------|---------|
|                                                     |                                      |                                     |                      |                 | Mean difference (95% CI)   | P value | Mean difference (95% CI)  | P value |
| <b>Sex: male, n (%)*</b>                            | 111 (50.0%)                          | 253 (45.4%)                         | 12154 (50.4%)        | 0.066           |                            |         |                           |         |
| <b>Age at time of scanning in years, mean (SD)*</b> | 66.1 (7.2)                           | 63.3 (7.5)                          | 63.5 (7.5)           | 2.4e-6          | 2.6 (1.4, 3.7)             | <.0001  | -0.2 (-0.9, 0.5)          | 0.81    |
| <b>Education level, n (%)</b>                       |                                      |                                     |                      | 0.66            |                            |         |                           |         |
| <b>College/University degree</b>                    | 108 (48.6)                           | 287 (51.5)                          | 12058 (50.0)         |                 |                            |         |                           |         |
| <b>A levels or equivalent</b>                       | 26 (11.7)                            | 66 (11.8)                           | 2930 (12.2)          |                 |                            |         |                           |         |
| <b>O levels/GCSE or equivalent</b>                  | 38 (17.1)                            | 96 (17.2)                           | 4155 (17.2)          |                 |                            |         |                           |         |
| <b>CSEs or equivalent</b>                           | 9 (4.1)                              | 17 (3.1)                            | 879 (3.6)            |                 |                            |         |                           |         |
| <b>NVQ, HND, HNC, or equivalent</b>                 | 6 (2.7)                              | 35 (6.3)                            | 1396 (5.8)           |                 |                            |         |                           |         |
| <b>Other professional qualifications</b>            | 13 (5.9)                             | 29 (5.2)                            | 1150 (4.8)           |                 |                            |         |                           |         |
| <b>None of the above</b>                            | 4 (1.8)                              | 2 (0.4)                             | 227 (0.9)            |                 |                            |         |                           |         |
| <b>Missing</b>                                      |                                      |                                     |                      |                 |                            |         |                           |         |
| <b>BMI in kg/m<sup>2</sup>, mean (SD)</b>           | 26.2 (3.9)                           | 26.7 (4.3)                          | 26.1 (4.1)           | 1.0e-3          | 0.0 (-0.6, 0.7)            | 0.98    | 0.6 (0.2, 1.0)            | 1.3e-3  |
| <b>Number (%) missing</b>                           | 7 (3.2)                              | 20 (3.6)                            | 1325 (5.5)           |                 |                            |         |                           |         |
| <b>Body fat percentage, mean (SD)</b>               | 30.9 (7.9)                           | 32.1 (8.3)                          | 30.2 (7.9)           | 3.5e-8          | 0.7 (-0.5, 1.9)            | 0.36    | 1.9 (1.1, 2.7)            | <1.0e-4 |
| <b>Number (%) missing</b>                           | 7 (3.2)                              | 20 (3.6)                            | 1331 (5.5)           |                 |                            |         |                           |         |
| <b>Smoking status, n (%)</b>                        |                                      |                                     |                      | 0.44            |                            |         |                           |         |
| <b>Current</b>                                      | 6 (2.7)                              | 11 (2.0)                            | 647 (2.7)            |                 |                            |         |                           |         |
| <b>Previous</b>                                     | 76 (34.2)                            | 200 (35.9)                          | 7858 (32.6)          |                 |                            |         |                           |         |
| <b>Never</b>                                        | 137 (61.7)                           | 341 (61.2)                          | 15380 (63.8)         |                 |                            |         |                           |         |
| <b>Missing</b>                                      | 3 (1.4)                              | 5 (0.9)                             | 221 (0.9)            |                 |                            |         |                           |         |

1  
2  
3  
4  
5  
6  
7  
8  
9  
10  
11  
12  
13  
14  
15  
16  
17  
18  
19  
20  
21  
22  
23  
24  
25  
26  
27  
28  
29  
30  
31  
32  
33  
34  
35  
36  
37  
38  
39  
40  
41  
42  
43  
44  
45  
46

279 \* There were no missing values for the variables sex and age. BMI, body mass index; CI, confidence interval; GC, glucocorticoids; n, number; SD, standard  
280 deviation.  
281 \*\* Calculated using post-hoc Dunnett's test, only for those variables with a statistical difference according to the ANOVA.

For peer review only

1  
2  
3 282 *Volumetric imaging parameters*

4  
5 283 Fifteen out of 22 predefined ROIs for the volumetric imaging were significantly different across the  
6  
7 284 groups according to the ANOVA (Supplement 3.2). However, none of the 'global volume' parameters  
8  
9 285 reached statistical significance in the post-hoc tests (Table 2, Figure 3, Supplement 4). With respect  
10  
11 286 to 'subcortical volumes', the caudate was larger in systemic glucocorticoid users compared with  
12  
13 287 controls (adjusted mean difference (AMD) = 77.8 mm<sup>3</sup>, 95% confidence interval (CI) = 24.5 to 131.1).  
14  
15 288 None of the subcortical volumes (containing both grey and white matter) differed significantly  
16  
17 289 between inhaled glucocorticoid users and controls. Of the 'regional grey matter volumes', the  
18  
19 290 caudate was larger in systemic glucocorticoid users compared with controls (AMD = 178.7 mm<sup>3</sup>, 95%  
20  
21 291 CI = 82.2 to 275.0), and inhaled glucocorticoid users had smaller grey matter volumes in the  
22  
23 292 amygdala (AMD = -23.9 mm<sup>3</sup>, 95% CI = -41.5 to -6.2).

24  
25 293 To assess whether chronic or repeated glucocorticoid exposure was associated with greater  
26  
27 294 changes in imaging parameters, subgroup analyses among chronic systemic glucocorticoid users (n =  
28  
29 295 42) and chronic inhaled glucocorticoid users (n = 305) were performed (demographic characteristics  
30  
31 296 are presented in Supplement 5). As expected, only few of the investigated imaging parameters  
32  
33 297 reached statistical significance, potentially due to the lower power resulting from the smaller group  
34  
35 298 sizes than in the main analysis (Supplement 3.3). Nevertheless, in chronic systemic glucocorticoid  
36  
37 299 users, global volumes showed the same patterns of reduction as in the main analysis, and the  
38  
39 300 caudate showed a larger increase in subcortical volume, but a smaller increase in grey matter  
40  
41 301 volume. For chronic inhaled glucocorticoid users, the patterns were like those in the main analysis,  
42  
43 302 with no striking differences in effect sizes (Supplements 3.3, 6, and 7).

44  
45  
46  
47  
48  
49  
50  
51  
52  
53  
54  
55  
56  
57  
58  
59  
60  
303  
304

305 **Table 2. Imaging parameters, presented as the adjusted mean difference of patients using systemic glucocorticoids (n = 222) or inhaled glucocorticoids (n**  
 306 **= 557) compared with controls (n = 24106)**

307

|                                                         | ANOVA   |         |                  | Systemic GC vs. controls |              |               | Inhaled GC vs. controls |              |               |
|---------------------------------------------------------|---------|---------|------------------|--------------------------|--------------|---------------|-------------------------|--------------|---------------|
|                                                         | F value | P value | P <sub>FDR</sub> | AMD*                     | 95% CI       | P value       | AMD*                    | 95% CI       | P value       |
| <i>Volumetric measures</i>                              |         |         |                  |                          |              |               |                         |              |               |
| <i>Global volumes (in mm<sup>3</sup>)</i>               |         |         |                  |                          |              |               |                         |              |               |
| Total brain volume                                      | 19.7    | 2.8e-9  | <b>1.0e-8</b>    | -3688                    | -10627; 3252 | 0.39          | 3374                    | -1012; 7760  | 0.16          |
| Grey matter volume                                      | 23.7    | 5.4e-11 | <b>6.5e-10</b>   | -1968                    | -5904; 1968  | 0.43          | 1012                    | -1476; 3500  | 0.57          |
| White matter volume                                     | 6.7     | 1.2e-3  | <b>2.0e-3</b>    | -1720                    | -6273; 2833  | 0.61          | 2362                    | -516; 5240   | 0.13          |
| Peripheral cortex                                       | 21.1    | 6.9e-10 | <b>6.2e-9</b>    | -3303                    | -6843; 237   | 0.072         | 1033                    | -1205; 3270  | 0.49          |
| CSF volume                                              | 10.1    | 4.2e-5  | <b>9.5e-5</b>    | 1215                     | -824; 3254   | 0.32          | 78                      | -1211; 1367  | 0.98          |
| <i>Subcortical volumes (in mm<sup>3</sup>)</i>          |         |         |                  |                          |              |               |                         |              |               |
| Accumbens                                               | 12.0    | 6.0e-6  | <b>1.7e-5</b>    | -13.1                    | -26.7; 0.5   | 0.062         | -6.5                    | -15.1; 2.1   | 0.17          |
| Caudate                                                 | 6.7     | 1.3e-3  | <b>2.0e-3</b>    | 77.8                     | 24.5; 131.1  | <b>0.0023</b> | -2.7                    | -36.4; 30.9  | 0.97          |
| Pallidum                                                | 7.7     | 4.5e-4  | <b>7.8e-4</b>    | 0.8                      | -29.9; 31.4  | 1.00          | -18.0                   | -37.3; 1.4   | 0.074         |
| Putamen                                                 | 10.9    | 1.8e-5  | <b>4.6e-5</b>    | -31.3                    | -98.2; 35.6  | 0.48          | -27.9                   | -70.2; 14.4  | 0.25          |
| Thalamus                                                | 8.2     | 2.7e-4  | <b>4.9e-4</b>    | 3.6                      | -74.0; 81.1  | 0.99          | -6.4                    | -55.4; 42.6  | 0.93          |
| <i>Regional grey matter volumes (in mm<sup>3</sup>)</i> |         |         |                  |                          |              |               |                         |              |               |
| Amygdala                                                | 23.8    | 5.0e-11 | <b>6.5e-10</b>   | -4.0                     | -31.9; 23.8  | 0.91          | -23.9                   | -41.5; -6.2  | <b>5.2e-3</b> |
| Caudate                                                 | 13.0    | 2.3e-6  | <b>7.5e-6</b>    | 178.7                    | 82.2; 275.0  | <b>1.0e-4</b> | 41.2                    | -19.8; 102.0 | 0.24          |
| Cerebellum                                              | 10.8    | 2.0e-5  | <b>4.8e-5</b>    | 25.1                     | -18.4; 68.5  | 0.34          | -12.2                   | -39.7; 15.3  | 0.51          |
| Insular cortex                                          | 8.5     | 2.0e-4  | <b>3.9e-4</b>    | -36.2                    | -108.4; 36.0 | 0.43          | 5.0                     | -40.6; 50.7  | 0.95          |

|                              |      |         |                |         |                  |               |         |                  |                    |
|------------------------------|------|---------|----------------|---------|------------------|---------------|---------|------------------|--------------------|
| Precuneal cortex             | 5.5  | 4.3e-3  | <b>5.6e-3</b>  | -21.5   | -179.0; 136.3    | 0.92          | -7.4    | -107.0; 92.4     | 0.97               |
| <b>DTI measures</b>          |      |         |                |         |                  |               |         |                  |                    |
| <i>Fractional anisotropy</i> |      |         |                |         |                  |               |         |                  |                    |
| Global                       | 19.2 | 4.6e-9  | <b>2.8e-8</b>  | -0.0037 | -0.0064; -0.0010 | <b>4.2e-3</b> | -0.0023 | -0.0040; -5.7e-4 | <b>5.7e-3</b>      |
| Body of corpus callosum      | 10.0 | 4.7e-5  | <b>1.0e-4</b>  | -0.0043 | -0.0084; -1.2e-4 | <b>0.043</b>  | -0.0023 | -0.0049; 3.0e-4  | 0.092              |
| Genu of corpus callosum      | 16.8 | 5.4e-8  | <b>2.1e-7</b>  | -0.0064 | -0.011; -0.0017  | <b>5.0e-3</b> | -0.0019 | -0.0049; 0.0011  | 0.27               |
| Splenium of corpus callosum  | 5.4  | 4.4e-3  | <b>5.6e-3</b>  | -0.0021 | -0.0053; 0.0012  | 0.27          | -0.0032 | -0.0052; -0.0012 | <b>1.0e-3</b>      |
| Cingulum cingulate           | 6.1  | 2.4e-3  | <b>3.4e-3</b>  | -0.0017 | -0.0062; 0.0028  | 0.61          | -0.0028 | -0.0057; 8.9e-6  | 0.051              |
| Cingulum hippocampus         | 6.4  | 1.7e-3  | <b>2.5e-3</b>  | 6.5e-5  | -0.0046; 0.0048  | 1.00          | -3.4e-3 | -0.0063; -3.8e-4 | <b>0.024</b>       |
| <i>Mean diffusivity</i>      |      |         |                |         |                  |               |         |                  |                    |
| Global                       | 25.9 | 5.8e-12 | <b>2.1e-10</b> | 7.2e-6  | 3.2e-6; 1.1e-5   | <b>1.0e-4</b> | 2.7e-6  | 1.7e-7; 5.2e-6   | <b>0.034</b>       |
| Body of corpus callosum      | 15.5 | 2.0e-7  | <b>7.0e-7</b>  | 6.9e-6  | 1.7e-6; 1.2e-5   | <b>6.0e-3</b> | 4.8e-6  | 1.6e-6; 8.1e-6   | <b>2.0e-3</b>      |
| Genu of corpus callosum      | 18.0 | 1.6e-8  | <b>7.0e-8</b>  | 8.4e-6  | 2.2e-6; 1.5e-5   | <b>4.9e-3</b> | 4.1e-6  | 1.7e-7; 8.0e-6   | <b>0.039</b>       |
| Splenium of corpus callosum  | 9.7  | 6.2e-5  | <b>1.2e-4</b>  | 4.4e-6  | -3.8e-8; 8.9e-6  | 0.050         | 5.3e-6  | 2.4e-6; 8.1e-6   | <b>1.0e-4</b>      |
| Cingulum cingulate           | 5.4  | 4.3e-3  | <b>5.6e-3</b>  | 2.9e-6  | -8.5e-7; 6.6e-6  | 0.16          | 2.8e-6  | 4.7e-7; 5.2e-6   | <b>0.015</b>       |
| Cingulum hippocampus         | 18.5 | 9.1e-9  | <b>4.7e-8</b>  | 5.0e-6  | 4.2e-7; 9.5e-6   | <b>0.029</b>  | 5.6e-6  | 2.8e-6; 8.5e-6   | <b>&lt;1.03e-4</b> |
| Uncinate fasciculus          | 12.1 | 5.4e-6  | <b>1.6e-5</b>  | 6.4e-6  | 2.2e-6; 1.1e-5   | <b>1.4e-3</b> | 2.2e-6  | -4.4e-7; 4.9e-6  | 0.12               |

308

309 \* Adjusted mean difference, calculated using linear models, adjusted for age, sex, education, X-, Y-, and Z-position of the head in the scanner, head size,  
 310 assessment centre, and year of imaging acquisition; significance was determined using a post-hoc Dunnett's test.

311 CI, confidence interval;  $P_{FDR}$ , Benjamini-Hochberg false discovery rate corrected P values. P values in bold are statistically significant ( $P < 0.05$ ).



### 312 *Diffusion imaging parameters*

313 All but one of the diffusion imaging parameters differed significantly across the groups. Post-hoc  
314 tests showed that systemic glucocorticoid use was associated with reduced global FA (AMD =  $-3.7e-3$ ,  
315 95% CI =  $-6.4e-3$  to  $1.0e-3$ ), and reductions in regional FA were observed in the body and genu of the  
316 corpus callosum (Table 2, Figure 3, Supplement 4). Similarly, inhaled glucocorticoid use was  
317 associated with reduced global FA (AMD =  $-2.3e-3$ , 95% CI =  $-4.0e-3$  to  $-5.7e-4$ ), and the splenium of  
318 the corpus callosum and the cingulum of the hippocampus also showed a lower FA. For most ROIs,  
319 reductions in FA were smaller in inhaled glucocorticoid users than in systemic glucocorticoid users.

320 Furthermore, global MD was higher in systemic glucocorticoid users (AMD =  $7.2e-6$ , 95% CI =  
321  $3.2e-6$  to  $1.1e-5$ ) and inhaled glucocorticoid users compared with controls (AMD =  $2.7e-6$ , 95% CI =  
322  $1.7e-7$  to  $5.2e-6$ ). Systemic glucocorticoid was associated with higher regional MD in the body and  
323 genu of the corpus callosum, the cingulum of the hippocampus, and the uncinate gyrus. Inhaled  
324 glucocorticoid use showed significant associations with increased MD in the body, genu, and  
325 splenium of the corpus callosum, the cingulum of the cingulate cortex, and the cingulum of the  
326 hippocampus. Again, effect sizes were similar or smaller for most tracts compared with the  
327 associations observed in systemic glucocorticoid users.

328 For chronic glucocorticoid users, the tendencies of FA and MD outcomes were in the same  
329 direction as the main analysis for all ROIs. Almost all associations with global and regional FA and MD  
330 showed a greater effect size among chronic systemic glucocorticoid users than in the main analysis,  
331 although only the global FA and MD measures, and FA and MD in the genu of the corpus callosum  
332 reached significance. In chronic inhaled glucocorticoid users, however, the effect sizes were not  
333 remarkably different from those observed in the main analysis (Supplements 3.3, 6, and 7).

### 335 *Cognitive and emotional outcomes*

336 ANOVA showed differences between the groups on three cognitive tasks: trail making A, trail making  
337 B, and symbol substitution (Supplement 3.4). Post-hoc testing revealed that systemic glucocorticoid  
338 users performed significantly worse on the symbol digit substitution task compared with controls  
339 (AMD =  $-0.17$  SD, 95% CI =  $-0.34$  to  $-0.01$ ; Table 3). With regards to the emotional outcomes,  
340 between-group differences were observed in the frequency of depressive symptoms ( $P = 0.0049$ ),  
341 disinterest ( $P = 0.0049$ ), tenseness/restlessness ( $P = 0.0025$ ) and tiredness/lethargy ( $P = 3.7e-7$ )  
342 (Supplements 3.5 and 8). Pairwise comparisons using logistic regression analysis revealed that  
343 systemic glucocorticoid users experienced more depressive symptoms (OR = 1.76, 95% CI = 1.25 to  
344 2.43), disinterest (OR = 1.84, 95% CI = 1.29 to 2.56), tenseness/restlessness (OR = 1.78, 95% CI = 1.29  
345 to 2.41), and tiredness/lethargy (OR = 1.90, 95% CI = 1.45 to 2.50) compared with controls (Table 4),

1  
2  
3 346 while inhaled glucocorticoid users only reported more tiredness/lethargy than controls (OR = 1.35,  
4  
5 347 95% CI = 1.14 to 1.60).

6 348 For the chronic users, none of the cognitive outcomes was significantly different in systemic  
7  
8 349 or inhaled glucocorticoid users compared with controls in the post-hoc analysis. Effect sizes for  
9  
10 350 chronic systemic glucocorticoid users were even smaller than in the entire cohort, while two out of  
11  
12 351 three were slightly larger in the chronic inhaled glucocorticoid users compared with the entire cohort  
13  
14 352 (Supplements 3.6 and 9). Likewise, the emotional outcome parameters did not differ significantly,  
15  
16 353 except for tiredness/lethargy which was more common in inhaled glucocorticoid users compared  
17  
18 354 with controls. Remarkably, most odds ratios were lower than in the main analysis (Supplements 3.7  
19  
20 355 and 10).

21 356  
22 357  
23 358  
24  
25 359  
26  
27  
28  
29  
30  
31  
32  
33  
34  
35  
36  
37  
38  
39  
40  
41  
42  
43  
44  
45  
46  
47  
48  
49  
50  
51  
52  
53  
54  
55  
56  
57  
58  
59  
60

1  
2  
3  
4  
5  
6  
7  
8  
9  
10  
11  
12  
13  
14  
15  
16  
17  
18  
19  
20  
21  
22  
23  
24  
25  
26  
27  
28  
29  
30  
31  
32  
33  
34  
35  
36  
37  
38  
39  
40  
41  
42  
43  
44  
45  
46

360 **Table 3. Cognitive outcome measures of patients using systemic glucocorticoids (n = 222) or inhaled glucocorticoids (n = 557) compared with controls**

361

|                            | ANOVA   |         |                  | Systemic GC vs. controls |              |             | Inhaled GC vs. controls |             |         | Participants with available data, n (%) |            |            |
|----------------------------|---------|---------|------------------|--------------------------|--------------|-------------|-------------------------|-------------|---------|-----------------------------------------|------------|------------|
|                            | F value | P value | P <sub>FDR</sub> | AMD*                     | 95% CI       | P value     | AMD*                    | 95% CI      | P value | Systemic GC                             | Inhaled GC | Controls   |
| <b>Trail making A</b>      | 5.6     | 0.0036  | <b>7.3e-3</b>    | -0.11                    | -0.28; 0.06  | 0.25        | -0.031                  | -0.15; 0.09 | 0.78    | 149 (67)                                | 296 (53)   | 16419 (68) |
| <b>Trail making B</b>      | 6.1     | 0.0023  | <b>6.8e-3</b>    | -0.12                    | -0.30; 0.05  | 0.19        | -0.0077                 | -0.13; 0.11 | 0.98    | 139 (63)                                | 291 (52)   | 16071 (67) |
| <b>Symbol substitution</b> | 10.3    | 3.5e-5  | <b>2.1e-4</b>    | -0.17                    | -0.34; -0.01 | <b>0.04</b> | -0.035                  | -0.15; 0.08 | 0.72    | 146 (66)                                | 298 (54)   | 16442 (68) |

362

363 \* Adjusted mean difference between patients and controls, expressed in Z scores. Calculated using linear models, adjusting for age, sex, and education.

364 Trail making A, and trail making B were log transformed before generation of Z scores because they were non-normally distributed. Variables were

365 transformed such that higher values indicate a better performance. Significance was determined using a post-hoc Dunnett’s test.

366 CI, confidence interval; GC, glucocorticoids; n, number; P<sub>FDR</sub>, Benjamini-Hochberg false discovery rate corrected P values.

367 P values in bold are statistically significant (P < 0.05).

368

369 **Table 4. Likelihood of experiencing mental health complaints in the past two weeks of systemic**  
 370 **glucocorticoid users (n = 222) and inhaled glucocorticoid users (n = 557) compared with controls**

371

|                    | Likelihood ratio test |         |                  | Systemic GC vs. controls |            |               | Inhaled GC vs. controls |            |               |
|--------------------|-----------------------|---------|------------------|--------------------------|------------|---------------|-------------------------|------------|---------------|
|                    | X <sup>2</sup>        | P value | P <sub>FDR</sub> | OR                       | 95% CI     | P value       | OR                      | 95% CI     | P value       |
| <b>Depression</b>  | 10.6                  | 0.0049  | 0.0049           | 1.76                     | 1.25; 2.43 | <b>8.2e-4</b> | 1.10                    | 0.87; 1.38 | 0.43          |
| <b>Disinterest</b> | 10.9                  | 0.0043  | 0.0049           | 1.84                     | 1.29; 2.56 | <b>5.1e-4</b> | 1.06                    | 0.82; 1.36 | 0.64          |
| <b>Tenseness</b>   | 13.4                  | 0.0012  | 0.0025           | 1.78                     | 1.29; 2.41 | <b>3.0e-4</b> | 1.16                    | 0.92; 1.43 | 0.19          |
| <b>Tiredness</b>   | 32.4                  | 9.2e-8  | 3.7e-7           | 1.90                     | 1.45; 2.50 | <b>4.4e-6</b> | 1.35                    | 1.14; 1.60 | <b>6.3e-4</b> |

372

373 Calculated using logistic regression analysis, adjusting for age, sex, and education.

374 P values in bold are statistically significant after Bonferroni correction for family-wise error rate of  
 375 two tests (P < 0.025).

376 CI, confidence interval; GC, glucocorticoids; OR, odds ratio; P<sub>FDR</sub>, Benjamini-Hochberg false discovery  
 377 rate corrected P values.

378

379

1  
2  
3 380 *Sensitivity analyses*

4  
5 381 In the first sensitivity analysis we included the subjects that were previously excluded based on  
6 382 neurological, psychiatric, or endocrine history or medication use. The imaging outcomes were  
7  
8 383 comparable to those of the main analysis, with similar ROIs showing significant differences between  
9  
10 384 the groups (Supplements 3.8 to 3.10, and Supplements 11 to 15), although the differences in  
11 385 diffusion parameters between glucocorticoid users and controls were more pronounced in the main  
12 386 analysis than in the unselected group. The same was observed for the cognitive and emotional  
13 387 outcomes.

14  
15  
16 388 For the second sensitivity analysis, outliers of the imaging and cognitive outcomes (<3% for  
17 389 most parameters) were excluded (Supplements 3.11 to 3.14, and Supplements 16 and 17), which led  
18 390 to the same conclusions for the imaging outcomes, except for a small number of regions that had  
19 391 shown a tendency in the main analysis and reached significance after exclusion of outlier values  
20 392 (subcortical accumbens volume, insular grey matter volume, and MD in the splenium of the corpus  
21 393 callosum; all in systemic glucocorticoid users). For the cognitive outcomes, exclusion of outliers  
22 394 resulted in not only a significant reduced score on the symbol digit substitution test, but also on the  
23 395 trail making B test for the systemic glucocorticoid users.

24  
25  
26  
27  
28  
29  
30 396

31 397 *Mediation analyses*

32  
33 398 To assess whether total body fat percentage could have mediated the association between  
34 399 glucocorticoid use and brain volume and white matter microstructure, mediation analysis was  
35 400 performed. For none of the investigated imaging outcomes was a significant mediation effect by  
36 401 body fat percentage found (Supplement 3.15), suggesting that the observed associations were  
37 402 independent of body fat.

38  
39  
40  
41 403  
42  
43  
44  
45  
46  
47  
48  
49  
50  
51  
52  
53  
54  
55  
56  
57  
58  
59  
60

## 404 Discussion

405 This study shows that in the large population-based cohort of the UK Biobank, the use of not only  
406 systemic glucocorticoids but also inhaled glucocorticoids is associated with changes in several brain  
407 imaging parameters. Most notably, the previously reported glucocorticoid effects on white matter  
408 microstructure<sup>32</sup> were also detected in this population and are therefore likely to be widespread  
409 amongst glucocorticoid users. Subgroup analyses among people using chronic glucocorticoids  
410 suggested a potential dose-dependent or duration-dependent effect of glucocorticoids on white  
411 matter microstructure, with smallest effect sizes in inhaled glucocorticoid users, larger effect sizes in  
412 systemic glucocorticoid users, and the largest effect sizes in chronic systemic glucocorticoid users.  
413 While it remains unclear whether the observed effect sizes have clinical consequences for the  
414 population of glucocorticoid users as a whole, these findings are remarkable given the common  
415 neuropsychiatric side effects of synthetic glucocorticoids, and the observed changes may play a role  
416 in those patients suffering from these side effects.

417

### 418 *Findings in context*

419 Previous studies in people exposed to high levels of endogenous glucocorticoids due to Cushing  
420 disease or high-dose synthetic systemic glucocorticoids have shown that glucocorticoid overexposure  
421 is associated with global cerebral atrophy and cortical thinning, as well as volumetric changes in  
422 specific brain areas. For example, reductions of grey matter volume have been observed in the  
423 hippocampus<sup>14, 24, 25, 27, 30, 31, 54</sup>, amygdala<sup>18, 28, 55</sup>, cingulate cortex<sup>13, 22, 23</sup>, insula<sup>13</sup>, caudate<sup>19</sup>, and  
424 cerebellum<sup>17, 25, 26</sup>, which have all been implicated in cognitive processes and emotional regulation<sup>56-</sup>  
425<sup>61</sup>. However, not all findings were consistent across studies, which may in part be due to differences  
426 between patient populations (e.g., with respect to duration and type of glucocorticoid exposure), the  
427 small sample sizes of the studies, and the different analysis methods used, with some studies only  
428 focussing on one specific brain region, and others performing whole-brain analysis. In general,  
429 studies have mainly been dedicated to structural imaging with a specific interest in grey matter  
430 volume, while diffusion imaging has only been performed by a few studies in patients with Cushing  
431 disease<sup>32-35</sup>.

432 The present study extends these findings by investigating brain volumes and white matter  
433 microstructure in not only systemic glucocorticoid users, but also inhaled glucocorticoid users, in  
434 whom neuropsychiatric side effects have been reported too<sup>62</sup>. The most remarkable and consistent  
435 associations were observed in white matter integrity, as both systemic and inhaled glucocorticoid  
436 use was associated with widespread reductions in FA and increases in MD. Although these  
437 associations were only about 10% of the effect sizes previously found in Cushing patients<sup>32</sup>, this adds  
438 to the growing body of literature suggesting that glucocorticoids have important impact on white

1  
2  
3 439 matter, and that non-neuronal cells such as oligodendrocytes are very sensitive to glucocorticoids.  
4  
5 440 Animal studies have shown that glucocorticoid exposure inhibits proliferation of oligodendrocyte  
6  
7 441 progenitor cells throughout the white matter<sup>63</sup>, and induce changes in the expression of myelin basic  
8  
9 442 protein (MBP), an oligodendrocyte marker<sup>36, 64</sup>. Since oligodendrocytes are responsible for myelin  
10  
11 443 production, glucocorticoid-induced changes in oligodendrocytes may underly the reduced white  
12  
13 444 matter microstructure observed in patients using glucocorticoids. Besides oligodendrocytes, other  
14  
15 445 glia cells including microglia and astrocytes are also affected by glucocorticoids, with multiple reports  
16  
17 446 of decreased cell viability, proliferation, and immunoreactivity of microglia and astrocytes in  
18  
19 447 response to glucocorticoids<sup>65-68</sup>.

20  
21 448 Although we observed some patterns in global and regional brain volumes in glucocorticoid  
22  
23 449 users, most of these did not reach significance. Rather surprisingly, although none of the global  
24  
25 450 volumes was significantly different between patients and controls, the direction of change for all the  
26  
27 451 areas was different for systemic (decreased volumes) vs. inhaled glucocorticoid users (increased  
28  
29 452 volumes). We did observe a significant association between inhaled glucocorticoid use and  
30  
31 453 decreased grey matter volume of the amygdala, and systemic glucocorticoid use was associated with  
32  
33 454 an increase in total and grey matter volume of the caudate nucleus. Decreased amygdala volumes  
34  
35 455 have previously been reported in chronic systemic glucocorticoid users<sup>18, 28, 55</sup>. However, the increase  
36  
37 456 in caudate volume contrasts with two previous studies that found larger caudate volumes after  
38  
39 457 treatment of Cushing disease compared with during active disease<sup>19, 20</sup>, while one other study  
40  
41 458 reported an increased caudate volume in remitted patients compared with controls, but no  
42  
43 459 differences in patients with active Cushing disease compared with controls<sup>21</sup>. Those findings suggest  
44  
45 460 that cortisol excess caused a decreased caudate volume in these patients and/or that the caudate  
46  
47 461 volume increased in response to normalization of cortisol levels. The modest association of  
48  
49 462 glucocorticoid use with brain volumes in the present population-based cohort study could indicate  
50  
51 463 that white matter integrity is more sensitive to glucocorticoids than grey matter volume, and that  
52  
53 464 longer or higher glucocorticoid exposure is needed to also induce volumetric changes.

54  
55 465 It is tempting to relate these findings to glucocorticoid (GR) and mineralocorticoid receptor  
56  
57 466 (MR) expression profiles in the brain. Previously, our group correlated the expression of GR and MR  
58  
59 467 in several brain areas (data from the Allen Brain Atlas<sup>69</sup>) to the changes in brain volume observed in  
60  
468 the extreme hypercortisolism caused by Cushing disease.<sup>23</sup> We then concluded that, although a high  
469 expression of these receptors was seen in the key brain areas such as the hippocampus, anterior  
470 cingulate cortex, and amygdala, there was no clear correlation between receptor expression profiles  
471 and brain areas affected by hypercortisolism. Receptor expression appears necessary but not  
472 predictive in this case. One might speculate that whether an area is affected by glucocorticoids may  
473 be more related to the densities of specific cell types that are responsive to glucocorticoids than the

1  
2  
3 474 expression of receptors per se. Perhaps the density of oligodendrocytes, which are increasingly  
4  
5 475 recognized as glucocorticoid-responsive, could be an important factor determining the  
6  
7 476 responsiveness of different brain areas to glucocorticoids.  
8  
9 477

#### 10 478 *Potential consequences and implications*

11 479 It is well-known that exogenous glucocorticoids are associated with neuropsychiatric side effects,  
12  
13 480 including not only potentially severe mood disturbances such as depression and mania, but also  
14  
15 481 cognitive impairment such as concentration and memory problems<sup>10</sup>. In the present study,  
16  
17 482 glucocorticoid users reported a higher frequency of several mental health complaints, while their  
18  
19 483 cognitive performance was not significantly different, except for worse scores on the symbol digit  
20  
21 484 substitution task in systemic glucocorticoid users. It should be noted that only a few mood-related  
22  
23 485 parameters assessed by the UK Biobank were selected for this study, because these were the only  
24  
25 486 parameters that applied specifically to the previous two weeks, in which the glucocorticoid users  
26  
27 487 were likely already using their medication. Ideally, more aspects of mood would have been assessed  
28  
29 488 to get a more comprehensive view on the glucocorticoid users' psychological functioning.  
30  
31 489 Furthermore, the observed mood-related effects may not be caused by glucocorticoid use per se but  
32  
33 490 could also be related to the condition for which glucocorticoids were prescribed. For example,  
34  
35 491 autoimmune and inflammatory diseases commonly treated with glucocorticoids, such as rheumatoid  
36  
37 492 arthritis and chronic obstructive pulmonary disorder, have also been associated with mental health  
38  
39 493 impairment and reduced quality of life<sup>70, 71</sup>.

40  
41 494 Nevertheless, awareness for the potential of glucocorticoids to affect the brain and cause  
42  
43 495 neuropsychiatric symptoms is important, since these medications are prescribed for a wide range of  
44  
45 496 conditions by many different medical specialties and are used by a substantial proportion of the  
46  
47 497 population. Moreover, further research into the underlying mechanisms, reversibility, and risk  
48  
49 498 factors for development of neuropsychiatric side effects of glucocorticoids is warranted, ideally  
50  
51 499 considering dose and duration of glucocorticoids, as well as single nucleotide polymorphisms (SNPs)  
52  
53 500 in the glucocorticoid receptor gene (NR3C1) that affect glucocorticoid sensitivity. For those patients  
54  
55 501 experiencing side effects, alternative treatment options should also be investigated. One promising  
56  
57 502 direction is the development of selective GR modulators, since these (ideally) only activate the  
58  
59 503 desired downstream signalling pathways in the desired cell types, limiting the potential side effects  
60  
61 504<sup>72, 73</sup>.

#### 505 506 *Strengths and limitations*

507 To the best of our knowledge, this is the largest study to date assessing the association between  
508  
509 508 glucocorticoid use and brain structure, and the first to investigate these associations in inhaled



1  
2  
3 509 glucocorticoid users. For the selection of patients and controls, we applied relatively strict exclusion  
4 510 criteria to limit the potential confounding that may arise in observational cohort studies. Although  
5 511 not all neurological disorders, especially peripheral disorders, may have a clear impact on brain  
6 512 volume or white matter microstructure, UK Biobank participants with these conditions were  
7  
8 513 excluded to prevent any confounding by these comorbidities. Our sensitivity analysis suggested that  
9 514 these conditions did not have a large impact on the results. However, we decided not to exclude  
10 515 patients with a history of depression, anxiety, mania, or delirium, because these are known possible  
11 516 consequences of glucocorticoid use<sup>10</sup>, and we did not want to exclude patients based on potentially  
12 517 glucocorticoid-related outcomes.

18 518 Another method used to limit confounding was adjustment of the regression analyses for  
19 519 relevant confounding variables, including demographic variables and variables related to the imaging  
20 520 visits (e.g., assessment centre, position of the head in the scanner). For both the volumetric and  
21 521 diffusion parameters, head size was used as covariate, because previous research not only found a  
22 522 relation between head size and brain volume, but also between head size and DTI parameters<sup>74, 75</sup>.  
23 523 The use of this variable as covariate is also recommended by the UK Biobank<sup>46</sup>. We decided not to  
24 524 include a measure of body weight or body composition as covariate, because it is known that  
25 525 glucocorticoids can cause obesity<sup>7</sup>, which is therefore more likely to be in the causal pathway than to  
26 526 be a confounder. Our mediation analysis, however, suggested that body fat percentage did not  
27 527 mediate the associations identified. Nevertheless, despite the correction for a wide range of  
28 528 potential confounders, it should be noted that the possibility of residual confounding cannot be  
29 529 excluded.

38 530 In addition, although a causal relation between glucocorticoid use and changes in the brain is  
39 531 likely based on the present and previous studies, the cross-sectional nature of this study does not  
40 532 allow for formal conclusions on causality. Demonstrating a dose-response effect of glucocorticoid on  
41 533 imaging parameters would have increased the likelihood of a causal relation, but unfortunately, dose  
42 534 and duration of medication use were not available in the UK Biobank. We were therefore only able to  
43 535 give an indication of a dose-response effect by performing separate analyses in systemic  
44 536 glucocorticoid users, inhaled glucocorticoid users (representing a group exposed to lower systemic  
45 537 concentration of glucocorticoids), and subgroups of patients using systemic or inhaled glucocorticoid  
46 538 chronically (representing groups with a longer duration and larger cumulative dose of glucocorticoid  
47 539 use). The fact that the effect sizes of the associations between glucocorticoid use and diffusion  
48 540 imaging parameters are generally largest in the chronic systemic glucocorticoid group, and smallest  
49 541 in the inhaled glucocorticoid group, indicates that a dose-dependent or duration-dependent effect  
50 542 may exist, although the expected lower power of the small chronic systemic glucocorticoid group  
51 543 likely precluded most associations from reaching significance. Moreover, while the association effect

1  
2  
3 544 size estimates were larger in chronic systemic glucocorticoid users compared with the main group  
4  
5 545 using systemic glucocorticoids, this difference was not observed among inhaled glucocorticoid users.  
6  
7 546 A potential explanation may be that inhaled glucocorticoids are generally prescribed for a longer  
8  
9 547 duration than systemic glucocorticoids, which is also reflected by the high percentage of inhaled  
10  
11 548 glucocorticoid users (326/592, 55%) that could be included in the subgroup of chronic users,  
12  
13 549 compared with the lower percentage of chronic systemic glucocorticoid users (48/234, 21%).

14  
15 550 Another limitation is that we could not differentiate between oral and parenteral  
16  
17 551 glucocorticoids because of the medication names used by the UK Biobank. We were therefore unable  
18  
19 552 to conduct separate analyses for these groups and analysed them together as systemic  
20  
21 553 glucocorticoid users. Also, 14 participants used both inhaled and systemic glucocorticoids. Since this  
22  
23 554 group was too small to analyse separately in a meaningful way, these participants were included in  
24  
25 555 the systemic group. Although simultaneous use of different glucocorticoids might be associated with  
26  
27 556 more profound changes in the brain, we do not expect that this association is larger than the effect  
28  
29 557 size differences that may exist because of differences in dosages of the systemic glucocorticoids.  
30  
31 558 Lastly, some seasonal patterns in glucocorticoid use may exist depending on the indications, which  
32  
33 559 we were unable to adjust for in the analyses.

34  
35 560

### 36 561 *Conclusion*

37 562 This study shows that both systemic and inhaled glucocorticoids are associated with an apparently  
38  
39 563 widespread reduction in white matter integrity, which may in part underly the neuropsychiatric side  
40  
41 564 effects observed in patients using glucocorticoids. Since these medications are widely used,  
42  
43 565 awareness of these associations is necessary across medical specialties, and research into alternative  
44  
45 566 treatment options is warranted.  
46  
47 567

1  
2  
3 568 **Declarations**

4  
5 569  
6 570 *Contributors:* JMA and OCM contributed to the study conception. MvdM designed the study,  
7  
8 571 performed the analyses, and wrote the first version of the manuscript. OMD contributed to the  
9  
10 572 statistical analyses. All authors read and commented on the manuscript and approved the final  
11  
12 573 version of the manuscript. MvdM and OCM are the guarantors of the manuscript and accept full  
13  
14 574 responsibility for the work and conduct of the study, had access to the data, and controlled the  
15  
16 575 decision to publish. The corresponding author attests that all listed authors meet authorship criteria  
17  
18 576 and that no others meeting the criteria have been omitted.

19  
20 577  
21 578 *Acknowledgments:* We would like to thank dr. Roula Tsonaka for her advice regarding the statistical  
22  
23 579 analysis, and dr. Steven van der Werff for his suggestion for this study.

24  
25 580  
26 581 *Competing interests:* All authors have completed the ICMJE uniform disclosure form at  
27  
28 582 <http://www.icmje.org/disclosure-of-interest/> and declare: MvdM received financial support from the  
29  
30 583 MD/PhD grant of the Leiden University Medical Center, and JMA received financial support from  
31  
32 584 CONACyT (the National Council for Science and Technology-Government of Mexico) for the  
33  
34 585 submitted work; OCM has received research grants and honorariums from Corcept Therapeutics, and  
35  
36 586 a speakers' fee from Ipsen; no other relationships or activities that could appear to have influenced  
37  
38 587 the submitted work.

39  
40 588  
41 589 *Funding:* The UK Biobank was established by the Wellcome Trust, Medical Research Council,  
42  
43 590 Department of Health, Scottish government, and Northwest Regional Development Agency. It also  
44  
45 591 received funding from the Welsh Government, the British Heart Foundation, Cancer Research UK,  
46  
47 592 and Diabetes UK. For the analyses presented in this manuscript, MvdM received a personal MD/PhD  
48  
49 593 grant of the Leiden University Medical Center, and JMA received support from CONACyT (the  
50  
51 594 National Council for Science and Technology-Government of Mexico).

52  
53 595  
54 596 *Role of the funding source:* The funding sources had no role in the study conduct, data collection,  
55  
56 597 analyses, data interpretation, and the decision to submit the manuscript.

57  
58 598  
59 599 *Ethics approval:* This study was performed under the ethical approval obtained by UK Biobank from  
60  
61 600 the National Health Service National Research Ethics Service (ref 11/NW/0382, 17 June 2011). Data  
62  
63 601 for the present study were obtained from the UK Biobank under application number 59004.

1  
2  
3 603 *Transparency declaration:* The manuscript's guarantors (MvdM and OCM) affirm that the manuscript  
4 604 is an honest, accurate, and transparent account of the study being reported; that no important  
5 605 aspects of the study have been omitted; and that any discrepancies from the study as planned have  
6 606 been explained.  
7  
8  
9

10 607

11 608 *Data availability statement:* Data used for this study are available via application to the UK Biobank.  
12  
13 609

14  
15 610 *Dissemination to participants and related patient and public communities:* Results of the study will be  
16 611 disseminated via the UK Biobank website, accessible for research participants and relevant patient  
17 612 and public communities.  
18  
19

20 613

21 614 *Checklist:* The STROBE checklist for observational studies can be found in Supplement 18.  
22  
23 615

24 616

25 617

26  
27  
28  
29  
30  
31  
32  
33  
34  
35  
36  
37  
38  
39  
40  
41  
42  
43  
44  
45  
46  
47  
48  
49  
50  
51  
52  
53  
54  
55  
56  
57  
58  
59  
60

618 **References**

- 619 1. Laugesen K, Jørgensen JOL, Petersen I, Sørensen HT. Fifteen-year nationwide trends in  
620 systemic glucocorticoid drug use in Denmark. *Eur J Endocrinol*. 2019;181(3):267-73.
- 621 2. Fardet L, Petersen I, Nazareth I. Prevalence of long-term oral glucocorticoid prescriptions in  
622 the UK over the past 20 years. *Rheumatology (Oxford)*. 2011;50(11):1982-90.
- 623 3. Overman RA, Yeh JY, Deal CL. Prevalence of oral glucocorticoid usage in the United States: a  
624 general population perspective. *Arthritis Care Res (Hoboken)*. 2013;65(2):294-8.
- 625 4. van Staa TP, Leufkens HG, Abenhaim L, Begaud B, Zhang B, Cooper C. Use of oral  
626 corticosteroids in the United Kingdom. *Qjm*. 2000;93(2):105-11.
- 627 5. Walsh LJ, Wong CA, Pringle M, Tattersfield AE. Use of oral corticosteroids in the community  
628 and the prevention of secondary osteoporosis: a cross sectional study. *Bmj*. 1996;313(7053):344-6.
- 629 6. Rhen T, Cidlowski JA. Antiinflammatory action of glucocorticoids--new mechanisms for old  
630 drugs. *N Engl J Med*. 2005;353(16):1711-23.
- 631 7. Fardet L, Fève B. Systemic glucocorticoid therapy: a review of its metabolic and  
632 cardiovascular adverse events. *Drugs*. 2014;74(15):1731-45.
- 633 8. Chalitsios CV, Shaw DE, McKeever TM. Risk of osteoporosis and fragility fractures in asthma  
634 due to oral and inhaled corticosteroids: two population-based nested case-control studies. *Thorax*.  
635 2021;76(1):21-8.
- 636 9. Savas M, Muka T, Wester VL, van den Akker ELT, Visser JA, Braunstahl GJ, et al. Associations  
637 Between Systemic and Local Corticosteroid Use With Metabolic Syndrome and Body Mass Index. *J*  
638 *Clin Endocrinol Metab*. 2017;102(10):3765-74.
- 639 10. Judd LL, Schettler PJ, Brown ES, Wolkowitz OM, Sternberg EM, Bender BG, et al. Adverse  
640 consequences of glucocorticoid medication: psychological, cognitive, and behavioral effects. *Am J*  
641 *Psychiatry*. 2014;171(10):1045-51.
- 642 11. Fardet L, Petersen I, Nazareth I. Suicidal behavior and severe neuropsychiatric disorders  
643 following glucocorticoid therapy in primary care. *Am J Psychiatry*. 2012;169(5):491-7.
- 644 12. Bourdeau I, Bard C, Noël B, Leclerc I, Cordeau MP, Bélair M, et al. Loss of brain volume in  
645 endogenous Cushing's syndrome and its reversibility after correction of hypercortisolism. *J Clin*  
646 *Endocrinol Metab*. 2002;87(5):1949-54.
- 647 13. Hou B, Gao L, Shi L, Luo Y, Guo X, Young GS, et al. Reversibility of impaired brain structures  
648 after transsphenoidal surgery in Cushing's disease: a longitudinal study based on an artificial  
649 intelligence-assisted tool. *J Neurosurg*. 2020:1-10.
- 650 14. Chen Y, Zhang J, Tan H, Li J, Yu Y. Detrimental effects of hypercortisolism on brain structure  
651 and related risk factors. *Sci Rep*. 2020;10(1):12708.
- 652 15. Santos A, Resmini E, Gómez-Ansón B, Crespo I, Granell E, Valassi E, et al. Cardiovascular risk  
653 and white matter lesions after endocrine control of Cushing's syndrome. *Eur J Endocrinol*.  
654 2015;173(6):765-75.
- 655 16. Simmons NE, Do HM, Lipper MH, Laws ER, Jr. Cerebral atrophy in Cushing's disease. *Surg*  
656 *Neurol*. 2000;53(1):72-6.
- 657 17. Momose KJ, Kjellberg RN, Kliman B. High incidence of cortical atrophy of the cerebral and  
658 cerebellar hemispheres in Cushing's disease. *Radiology*. 1971;99(2):341-8.
- 659 18. Merke DP, Giedd JN, Keil MF, Mehlinger SL, Wiggs EA, Holzer S, et al. Children experience  
660 cognitive decline despite reversal of brain atrophy one year after resolution of Cushing syndrome. *J*  
661 *Clin Endocrinol Metab*. 2005;90(5):2531-6.
- 662 19. Starkman MN, Giordani B, Gebarski SS, Berent S, Schork MA, Schteingart DE. Decrease in  
663 cortisol reverses human hippocampal atrophy following treatment of Cushing's disease. *Biol*  
664 *Psychiatry*. 1999;46(12):1595-602.
- 665 20. Starkman MN, Giordani B, Gebarski SS, Schteingart DE. Improvement in learning associated  
666 with increase in hippocampal formation volume. *Biol Psychiatry*. 2003;53(3):233-8.

- 1  
2  
3 667 21. Jiang H, Ren J, He NY, Liu C, Sun YH, Jian FF, et al. Volumetric magnetic resonance imaging  
4 668 analysis in patients with short-term remission of Cushing's disease. *Clin Endocrinol (Oxf)*.  
5 669 2017;87(4):367-74.  
6 670 22. Bauduin S, van der Pal Z, Pereira AM, Meijer OC, Giltay EJ, van der Wee NJA, et al. Cortical  
7 671 thickness abnormalities in long-term remitted Cushing's disease. *Transl Psychiatry*. 2020;10(1):293.  
8 672 23. Andela CD, van der Werff SJ, Pannekoek JN, van den Berg SM, Meijer OC, van Buchem MA, et  
9 673 al. Smaller grey matter volumes in the anterior cingulate cortex and greater cerebellar volumes in  
10 674 patients with long-term remission of Cushing's disease: a case-control study. *Eur J Endocrinol*.  
11 675 2013;169(6):811-9.  
12 676 24. Toffanin T, Nifosì F, Follador H, Passamani A, Zonta F, Ferri G, et al. Volumetric MRI analysis  
13 677 of hippocampal subregions in Cushing's disease: a model for glucocorticoid neural modulation. *Eur*  
14 678 *Psychiatry*. 2011;26(1):64-7.  
15 679 25. Burkhardt T, Lüdecke D, Spies L, Wittmann L, Westphal M, Flitsch J. Hippocampal and  
16 680 cerebellar atrophy in patients with Cushing's disease. *Neurosurg Focus*. 2015;39(5):E5.  
17 681 26. Santos A, Resmini E, Crespo I, Pires P, Vives-Gilabert Y, Granell E, et al. Small cerebellar cortex  
18 682 volume in patients with active Cushing's syndrome. *Eur J Endocrinol*. 2014;171(4):461-9.  
19 683 27. Brown ES, D JW, Frol A, Bobadilla L, Khan DA, Hanczyc M, et al. Hippocampal volume,  
20 684 spectroscopy, cognition, and mood in patients receiving corticosteroid therapy. *Biol Psychiatry*.  
21 685 2004;55(5):538-45.  
22 686 28. Desai S, Khanani S, Shad MU, Brown ES. Attenuation of amygdala atrophy with lamotrigine in  
23 687 patients receiving corticosteroid therapy. *J Clin Psychopharmacol*. 2009;29(3):284-7.  
24 688 29. Brown ES, Kulikova A, Van Enkevort E, Nakamura A, Ivleva EI, Tustison NJ, et al. A randomized  
25 689 trial of an NMDA receptor antagonist for reversing corticosteroid effects on the human  
26 690 hippocampus. *Neuropsychopharmacology*. 2019;44(13):2263-7.  
27 691 30. Nguyen DM, Yassa MA, Tustison NJ, Roberts JM, Kulikova A, Nakamura A, et al. The  
28 692 Relationship Between Cumulative Exogenous Corticosteroid Exposure and Volumes of Hippocampal  
29 693 Subfields and Surrounding Structures. *J Clin Psychopharmacol*. 2019;39(6):653-7.  
30 694 31. Brown ES, Jeon-Slaughter H, Lu H, Jamadar R, Issac S, Shad M, et al. Hippocampal volume in  
31 695 healthy controls given 3-day stress doses of hydrocortisone. *Neuropsychopharmacology*.  
32 696 2015;40(5):1216-21.  
33 697 32. van der Werff SJ, Andela CD, Nienke Pannekoek J, Meijer OC, van Buchem MA, Rombouts SA,  
34 698 et al. Widespread reductions of white matter integrity in patients with long-term remission of  
35 699 Cushing's disease. *Neuroimage Clin*. 2014;4:659-67.  
36 700 33. Pires P, Santos A, Vives-Gilabert Y, Webb SM, Sainz-Ruiz A, Resmini E, et al. White matter  
37 701 alterations in the brains of patients with active, remitted, and cured Cushing syndrome: a DTI study.  
38 702 *AJNR Am J Neuroradiol*. 2015;36(6):1043-8.  
39 703 34. Jiang H, He NY, Sun YH, Jian FF, Bian LG, Shen JK, et al. Altered gray and white matter  
40 704 microstructure in Cushing's disease: A diffusional kurtosis imaging study. *Brain Res*. 2017;1665:80-7.  
41 705 35. Pires P, Santos A, Vives-Gilabert Y, Webb SM, Sainz-Ruiz A, Resmini E, et al. White matter  
42 706 involvement on DTI-MRI in Cushing's syndrome relates to mood disturbances and processing speed:  
43 707 a case-control study. *Pituitary*. 2017;20(3):340-8.  
44 708 36. Amaya JM, Suidgeest E, Sahut-Barnola I, Dumontet T, Montanier N, Pagès G, et al. Effects of  
45 709 Long-Term Endogenous Corticosteroid Exposure on Brain Volume and Glial Cells in the AdKO Mouse.  
46 710 *Front Neurosci*. 2021;15:604103.  
47 711 37. Alexander AL, Lee JE, Lazar M, Field AS. Diffusion tensor imaging of the brain.  
48 712 *Neurotherapeutics*. 2007;4(3):316-29.  
49 713 38. Sudlow C, Gallacher J, Allen N, Beral V, Burton P, Danesh J, et al. UK Biobank: an open access  
50 714 resource for identifying the causes of a wide range of complex diseases of middle and old age. *PLoS*  
51 715 *Med*. 2015;12(3):e1001779.  
52 716 39. UK Biobank. UK Biobank Body Composition Measurement Version 1.0 2011 [Available from:  
53 717 [https://biobank.ndph.ox.ac.uk/ukb/ukb/docs/body\\_composition.pdf](https://biobank.ndph.ox.ac.uk/ukb/ukb/docs/body_composition.pdf).

- 1  
2  
3 718 40. Alfaro-Almagro F, Jenkinson M, Bangerter NK, Andersson JLR, Griffanti L, Douaud G, et al.  
4 719 Image processing and Quality Control for the first 10,000 brain imaging datasets from UK Biobank.  
5 720 Neuroimage. 2018;166:400-24.  
6 721 41. Smith SM, Alfaro-Almagro F, Miller KL. UK Biobank Brain Imaging Documentation 2020 [cited  
7 722 2022. Available from: [https://biobank.ndph.ox.ac.uk/showcase/ukb/docs/brain\\_mri.pdf](https://biobank.ndph.ox.ac.uk/showcase/ukb/docs/brain_mri.pdf).  
8 723 42. Zhang Y, Brady M, Smith S. Segmentation of brain MR images through a hidden Markov  
9 724 random field model and the expectation-maximization algorithm. IEEE Trans Med Imaging.  
10 725 2001;20(1):45-57.  
11 726 43. Patenaude B, Smith SM, Kennedy DN, Jenkinson M. A Bayesian model of shape and  
12 727 appearance for subcortical brain segmentation. Neuroimage. 2011;56(3):907-22.  
13 728 44. Smith SM, Jenkinson M, Johansen-Berg H, Rueckert D, Nichols TE, Mackay CE, et al. Tract-  
14 729 based spatial statistics: voxelwise analysis of multi-subject diffusion data. Neuroimage.  
15 730 2006;31(4):1487-505.  
16 731 45. Mori S, Wakana S, Van Zijl PC, Nagae-Poetscher L. MRI atlas of human white matter: Elsevier;  
17 732 2005.  
18 733 46. Alfaro-Almagro F, McCarthy P, Afyouni S, Andersson JLR, Bastiani M, Miller KL, et al.  
19 734 Confound modelling in UK Biobank brain imaging. Neuroimage. 2021;224:117002.  
20 735 47. Dekkers IA, Jansen PR, Lamb HJ. Obesity, Brain Volume, and White Matter Microstructure at  
21 736 MRI: A Cross-sectional UK Biobank Study. Radiology. 2019;292(1):270.  
22 737 48. Daley-Yates PT. Inhaled corticosteroids: potency, dose equivalence and therapeutic index. Br  
23 738 J Clin Pharmacol. 2015;80(3):372-80.  
24 739 49. R Core Team. R: A language and environment for statistical computing. Vienna, Austria: R  
25 740 Foundation for Statistical Computing; 2020 [Available from: <https://www.R-project.org/>.  
26 741 50. Wickham H AM, Bryan J, Chang W, McGowan LD, François R, Grolemund G, Hayes A, Henry L,  
27 742 Hester J, Kuhn M, Pedersen TL, Miller E, Bache SM, Müller K, Ooms J, Robinson D, Seidel DP, Spinu V,  
28 743 Takahashi K, Vaughan D, Wilke C, Woo K, Yutani H,. Welcome to the tidyverse. Journal of Open  
29 744 Source Software. 2019;4:1686.  
30 745 51. Fox J, Weisberg S. An R Companion to Applied Regression. Third ed. Thousand Oaks CA: Sage;  
31 746 2019.  
32 747 52. Zeileis A, Hothorn T. Diagnostic Checking in Regression Relationships. R News. 2002;2(3):7-  
33 748 10.  
34 749 53. Tingley D, Yamamoto T, Hirose K, Keele L, Imai K. mediation: R Package for Causal Mediation  
35 750 Analysis. Journal of Statistical Software. 2014;59(5):1-38.  
36 751 54. Resmini E, Santos A, Gómez-Anson B, Vives Y, Pires P, Crespo I, et al. Verbal and visual  
37 752 memory performance and hippocampal volumes, measured by 3-Tesla magnetic resonance imaging,  
38 753 in patients with Cushing's syndrome. J Clin Endocrinol Metab. 2012;97(2):663-71.  
39 754 55. Brown ES, Woolston DJ, Frol AB. Amygdala volume in patients receiving chronic  
40 755 corticosteroid therapy. Biol Psychiatry. 2008;63(7):705-9.  
41 756 56. Bartsch T, Wulff P. The hippocampus in aging and disease: From plasticity to vulnerability.  
42 757 Neuroscience. 2015;309:1-16.  
43 758 57. Pessoa L. Emotion and cognition and the amygdala: from "what is it?" to "what's to be  
44 759 done?". Neuropsychologia. 2010;48(12):3416-29.  
45 760 58. Rolls ET. The cingulate cortex and limbic systems for emotion, action, and memory. Brain  
46 761 Struct Funct. 2019;224(9):3001-18.  
47 762 59. Gasquoine PG. Contributions of the insula to cognition and emotion. Neuropsychol Rev.  
48 763 2014;24(2):77-87.  
49 764 60. Grahn JA, Parkinson JA, Owen AM. The role of the basal ganglia in learning and memory:  
50 765 neuropsychological studies. Behav Brain Res. 2009;199(1):53-60.  
51 766 61. Schmahmann JD, Caplan D. Cognition, emotion and the cerebellum. Brain. 2006;129(2):290-  
52 767 2.  
53  
54  
55  
56  
57  
58  
59  
60

- 1  
2  
3 768 62. Savas M, Vinkers CH, Rosmalen JGM, Hartman CA, Wester VL, van den Akker ELT, et al.  
4 769 Systemic and Local Corticosteroid Use Is Associated with Reduced Executive Cognition, and Mood  
5 770 and Anxiety Disorders. *Neuroendocrinology*. 2020;110(3-4):282-91.  
6 771 63. Alonso G. Prolonged corticosterone treatment of adult rats inhibits the proliferation of  
7 772 oligodendrocyte progenitors present throughout white and gray matter regions of the brain. *Glia*.  
8 773 2000;31(3):219-31.  
9 774 64. Miguel-Hidalgo JJ, Carter K, Deloach PH, Sanders L, Pang Y. Glucocorticoid-Induced  
10 775 Reductions of Myelination and Connexin 43 in Mixed Central Nervous System Cell Cultures Are  
11 776 Prevented by Mifepristone. *Neuroscience*. 2019;411:255-69.  
12 777 65. Unemura K, Kume T, Kondo M, Maeda Y, Izumi Y, Akaike A. Glucocorticoids decrease  
13 778 astrocyte numbers by reducing glucocorticoid receptor expression in vitro and in vivo. *J Pharmacol*  
14 779 *Sci*. 2012;119(1):30-9.  
15 780 66. Zhang H, Zhao Y, Wang Z. Chronic corticosterone exposure reduces hippocampal astrocyte  
16 781 structural plasticity and induces hippocampal atrophy in mice. *Neurosci Lett*. 2015;592:76-81.  
17 782 67. van Olst L, Bielefeld P, Fitzsimons CP, de Vries HE, Schouten M. Glucocorticoid-mediated  
18 783 modulation of morphological changes associated with aging in microglia. *Aging Cell*.  
19 784 2018;17(4):e12790.  
20 785 68. Freitas AE, Egea J, Buendia I, Gómez-Rangel V, Parada E, Navarro E, et al. Agmatine, by  
21 786 Improving Neuroplasticity Markers and Inducing Nrf2, Prevents Corticosterone-Induced Depressive-  
22 787 Like Behavior in Mice. *Mol Neurobiol*. 2016;53(5):3030-45.  
23 788 69. Allen Institute for Brain Science. Allen Brain Map 2020 [updated 2022; cited 2020. Available  
24 789 from: <https://portal.brain-map.org>.  
25 790 70. Machin AR, Babatunde O, Haththotuwa R, Scott I, Blagojevic-Bucknall M, Corp N, et al. The  
26 791 association between anxiety and disease activity and quality of life in rheumatoid arthritis: a  
27 792 systematic review and meta-analysis. *Clin Rheumatol*. 2020;39(5):1471-82.  
28 793 71. Pelgrim CE, Peterson JD, Gosker HR, Schols A, van Helvoort A, Garssen J, et al. Psychological  
29 794 co-morbidities in COPD: Targeting systemic inflammation, a benefit for both? *Eur J Pharmacol*.  
30 795 2019;842:99-110.  
31 796 72. Meijer OC, Koorneef LL, Kroon J. Glucocorticoid receptor modulators. *Ann Endocrinol (Paris)*.  
32 797 2018;79(3):107-11.  
33 798 73. Van Moortel L, Gevaert K, De Bosscher K. Improved Glucocorticoid Receptor Ligands:  
34 799 Fantastic Beasts, but How to Find Them? *Front Endocrinol (Lausanne)*. 2020;11:559673.  
35 800 74. Takao H, Hayashi N, Inano S, Ohtomo K. Effect of head size on diffusion tensor imaging.  
36 801 *Neuroimage*. 2011;57(3):958-67.  
37 802 75. Takao H, Hayashi N, Ohtomo K. Sex dimorphism in the white matter: fractional anisotropy  
38 803 and brain size. *J Magn Reson Imaging*. 2014;39(4):917-23.  
39 804  
40  
41  
42  
43  
44  
45  
46  
47  
48  
49  
50  
51  
52  
53  
54  
55  
56  
57  
58  
59  
60



## Figures

### Figure 1. Flowchart of participant inclusion

DWI, diffusion-weighted imaging; GC, glucocorticoids; n, number; T1, T1-weighted magnetic resonance imaging (MRI).

### Figure 2. Stepwise statistical analysis

ANOVA, analysis of variance; C, controls; FDR, false discovery rate correction; I, inhaled glucocorticoid users; n, number; S, systemic glucocorticoid users.

### Figure 3. Bar plots showing the adjusted mean difference (with 95% confidence interval) of all imaging parameters for patients using systemic glucocorticoids (GC) (n = 222) or inhaled GC (n = 557), and subgroups of chronic systemic GC users (n = 42), or chronic inhaled GC users (n = 305) vs. controls (n = 24106)

Significance levels compared with controls: \* P < 0.05, \*\* P < 0.01, \*\*\* P < 0.001. AU, arbitrary unit.

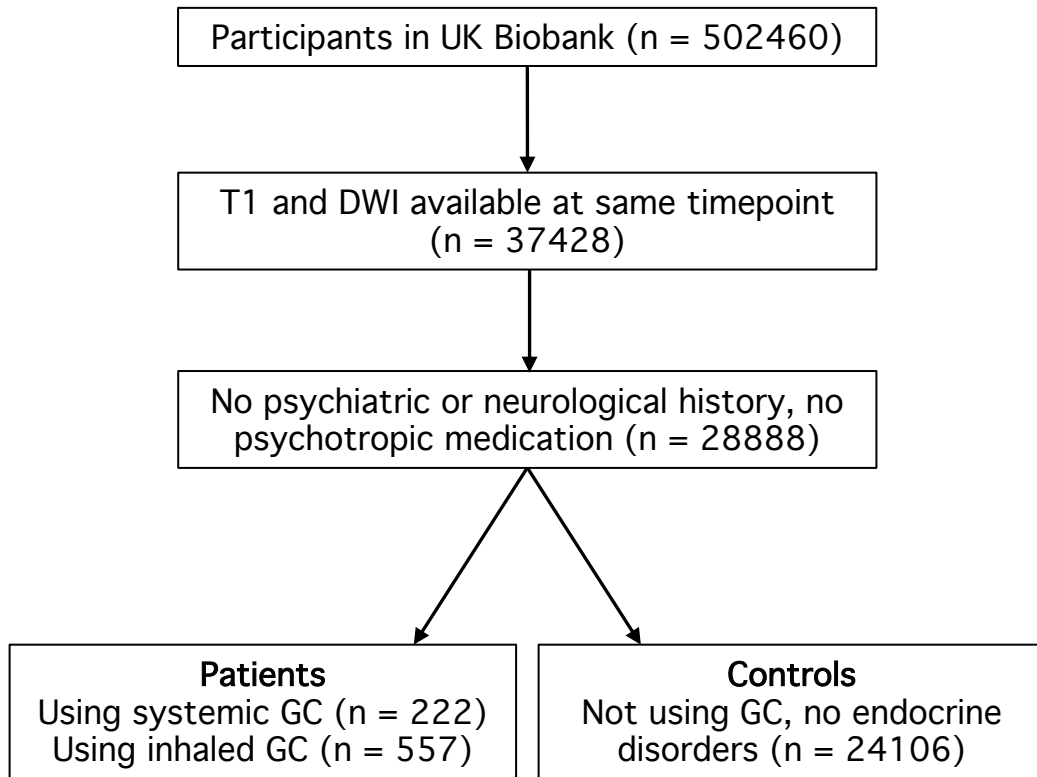

1  
2  
3  
4  
5  
6  
7  
8  
9  
10  
11  
12  
13  
14  
15  
16  
17  
18  
19  
20  
21  
22  
23  
24  
25  
26  
27  
28  
29  
30  
31  
32  
33  
34  
35  
36  
37  
38  
39  
40  
41

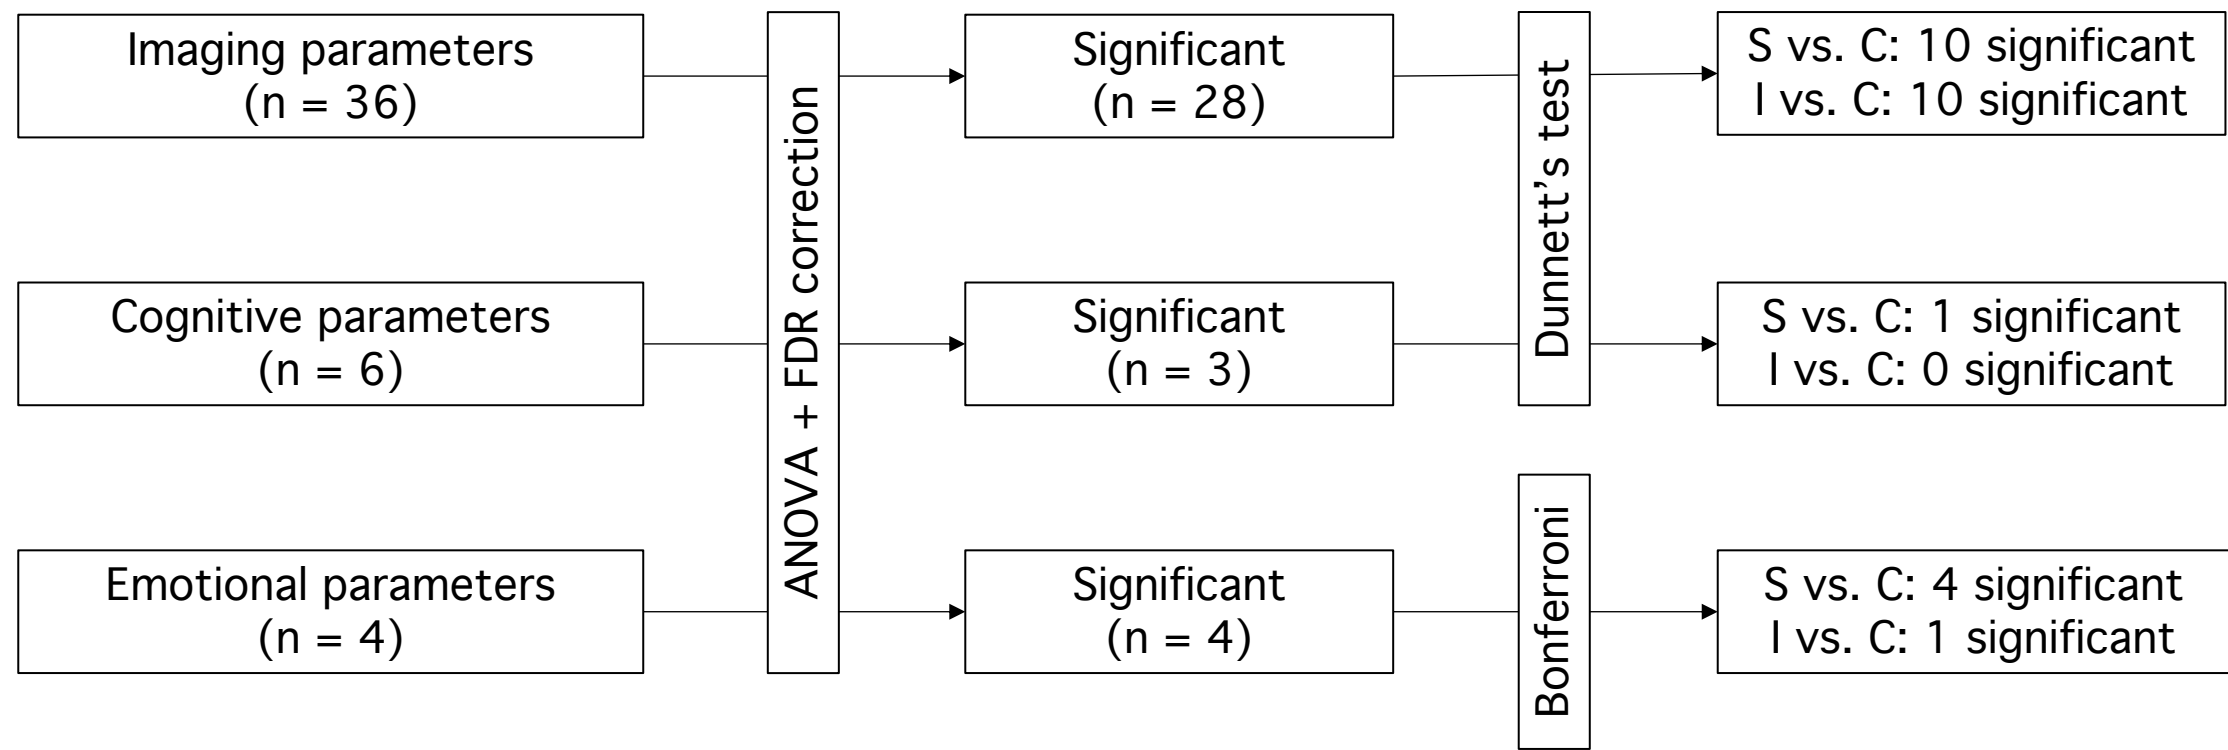

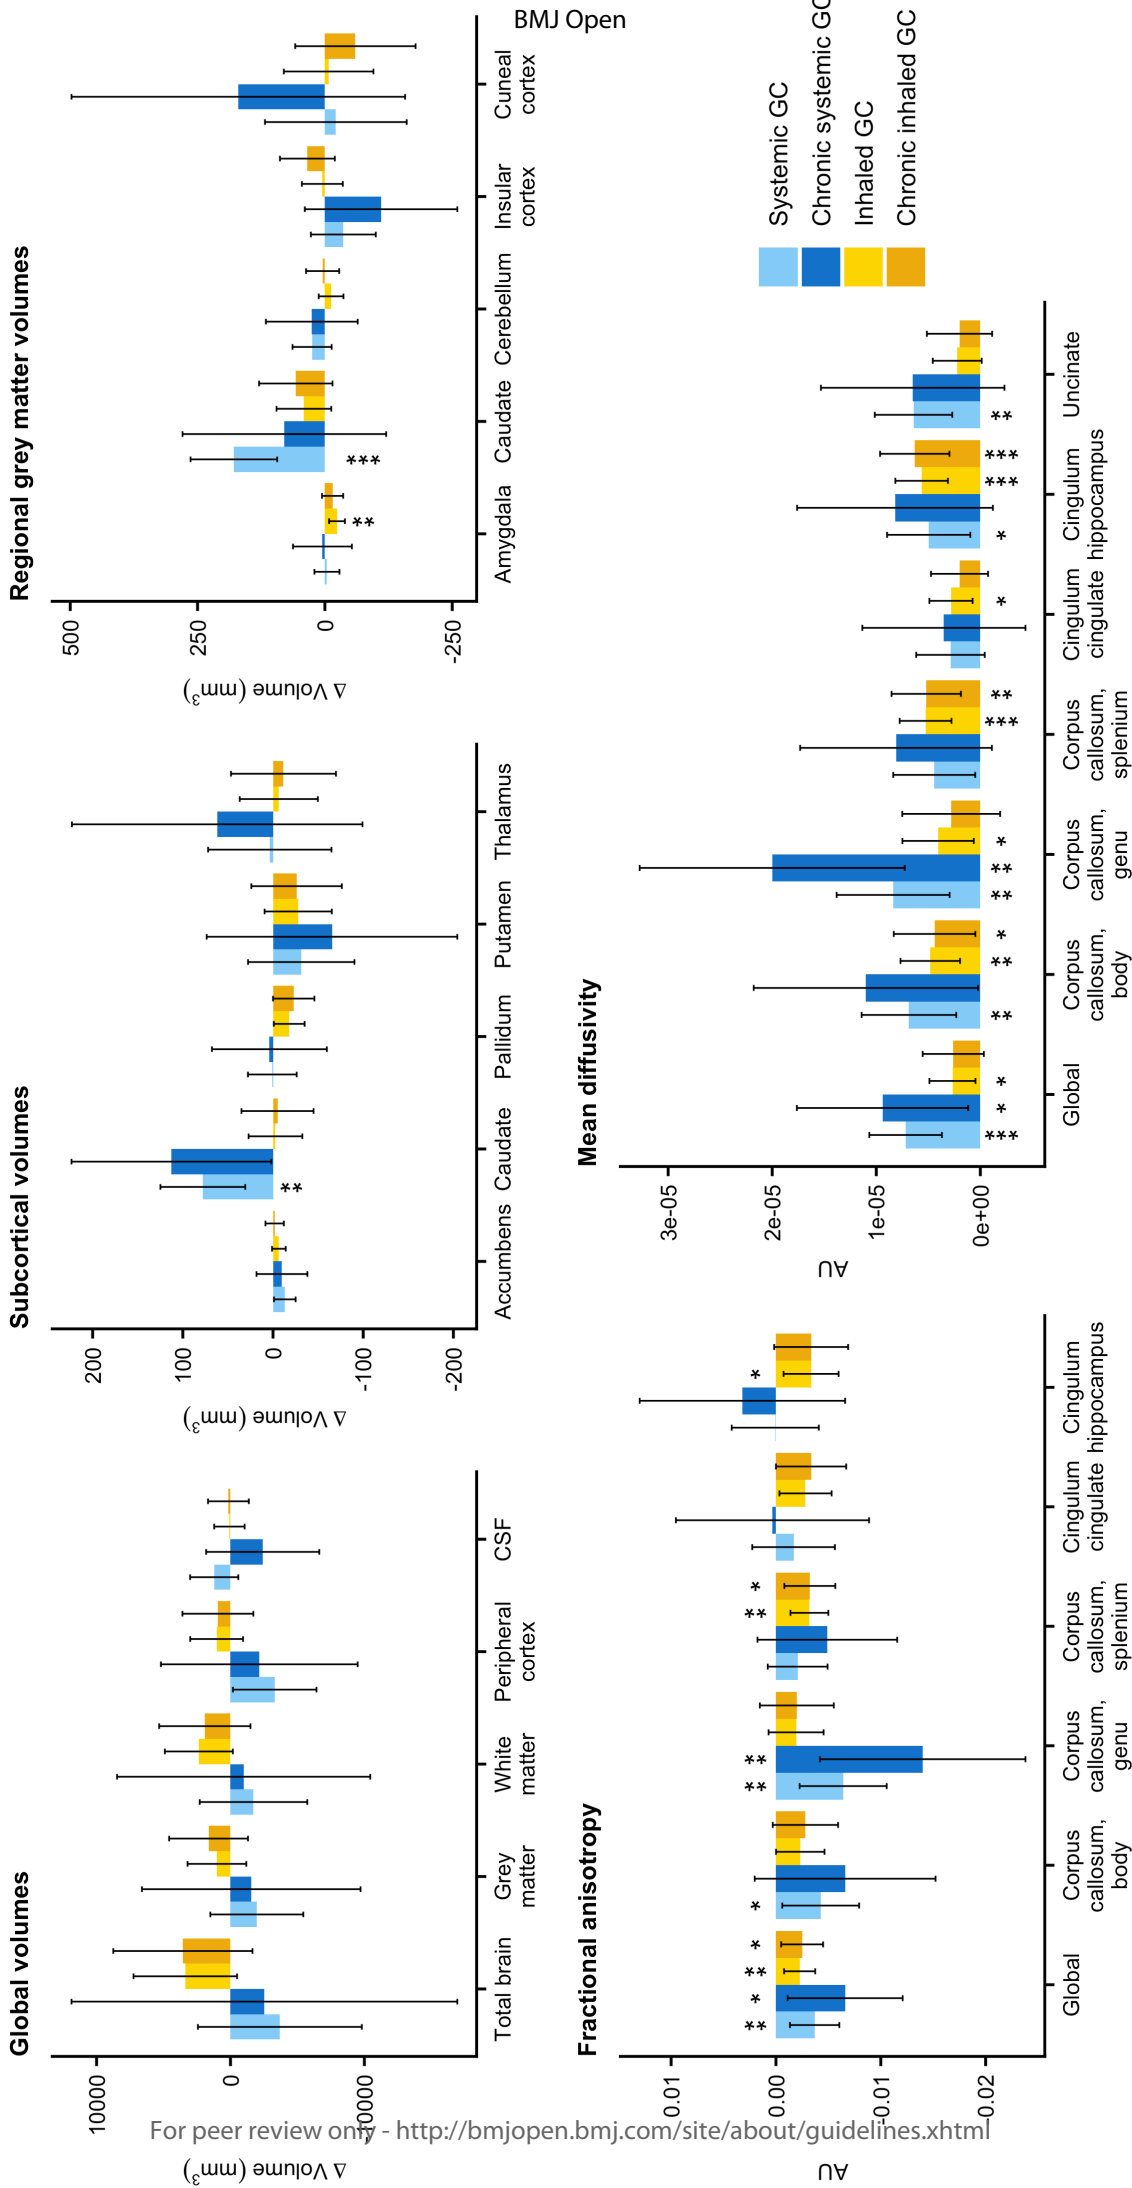

1  
2  
3 This file contains all UK Biobank codes used for the selection (inclusion/exclusion) of  
4 participants. Patients were included based on systemic or inhalation glucocorticoid (GC)  
5 use and availability of imaging parameters; and were excluded based on psychiatric,  
6 neurological or endocrinological comorbidity and use of psychotropic drugs. Moreover,  
7 this file lists all outcome variables used in the analyses presented in this study (imaging  
8 parameters, cognitive parameters, emotional parameters, and demographics and  
9 confounds)  
10  
11  
12  
13  
14  
15  
16  
17  
18  
19  
20  
21  
22  
23  
24  
25  
26  
27  
28  
29  
30  
31  
32  
33  
34  
35  
36  
37  
38  
39  
40  
41  
42  
43  
44  
45  
46  
47  
48  
49  
50  
51  
52  
53  
54  
55  
56  
57  
58  
59  
60

For peer review only

| Field ID | Code       | Description                           |
|----------|------------|---------------------------------------|
| 20003    | 1140874790 | betamethasone                         |
| 20003    | 1140874816 | dexamethasone                         |
| 20003    | 1140874954 | hydrocortistab 20mg tablet            |
| 20003    | 1140874956 | hydrocortone 10mg tablet              |
| 20003    | 1140874978 | medrone 2mg tablet                    |
| 20003    | 1140874976 | methylprednisolone                    |
| 20003    | 1140874950 | prednesol 5mg tablet                  |
| 20003    | 1140874930 | prednisolone                          |
| 20003    | 1141157402 | prednisolone product                  |
| 20003    | 1140868364 | prednisone                            |
| 20003    | 1140884704 | cortisone product                     |
| 20003    | 1140874896 | hydrocortisone                        |
| 20003    | 1140910424 | hc - hydrocortisone                   |
| 20003    | 1141157294 | hydrocortisone product                |
| 20003    | 1141173346 | cortisone                             |
| 20003    | 1140874944 | precortisyl 1mg tablet                |
| 20003    | 1140857532 | cortelan 25mg tablet                  |
| 20003    | 1140857534 | oradexon 500micrograms tablet         |
| 20003    | 1140868370 | decortisyl 5mg tablet                 |
| 20003    | 1140868426 | triamcinolone                         |
| 20003    | 1140868434 | ledercort 2mg tablet                  |
| 20003    | 1140851210 | cortenema 100mg/60ml enema            |
| 20003    | 1140874792 | betnelan 500mcg tablet                |
| 20003    | 1140874794 | betnesol 500mcg soluble tablet        |
| 20003    | 1140874810 | cortistab 5mg tablet                  |
| 20003    | 1140874814 | cortisyl 25mg tablet                  |
| 20003    | 1140874822 | decadron 500micrograms tablet         |
| 20003    | 1140874936 | deltacortril enteric 2.5mg e/c tablet |
| 20003    | 1140874940 | deltastab 1mg tablet                  |
| 20003    | 1140910634 | deltahydrocortisone                   |
| 20003    | 1140910484 | cortisol product                      |

| Field ID | Code       | Description                                                  |
|----------|------------|--------------------------------------------------------------|
| 20003    | 1140855466 | bextasol 100micrograms inhaler                               |
| 20003    | 1140881922 | becodisks 100micrograms disks+diskhaler                      |
| 20003    | 1140881938 | beclomethasone dipropionate+salbutamol                       |
| 20003    | 1141167594 | qvar 50 inhaler                                              |
| 20003    | 1141174512 | budesonide+eformoterol                                       |
| 20003    | 1141174520 | ymbicort 100/6 turbohaler                                    |
| 20003    | 1140862572 | budesonide                                                   |
| 20003    | 1140862574 | pulmicort ls 50micrograms inhaler                            |
| 20003    | 1140862584 | pulmicort ls 50micrograms spacer inhaler                     |
| 20003    | 1140862476 | beclazone 50 inhaler                                         |
| 20003    | 1140862380 | becloforte 250micrograms inhaler                             |
| 20003    | 1140862474 | aerobec 50mcg autohaler                                      |
| 20003    | 1140862382 | becotide 50 inhaler                                          |
| 20003    | 1140888098 | fluticasone                                                  |
| 20003    | 1141164086 | salmeterol+fluticasone propionate                            |
| 20003    | 1141176832 | seretide 50 evohaler                                         |
| 20003    | 1141176842 | dexsol 2mg/5ml oral solution                                 |
| 20003    | 1140864286 | flixtide 25micrograms inhaler                                |
| 20003    | 1141191818 | asmanex twisthaler 200mcg breath-actuated dry powder inhaler |
| 20003    | 1140884654 | beclomethasone                                               |
| 20003    | 1140909786 | beclometasone                                                |
| 20003    | 1141179072 | pulvinal beclomethasone diprop 100mcg breath-act dry pdr inh |

| Field ID | Description                                                          |
|----------|----------------------------------------------------------------------|
| 25010    | Volume of brain, grey+white matter                                   |
| 25008    | Volume of white matter                                               |
| 25006    | Volume of grey matter                                                |
| 25002    | Volume of peripheral cortical grey matter                            |
| 25004    | Volume of ventricular cerebrospinal fluid                            |
| 25888    | Volume of grey matter in Amygdala (left)                             |
| 25889    | Volume of grey matter in Amygdala (right)                            |
| 25880    | Volume of grey matter in Caudate (left)                              |
| 25881    | Volume of grey matter in Caudate (right)                             |
| 25838    | Volume of grey matter in Cingulate Gyrus, anterior division (left)   |
| 25839    | Volume of grey matter in Cingulate Gyrus, anterior division (right)  |
| 25840    | Volume of grey matter in Cingulate Gyrus, posterior division (left)  |
| 25841    | Volume of grey matter in Cingulate Gyrus, posterior division (right) |
| 25886    | Volume of grey matter in Hippocampus (left)                          |
| 25887    | Volume of grey matter in Hippocampus (right)                         |
| 25784    | Volume of grey matter in Insular Cortex (left)                       |
| 25785    | Volume of grey matter in Insular Cortex (right)                      |
| 25788    | Volume of grey matter in Middle Frontal Gyrus (left)                 |
| 25789    | Volume of grey matter in Middle Frontal Gyrus (right)                |
| 25844    | Volume of grey matter in Cuneal Cortex (left)                        |
| 25845    | Volume of grey matter in Cuneal Cortex (right)                       |
| 25842    | Volume of grey matter in Precuneous Cortex (left)                    |
| 25843    | Volume of grey matter in Precuneous Cortex (right)                   |
| 25900    | Volume of grey matter in Crus I Cerebellum (left)                    |
| 25902    | Volume of grey matter in Crus I Cerebellum (right)                   |
| 25901    | Volume of grey matter in Crus I Cerebellum (vermis)                  |
| 25903    | Volume of grey matter in Crus II Cerebellum (left)                   |
| 25905    | Volume of grey matter in Crus II Cerebellum (right)                  |
| 25904    | Volume of grey matter in Crus II Cerebellum (vermis)                 |
| 25893    | Volume of grey matter in I-IV Cerebellum (left)                      |
| 25894    | Volume of grey matter in I-IV Cerebellum (right)                     |
| 25915    | Volume of grey matter in IX Cerebellum (left)                        |
| 25917    | Volume of grey matter in IX Cerebellum (right)                       |
| 25916    | Volume of grey matter in IX Cerebellum (vermis)                      |
| 25895    | Volume of grey matter in V Cerebellum (left)                         |
| 25896    | Volume of grey matter in V Cerebellum (right)                        |
| 25897    | Volume of grey matter in VI Cerebellum (left)                        |
| 25899    | Volume of grey matter in VI Cerebellum (right)                       |
| 25898    | Volume of grey matter in VI Cerebellum (vermis)                      |
| 25909    | Volume of grey matter in VIIla Cerebellum (left)                     |
| 25911    | Volume of grey matter in VIIla Cerebellum (right)                    |
| 25910    | Volume of grey matter in VIIla Cerebellum (vermis)                   |
| 25912    | Volume of grey matter in VIIlb Cerebellum (left)                     |
| 25914    | Volume of grey matter in VIIlb Cerebellum (right)                    |
| 25913    | Volume of grey matter in VIIlb Cerebellum (vermis)                   |



|    |                                                                                                   |
|----|---------------------------------------------------------------------------------------------------|
| 1  |                                                                                                   |
| 2  | 25906 Volume of grey matter in VIIb Cerebellum (left)                                             |
| 3  | 25908 Volume of grey matter in VIIb Cerebellum (right)                                            |
| 4  | 25907 Volume of grey matter in VIIb Cerebellum (vermis)                                           |
| 5  |                                                                                                   |
| 6  | 25890 Volume of grey matter in Ventral Striatum (left)                                            |
| 7  | 25891 Volume of grey matter in Ventral Striatum (right)                                           |
| 8  |                                                                                                   |
| 9  | 25918 Volume of grey matter in X Cerebellum (left)                                                |
| 10 | 25919 Volume of grey matter in X Cerebellum (vermis)                                              |
| 11 | 25920 Volume of grey matter in X Cerebellum (right)                                               |
| 12 |                                                                                                   |
| 13 | 25023 Volume of accumbens (left)                                                                  |
| 14 | 25024 Volume of accumbens (right)                                                                 |
| 15 | 25021 Volume of amygdala (left)                                                                   |
| 16 | 25022 Volume of amygdala (right)                                                                  |
| 17 |                                                                                                   |
| 18 | 25013 Volume of caudate (left)                                                                    |
| 19 | 25014 Volume of caudate (right)                                                                   |
| 20 |                                                                                                   |
| 21 | 25019 Volume of hippocampus (left)                                                                |
| 22 | 25020 Volume of hippocampus (right)                                                               |
| 23 | 25017 Volume of pallidum (left)                                                                   |
| 24 | 25018 Volume of pallidum (right)                                                                  |
| 25 |                                                                                                   |
| 26 | 25015 Volume of putamen (left)                                                                    |
| 27 | 25016 Volume of putamen (right)                                                                   |
| 28 |                                                                                                   |
| 29 | 25011 Volume of thalamus (left)                                                                   |
| 30 | 25012 Volume of thalamus (right)                                                                  |
| 31 | 25059 Mean FA in body of corpus callosum on FA skeleton                                           |
| 32 | 25091 Mean FA in cingulum cingulate gyrus on FA skeleton (left)                                   |
| 33 | 25090 Mean FA in cingulum cingulate gyrus on FA skeleton (right)                                  |
| 34 |                                                                                                   |
| 35 | 25093 Mean FA in cingulum hippocampus on FA skeleton (left)                                       |
| 36 | 25092 Mean FA in cingulum hippocampus on FA skeleton (right)                                      |
| 37 |                                                                                                   |
| 38 | 25058 Mean FA in genu of corpus callosum on FA skeleton                                           |
| 39 | 25060 Mean FA in splenium of corpus callosum on FA skeleton                                       |
| 40 | 25101 Mean FA in uncinate fasciculus on FA skeleton (left)                                        |
| 41 | 25100 Mean FA in uncinate fasciculus on FA skeleton (right)                                       |
| 42 |                                                                                                   |
| 43 | 25107 Mean MD in body of corpus callosum on FA skeleton                                           |
| 44 | 25139 Mean MD in cingulum cingulate gyrus on FA skeleton (left)                                   |
| 45 | 25138 Mean MD in cingulum cingulate gyrus on FA skeleton (right)                                  |
| 46 |                                                                                                   |
| 47 | 25141 Mean MD in cingulum hippocampus on FA skeleton (left)                                       |
| 48 | 25140 Mean MD in cingulum hippocampus on FA skeleton (right)                                      |
| 49 |                                                                                                   |
| 50 | 25106 Mean MD in genu of corpus callosum on FA skeleton                                           |
| 51 | 25108 Mean MD in splenium of corpus callosum on FA skeleton                                       |
| 52 | 25149 Mean MD in uncinate fasciculus on FA skeleton (left)                                        |
| 53 | 25148 Mean MD in uncinate fasciculus on FA skeleton (right)                                       |
| 54 |                                                                                                   |
| 55 |                                                                                                   |
| 56 |                                                                                                   |
| 57 |                                                                                                   |
| 58 | For the calculation of the global FA and global MD values, all available mean FA and mean MD were |
| 59 |                                                                                                   |
| 60 |                                                                                                   |

| Field ID | Description |
|----------|-------------|
|----------|-------------|

|       |                                                          |
|-------|----------------------------------------------------------|
| 25079 | Mean FA in anterior corona radiata on FA skeleton (left) |
|-------|----------------------------------------------------------|

1  
2 25078 Mean FA in anterior corona radiata on FA skeleton (right)  
3 25073 Mean FA in anterior limb of internal capsule on FA skeleton (left)  
4 25072 Mean FA in anterior limb of internal capsule on FA skeleton (right)  
5  
6 25059 Mean FA in body of corpus callosum on FA skeleton  
7 25071 Mean FA in cerebral peduncle on FA skeleton (left)  
8 25070 Mean FA in cerebral peduncle on FA skeleton (right)  
9  
10 25091 Mean FA in cingulum cingulate gyrus on FA skeleton (left)  
11 25090 Mean FA in cingulum cingulate gyrus on FA skeleton (right)  
12 25093 Mean FA in cingulum hippocampus on FA skeleton (left)  
13 25092 Mean FA in cingulum hippocampus on FA skeleton (right)  
14  
15 25063 Mean FA in corticospinal tract on FA skeleton (left)  
16 25062 Mean FA in corticospinal tract on FA skeleton (right)  
17  
18 25089 Mean FA in external capsule on FA skeleton (left)  
19 25088 Mean FA in external capsule on FA skeleton (right)  
20 25095 Mean FA in fornix cres+stria terminalis on FA skeleton (left)  
21 25094 Mean FA in fornix cres+stria terminalis on FA skeleton (right)  
22  
23 25061 Mean FA in fornix on FA skeleton  
24 25058 Mean FA in genu of corpus callosum on FA skeleton  
25 25067 Mean FA in inferior cerebellar peduncle on FA skeleton (left)  
26 25066 Mean FA in inferior cerebellar peduncle on FA skeleton (right)  
27 25065 Mean FA in medial lemniscus on FA skeleton (left)  
28 25064 Mean FA in medial lemniscus on FA skeleton (right)  
29  
30 25056 Mean FA in middle cerebellar peduncle on FA skeleton  
31 25057 Mean FA in pontine crossing tract on FA skeleton  
32  
33 25083 Mean FA in posterior corona radiata on FA skeleton (left)  
34 25082 Mean FA in posterior corona radiata on FA skeleton (right)  
35 25075 Mean FA in posterior limb of internal capsule on FA skeleton (left)  
36 25074 Mean FA in posterior limb of internal capsule on FA skeleton (right)  
37 25085 Mean FA in posterior thalamic radiation on FA skeleton (left)  
38 25084 Mean FA in posterior thalamic radiation on FA skeleton (right)  
39 25077 Mean FA in retrolenticular part of internal capsule on FA skeleton (left)  
40 25076 Mean FA in retrolenticular part of internal capsule on FA skeleton (right)  
41 25087 Mean FA in sagittal stratum on FA skeleton (left)  
42 25086 Mean FA in sagittal stratum on FA skeleton (right)  
43 25060 Mean FA in splenium of corpus callosum on FA skeleton  
44 25069 Mean FA in superior cerebellar peduncle on FA skeleton (left)  
45 25068 Mean FA in superior cerebellar peduncle on FA skeleton (right)  
46 25081 Mean FA in superior corona radiata on FA skeleton (left)  
47 25080 Mean FA in superior corona radiata on FA skeleton (right)  
48 25099 Mean FA in superior fronto-occipital fasciculus on FA skeleton (left)  
49 25098 Mean FA in superior fronto-occipital fasciculus on FA skeleton (right)  
50 25097 Mean FA in superior longitudinal fasciculus on FA skeleton (left)  
51 25096 Mean FA in superior longitudinal fasciculus on FA skeleton (right)  
52 25103 Mean FA in tapetum on FA skeleton (left)  
53 25102 Mean FA in tapetum on FA skeleton (right)  
54 25101 Mean FA in uncinata fasciculus on FA skeleton (left)  
55  
56  
57  
58  
59  
60

1  
2 25100 Mean FA in uncinate fasciculus on FA skeleton (right)  
3 25127 Mean MD in anterior corona radiata on FA skeleton (left)  
4 25126 Mean MD in anterior corona radiata on FA skeleton (right)  
5 25121 Mean MD in anterior limb of internal capsule on FA skeleton (left)  
6 25120 Mean MD in anterior limb of internal capsule on FA skeleton (right)  
7 25107 Mean MD in body of corpus callosum on FA skeleton  
8 25119 Mean MD in cerebral peduncle on FA skeleton (left)  
9 25118 Mean MD in cerebral peduncle on FA skeleton (right)  
10 25139 Mean MD in cingulum cingulate gyrus on FA skeleton (left)  
11 25138 Mean MD in cingulum cingulate gyrus on FA skeleton (right)  
12 25141 Mean MD in cingulum hippocampus on FA skeleton (left)  
13 25140 Mean MD in cingulum hippocampus on FA skeleton (right)  
14 25111 Mean MD in corticospinal tract on FA skeleton (left)  
15 25110 Mean MD in corticospinal tract on FA skeleton (right)  
16 25137 Mean MD in external capsule on FA skeleton (left)  
17 25136 Mean MD in external capsule on FA skeleton (right)  
18 25143 Mean MD in fornix cres+stria terminalis on FA skeleton (left)  
19 25142 Mean MD in fornix cres+stria terminalis on FA skeleton (right)  
20 25109 Mean MD in fornix on FA skeleton  
21 25106 Mean MD in genu of corpus callosum on FA skeleton  
22 25115 Mean MD in inferior cerebellar peduncle on FA skeleton (left)  
23 25114 Mean MD in inferior cerebellar peduncle on FA skeleton (right)  
24 25113 Mean MD in medial lemniscus on FA skeleton (left)  
25 25112 Mean MD in medial lemniscus on FA skeleton (right)  
26 25104 Mean MD in middle cerebellar peduncle on FA skeleton  
27 25105 Mean MD in pontine crossing tract on FA skeleton  
28 25131 Mean MD in posterior corona radiata on FA skeleton (left)  
29 25130 Mean MD in posterior corona radiata on FA skeleton (right)  
30 25123 Mean MD in posterior limb of internal capsule on FA skeleton (left)  
31 25122 Mean MD in posterior limb of internal capsule on FA skeleton (right)  
32 25133 Mean MD in posterior thalamic radiation on FA skeleton (left)  
33 25132 Mean MD in posterior thalamic radiation on FA skeleton (right)  
34 25125 Mean MD in retrolenticular part of internal capsule on FA skeleton (left)  
35 25124 Mean MD in retrolenticular part of internal capsule on FA skeleton (right)  
36 25135 Mean MD in sagittal stratum on FA skeleton (left)  
37 25134 Mean MD in sagittal stratum on FA skeleton (right)  
38 25108 Mean MD in splenium of corpus callosum on FA skeleton  
39 25117 Mean MD in superior cerebellar peduncle on FA skeleton (left)  
40 25116 Mean MD in superior cerebellar peduncle on FA skeleton (right)  
41 25129 Mean MD in superior corona radiata on FA skeleton (left)  
42 25128 Mean MD in superior corona radiata on FA skeleton (right)  
43 25147 Mean MD in superior fronto-occipital fasciculus on FA skeleton (left)  
44 25146 Mean MD in superior fronto-occipital fasciculus on FA skeleton (right)  
45 25145 Mean MD in superior longitudinal fasciculus on FA skeleton (left)  
46 25144 Mean MD in superior longitudinal fasciculus on FA skeleton (right)  
47 25151 Mean MD in tapetum on FA skeleton (left)

- 1
- 2 25150 Mean MD in tapetum on FA skeleton (right)
- 3 25149 Mean MD in uncinata fasciculus on FA skeleton (left)
- 4 25148 Mean MD in uncinata fasciculus on FA skeleton (right)
- 5
- 6
- 7
- 8
- 9
- 10
- 11
- 12
- 13
- 14
- 15
- 16
- 17
- 18
- 19
- 20
- 21
- 22
- 23
- 24
- 25
- 26
- 27
- 28
- 29
- 30
- 31
- 32
- 33
- 34
- 35
- 36
- 37
- 38
- 39
- 40
- 41
- 42
- 43
- 44
- 45
- 46
- 47
- 48
- 49
- 50
- 51
- 52
- 53
- 54
- 55
- 56
- 57
- 58
- 59
- 60

For peer review only

1  
2  
3  
4  
5  
6  
7  
8  
9  
10  
11  
12  
13  
14  
15  
16  
17  
18  
19  
20  
21  
22  
23  
24  
25  
26  
27  
28  
29  
30  
31  
32  
33  
34  
35  
36  
37  
38  
39  
40  
41  
42  
43  
44  
45  
46  
47  
48  
49  
50  
51  
52  
53  
54  
55  
56  
57  
58  
59  
60

For peer review only

1  
2  
3  
4  
5  
6  
7  
8  
9  
10  
11  
12  
13  
14  
15  
16  
17  
18  
19  
20  
21  
22  
23  
24  
25  
26  
27  
28  
29  
30  
31  
32  
33  
34  
35  
36  
37  
38  
39  
40  
41  
42  
43  
44  
45  
46  
47  
48  
49  
50  
51  
52  
53  
54  
55  
56  
57  
58  
59  
60

For peer review only

averaged, respectively:

## Codes for the psychi

| Field ID | Code |
|----------|------|
| 20002    | 1081 |
| 20002    | 1082 |
| 20002    | 1083 |
| 20002    | 1086 |
| 20002    | 1240 |
| 20002    | 1243 |
| 20002    | 1244 |
| 20002    | 1245 |
| 20002    | 1246 |
| 20002    | 1247 |
| 20002    | 1248 |
| 20002    | 1249 |
| 20002    | 1250 |
| 20002    | 1251 |
| 20002    | 1252 |
| 20002    | 1254 |
| 20002    | 1255 |
| 20002    | 1256 |
| 20002    | 1257 |
| 20002    | 1258 |
| 20002    | 1259 |
| 20002    | 1260 |
| 20002    | 1261 |
| 20002    | 1262 |
| 20002    | 1263 |
| 20002    | 1264 |
| 20002    | 1265 |
| 20002    | 1266 |
| 20002    | 1267 |
| 20002    | 1289 |
| 20002    | 1394 |
| 20002    | 1397 |
| 20002    | 1408 |
| 20002    | 1409 |
| 20002    | 1410 |
| 20002    | 1425 |
| 20002    | 1433 |
| 20002    | 1436 |
| 20002    | 1437 |
| 20002    | 1469 |
| 20002    | 1470 |
| 20002    | 1491 |

|    |            |      |
|----|------------|------|
| 1  |            |      |
| 2  | 20002      | 1531 |
| 3  | 20002      | 1659 |
| 4  | 20001      | 1031 |
| 5  | 20001      | 1032 |
| 6  | 20001      | 1033 |
| 7  | 20001      | 1033 |
| 8  | 41270 C700 |      |
| 9  | 41270 C701 |      |
| 10 | 41270 C709 |      |
| 11 | 41270 C710 |      |
| 12 | 41270 C711 |      |
| 13 | 41270 C712 |      |
| 14 | 41270 C713 |      |
| 15 | 41270 C714 |      |
| 16 | 41270 C715 |      |
| 17 | 41270 C716 |      |
| 18 | 41270 C717 |      |
| 19 | 41270 C718 |      |
| 20 | 41270 C719 |      |
| 21 | 41270 C720 |      |
| 22 | 41270 C721 |      |
| 23 | 41270 C722 |      |
| 24 | 41270 C723 |      |
| 25 | 41270 C724 |      |
| 26 | 41270 C725 |      |
| 27 | 41270 C728 |      |
| 28 | 41270 C729 |      |
| 29 | 41270 F000 |      |
| 30 | 41270 F001 |      |
| 31 | 41270 F002 |      |
| 32 | 41270 F009 |      |
| 33 | 41270 F010 |      |
| 34 | 41270 F011 |      |
| 35 | 41270 F012 |      |
| 36 | 41270 F013 |      |
| 37 | 41270 F018 |      |
| 38 | 41270 F019 |      |
| 39 | 41270 F020 |      |
| 40 | 41270 F021 |      |
| 41 | 41270 F022 |      |
| 42 | 41270 F023 |      |
| 43 | 41270 F024 |      |
| 44 | 41270 F028 |      |
| 45 | 41270 F03  |      |
| 46 | 41270 F04  |      |
| 47 | 41270 F051 |      |
| 48 | 41270 F060 |      |
| 49 |            |      |
| 50 |            |      |
| 51 |            |      |
| 52 |            |      |
| 53 |            |      |
| 54 |            |      |
| 55 |            |      |
| 56 |            |      |
| 57 |            |      |
| 58 |            |      |
| 59 |            |      |
| 60 |            |      |



1  
2 41270 F061  
3 41270 F062  
4 41270 F065  
5 41270 F066  
6 41270 F067  
7 41270 F068  
8 41270 F069  
9 41270 F070  
10 41270 F071  
11 41270 F072  
12 41270 F078  
13 41270 F079  
14 41270 F09  
15 41270 F100  
16 41270 F101  
17 41270 F102  
18 41270 F103  
19 41270 F104  
20 41270 F105  
21 41270 F106  
22 41270 F107  
23 41270 F108  
24 41270 F109  
25 41270 F110  
26 41270 F111  
27 41270 F112  
28 41270 F113  
29 41270 F114  
30 41270 F115  
31 41270 F117  
32 41270 F119  
33 41270 F120  
34 41270 F121  
35 41270 F122  
36 41270 F123  
37 41270 F125  
38 41270 F128  
39 41270 F129  
40 41270 F130  
41 41270 F131  
42 41270 F132  
43 41270 F133  
44 41270 F134  
45 41270 F139  
46 41270 F140  
47 41270 F141  
48  
49  
50  
51  
52  
53  
54  
55  
56  
57  
58  
59  
60

For peer review only

1  
2 41270 F142  
3 41270 F145  
4 41270 F149  
5  
6 41270 F150  
7 41270 F151  
8 41270 F152  
9  
10 41270 F153  
11 41270 F155  
12 41270 F158  
13  
14 41270 F159  
15 41270 F161  
16 41270 F162  
17  
18 41270 F163  
19 41270 F165  
20 41270 F167  
21 41270 F168  
22  
23 41270 F169  
24 41270 F170  
25  
26 41270 F171  
27 41270 F172  
28 41270 F173  
29  
30 41270 F174  
31 41270 F177  
32 41270 F179  
33  
34 41270 F181  
35 41270 F182  
36 41270 F183  
37 41270 F185  
38  
39 41270 F189  
40 41270 F190  
41 41270 F191  
42  
43 41270 F192  
44 41270 F193  
45 41270 F194  
46  
47 41270 F195  
48 41270 F198  
49 41270 F199  
50  
51 41270 F200  
52 41270 F201  
53 41270 F202  
54 41270 F203  
55  
56 41270 F204  
57 41270 F205  
58 41270 F206  
59  
60 41270 F208  
41270 F209

For peer review only

1  
2 41270 F21  
3 41270 F220  
4 41270 F228  
5 41270 F229  
6 41270 F230  
7 41270 F231  
8 41270 F232  
9 41270 F233  
10 41270 F238  
11 41270 F239  
12 41270 F24  
13 41270 F250  
14 41270 F251  
15 41270 F252  
16 41270 F258  
17 41270 F259  
18 41270 F28  
19 41270 F29  
20 41270 F431  
21 41270 F432  
22 41270 F438  
23 41270 F439  
24 41270 F440  
25 41270 F441  
26 41270 F442  
27 41270 F443  
28 41270 F444  
29 41270 F445  
30 41270 F446  
31 41270 F447  
32 41270 F448  
33 41270 F449  
34 41270 F450  
35 41270 F451  
36 41270 F452  
37 41270 F453  
38 41270 F454  
39 41270 F458  
40 41270 F459  
41 41270 F480  
42 41270 F481  
43 41270 F488  
44 41270 F489  
45 41270 F500  
46 41270 F501  
47 41270 F502

For peer review only

1  
2 41270 F505  
3 41270 F508  
4 41270 F509  
5  
6 41270 F530  
7 41270 F531  
8 41270 F538  
9  
10 41270 F539  
11 41270 F54  
12 41270 F55  
13  
14 41270 F59  
15 41270 F600  
16 41270 F601  
17  
18 41270 F602  
19 41270 F603  
20 41270 F604  
21 41270 F605  
22 41270 F606  
23 41270 F607  
24 41270 F608  
25 41270 F609  
26 41270 F61  
27 41270 F620  
28 41270 F621  
29 41270 F628  
30 41270 F629  
31 41270 F630  
32 41270 F631  
33 41270 F632  
34 41270 F633  
35 41270 F638  
36 41270 F639  
37 41270 F680  
38 41270 F681  
39 41270 F688  
40 41270 F69  
41 41270 F700  
42 41270 F701  
43 41270 F708  
44 41270 F709  
45 41270 F711  
46 41270 F719  
47 41270 F729  
48 41270 F780  
49 41270 F789  
50 41270 F790  
51 41270 F798  
52  
53  
54  
55  
56  
57  
58  
59  
60

For peer review only

1  
2 41270 F799  
3 41270 F800  
4 41270 F801  
5  
6 41270 F802  
7 41270 F803  
8 41270 F809  
9  
10 41270 F810  
11 41270 F812  
12 41270 F819  
13  
14 41270 F82  
15 41270 F83  
16 41270 F840  
17 41270 F841  
18 41270 F843  
19 41270 F844  
20 41270 F845  
21 41270 F849  
22 41270 F89  
23 41270 F900  
24 41270 F909  
25 41270 F911  
26 41270 F918  
27 41270 F919  
28 41270 F920  
29 41270 F929  
30 41270 F930  
31 41270 F940  
32 41270 F941  
33 41270 F950  
34 41270 F951  
35 41270 F952  
36 41270 F958  
37 41270 F959  
38 41270 F981  
39 41270 F985  
40 41270 F986  
41 41270 F988  
42 41270 F99  
43 41270 G000  
44 41270 G001  
45 41270 G002  
46 41270 G003  
47 41270 G008  
48 41270 G009  
49 41270 G01  
50 41270 G020  
51  
52  
53  
54  
55  
56  
57  
58  
59  
60

For peer review only

1  
2 41270 G021  
3 41270 G030  
4 41270 G031  
5 41270 G032  
6 41270 G038  
7 41270 G039  
8 41270 G040  
9 41270 G042  
10 41270 G048  
11 41270 G049  
12 41270 G050  
13 41270 G051  
14 41270 G052  
15 41270 G058  
16 41270 G060  
17 41270 G061  
18 41270 G062  
19 41270 G07  
20 41270 G08  
21 41270 G09  
22 41270 G10  
23 41270 G110  
24 41270 G111  
25 41270 G112  
26 41270 G113  
27 41270 G114  
28 41270 G118  
29 41270 G119  
30 41270 G120  
31 41270 G121  
32 41270 G122  
33 41270 G128  
34 41270 G129  
35 41270 G130  
36 41270 G131  
37 41270 G138  
38 41270 G14  
39 41270 G20  
40 41270 G210  
41 41270 G211  
42 41270 G212  
43 41270 G213  
44 41270 G214  
45 41270 G218  
46 41270 G219  
47 41270 G22

For peer review only

1  
2 41270 G230  
3 41270 G231  
4 41270 G232  
5 41270 G233  
6 41270 G238  
7 41270 G239  
8 41270 G240  
9 41270 G241  
10 41270 G242  
11 41270 G243  
12 41270 G244  
13 41270 G245  
14 41270 G248  
15 41270 G249  
16 41270 G250  
17 41270 G251  
18 41270 G252  
19 41270 G253  
20 41270 G254  
21 41270 G255  
22 41270 G258  
23 41270 G259  
24 41270 G300  
25 41270 G301  
26 41270 G308  
27 41270 G309  
28 41270 G310  
29 41270 G311  
30 41270 G312  
31 41270 G318  
32 41270 G319  
33 41270 G320  
34 41270 G328  
35 41270 G35  
36 41270 G360  
37 41270 G368  
38 41270 G369  
39 41270 G370  
40 41270 G371  
41 41270 G372  
42 41270 G373  
43 41270 G374  
44 41270 G378  
45 41270 G378  
46 41270 G379  
47 41270 G400  
48 41270 G401

For peer review only

1  
2 41270 G402  
3 41270 G403  
4 41270 G404  
5 41270 G405  
6 41270 G406  
7 41270 G407  
8 41270 G408  
9 41270 G409  
10 41270 G410  
11 41270 G411  
12 41270 G412  
13 41270 G418  
14 41270 G419  
15 41270 G430  
16 41270 G431  
17 41270 G432  
18 41270 G433  
19 41270 G438  
20 41270 G439  
21 41270 G440  
22 41270 G441  
23 41270 G442  
24 41270 G443  
25 41270 G444  
26 41270 G448  
27 41270 G450  
28 41270 G451  
29 41270 G452  
30 41270 G453  
31 41270 G454  
32 41270 G458  
33 41270 G459  
34 41270 G460  
35 41270 G461  
36 41270 G462  
37 41270 G463  
38 41270 G464  
39 41270 G465  
40 41270 G466  
41 41270 G467  
42 41270 G468  
43 41270 G474  
44 41270 G500  
45 41270 G501  
46 41270 G508  
47 41270 G509  
48  
49  
50  
51  
52  
53  
54  
55  
56  
57  
58  
59  
60

For peer review only



1  
2 41270 G510  
3 41270 G511  
4 41270 G512  
5 41270 G513  
6 41270 G514  
7 41270 G518  
8 41270 G519  
9 41270 G520  
10 41270 G521  
11 41270 G522  
12 41270 G523  
13 41270 G527  
14 41270 G528  
15 41270 G529  
16 41270 G530  
17 41270 G531  
18 41270 G532  
19 41270 G533  
20 41270 G538  
21 41270 G540  
22 41270 G541  
23 41270 G542  
24 41270 G543  
25 41270 G544  
26 41270 G545  
27 41270 G546  
28 41270 G547  
29 41270 G548  
30 41270 G549  
31 41270 G550  
32 41270 G551  
33 41270 G552  
34 41270 G553  
35 41270 G558  
36 41270 G560  
37 41270 G561  
38 41270 G562  
39 41270 G563  
40 41270 G564  
41 41270 G568  
42 41270 G569  
43 41270 G570  
44 41270 G571  
45 41270 G572  
46 41270 G573  
47 41270 G574  
48  
49  
50  
51  
52  
53  
54  
55  
56  
57  
58  
59  
60

For peer review only

1  
2 41270 G575  
3 41270 G576  
4 41270 G578  
5  
6 41270 G579  
7 41270 G580  
8 41270 G587  
9  
10 41270 G588  
11 41270 G589  
12 41270 G590  
13  
14 41270 G598  
15 41270 G600  
16 41270 G602  
17  
18 41270 G603  
19 41270 G608  
20 41270 G609  
21  
22 41270 G610  
23 41270 G611  
24 41270 G618  
25  
26 41270 G619  
27 41270 G620  
28 41270 G621  
29  
30 41270 G622  
31 41270 G628  
32 41270 G629  
33  
34 41270 G630  
35 41270 G631  
36 41270 G632  
37 41270 G633  
38  
39 41270 G634  
40 41270 G635  
41 41270 G636  
42  
43 41270 G638  
44 41270 G64  
45 41270 G700  
46 41270 G702  
47  
48 41270 G708  
49 41270 G709  
50  
51 41270 G710  
52 41270 G711  
53 41270 G712  
54  
55 41270 G713  
56 41270 G718  
57 41270 G719  
58 41270 G720  
59  
60 41270 G721  
41270 G722

For peer review only

1  
2 41270 G723  
3 41270 G724  
4 41270 G728  
5 41270 G729  
6 41270 G730  
7 41270 G731  
8 41270 G735  
9 41270 G736  
10 41270 G737  
11 41270 G800  
12 41270 G801  
13 41270 G802  
14 41270 G803  
15 41270 G808  
16 41270 G809  
17 41270 G810  
18 41270 G811  
19 41270 G819  
20 41270 G820  
21 41270 G821  
22 41270 G822  
23 41270 G823  
24 41270 G824  
25 41270 G825  
26 41270 G830  
27 41270 G831  
28 41270 G832  
29 41270 G833  
30 41270 G834  
31 41270 G835  
32 41270 G838  
33 41270 G839  
34 41270 G900  
35 41270 G901  
36 41270 G902  
37 41270 G903  
38 41270 G904  
39 41270 G908  
40 41270 G909  
41 41270 G910  
42 41270 G911  
43 41270 G912  
44 41270 G913  
45 41270 G918  
46 41270 G919  
47 41270 G92

For peer review only

1  
2 41270 G930  
3 41270 G931  
4 41270 G932  
5 41270 G933  
6 41270 G934  
7 41270 G935  
8 41270 G936  
9 41270 G937  
10 41270 G938  
11 41270 G939  
12 41270 G940  
13 41270 G941  
14 41270 G942  
15 41270 G948  
16 41270 G950  
17 41270 G951  
18 41270 G952  
19 41270 G958  
20 41270 G959  
21 41270 G960  
22 41270 G961  
23 41270 G968  
24 41270 G969  
25 41270 G970  
26 41270 G971  
27 41270 G972  
28 41270 G978  
29 41270 G979  
30 41270 G98  
31 41270 G990  
32 41270 G991  
33 41270 G992  
34 41270 G998  
35 41270 S0200  
36 41270 S0201  
37 41270 S0210  
38 41270 S0211  
39 41270 S0270  
40 41270 S0271  
41 41270 S0280  
42 41270 S9281  
43 41270 S0290  
44 41270 S0291  
45 41270 S040  
46 41270 S041  
47 41270 S042

For peer review only

- 1
- 2 41270 S043
- 3 41270 S045
- 4 41270 S048
- 5
- 6 41270 S049
- 7 41270 S0600
- 8 41270 S0601
- 9
- 10 41270 S0610
- 11 41270 S0620
- 12 41270 S0621
- 13
- 14 41270 S0630
- 15 41270 S0631
- 16 41270 S0640
- 17
- 18 41270 S0641
- 19 41270 S0650
- 20 41270 S0651
- 21
- 22 41270 S0660
- 23 41270 S0661
- 24 41270 S0670
- 25
- 26 41270 S0680
- 27 41270 S0681
- 28 41270 S0690
- 29
- 30 41270 S0691
- 31 41270 S097
- 32 41270 S099
- 33
- 34 41270 T901
- 35 41270 T902
- 36 41270 T903
- 37 41270 T904
- 38
- 39 41270 T908
- 40 41270 T909
- 41 41270 T913
- 42
- 43
- 44
- 45
- 46
- 47
- 48
- 49
- 50
- 51
- 52
- 53
- 54
- 55
- 56
- 57
- 58
- 59
- 60

For peer review only

## atric and neurological conditions used as exclusion criteria

### Description

stroke  
transient ischaemic attack (tia)  
subdural haemorrhage/haematoma  
subarachnoid haemorrhage  
neurological injury/trauma  
psychological/psychiatric problem  
infection of nervous system  
brain abscess/intracranial abscess  
encephalitis  
meningitis  
spinal abscess  
cranial nerve problem/palsy  
bell's palsy/facial nerve palsy  
spinal cord disorder  
paraplegia  
peripheral nerve disorder  
peripheral neuropathy  
acute infective polyneuritis/guillain-barre syndrome  
trapped nerve/compressed nerve  
chronic/degenerative neurological problem  
motor neuron disease  
myasthenia gravis  
multiple sclerosis  
Parkinson's disease  
dementia/Alzheimer's/cognitive impairment  
epilepsy  
migraine  
head injury  
spinal injury  
schizophrenia  
peripheral nerve injury  
other demyelinating disease (not multiple sclerosis)  
alcohol dependency  
opioid dependency  
other substance abuse/dependency  
cerebral aneurysm  
cerebral palsy  
headaches (not migraine)  
myasthenia gravis  
post-traumatic stress disorder  
anorexia/bulimia/other eating disorder  
brain haemorrhage

1 post-natal depression  
2  
3 meningioma / benign meningeal tumour  
4 meningeal cancer / malignant meningioma  
5  
6 brain cancer / primary malignant brain tumour  
7 spinal cord or cranial nerve cancer  
8 C70.0 Cerebral meninges  
9  
10 C70.1 Spinal meninges  
11 C70.9 Meninges, unspecified  
12 C71.0 Cerebrum, except lobes and ventricles  
13 C71.1 Frontal lobe  
14 C71.2 Temporal lobe  
15 C71.3 Parietal lobe  
16 C71.4 Occipital lobe  
17 C71.5 Cerebral ventricle  
18 C71.6 Cerebellum  
19 C71.7 Brain stem  
20 C71.8 Overlapping lesion of brain  
21 C71.9 Brain, unspecified  
22 C72.0 Spinal cord  
23 C72.1 Cauda equina  
24 C72.2 Olfactory nerve  
25 C72.3 Optic nerve  
26 C72.4 Acoustic nerve  
27 C72.5 Other and unspecified cranial nerves  
28 C72.8 Overlapping lesion of brain and other parts of central nervous system  
29 C72.9 Central nervous system, unspecified  
30 F00.0 Dementia in Alzheimer's disease with early onset  
31 F00.1 Dementia in Alzheimer's disease with late onset  
32 F00.2 Dementia in Alzheimer's disease, atypical or mixed type  
33 F00.9 Dementia in Alzheimer's disease, unspecified  
34 F01.0 Vascular dementia of acute onset  
35 F01.1 Multi-infarct dementia  
36 F01.2 Subcortical vascular dementia  
37 F01.3 Mixed cortical and subcortical vascular dementia  
38 F01.8 Other vascular dementia  
39 F01.9 Vascular dementia, unspecified  
40 F02.0 Dementia in Pick's disease  
41 F02.1 Dementia in Creutzfeldt-Jakob disease  
42 F02.2 Dementia in Huntington's disease  
43 F02.3 Dementia in Parkinson's disease  
44 F02.4 Dementia in human immunodeficiency virus [HIV] disease  
45 F02.8 Dementia in other specified diseases classified elsewhere  
46 F03 Unspecified dementia  
47 F04 Organic amnesic syndrome, not induced by alcohol and other psychoactive substances  
48 F05.1 Delirium superimposed on dementia  
49 F06.0 Organic hallucinosis  
50  
51  
52  
53  
54  
55  
56  
57  
58  
59  
60

- 1 F06.1 Organic catatonic disorder
- 2 F06.2 Organic delusional [schizophrenia-like] disorder
- 3 F06.5 Organic dissociative disorder
- 4 F06.6 Organic emotionally labile [asthenic] disorder
- 5 F06.7 Mild cognitive disorder
- 6 F06.8 Other specified mental disorders due to brain damage and dysfunction and to physical disease
- 7 F06.9 Unspecified mental disorder due to brain damage and dysfunction and to physical disease
- 8 F07.0 Organic personality disorder
- 9 F07.1 Postencephalitic syndrome
- 10 F07.2 Postconcussional syndrome
- 11 F07.8 Other organic personality and behavioural disorders due to brain disease, damage and dysfunction
- 12 F07.9 Unspecified organic personality and behavioural disorder due to brain disease, damage and dysfunction
- 13 F09 Unspecified organic or symptomatic mental disorder
- 14 F10.0 Acute intoxication
- 15 F10.1 Harmful use
- 16 F10.2 Dependence syndrome
- 17 F10.3 Withdrawal state
- 18 F10.4 Withdrawal state with delirium
- 19 F10.5 Psychotic disorder
- 20 F10.6 Amnesic syndrome
- 21 F10.7 Residual and late-onset psychotic disorder
- 22 F10.8 Other mental and behavioural disorders
- 23 F10.9 Unspecified mental and behavioural disorder
- 24 F11.0 Acute intoxication
- 25 F11.1 Harmful use
- 26 F11.2 Dependence syndrome
- 27 F11.3 Withdrawal state
- 28 F11.4 Withdrawal state with delirium
- 29 F11.5 Psychotic disorder
- 30 F11.7 Residual and late-onset psychotic disorder
- 31 F11.9 Unspecified mental and behavioural disorder
- 32 F12.0 Acute intoxication
- 33 F12.1 Harmful use
- 34 F12.2 Dependence syndrome
- 35 F12.3 Withdrawal state
- 36 F12.5 Psychotic disorder
- 37 F12.8 Other mental and behavioural disorders
- 38 F12.9 Unspecified mental and behavioural disorder
- 39 F13.0 Acute intoxication
- 40 F13.1 Harmful use
- 41 F13.2 Dependence syndrome
- 42 F13.3 Withdrawal state
- 43 F13.4 Withdrawal state with delirium
- 44 F13.9 Unspecified mental and behavioural disorder
- 45 F14.0 Acute intoxication
- 46 F14.1 Harmful use



- 1 F14.2 Dependence syndrome
- 2 F14.5 Psychotic disorder
- 3 F14.9 Unspecified mental and behavioural disorder
- 4 F15.0 Acute intoxication
- 5 F15.1 Harmful use
- 6 F15.2 Dependence syndrome
- 7 F15.3 Withdrawal state
- 8 F15.5 Psychotic disorder
- 9 F15.8 Other mental and behavioural disorders
- 10 F15.9 Unspecified mental and behavioural disorder
- 11 F16.1 Harmful use
- 12 F16.2 Dependence syndrome
- 13 F16.3 Withdrawal state
- 14 F16.5 Psychotic disorder
- 15 F16.7 Residual and late-onset psychotic disorder
- 16 F16.8 Other mental and behavioural disorders
- 17 F16.9 Unspecified mental and behavioural disorder
- 18 F17.0 Acute intoxication
- 19 F17.1 Harmful use
- 20 F17.2 Dependence syndrome
- 21 F17.3 Withdrawal state
- 22 F17.4 Withdrawal state with delirium
- 23 F17.7 Residual and late-onset psychotic disorder
- 24 F17.9 Unspecified mental and behavioural disorder
- 25 F18.1 Harmful use
- 26 F18.2 Dependence syndrome
- 27 F18.3 Withdrawal state
- 28 F18.5 Psychotic disorder
- 29 F18.9 Unspecified mental and behavioural disorder
- 30 F19.0 Acute intoxication
- 31 F19.1 Harmful use
- 32 F19.2 Dependence syndrome
- 33 F19.3 Withdrawal state
- 34 F19.4 Withdrawal state with delirium
- 35 F19.5 Psychotic disorder
- 36 F19.8 Other mental and behavioural disorders
- 37 F19.9 Unspecified mental and behavioural disorder
- 38 F20.0 Paranoid schizophrenia
- 39 F20.1 Hebephrenic schizophrenia
- 40 F20.2 Catatonic schizophrenia
- 41 F20.3 Undifferentiated schizophrenia
- 42 F20.4 Postschizophrenic depression
- 43 F20.5 Residual schizophrenia
- 44 F20.6 Simple schizophrenia
- 45 F20.8 Other schizophrenia
- 46 F20.9 Schizophrenia, unspecified

1 F21 Schizotypal disorder  
2  
3 F22.0 Delusional disorder  
4  
5 F22.8 Other persistent delusional disorders  
6  
7 F22.9 Persistent delusional disorder, unspecified  
8  
9 F23.0 Acute polymorphic psychotic disorder without symptoms of schizophrenia  
10  
11 F23.1 Acute polymorphic psychotic disorder with symptoms of schizophrenia  
12  
13 F23.2 Acute schizophrenia-like psychotic disorder  
14  
15 F23.3 Other acute predominantly delusional psychotic disorders  
16  
17 F23.8 Other acute and transient psychotic disorders  
18  
19 F23.9 Acute and transient psychotic disorder, unspecified  
20  
21 F24 Induced delusional disorder  
22  
23 F25.0 Schizoaffective disorder, manic type  
24  
25 F25.1 Schizoaffective disorder, depressive type  
26  
27 F25.2 Schizoaffective disorder, mixed type  
28  
29 F25.8 Other schizoaffective disorders  
30  
31 F25.9 Schizoaffective disorder, unspecified  
32  
33 F28 Other nonorganic psychotic disorders  
34  
35 F29 Unspecified nonorganic psychosis  
36  
37 F43.1 Posttraumatic stress disorder  
38  
39 F43.2 Adjustment disorders  
40  
41 F43.8 Other reactions to severe stress  
42  
43 F43.9 Reaction to severe stress, unspecified  
44  
45 F44.0 Dissociative amnesia  
46  
47 F44.1 Dissociative fugue  
48  
49 F44.2 Dissociative stupor  
50  
51 F44.3 Trance and possession disorders  
52  
53 F44.4 Dissociative motor disorders  
54  
55 F44.5 Dissociative convulsions  
56  
57 F44.6 Dissociative anaesthesia and sensory loss  
58  
59 F44.7 Mixed dissociative [conversion] disorders  
60  
61 F44.8 Other dissociative [conversion] disorders  
62  
63 F44.9 Dissociative [conversion] disorder, unspecified  
64  
65 F45.0 Somatisation disorder  
66  
67 F45.1 Undifferentiated somatoform disorder  
68  
69 F45.2 Hypochondriacal disorder  
70  
71 F45.3 Somatoform autonomic dysfunction  
72  
73 F45.4 Persistent somatoform pain disorder  
74  
75 F45.8 Other somatoform disorders  
76  
77 F45.9 Somatoform disorder, unspecified  
78  
79 F48.0 Neurasthenia  
80  
81 F48.1 Depersonalisation-derealisation syndrome  
82  
83 F48.8 Other specified neurotic disorders  
84  
85 F48.9 Neurotic disorder, unspecified  
86  
87 F50.0 Anorexia nervosa  
88  
89 F50.1 Atypical anorexia nervosa  
90  
91 F50.2 Bulimia nervosa

- 1 F50.5 Vomiting associated with other psychological disturbances  
2  
3 F50.8 Other eating disorders  
4  
5 F50.9 Eating disorder, unspecified  
6  
7 F53.0 Mild mental and behavioural disorders associated with the puerperium, not elsewhere classified  
8  
9 F53.1 Severe mental and behavioural disorders associated with the puerperium, not elsewhere classified  
10  
11 F53.8 Other mental and behavioural disorders associated with the puerperium, not elsewhere classified  
12  
13 F53.9 Puerperal mental disorder, unspecified  
14  
15 F54 Psychological and behavioural factors associated with disorders or diseases classified elsewhere  
16  
17 F55 Abuse of non-dependence-producing substances  
18  
19 F59 Unspecified behavioural syndromes associated with physiological disturbances and physical factors  
20  
21 F60.0 Paranoid personality disorder  
22  
23 F60.1 Schizoid personality disorder  
24  
25 F60.2 Dissocial personality disorder  
26  
27 F60.3 Emotionally unstable personality disorder  
28  
29 F60.4 Histrionic personality disorder  
30  
31 F60.5 Anankastic personality disorder  
32  
33 F60.6 Anxious [avoidant] personality disorder  
34  
35 F60.7 Dependent personality disorder  
36  
37 F60.8 Other specific personality disorders  
38  
39 F60.9 Personality disorder, unspecified  
40  
41 F61 Mixed and other personality disorders  
42  
43 F62.0 Enduring personality change after catastrophic experience  
44  
45 F62.1 Enduring personality change after psychiatric illness  
46  
47 F62.8 Other enduring personality changes  
48  
49 F62.9 Enduring personality change, unspecified  
50  
51 F63.0 Pathological gambling  
52  
53 F63.1 Pathological fire-setting [pyromania]  
54  
55 F63.2 Pathological stealing [kleptomania]  
56  
57 F63.3 Trichotillomania  
58  
59 F63.8 Other habit and impulse disorders  
60  
61 F63.9 Habit and impulse disorder, unspecified  
62  
63 F68.0 Elaboration of physical symptoms for psychological reasons  
64  
65 F68.1 Intentional production or feigning of symptoms or disabilities, either physical or psychological [factitious disorder]  
66  
67 F68.8 Other specified disorders of adult personality and behaviour  
68  
69 F69 Unspecified disorder of adult personality and behaviour  
70  
71 F70.0 Mild mental retardation (With the statement of no, or minimal, impairment of behaviour)  
72  
73 F70.1 Mild mental retardation (Significant impairment of behaviour requiring attention or treatment)  
74  
75 F70.8 Mild mental retardation (Other impairments of behaviour)  
76  
77 F70.9 Mild mental retardation (Without mention of impairment of behaviour)  
78  
79 F71.1 Moderate mental retardation (Significant impairment of behaviour requiring attention or treatment)  
80  
81 F71.9 Moderate mental retardation (Without mention of impairment of behaviour)  
82  
83 F72.9 Severe mental retardation (Without mention of impairment of behaviour)  
84  
85 F78.0 Other mental retardation (With the statement of no, or minimal, impairment of behaviour)  
86  
87 F78.9 Other mental retardation (Without mention of impairment of behaviour)  
88  
89 F79.0 Unspecified mental retardation (With the statement of no, or minimal, impairment of behaviour)  
90  
91 F79.8 Unspecified mental retardation (Other impairments of behaviour)

1 F79.9 Unspecified mental retardation (Without mention of impairment of behaviour)  
2  
3 F80.0 Specific speech articulation disorder  
4  
5 F80.1 Expressive language disorder  
6  
7 F80.2 Receptive language disorder  
8  
9 F80.3 Acquired aphasia with epilepsy [Landau-Kleffner]  
10  
11 F80.9 Developmental disorder of speech and language, unspecified  
12  
13 F81.0 Specific reading disorder  
14  
15 F81.2 Specific disorder of arithmetical skills  
16  
17 F81.9 Developmental disorder of scholastic skills, unspecified  
18  
19 F82 Specific developmental disorder of motor function  
20  
21 F83 Mixed specific developmental disorders  
22  
23 F84.0 Childhood autism  
24  
25 F84.1 Atypical autism  
26  
27 F84.3 Other childhood disintegrative disorder  
28  
29 F84.4 Overactive disorder associated with mental retardation and stereotyped movements  
30  
31 F84.5 Asperger's syndrome  
32  
33 F84.9 Pervasive developmental disorder, unspecified  
34  
35 F89 Unspecified disorder of psychological development  
36  
37 F90.0 Disturbance of activity and attention  
38  
39 F90.9 Hyperkinetic disorder, unspecified  
40  
41 F91.1 Unsocialised conduct disorder  
42  
43 F91.8 Other conduct disorders  
44  
45 F91.9 Conduct disorder, unspecified  
46  
47 F92.0 Depressive conduct disorder  
48  
49 F92.9 Mixed disorder of conduct and emotions, unspecified  
50  
51 F93.0 Separation anxiety disorder of childhood  
52  
53 F94.0 Elective mutism  
54  
55 F94.1 Reactive attachment disorder of childhood  
56  
57 F95.0 Transient tic disorder  
58  
59 F95.1 Chronic motor or vocal tic disorder  
60  
61 F95.2 Combined vocal and multiple motor tic disorder [de la Tourette]  
62  
63 F95.8 Other tic disorders  
64  
65 F95.9 Tic disorder, unspecified  
66  
67 F98.1 Nonorganic encopresis  
68  
69 F98.5 Stuttering [stammering]  
70  
71 F98.6 Cluttering  
72  
73 F98.8 Other specified behavioural and emotional disorders with onset usually occurring in childhood ;  
74  
75 F99 Mental disorder, not otherwise specified  
76  
77 G00.0 Haemophilus meningitis  
78  
79 G00.1 Pneumococcal meningitis  
80  
81 G00.2 Streptococcal meningitis  
82  
83 G00.3 Staphylococcal meningitis  
84  
85 G00.8 Other bacterial meningitis  
86  
87 G00.9 Bacterial meningitis, unspecified  
88  
89 G01 Meningitis in bacterial diseases classified elsewhere  
90  
91 G02.0 Meningitis in viral diseases classified elsewhere

- 1 G02.1 Meningitis in mycoses
- 2 G03.0 Nonpyogenic meningitis
- 3 G03.1 Chronic meningitis
- 4 G03.2 Benign recurrent meningitis [Mollaret]
- 5 G03.8 Meningitis due to other specified causes
- 6 G03.9 Meningitis, unspecified
- 7 G04.0 Acute disseminated encephalitis
- 8 G04.2 Bacterial meningoencephalitis and meningomyelitis, not elsewhere classified
- 9 G04.8 Other encephalitis, myelitis and encephalomyelitis
- 10 G04.9 Encephalitis, myelitis and encephalomyelitis, unspecified
- 11 G05.0 Encephalitis, myelitis and encephalomyelitis in bacterial diseases classified elsewhere
- 12 G05.1 Encephalitis, myelitis and encephalomyelitis in viral diseases classified elsewhere
- 13 G05.2 Encephalitis, myelitis and encephalomyelitis in other infectious and parasitic diseases classified
- 14 G05.8 Encephalitis, myelitis and encephalomyelitis in other diseases classified elsewhere
- 15 G06.0 Intracranial abscess and granuloma
- 16 G06.1 Intraspinal abscess and granuloma
- 17 G06.2 Extradural and subdural abscess, unspecified
- 18 G07 Intracranial and intraspinal abscess and granuloma in diseases classified elsewhere
- 19 G08 Intracranial and intraspinal phlebitis and thrombophlebitis
- 20 G09 Sequelae of inflammatory diseases of central nervous system
- 21 G10 Huntington's disease
- 22 G11.0 Congenital nonprogressive ataxia
- 23 G11.1 Early-onset cerebellar ataxia
- 24 G11.2 Late-onset cerebellar ataxia
- 25 G11.3 Cerebellar ataxia with defective DNA repair
- 26 G11.4 Hereditary spastic paraplegia
- 27 G11.8 Other hereditary ataxias
- 28 G11.9 Hereditary ataxia, unspecified
- 29 G12.0 Infantile spinal muscular atrophy, type I [Werdnig-Hoffman]
- 30 G12.1 Other inherited spinal muscular atrophy
- 31 G12.2 Motor neuron disease
- 32 G12.8 Other spinal muscular atrophies and related syndromes
- 33 G12.9 Spinal muscular atrophy, unspecified
- 34 G13.0 Paraneoplastic neuromyopathy and neuropathy
- 35 G13.1 Other systemic atrophy primarily affecting central nervous system in neoplastic disease
- 36 G13.8 Systemic atrophy primarily affecting central nervous system in other diseases classified elsewhere
- 37 G14 Postpolio syndrome
- 38 G20 Parkinson's disease
- 39 G21.0 Malignant neuroleptic syndrome
- 40 G21.1 Other drug-induced secondary Parkinsonism
- 41 G21.2 Secondary Parkinsonism due to other external agents
- 42 G21.3 Postencephalitic Parkinsonism
- 43 G21.4 Vascular parkinsonism
- 44 G21.8 Other secondary Parkinsonism
- 45 G21.9 Secondary Parkinsonism, unspecified
- 46 G22 Parkinsonism in diseases classified elsewhere

1 G23.0 Hallervorden-Spatz disease  
2 G23.1 Progressive supranuclear ophthalmoplegia [Steele-Richardson-Olszewski]  
3 G23.2 Striatonigral degeneration  
4 G23.3 Multiple system atrophy, cerebellar type  
5 G23.8 Other specified degenerative diseases of basal ganglia  
6 G23.9 Degenerative disease of basal ganglia, unspecified  
7 G24.0 Drug-induced dystonia  
8 G24.1 Idiopathic familial dystonia  
9 G24.2 Idiopathic nonfamilial dystonia  
10 G24.3 Spasmodic torticollis  
11 G24.4 Idiopathic orofacial dystonia  
12 G24.5 Blepharospasm  
13 G24.8 Other dystonia  
14 G24.9 Dystonia, unspecified  
15 G25.0 Essential tremor  
16 G25.1 Drug-induced tremor  
17 G25.2 Other specified forms of tremor  
18 G25.3 Myoclonus  
19 G25.4 Drug-induced chorea  
20 G25.5 Other chorea  
21 G25.8 Other specified extrapyramidal and movement disorders  
22 G25.9 Extrapyramidal and movement disorder, unspecified  
23 G30.0 Alzheimer's disease with early onset  
24 G30.1 Alzheimer's disease with late onset  
25 G30.8 Other Alzheimer's disease  
26 G30.9 Alzheimer's disease, unspecified  
27 G31.0 Circumscribed brain atrophy  
28 G31.1 Senile degeneration of brain, not elsewhere classified  
29 G31.2 Degeneration of nervous system due to alcohol  
30 G31.8 Other specified degenerative diseases of nervous system  
31 G31.9 Degenerative disease of nervous system, unspecified  
32 G32.0 Subacute combined degeneration of spinal cord in diseases classified elsewhere  
33 G32.8 Other specified degenerative disorders of nervous system in diseases classified elsewhere  
34 G35 Multiple sclerosis  
35 G36.0 Neuromyelitis optica [Devic]  
36 G36.8 Other specified acute disseminated demyelination  
37 G36.9 Acute disseminated demyelination, unspecified  
38 G37.0 Diffuse sclerosis  
39 G37.1 Central demyelination of corpus callosum  
40 G37.2 Central pontine myelinolysis  
41 G37.3 Acute transverse myelitis in demyelinating disease of central nervous system  
42 G37.4 Subacute necrotising myelitis  
43 G37.8 Other specified demyelinating diseases of central nervous system  
44 G37.9 Demyelinating disease of central nervous system, unspecified  
45 G40.0 Localisation-related (focal) (partial) idiopathic epilepsy and epileptic syndromes with seizures or  
46 G40.1 Localisation-related (focal) (partial) symptomatic epilepsy and epileptic syndromes with simple

- 1 G40.2 Localisation-related (focal) (partial) symptomatic epilepsy and epileptic syndromes with complex partial seizures
- 2 G40.3 Generalised idiopathic epilepsy and epileptic syndromes
- 3 G40.4 Other generalised epilepsy and epileptic syndromes
- 4 G40.5 Special epileptic syndromes
- 5 G40.6 Grand mal seizures, unspecified (with or without petit mal)
- 6 G40.7 Petit mal, unspecified, without grand mal seizures
- 7 G40.8 Other epilepsy
- 8 G40.9 Epilepsy, unspecified
- 9 G41.0 Grand mal status epilepticus
- 10 G41.1 Petit mal status epilepticus
- 11 G41.2 Complex partial status epilepticus
- 12 G41.8 Other status epilepticus
- 13 G41.9 Status epilepticus, unspecified
- 14 G43.0 Migraine without aura [common migraine]
- 15 G43.1 Migraine with aura [classical migraine]
- 16 G43.2 Status migrainosus
- 17 G43.3 Complicated migraine
- 18 G43.8 Other migraine
- 19 G43.9 Migraine, unspecified
- 20 G44.0 Cluster headache syndrome
- 21 G44.1 Vascular headache, not elsewhere classified
- 22 G44.2 Tension-type headache
- 23 G44.3 Chronic posttraumatic headache
- 24 G44.4 Drug-induced headache, not elsewhere classified
- 25 G44.8 Other specified headache syndromes
- 26 G45.0 Vertebro-basilar artery syndrome
- 27 G45.1 Carotid artery syndrome (hemispheric)
- 28 G45.2 Multiple and bilateral precerebral artery syndromes
- 29 G45.3 Amaurosis fugax
- 30 G45.4 Transient global amnesia
- 31 G45.8 Other transient cerebral ischaemic attacks and related syndromes
- 32 G45.9 Transient cerebral ischaemic attack, unspecified
- 33 G46.0 Middle cerebral artery syndrome
- 34 G46.1 Anterior cerebral artery syndrome
- 35 G46.2 Posterior cerebral artery syndrome
- 36 G46.3 Brain stem stroke syndrome
- 37 G46.4 Cerebellar stroke syndrome
- 38 G46.5 Pure motor lacunar syndrome
- 39 G46.6 Pure sensory lacunar syndrome
- 40 G46.7 Other lacunar syndromes
- 41 G46.8 Other vascular syndromes of brain in cerebrovascular diseases
- 42 G47.4 Narcolepsy and cataplexy
- 43 G50.0 Trigeminal neuralgia
- 44 G50.1 Atypical facial pain
- 45 G50.8 Other disorders of trigeminal nerve
- 46 G50.9 Disorder of trigeminal nerve, unspecified

- 1 G51.0 Bell's palsy
- 2
- 3 G51.1 Geniculate ganglionitis
- 4
- 5 G51.2 Melkersson's syndrome
- 6
- 7 G51.3 Clonic hemifacial spasm
- 8
- 9 G51.4 Facial myokymia
- 10
- 11 G51.8 Other disorders of facial nerve
- 12
- 13 G51.9 Disorder of facial nerve, unspecified
- 14
- 15 G52.0 Disorders of olfactory nerve
- 16
- 17 G52.1 Disorders of glossopharyngeal nerve
- 18
- 19 G52.2 Disorders of vagus nerve
- 20
- 21 G52.3 Disorders of hypoglossal nerve
- 22
- 23 G52.7 Disorders of multiple cranial nerves
- 24
- 25 G52.8 Disorders of other specified cranial nerves
- 26
- 27 G52.9 Cranial nerve disorder, unspecified
- 28
- 29 G53.0 Postzoster neuralgia
- 30
- 31 G53.1 Multiple cranial nerve palsies in infectious and parasitic diseases classified elsewhere
- 32
- 33 G53.2 Multiple cranial nerve palsies in sarcoidosis
- 34
- 35 G53.3 Multiple cranial nerve palsies in neoplastic disease
- 36
- 37 G53.8 Other cranial nerve disorders in other diseases classified elsewhere
- 38
- 39 G54.0 Brachial plexus disorders
- 40
- 41 G54.1 Lumbosacral plexus disorders
- 42
- 43 G54.2 Cervical root disorders, not elsewhere classified
- 44
- 45 G54.3 Thoracic root disorders, not elsewhere classified
- 46
- 47 G54.4 Lumbosacral root disorders, not elsewhere classified
- 48
- 49 G54.5 Neuralgic amyotrophy
- 50
- 51 G54.6 Phantom limb syndrome with pain
- 52
- 53 G54.7 Phantom limb syndrome without pain
- 54
- 55 G54.8 Other nerve root and plexus disorders
- 56
- 57 G54.9 Nerve root and plexus disorder, unspecified
- 58
- 59 G55.0 Nerve root and plexus compressions in neoplastic disease
- 60
- G55.1 Nerve root and plexus compressions in intervertebral disk disorders
- G55.2 Nerve root and plexus compressions in spondylosis
- G55.3 Nerve root and plexus compressions in other dorsopathies
- G55.8 Nerve root and plexus compressions in other diseases classified elsewhere
- G56.0 Carpal tunnel syndrome
- G56.1 Other lesions of median nerve
- G56.2 Lesion of ulnar nerve
- G56.3 Lesion of radial nerve
- G56.4 Causalgia
- G56.8 Other mononeuropathies of upper limb
- G56.9 Mononeuropathy of upper limb, unspecified
- G57.0 Lesion of sciatic nerve
- G57.1 Meralgia paraesthetica
- G57.2 Lesion of femoral nerve
- G57.3 Lesion of lateral popliteal nerve
- G57.4 Lesion of medial popliteal nerve



1 G57.5 Tarsal tunnel syndrome  
2 G57.6 Lesion of plantar nerve  
3 G57.8 Other mononeuropathies of lower limb  
4 G57.9 Mononeuropathy of lower limb, unspecified  
5 G58.0 Intercostal neuropathy  
6 G58.7 Mononeuritis multiplex  
7 G58.8 Other specified mononeuropathies  
8 G58.9 Mononeuropathy, unspecified  
9 G59.0 Diabetic mononeuropathy  
10 G59.8 Other mononeuropathies in diseases classified elsewhere  
11 G60.0 Hereditary motor and sensory neuropathy  
12 G60.2 Neuropathy in association with hereditary ataxia  
13 G60.3 Idiopathic progressive neuropathy  
14 G60.8 Other hereditary and idiopathic neuropathies  
15 G60.9 Hereditary and idiopathic neuropathy, unspecified  
16 G61.0 Guillain-Barre syndrome  
17 G61.1 Serum neuropathy<sup>1</sup>  
18 G61.8 Other inflammatory polyneuropathies  
19 G61.9 Inflammatory polyneuropathy, unspecified  
20 G62.0 Drug-induced polyneuropathy  
21 G62.1 Alcoholic polyneuropathy  
22 G62.2 Polyneuropathy due to other toxic agents  
23 G62.8 Other specified polyneuropathies  
24 G62.9 Polyneuropathy, unspecified  
25 G63.0 Polyneuropathy in infectious and parasitic diseases classified elsewhere  
26 G63.1 Polyneuropathy in neoplastic disease  
27 G63.2 Diabetic polyneuropathy  
28 G63.3 Polyneuropathy in other endocrine and metabolic diseases  
29 G63.4 Polyneuropathy in nutritional deficiency  
30 G63.5 Polyneuropathy in systemic connective tissue disorders  
31 G63.6 Polyneuropathy in other musculoskeletal disorders  
32 G63.8 Polyneuropathy in other diseases classified elsewhere  
33 G64 Other disorders of peripheral nervous system  
34 G70.0 Myasthenia gravis  
35 G70.2 Congenital and developmental myasthenia  
36 G70.8 Other specified myoneural disorders  
37 G70.9 Myoneural disorder, unspecified  
38 G71.0 Muscular dystrophy  
39 G71.1 Myotonic disorders  
40 G71.2 Congenital myopathies  
41 G71.3 Mitochondrial myopathy, not elsewhere classified  
42 G71.8 Other primary disorders of muscles  
43 G71.9 Primary disorder of muscle, unspecified  
44 G72.0 Drug-induced myopathy  
45 G72.1 Alcoholic myopathy  
46 G72.2 Myopathy due to other toxic agents

1 G72.3 Periodic paralysis  
2  
3 G72.4 Inflammatory myopathy, not elsewhere classified  
4  
5 G72.8 Other specified myopathies  
6  
7 G72.9 Myopathy, unspecified  
8  
9 G73.0 Myasthenic syndromes in endocrine diseases  
10  
11 G73.1 Eaton-Lambert syndrome  
12  
13 G73.5 Myopathy in endocrine diseases  
14  
15 G73.6 Myopathy in metabolic diseases  
16  
17 G73.7 Myopathy other diseases classified elsewhere  
18  
19 G80.0 Spastic cerebral palsy  
20  
21 G80.1 Spastic diplegia  
22  
23 G80.2 Infantile hemiplegia  
24  
25 G80.3 Dyskinetic cerebral palsy  
26  
27 G80.8 Other infantile cerebral palsy  
28  
29 G80.9 Infantile cerebral palsy, unspecified  
30  
31 G81.0 Flaccid hemiplegia  
32  
33 G81.1 Spastic hemiplegia  
34  
35 G81.9 Hemiplegia, unspecified  
36  
37 G82.0 Flaccid paraplegia  
38  
39 G82.1 Spastic paraplegia  
40  
41 G82.2 Paraplegia, unspecified  
42  
43 G82.3 Flaccid tetraplegia  
44  
45 G82.4 Spastic tetraplegia  
46  
47 G82.5 Tetraplegia, unspecified  
48  
49 G83.0 Diplegia of upper limbs  
50  
51 G83.1 Monoplegia of lower limb  
52  
53 G83.2 Monoplegia of upper limb  
54  
55 G83.3 Monoplegia, unspecified  
56  
57 G83.4 Cauda equina syndrome  
58  
59 G83.5 Locked-in syndrome  
60  
61 G83.8 Other specified paralytic syndromes  
62  
63 G83.9 Paralytic syndrome, unspecified  
64  
65 G90.0 Idiopathic peripheral autonomic neuropathy  
66  
67 G90.1 Familial dysautonomia [Riley-Day]  
68  
69 G90.2 Horner's syndrome  
70  
71 G90.3 Multisystem degeneration  
72  
73 G90.4 Autonomic dysreflexia  
74  
75 G90.8 Other disorders of autonomic nervous system  
76  
77 G90.9 Disorder of autonomic nervous system, unspecified  
78  
79 G91.0 Communicating hydrocephalus  
80  
81 G91.1 Obstructive hydrocephalus  
82  
83 G91.2 Normal-pressure hydrocephalus  
84  
85 G91.3 Posttraumatic hydrocephalus, unspecified  
86  
87 G91.8 Other hydrocephalus  
88  
89 G91.9 Hydrocephalus, unspecified  
90  
91 G92 Toxic encephalopathy

- 1
- 2 G93.0 Cerebral cysts
- 3 G93.1 Anoxic brain damage, not elsewhere classified
- 4 G93.2 Benign intracranial hypertension
- 5 G93.3 Postviral fatigue syndrome
- 6 G93.4 Encephalopathy, unspecified
- 7 G93.5 Compression of brain
- 8 G93.6 Cerebral oedema
- 9 G93.7 Reye's syndrome
- 10 G93.8 Other specified disorders of brain
- 11 G93.9 Disorder of brain, unspecified
- 12 G94.0 Hydrocephalus in infectious and parasitic diseases classified elsewhere
- 13 G94.1 Hydrocephalus in neoplastic disease
- 14 G94.2 Hydrocephalus in other diseases classified elsewhere
- 15 G94.8 Other specified disorders of brain in diseases classified elsewhere
- 16 G95.0 Syringomyelia and syringobulbia
- 17 G95.1 Vascular myelopathies
- 18 G95.2 Cord compression, unspecified
- 19 G95.8 Other specified diseases of spinal cord
- 20 G95.9 Disease of spinal cord, unspecified
- 21 G96.0 Cerebrospinal fluid leak
- 22 G96.1 Disorders of meninges, not elsewhere classified
- 23 G96.8 Other specified disorders of central nervous system
- 24 G96.9 Disorder of central nervous system, unspecified
- 25 G97.0 Cerebrospinal fluid leak from spinal puncture
- 26 G97.1 Other reaction to spinal and lumbar puncture
- 27 G97.2 Intracranial hypotension following ventricular shunting
- 28 G97.8 Other postprocedural disorders of nervous system
- 29 G97.9 Postprocedural disorder of nervous system, unspecified
- 30 G98 Other disorders of nervous system, not elsewhere classified
- 31 G99.0 Autonomic neuropathy in endocrine and metabolic diseases
- 32 G99.1 Other disorders of autonomic nervous system in other diseases classified elsewhere
- 33 G99.2 Myelopathy in diseases classified elsewhere
- 34 G99.8 Other specified disorders of nervous system in diseases classified elsewhere
- 35 S02.00 Fracture of vault of skull (closed)
- 36 S02.01 Fracture of vault of skull (open)
- 37 S02.10 Fracture of base of skull (closed)
- 38 S02.11 Fracture of base of skull (open)
- 39 S02.70 Multiple fractures involving skull and facial bones (closed)
- 40 S02.71 Multiple fractures involving skull and facial bones (open)
- 41 S02.80 Fractures of other skull and facial bones (closed)
- 42 S02.81 Fractures of other skull and facial bones (open)
- 43 S02.90 Fracture of skull and facial bones, part unspecified (closed)
- 44 S02.91 Fracture of skull and facial bones, part unspecified (open)
- 45 S04.0 Injury of optic nerve and pathways
- 46 S04.1 Injury of oculomotor nerve
- 47 S04.2 Injury of trochlear nerve
- 48
- 49
- 50
- 51
- 52
- 53
- 54
- 55
- 56
- 57
- 58
- 59
- 60

1 S04.3 Injury of trigeminal nerve  
2 S04.5 Injury of facial nerve  
3 S04.8 Injury of other cranial nerves  
4 S04.9 Injury of unspecified cranial nerve  
5 S06.00 Concussion (without open intracranial wound)  
6 S06.01 Concussion (with open intracranial wound)  
7 S06.10 Traumatic cerebral oedema (without open intracranial wound)  
8 S06.20 Diffuse brain injury (without open intracranial wound)  
9 S06.21 Diffuse brain injury (with open intracranial wound)  
10 S06.30 Focal brain injury (without open intracranial wound)  
11 S06.31 Focal brain injury (with open intracranial wound)  
12 S06.40 Epidural haemorrhage (without open intracranial wound)  
13 S06.41 Epidural haemorrhage (with open intracranial wound)  
14 S06.50 Traumatic subdural haemorrhage (without open intracranial wound)  
15 S06.51 Traumatic subdural haemorrhage (with open intracranial wound)  
16 S06.60 Traumatic subarachnoid haemorrhage (without open intracranial wound)  
17 S06.61 Traumatic subarachnoid haemorrhage (with open intracranial wound)  
18 S06.70 Intracranial injury with prolonged coma (without open intracranial wound)  
19 S06.80 Other intracranial injuries (without open intracranial wound)  
20 S06.81 Other intracranial injuries (with open intracranial wound)  
21 S06.90 Intracranial injury, unspecified (without open intracranial wound)  
22 S06.91 Intracranial injury, unspecified (with open intracranial wound)  
23 S09.7 Multiple injuries of head  
24 S09.9 Unspecified injury of head  
25 T90.1 Sequelae of open wound of head  
26 T90.2 Sequelae of fracture of skull and facial bones  
27 T90.3 Sequelae of injury of cranial nerves  
28 T90.5 Sequelae of intracranial injury  
29 T90.8 Sequelae of other specified injuries of head  
30 T90.9 Sequelae of unspecified injury of head  
31 T91.3 Sequelae of injury of spinal cord  
32  
33  
34  
35  
36  
37  
38  
39  
40  
41  
42  
43  
44  
45  
46  
47  
48  
49  
50  
51  
52  
53  
54  
55  
56  
57  
58  
59  
60

## Codes for the psychotropic medications used as exclusion criteria

| Field ID | Code       | Description                                              |
|----------|------------|----------------------------------------------------------|
| 20003    | 1140921600 | citalopram                                               |
| 20003    | 1141180212 | escitalopram                                             |
| 20003    | 1141190158 | cipralext 5mg tablet                                     |
| 20003    | 1141151946 | cipramil 10mg tablet                                     |
| 20003    | 1140879540 | fluoxetine                                               |
| 20003    | 1140867876 | prozac 20mg capsule                                      |
| 20003    | 1140867878 | sertraline                                               |
| 20003    | 1140879544 | fluvoxamine                                              |
| 20003    | 1140867860 | faverin 50mg tablet                                      |
| 20003    | 1140867888 | paroxetine                                               |
| 20003    | 1140882236 | seroxat 20mg tablet                                      |
| 20003    | 1140867884 | lustral 50mg tablet                                      |
| 20003    | 1140916282 | venlafaxine                                              |
| 20003    | 1141200564 | duloxetine                                               |
| 20003    | 1141201834 | cymbalta 30mg gastro-resistant capsule                   |
| 20003    | 1140916288 | efexor 37.5mg tablet                                     |
| 20003    | 1140917460 | nefazodone                                               |
| 20003    | 1140917466 | duotonin 100mg tablet                                    |
| 20003    | 1140879634 | trazodone                                                |
| 20003    | 1141151978 | reboxetine                                               |
| 20003    | 1141151982 | edronax 4mg tablet                                       |
| 20003    | 1140879688 | viloxazine                                               |
| 20003    | 1140867770 | vivalan 50mg tablet                                      |
| 20003    | 1141199446 | atomoxetine                                              |
| 20003    | 1141199460 | strattera 10mg capsule                                   |
| 20003    | 1141176854 | bupropion                                                |
| 20003    | 1140879616 | amitriptyline                                            |
| 20003    | 1140867938 | amitriptyline+chlordiazepoxide 12.5mg/5mg capsule        |
| 20003    | 1140867948 | amitriptyline hydrochloride+perphenazine 10mg/2mg tablet |
| 20003    | 1140867658 | elavil 10mg tablet                                       |
| 20003    | 1140879620 | clomipramine                                             |
| 20003    | 1140867690 | anafranil 10mg capsule                                   |
| 20003    | 1140879624 | desipramine                                              |
| 20003    | 1140909806 | dosulepin                                                |
| 20003    | 1140867624 | prothiaden 25mg capsule                                  |
| 20003    | 1141168396 | doxepin hydrochloride 5% cream                           |
| 20003    | 1140882312 | sinequan 10mg capsule                                    |
| 20003    | 1140879630 | imipramine                                               |
| 20003    | 1140867712 | tofranil 10mg tablet                                     |
| 20003    | 1140867726 | lofepramine                                              |
| 20003    | 1141146062 | lomont 70mg/5ml s/f suspension                           |
| 20003    | 1140882310 | gamanil 70mg tablet                                      |

1  
2 20003 1140867818 nortriptyline  
3 20003 1140867940 fluphenazine hydrochloride+nortriptyline 1.5mg/30mg tablet  
4 20003 1140867942 fluphenazine hcl+nortriptyline 500micrograms/10mg tablet  
5  
6 20003 1140867824 aventyl 10mg capsule  
7 20003 1140879632 protriptyline  
8 20003 1140867756 trimipramine  
9  
10 20003 1140867758 surmontil 10mg tablet  
11 20003 1140867720 iprindole  
12 20003 1140867722 prondol 15mg tablet  
13  
14 20003 1140867734 concordin 5mg tablet  
15 20003 1140856074 butriptyline  
16 20003 1140856076 evadyne 25mg tablet  
17  
18 20003 1140867774 amoxapine  
19 20003 1140867840 asendis 25mg tablet  
20 20003 1140879552 maprotiline  
21  
22 20003 1140867784 ludiomil 10mg tablet  
23 20003 1140879556 mianserin  
24 20003 1141152732 mirtazapine  
25  
26 20003 1140867856 isocarboxazid  
27 20003 1140867858 marplan 10mg tablet  
28 20003 1140910704 maoi - phenelzine  
29  
30 20003 1140867850 phenelzine  
31 20003 1140867852 nardil 15mg tablet  
32 20003 1140867914 tranylcypromine  
33 20003 1140867916 parnate 10mg tablet  
34  
35 20003 1140879668 selegiline  
36 20003 1140872348 eldepryl 5mg tablet  
37 20003 1141169666 zelapar 1.25mg tablet  
38  
39 20003 1140867920 moclobemide  
40 20003 1140867922 manerix 150mg tablet  
41 20003 1140867960 tryptophan product  
42  
43 20003 1140879674 pipothiazine  
44 20003 1141153490 amisulpride  
45 20003 1141184742 solian 100mg/ml s/f oral solution  
46  
47 20003 1141195974 aripiprazole  
48 20003 1141202024 abilify 5mg tablet  
49 20003 1140928916 olanzapine  
50  
51 20003 1141167976 zyprexa 2.5mg tablet  
52 20003 1141152848 quetiapine  
53 20003 1141152860 seroquel 25mg tablet  
54  
55 20003 1140867444 risperidone  
56 20003 1141177762 risperdal 0.5mg tablet  
57 20003 1140867078 benperidol  
58  
59 20003 1140867084 droperidol  
60 20003 1140867080 anquil 250micrograms tablet  
20003 1140867086 droleptan 10mg tablet

1  
2 20003 1140867168 haloperidol  
3 20003 1140867180 doxic 1mg/ml oral liquid  
4 20003 1140867184 haldol 5mg tablet  
5  
6 20003 1140867092 serenace 500micrograms capsule  
7 20003 1140867546 fluspirilene  
8 20003 1140867548 redeptin 2mg/1ml injection  
9  
10 20003 1140867218 pimozide  
11 20003 1140879658 chlorpromazine  
12 20003 1140910358 cpz - chlorpromazine  
13  
14 20003 1140867398 fluphenazine decanoate  
15 20003 1140867940 fluphenazine hydrochloride+nortriptyline 1.5mg/30mg tablet  
16 20003 1140867942 fluphenazine hcl+nortriptyline 500micrograms/10mg tablet  
17  
18 20003 1140867944 tranylcypromine+trifluoperazine 10mg/1mg tablet  
19 20003 1140867948 amitriptyline hydrochloride+perphenazine 10mg/2mg tablet  
20 20003 1140909802 levomepromazine  
21  
22 20003 1140867122 nozinan 25mg tablet  
23 20003 1140867134 pericyazine  
24 20003 1140867136 neulactil 2.5mg tablet  
25  
26 20003 1140867208 perphenazine  
27 20003 1140867210 fentazin 2mg tablet  
28 20003 1140909804 pipotiazine  
29  
30 20003 1140867572 piportil depot 50mg/1ml oily injection  
31 20003 1140868170 prochlorperazine  
32 20003 1140868172 stemetil 5mg tablet  
33  
34 20003 1140879746 promazine  
35 20003 1140867288 sparine 50mg/5ml suspension  
36 20003 1140882082 promethazine product  
37 20003 1140879750 thioridazine  
38  
39 20003 1140867312 melleril 10mg tablet  
40 20003 1140867304 sulpiride  
41 20003 1140868120 trifluoperazine  
42  
43 20003 1140867244 stelazine 1mg tablet  
44 20003 1140856052 chlorprothixene  
45 20003 1140882100 zuclopenthixol  
46 20003 1140867150 flupenthixol  
47  
48 20003 1140867152 depixol 3mg tablet  
49 20003 1140867156 moditen 1mg tablet  
50  
51 20003 1140867342 clopixol 2mg tablet  
52 20003 1140867306 dolmatil 200mg tablet  
53 20003 1141185130 sulpor 200mg/5ml oral solution  
54  
55 20003 1140867406 loxapine  
56 20003 1140867414 loxapac 10mg capsule  
57 20003 1140867420 clozapine  
58 20003 1140879704 remoxipride  
59  
60 20003 1140867432 roxiam 150mg m/r capsule  
20003 1140882320 clozaril 25mg tablet

1  
2 20003 1141169714 zotepine  
3 20003 1141169722 zoleptil 25mg tablet  
4 20003 1140927956 sertindole  
5  
6 20003 1140927970 serdolect 4mg tablet  
7 20003 1140855960 fortunan 500micrograms tablet  
8 20003 1141200004 pregabalin  
9  
10 20003 1141200072 lyrica 25mg capsule  
11 20003 1140883656 hydroxyzine  
12 20003 1140863286 atarax 10mg tablet  
13 20003 1140863292 ucerax 25mg tablet  
14 20003 1140863302 lorazepam  
15 20003 1140863308 alprazolam  
16 20003 1140863310 xanax 250mcg tablet  
17 20003 1140863318 bromazepam  
18 20003 1140863320 lexotan 1.5mg tablet  
19 20003 1140863364 ativan 1mg tablet  
20 20003 1140863372 medazepam  
21 20003 1140863374 nobrium 5mg capsule  
22 20003 1140863268 clobazam  
23 20003 1140863272 frisium 10mg capsule  
24 20003 1140863274 potassium clorazepate  
25 20003 1140863276 tranxene 7.5mg capsule  
26 20003 1140863152 diazepam  
27 20003 1140863164 rimapam 2mg tablet  
28 20003 1140863170 diazemuls 10mg/2ml injection  
29 20003 1140863172 dialar 2mg/5ml syrup  
30 20003 1140863234 stesolid 5mg rectal solution  
31 20003 1140863238 tensium 2mg tablet  
32 20003 1140863244 valium 2mg tablet  
33 20003 1140863250 valium 2mg/5ml syrup  
34 20003 1140863442 oxazepam  
35 20003 1140863454 buspar 5mg tablet  
36 20003 1140879730 buspirone  
37 20003 1140855944 prazepam  
38 20003 1140855946 centrax 10mg tablet  
39 20003 1140863328 chlordiazepoxide  
40 20003 1140863350 librium 5mg tablet  
41 20003 1140872150 clonazepam  
42 20003 1140872152 rivotril 500mcg tablet  
43 20003 1140856092 pacitron 500mg tablet  
44 20003 1140856108 villescon tablet  
45  
46  
47  
48  
49  
50  
51  
52  
53  
54  
55  
56  
57  
58  
59  
60



## Codes for the endoc

| Field ID | Code |
|----------|------|
| 20002    | 1214 |
| 20002    | 1220 |
| 20002    | 1221 |
| 20002    | 1222 |
| 20002    | 1223 |
| 20002    | 1224 |
| 20002    | 1225 |
| 20002    | 1226 |
| 20002    | 1228 |
| 20002    | 1229 |
| 20002    | 1230 |
| 20002    | 1232 |
| 20002    | 1233 |
| 20002    | 1234 |
| 20002    | 1235 |
| 20002    | 1236 |
| 20002    | 1237 |
| 20002    | 1238 |
| 20002    | 1239 |
| 20002    | 1350 |
| 20002    | 1428 |
| 20002    | 1429 |
| 20002    | 1430 |
| 20002    | 1431 |
| 20002    | 1432 |
| 20002    | 1521 |
| 20002    | 1522 |
| 20002    | 1610 |
| 20002    | 1611 |
| 20002    | 1682 |
| 41270    | C73  |
| 41270    | C740 |
| 41270    | C741 |
| 41270    | C749 |
| 41270    | C750 |
| 41270    | C751 |
| 41270    | C752 |
| 41270    | C753 |
| 41270    | C754 |
| 41270    | C755 |
| 41270    | C758 |
| 41270    | C759 |

1  
2 41270 E011  
3 41270 E018  
4 41270 E02  
5  
6 41270 E030  
7 41270 E031  
8 41270 E032  
9  
10 41270 E033  
11 41270 E034  
12 41270 E035  
13  
14 41270 E038  
15 41270 E039  
16 41270 E040  
17 41270 E041  
18 41270 E042  
19 41270 E048  
20 41270 E049  
21 41270 E050  
22 41270 E051  
23 41270 E052  
24 41270 E053  
25 41270 E054  
26 41270 E055  
27 41270 E058  
28 41270 E059  
29 41270 E060  
30 41270 E061  
31 41270 E062  
32 41270 E063  
33 41270 E064  
34 41270 E065  
35 41270 E069  
36 41270 E070  
37 41270 E071  
38 41270 E078  
39 41270 E079  
40 41270 E100  
41 41270 E101  
42 41270 E102  
43 41270 E103  
44 41270 E104  
45 41270 E105  
46 41270 E106  
47 41270 E107  
48 41270 E108  
49 41270 E109  
50 41270 E110  
51  
52  
53  
54  
55  
56  
57  
58  
59  
60

For peer review only

1  
2 41270 E111  
3 41270 E112  
4 41270 E113  
5 41270 E114  
6 41270 E114  
7 41270 E115  
8 41270 E116  
9  
10 41270 E117  
11 41270 E118  
12 41270 E119  
13  
14 41270 E121  
15 41270 E123  
16 41270 E125  
17  
18 41270 E128  
19 41270 E129  
20 41270 E130  
21  
22 41270 E131  
23 41270 E132  
24 41270 E133  
25  
26 41270 E134  
27 41270 E135  
28 41270 E136  
29  
30 41270 E137  
31 41270 E138  
32 41270 E139  
33  
34 41270 E140  
35 41270 E141  
36 41270 E142  
37 41270 E143  
38  
39 41270 E144  
40 41270 E145  
41 41270 E146  
42  
43 41270 E147  
44 41270 E148  
45 41270 E149  
46  
47 41270 E15  
48 41270 E160  
49 41270 E161  
50  
51 41270 E162  
52 41270 E163  
53 41270 E164  
54  
55 41270 E168  
56 41270 E169  
57 41270 E200  
58 41270 E201  
59  
60 41270 E208  
41270 E209

For peer review only

1  
2 41270 E210  
3 41270 E211  
4 41270 E212  
5  
6 41270 E213  
7 41270 E214  
8 41270 E215  
9  
10 41270 E220  
11 41270 E221  
12 41270 E222  
13  
14 41270 E228  
15 41270 E229  
16 41270 E230  
17 41270 E231  
18 41270 E232  
19 41270 E233  
20 41270 E233  
21 41270 E236  
22 41270 E237  
23 41270 E240  
24 41270 E241  
25 41270 E242  
26 41270 E243  
27 41270 E244  
28 41270 E248  
29 41270 E249  
30 41270 E250  
31 41270 E258  
32 41270 E259  
33 41270 E270  
34 41270 E271  
35 41270 E272  
36 41270 E273  
37 41270 E274  
38 41270 E275  
39 41270 E278  
40 41270 E279  
41 41270 E281  
42 41270 E282  
43 41270 E283  
44 41270 E288  
45 41270 E289  
46 41270 E290  
47 41270 E291  
48 41270 E298  
49 41270 E299  
50  
51 41270 E351  
52 41270 E340  
53  
54  
55  
56  
57  
58  
59  
60

For peer review only

1  
2 rine conditions used as exclusion criteria for the control group  
3  
4

5 **Description**

6 testicular problems (not cancer)  
7 diabetes  
8 gestational diabetes  
9 type 1 diabetes  
10 type 2 diabetes  
11 thyroid problem (not cancer)  
12 hyperthyroidism/thyrotoxicosis  
13 hypothyroidism/myxoedema  
14 thyroid radioablation therapy  
15 parathyroid gland problem (not cancer)  
16 parathyroid hyperplasia/adenoma  
17 disorder of adrenal gland  
18 adrenal tumour  
19 adrenocortical insufficiency/addison's disease  
20 hyperaldosteronism/conn's syndrome  
21 phaeochromocytoma  
22 disorder of pituitary gland  
23 pituitary adenoma/tumour  
24 cushings syndrome  
25 polycystic ovaries/polycystic ovarian syndrome  
26 thyroiditis  
27 acromegaly  
28 hypopituitarism  
29 hyperprolactinaemia  
30 carcinoid syndrome/tumour  
31 diabetes insipidus  
32 grave's disease  
33 thyroid goitre  
34 hyperparathyroidism  
35 benign insulinoma  
36 C73 Malignant neoplasm of thyroid gland  
37 C74.0 Cortex of adrenal gland  
38 C74.1 Medulla of adrenal gland  
39 C74.9 Adrenal gland, unspecified  
40 C75.0 Parathyroid gland  
41 C75.1 Pituitary gland  
42 C75.2 Craniopharyngeal duct  
43 C75.3 Pineal gland  
44 C75.4 Carotid body  
45 C75.5 Aortic body and other paraganglia  
46 C75.8 Pluriglandular involvement, unspecified  
47 C75.9 Endocrine gland, unspecified  
48  
49  
50  
51  
52  
53  
54  
55  
56  
57  
58  
59  
60

- 1 E01.1 Iodine-deficiency-related multinodular (endemic) goitre
- 2 E01.8 Other iodine-deficiency-related thyroid disorders and allied conditions
- 3 E02 Subclinical iodine-deficiency hypothyroidism
- 4 E03.0 Congenital hypothyroidism with diffuse goitre
- 5 E03.1 Congenital hypothyroidism without goitre
- 6 E03.2 Hypothyroidism due to medicaments and other exogenous substances
- 7 E03.3 Postinfectious hypothyroidism
- 8 E03.4 Atrophy of thyroid (acquired)
- 9 E03.5 Myxoedema coma
- 10 E03.8 Other specified hypothyroidism
- 11 E03.9 Hypothyroidism, unspecified
- 12 E04.0 Non-toxic diffuse goitre
- 13 E04.1 Non-toxic single thyroid nodule
- 14 E04.2 Non-toxic multinodular goitre
- 15 E04.8 Other specified non-toxic goitre
- 16 E04.9 Non-toxic goitre, unspecified
- 17 E05.0 Thyrotoxicosis with diffuse goitre
- 18 E05.1 Thyrotoxicosis with toxic single thyroid nodule
- 19 E05.2 Thyrotoxicosis with toxic multinodular goitre
- 20 E05.3 Thyrotoxicosis from ectopic thyroid tissue
- 21 E05.4 Thyrotoxicosis factitia
- 22 E05.5 Thyroid crisis or storm
- 23 E05.8 Other thyrotoxicosis
- 24 E05.9 Thyrotoxicosis, unspecified
- 25 E06.0 Acute thyroiditis
- 26 E06.1 Subacute thyroiditis
- 27 E06.2 Chronic thyroiditis with transient thyrotoxicosis
- 28 E06.3 Autoimmune thyroiditis
- 29 E06.4 Drug-induced thyroiditis
- 30 E06.5 Other chronic thyroiditis
- 31 E06.9 Thyroiditis, unspecified
- 32 E07.0 Hypersecretion of calcitonin
- 33 E07.1 Dyshormogenetic goitre
- 34 E07.8 Other specified disorders of thyroid
- 35 E07.9 Disorder of thyroid, unspecified
- 36 E10.0 With coma
- 37 E10.1 With ketoacidosis
- 38 E10.2 With renal complications
- 39 E10.3 With ophthalmic complications
- 40 E10.4 With neurological complications
- 41 E10.5 With peripheral circulatory complications
- 42 E10.6 With other specified complications
- 43 E10.7 With multiple complications
- 44 E10.8 With unspecified complications
- 45 E10.9 Without complications
- 46 E11.0 With coma

- 1 E11.1 With ketoacidosis
- 2 E11.2 With renal complications
- 3 E11.3 With ophthalmic complications
- 4 E11.4 With neurological complications
- 5 E11.5 With peripheral circulatory complications
- 6 E11.6 With other specified complications
- 7 E11.7 With multiple complications
- 8 E11.8 With unspecified complications
- 9 E11.9 Without complications
- 10 E12.1 With ketoacidosis
- 11 E12.3 With ophthalmic complications
- 12 E12.5 With peripheral circulatory complications
- 13 E12.8 With unspecified complications
- 14 E12.9 Without complications
- 15 E13.0 With coma
- 16 E13.1 With ketoacidosis
- 17 E13.2 With renal complications
- 18 E13.3 With ophthalmic complications
- 19 E13.4 With neurological complications
- 20 E13.5 With peripheral circulatory complications
- 21 E13.6 With other specified complications
- 22 E13.7 With multiple complications
- 23 E13.8 With unspecified complications
- 24 E13.9 Without complications
- 25 E14.0 With coma
- 26 E14.1 With ketoacidosis
- 27 E14.2 With renal complications
- 28 E14.3 With ophthalmic complications
- 29 E14.4 With neurological complications
- 30 E14.5 With peripheral circulatory complications
- 31 E14.6 With other specified complications
- 32 E14.7 With multiple complications
- 33 E14.8 With unspecified complications
- 34 E14.9 Without complications
- 35 E15 Nondiabetic hypoglycaemic coma
- 36 E16.0 Drug-induced hypoglycaemia without coma
- 37 E16.1 Other hypoglycaemia
- 38 E16.2 Hypoglycaemia, unspecified
- 39 E16.3 Increased secretion of glucagon
- 40 E16.4 Abnormal secretion of gastrin
- 41 E16.8 Other specified disorders of pancreatic internal secretion
- 42 E16.9 Disorder of pancreatic internal secretion, unspecified
- 43 E20.0 Idiopathic hypoparathyroidism
- 44 E20.1 Pseudohypoparathyroidism
- 45 E20.8 Other hypoparathyroidism
- 46 E20.9 Hypoparathyroidism, unspecified

- 1 E21.0 Primary hyperparathyroidism
- 2 E21.1 Secondary hyperparathyroidism, not elsewhere classified
- 3 E21.2 Other hyperparathyroidism
- 4 E21.3 Hyperparathyroidism, unspecified
- 5 E21.4 Other specified disorders of parathyroid gland
- 6 E21.5 Disorder of parathyroid gland, unspecified
- 7 E22.0 Acromegaly and pituitary gigantism
- 8 E22.1 Hyperprolactinaemia
- 9 E22.2 Syndrome of inappropriate secretion of antidiuretic hormone
- 10 E22.8 Other hyperfunction of pituitary gland
- 11 E22.9 Hyperfunction of pituitary gland, unspecified
- 12 E23.0 Hypopituitarism
- 13 E23.1 Drug-induced hypopituitarism
- 14 E23.2 Diabetes insipidus
- 15 E23.3 Hypothalamic dysfunction, not elsewhere classified
- 16 E23.6 Other disorders of pituitary gland
- 17 E23.7 Disorder of pituitary gland, unspecified
- 18 E24.0 Pituitary-dependent Cushing's disease
- 19 E24.1 Nelson's syndrome
- 20 E24.2 Drug-induced Cushing's syndrome
- 21 E24.3 Ectopic ACTH syndrome
- 22 E24.4 Alcohol-induced pseudo-Cushing's syndrome
- 23 E24.8 Other Cushing's syndrome
- 24 E24.9 Cushing's syndrome, unspecified
- 25 E25.0 Congenital adrenogenital disorders associated with enzyme deficiency
- 26 E25.8 Other adrenogenital disorders
- 27 E25.9 Adrenogenital disorder, unspecified
- 28 E27.0 Other adrenocortical overactivity
- 29 E27.1 Primary adrenocortical insufficiency
- 30 E27.2 Addisonian crisis
- 31 E27.3 Drug-induced adrenocortical insufficiency
- 32 E27.4 Other and unspecified adrenocortical insufficiency
- 33 E27.5 Adrenomedullary hyperfunction
- 34 E27.8 Other specified disorders of adrenal gland
- 35 E27.9 Disorder of adrenal gland, unspecified
- 36 E28.1 Androgen excess
- 37 E28.2 Polycystic ovarian syndrome
- 38 E28.3 Primary ovarian failure
- 39 E28.8 Other ovarian dysfunction
- 40 E28.9 Ovarian dysfunction, unspecified
- 41 E29.0 Testicular hyperfunction
- 42 E29.1 Testicular hypofunction
- 43 E29.8 Other testicular dysfunction
- 44 E29.9 Testicular dysfunction, unspecified
- 45 E35.1 Disorders of adrenal glands in diseases classified elsewhere
- 46 E34.0 Carcinoid syndrome



| Field ID | Description                                                               |
|----------|---------------------------------------------------------------------------|
| 20023    | Mean time to correctly identify matches (Reaction time)                   |
| 20016    | Fluid intelligence score (Fluid intelligence)                             |
| 6348     | Duration to complete numeric path (trail #1) (Trail making A)             |
| 6350     | Duration to complete alphanumeric path (trail #2) (Trail making B)        |
| 23324    | Number of symbol digit matches made correctly (Symbol digit substitution) |
| 4282     | Maximum digits remembered correctly (Digit span)                          |

For peer review only

| Field ID | Description                                             |
|----------|---------------------------------------------------------|
| 2050     | Frequency of depressed mood in last 2 weeks             |
| 2060     | Frequency of unenthusiasm / disinterest in last 2 weeks |
| 2070     | Frequency of tenseness / restlessness in last 2 weeks   |
| 2080     | Frequency of tiredness / lethargy in last 2 weeks       |

For peer review only

| Field ID | Description                                                                    |
|----------|--------------------------------------------------------------------------------|
| 31       | Sex                                                                            |
| 21003    | Age when attended assessment center                                            |
| 6138     | Qualifications (education)                                                     |
| 20116    | Smoking status                                                                 |
| 53       | Year of imaging                                                                |
| 54       | Assessment center                                                              |
| 25756    | Scanner lateral (X) brain position                                             |
| 25757    | Scanner transverse (Y) brain position                                          |
| 25758    | Scanner longitudinal (Z) brain position                                        |
| 25759    | Scanner table position                                                         |
| 25000    | Volumetric scaling from T1 head image to standard space (measure of head size) |
| 23104    | Body mass index measured by body impedance                                     |
| 23099    | Total body fat percentage measured by body impedance                           |

**Supplement 2.** Structural or diffusion MRI studies in patients with Cushing disease or exogenous glucocorticoid use

|                    | <b>Cohort</b>                                                                                                                           | <b>Imaging modality</b> | <b>Findings</b>                                                                                                                                                                                                                                                                                                                        |
|--------------------|-----------------------------------------------------------------------------------------------------------------------------------------|-------------------------|----------------------------------------------------------------------------------------------------------------------------------------------------------------------------------------------------------------------------------------------------------------------------------------------------------------------------------------|
|                    | <b>Cushing</b>                                                                                                                          |                         |                                                                                                                                                                                                                                                                                                                                        |
| Andela 2013 [1]    | 25 CD patients with long-term remission, 25 healthy controls                                                                            | Volumetric MRI          | Patients had reduced GMV in ACC and increased GMV in left posterior lobe of cerebellum. Patients reported more psychological and cognitive symptoms than controls, but these were not associated with GMV changes.                                                                                                                     |
| Bauduin 2020 [2]   | 25 CD patients with long-term remission, 25 healthy controls                                                                            | Volumetric MRI          | Patients had reduced cortical thickness in left caudal ACC, right rostral ACC, left cuneus, left PCC, and bilateral precuneus. Cortical thickness in left caudal ACC and left cuneus were inversely associated with anxiety, depressive symptoms, and disease duration.                                                                |
| Bourdeau 2002 [3]  | 38 patients with active CS (21 with CD 17 with adrenal CS), 18 patients with other non-ACTH-secreting sellar tumors, 20 normal controls | Volumetric MRI          | Overall loss of brain volume and increased ventricle diameters in CS patients. Re-imaging in 22 CS patients at 40 months after correction of hypercortisolism showed a decrease in ventricle diameters and increase in brain volume compared to active disease.                                                                        |
| Burkhardt 2015 [4] | 19 patients with active untreated CD, 40 healthy controls                                                                               | Volumetric MRI          | CD patients had reduced GMV in hippocampus and cerebellum compared to controls.                                                                                                                                                                                                                                                        |
| Chen 2020 [5]      | 101 patients with active untreated CD, and 95 patients with NFA (controls)                                                              | Volumetric MRI          | CD patients had more cortical and subcortical atrophy, more white matter hyperintensities, and decreased hippocampal height. Follow-up of 14 CD patients showed partial reversion of brain atrophy and white matter hyperintensities after correction of hypercortisolism.                                                             |
| Crespo 2014 [6]    | 35 patients with CS (27 cured, 8 medically treated), 35 controls                                                                        | Volumetric MRI          | No differences were found between cured and treated CS patients. Patients had decreased cortical thickness in the left superior frontal cortex, precentral cortex, left insular cortex, left and right rostral ACC, and right caudal middle frontal cortex compared to controls. Patients also had altered decision-making strategies. |
| Hou [7]            | 50 patients with active CD, 36 healthy controls                                                                                         | Volumetric MRI          | Patients had reductions in total GMV and frontal, parietal, occipital, and temporal lobes; insula; cingulate lobe; and enlargement of lateral and third ventricles. All affected brain regions improved significantly after TSS. No differences in volume of hippocampus or amygdala.                                                  |
| Jiang 2017 [8]     | 34 patients with CD (14 with short-term remission, 20 with active CD), 34 controls                                                      | Volumetric MRI          | Remitted CD patients had greater GMV in bilateral caudate; no differences in GMV of MFG or cerebellum compared to controls. Active CD patients had smaller GMV in MFG and cerebellum compared to controls and remitted patients.                                                                                                       |
| Jiang 2017 [9]     | 15 patients with active CD, 15 healthy controls                                                                                         | DKI                     | White matter: increased MD in the splenium of the corpus callosum, bilateral frontal lobe, and left temporal lobe. AD was mainly increased in the bilateral                                                                                                                                                                            |

|                   |                                                                                                                           |                       |                                                                                                                                                                                                                                                                                                                                                                                                                                                                                                                                                                                                                                                    |
|-------------------|---------------------------------------------------------------------------------------------------------------------------|-----------------------|----------------------------------------------------------------------------------------------------------------------------------------------------------------------------------------------------------------------------------------------------------------------------------------------------------------------------------------------------------------------------------------------------------------------------------------------------------------------------------------------------------------------------------------------------------------------------------------------------------------------------------------------------|
|                   |                                                                                                                           |                       | frontal lobe, and RD mainly in the left temporal lobe. FA was mainly decreased in the splenium of the corpus callosum and the left temporal lobe.<br>Gray matter: increased MD, RD, and AD in the left hippocampus/parahippocampal gyrus and the left temporal lobe, increased radial kurtosis in the right cerebellar hemisphere, decreased axial kurtosis in the left frontal lobe and decreased mean kurtosis in left cerebellar hemisphere.                                                                                                                                                                                                    |
| Merke 2005 [10]   | 11 pediatric patients with active CS, 10 healthy controls                                                                 | Volumetric MRI        | CD patients had smaller cerebral volumes, larger ventricles, and a smaller amygdala. One year after surgical cure, cerebral atrophy was reversed, but children showed a decline in IQ and school performance.                                                                                                                                                                                                                                                                                                                                                                                                                                      |
| Momose 1971 [11]  | 31 patients with active CD, 64 patients with acromegaly, 36 patients with chromophobe adenoma                             | Pneumoencephalography | Cerebral cortical atrophy was present in 90% and cerebellar cortical atrophy in 74% of patients with CD. In controls with acromegaly, this was 30% and 3%, respectively. In controls with a chromophobe adenoma, this was 58% and 20%, respectively.                                                                                                                                                                                                                                                                                                                                                                                               |
| Pires 2015 [12]   | 35 patients with CS (8 active hypercortisolism, 7 medication-remitted cortisol, 20 surgically cured), 35 healthy controls | DTI                   | Patients had widespread alteration in white matter integrity (increased FA, decreased MD, RD, AD) compared to controls. Both active and cured CS patients showed increased FA, and decreased MD, RD, and AD; medically treated CS patients did not have significantly different AD values.                                                                                                                                                                                                                                                                                                                                                         |
| Pires 2017 [13]   | 35 patients with CS (8 active hypercortisolism, 7 medication-remitted cortisol, 20 surgically cured), 35 healthy controls | DTI                   | All patient groups had more depression and anxiety than controls. Depression scores correlated negatively to FA (in right corticospinal tract (CST), forceps major, forceps minor, left inferior fronto-occipital fasciculus (IFOF) (frontal part), right IFOF, right inferior longitudinal fasciculus (ILF), left superior longitudinal fasciculus (SLF) (anterior part) and right SLF), and positively to RD values (in frontal regions of the forceps minor and frontal areas of bilateral IFOFs). Although processing speed did not differ between groups, Symbol Digit Modalities Test scores correlated positively to both FA and AD values. |
| Resmini 2012 [14] | 33 patients with CS (11 active, 22 cured), 34 controls                                                                    | Volumetric MRI        | Patients had reduced total and cortical brain gray matter volumes compared with controls. Subcortical gray matter (which includes hippocampal volume) was reduced only in 12 patients with severe memory impairment. No differences in hippocampal volume were reported between patients with active or cured CS.                                                                                                                                                                                                                                                                                                                                  |
| Santos 2014 [15]  | 36 patients with CS (15 active, 21 in remission), 36 controls                                                             | Volumetric MRI        | Patients with active CS had smaller cerebellar cortex volumes, and patients with remitted CS showed a similar trend. Cerebellar white matter volume showed no differences.                                                                                                                                                                                                                                                                                                                                                                                                                                                                         |
| Santos 2015 [16]  | 38 patients with CS (15 active, 23 in remission), 38 controls                                                             | Volumetric MRI        | Patients in remission had more white matter lesions than controls and active patients. Both CS groups had reduced total brain volume and GMV. No differences were found in white matter volume.                                                                                                                                                                                                                                                                                                                                                                                                                                                    |

|                         |                                                                                                                        |                |                                                                                                                                                                                                                                                                                                                                                                                                                                                                                                                                                                                                                                                                                                                                                                                                                                                                |
|-------------------------|------------------------------------------------------------------------------------------------------------------------|----------------|----------------------------------------------------------------------------------------------------------------------------------------------------------------------------------------------------------------------------------------------------------------------------------------------------------------------------------------------------------------------------------------------------------------------------------------------------------------------------------------------------------------------------------------------------------------------------------------------------------------------------------------------------------------------------------------------------------------------------------------------------------------------------------------------------------------------------------------------------------------|
| Santos 2017 [17]        | 39 patients with CS (16 active, 23 in remission), 39 healthy controls                                                  | Volumetric MRI | Active CS patients had smaller right amygdala volumes. Left amygdala volume was associated with depression and anxiety scores. No differences were found between patients in remission and controls.                                                                                                                                                                                                                                                                                                                                                                                                                                                                                                                                                                                                                                                           |
| Simmons 2000 [18]       | 63 patients with CD (all after surgical treatment), 63 controls with sellar pathology other than ACTH-secreting tumors | Volumetric MRI | CD patients had higher degrees of cerebral atrophy than controls.                                                                                                                                                                                                                                                                                                                                                                                                                                                                                                                                                                                                                                                                                                                                                                                              |
| Starkman 1992 [19]      | 12 patients with CS                                                                                                    | Volumetric MRI | For 27% of patients, hippocampal volume fell outside the 95% confidence interval of the population. Plasma cortisol was negatively correlated with hippocampal volume.                                                                                                                                                                                                                                                                                                                                                                                                                                                                                                                                                                                                                                                                                         |
| Starkman 1999 [20]      | 22 patients with active CD                                                                                             | Volumetric MRI | Sixteen months after TSS, hippocampus volume increased up to 10%, and a smaller increase was observed in caudate volume.                                                                                                                                                                                                                                                                                                                                                                                                                                                                                                                                                                                                                                                                                                                                       |
| Starkman 2003 [21]      | 24 patients with active CD                                                                                             | Volumetric MRI | Sixteen months after TSS, all patients showed an increase in hippocampal volume (which was significantly correlated with lower cortisol levels, and with one neuropsychological test), and 18 patients had an increase in caudate head volume.                                                                                                                                                                                                                                                                                                                                                                                                                                                                                                                                                                                                                 |
| Tirosch 2020 [22]       | 29 patients with CS (8 active, 21 recovering), 8 controls                                                              | Volumetric MRI | Patients with persistent disease had increased white matter volume and decreased cortex thickness and white matter intensity compared with patients achieving remission of CS, mainly in frontal and parietal lobes (but not FDR-corrected). Compared to healthy controls, patients recovering from CS had a decrease in subcortical GM volume, an increase in cortical thickness, and a decrease in white matter volume in multiple sites (including accumbens). In all patients together, 24h UFC correlated negatively with intensity in caudate, hippocampus, accumbens, and corpus callosum; correlated negatively with white matter intensity in frontal and parietal lobes; and positively with lateral ventricles volumes. Changes in 24h UFC correlated negatively with change in total brain volume, supratentorium, cerebellar cortex, and putamen. |
| Toffanin 2011 [23]      | 10 patients with active CD                                                                                             | Volumetric MRI | After TSS, the volume of the hippocampal head increased significantly, but no change in hippocampal body or tail, nor in whole brain volume was observed.                                                                                                                                                                                                                                                                                                                                                                                                                                                                                                                                                                                                                                                                                                      |
| Van der Werff 2014 [24] | 22 patients with long-term remission of CD, 22 healthy controls                                                        | DTI            | Patients had widespread FA reductions in whole brain analysis. ROI analysis revealed reduced FA in the bilateral cingulate cingulum, bilateral uncinate fasciculus and corpus callosum. No significant differences were found in tracts in the inferior parts of the brainstem, the white matter in the bilateral cerebellum, the bilateral hippocampal cingulum, the left inferior fronto-occipital fasciculus, and parts of the bilateral superior longitudinal fasciculus. Patients also had increased radial and mean diffusivity, but no difference in axial diffusivity.                                                                                                                                                                                                                                                                                 |

| Exogenous GC      |                                                                                                                                                                                                                         |                      |                                                                                                                                                                                                                                                                                                                                                                       |
|-------------------|-------------------------------------------------------------------------------------------------------------------------------------------------------------------------------------------------------------------------|----------------------|-----------------------------------------------------------------------------------------------------------------------------------------------------------------------------------------------------------------------------------------------------------------------------------------------------------------------------------------------------------------------|
| Bentson 1978 [25] | 15 long-term GC users                                                                                                                                                                                                   | CT                   | Patients showed varying degrees of apparent cerebral atrophy. Some correlation between dosage and degree of atrophy appeared to be present.                                                                                                                                                                                                                           |
| Brown 2004 [26]   | 17 chronic (>6 months) GC (prednisone) users, 15 controls                                                                                                                                                               | Volumetric MRI, PMRS | GC users had smaller hippocampal volume, lower N-acetyl aspartate ratios, more mood symptoms and poorer cognitive function.                                                                                                                                                                                                                                           |
| Brown 2015 [27]   | 17 healthy adults who received hydrocortisone (160 mg/day)/placebo, phenytoin/placebo, hydrocortisone/phenytoin, or placebo/placebo, in a randomized, blinded, cross-over trial with 21-day washout between conditions. | Volumetric MRI       | Hydrocortisone use was not associated with difference in total brain volume but was associated with a 1.69% reduction in total hippocampal volume compared to placebo. Phenytoin blocked this hippocampal volume reduction by hydrocortisone.                                                                                                                         |
| Brown 2019 [28]   | 46 chronic GC users, randomized to memantine or placebo in blinded, cross-over trial (two 24-week treatment periods, separated by four-week washout)                                                                    | Volumetric MRI       | Hippocampal volume decreased significantly from baseline to week 52 and from week 24 to week 52, without significant difference between baseline and week 24. Following 24 weeks of memantine, left dentate gyrus/CA3 volume was significantly larger than after placebo; a similar trend was observed in the right CA1. Subiculum showed no significant differences. |
| Brown 2008 [29]   | 15 chronic (>6 months) GC (prednisone) users, 13 controls                                                                                                                                                               | Volumetric MRI       | GC users had significantly smaller amygdala volumes compared to controls. Duration of GC therapy correlated negatively with right amygdala volume.                                                                                                                                                                                                                    |
| Desai 2009 [30]   | 28 chronic (>6 months) GC (prednisone) users, randomized to 24 weeks of lamotrigine (n = 16) or placebo (n = 12) in blinded trial                                                                                       | Volumetric MRI       | After 24 weeks, amygdala volume was reduced in both groups, but right amygdala volume was significantly less reduced in the lamotrigine group than in the placebo group.                                                                                                                                                                                              |
| Nguyn 2019 [31]   | 81 chronic (>6 months) GC (prednisone) users                                                                                                                                                                            | Volumetric MRI       | Cumulative GC exposure negatively associated with the volumes of the left and right hippocampal dentate gyrus/CA3; no associations were found for entorhinal, perirhinal, or parahippocampal gyri, subiculum, or CA1.                                                                                                                                                 |

AD, axial diffusivity; ACC, anterior cingulate cortex; CD, Cushing disease; CS, Cushing syndrome; CT, computed tomography; FA, fractional anisotropy; DKI, diffusional kurtosis imaging; DMN, default mode network; GC, glucocorticoids; GMV, grey matter volume; MD, mean diffusivity; MFG, medial frontal gyrus; NFA, non-functioning pituitary adenoma; PCC, posterior cingulate cortex; PMRS, proton magnetic resonance spectroscopy; RD, radial diffusivity; RSFC, resting-state functional connectivity; TSS, transsphenoidal surgery; 24h UFC, 24-hour urinary free cortisol.

## References

1. Andela, C.D., van der Werff, S.J., Pannekoek, J.N., van den Berg, S.M., Meijer, O.C., van Buchem, M.A., Rombouts, S.A., van der Mast, R.C., Romijn, J.A., Tiemensma, J., Biermasz, N.R., van der Wee, N.J., Pereira, A.M.: Smaller grey matter volumes in the anterior cingulate cortex and greater cerebellar volumes in patients with long-term remission of Cushing's disease: a case-control study. *Eur J Endocrinol* **169**(6), 811-819 (2013). doi:10.1530/eje-13-0471
2. Bauduin, S., van der Pal, Z., Pereira, A.M., Meijer, O.C., Giltay, E.J., van der Wee, N.J.A., van der Werff, S.J.A.: Cortical thickness abnormalities in long-term remitted Cushing's disease. *Transl Psychiatry* **10**(1), 293 (2020). doi:10.1038/s41398-020-00980-6
3. Bourdeau, I., Bard, C., Noël, B., Leclerc, I., Cordeau, M.P., Bélair, M., Lesage, J., Lafontaine, L., Lacroix, A.: Loss of brain volume in endogenous Cushing's syndrome and its reversibility after correction of hypercortisolism. *J Clin Endocrinol Metab* **87**(5), 1949-1954 (2002). doi:10.1210/jcem.87.5.8493
4. Burkhardt, T., Lüdecke, D., Spies, L., Wittmann, L., Westphal, M., Flitsch, J.: Hippocampal and cerebellar atrophy in patients with Cushing's disease. *Neurosurg Focus* **39**(5), E5 (2015). doi:10.3171/2015.8.Focus15324
5. Chen, Y., Zhang, J., Tan, H., Li, J., Yu, Y.: Detrimental effects of hypercortisolism on brain structure and related risk factors. *Sci Rep* **10**(1), 12708 (2020). doi:10.1038/s41598-020-68166-0
6. Crespo, I., Esther, G.M., Santos, A., Valassi, E., Yolanda, V.G., De Juan-Delago, M., Webb, S.M., Gómez-Ansón, B., Resmini, E.: Impaired decision-making and selective cortical frontal thinning in Cushing's syndrome. *Clinical endocrinology* **81**(6), 826-833 (2014).
7. Hou, B., Gao, L., Shi, L., Luo, Y., Guo, X., Young, G.S., Qin, L., Zhu, H., Lu, L., Wang, Z., Feng, M., Bao, X., Wang, R., Xing, B., Feng, F.: Reversibility of impaired brain structures after transsphenoidal surgery in Cushing's disease: a longitudinal study based on an artificial intelligence-assisted tool. *J Neurosurg*, 1-10 (2020). doi:10.3171/2019.10.Jns191400
8. Jiang, H., Ren, J., He, N.Y., Liu, C., Sun, Y.H., Jian, F.F., Bian, L.G., Shen, J.K., Yan, F.H., Pan, S.J., Sun, Q.F.: Volumetric magnetic resonance imaging analysis in patients with short-term remission of Cushing's disease. *Clin Endocrinol (Oxf)* **87**(4), 367-374 (2017). doi:10.1111/cen.13381
9. Jiang, H., He, N.Y., Sun, Y.H., Jian, F.F., Bian, L.G., Shen, J.K., Yan, F.H., Pan, S.J., Sun, Q.F.: Altered gray and white matter microstructure in Cushing's disease: A diffusional kurtosis imaging study. *Brain Res* **1665**, 80-87 (2017). doi:10.1016/j.brainres.2017.04.007
10. Merke, D.P., Giedd, J.N., Keil, M.F., Mehlinger, S.L., Wiggs, E.A., Holzer, S., Rawson, E., Vaituzis, A.C., Stratakis, C.A., Chrousos, G.P.: Children experience cognitive decline despite reversal of brain atrophy one year after resolution of Cushing syndrome. *J Clin Endocrinol Metab* **90**(5), 2531-2536 (2005). doi:10.1210/jc.2004-2488
11. Momose, K.J., Kjellberg, R.N., Kliman, B.: High incidence of cortical atrophy of the cerebral and cerebellar hemispheres in Cushing's disease. *Radiology* **99**(2), 341-348 (1971). doi:10.1148/99.2.341
12. Pires, P., Santos, A., Vives-Gilabert, Y., Webb, S.M., Sainz-Ruiz, A., Resmini, E., Crespo, I., de Juan-Delago, M., Gómez-Anson, B.: White matter alterations in the brains of patients with active, remitted, and cured cushing syndrome: a DTI study. *AJNR Am J Neuroradiol* **36**(6), 1043-1048 (2015). doi:10.3174/ajnr.A4322



13. Pires, P., Santos, A., Vives-Gilabert, Y., Webb, S.M., Sainz-Ruiz, A., Resmini, E., Crespo, I., de Juan-Delago, M., Gómez-Anson, B.: White matter involvement on DTI-MRI in Cushing's syndrome relates to mood disturbances and processing speed: a case-control study. *Pituitary* **20**(3), 340-348 (2017). doi:10.1007/s11102-017-0793-y
14. Resmini, E., Santos, A., Gómez-Anson, B., Vives, Y., Pires, P., Crespo, I., Portella, M.J., de Juan-Delago, M., Barahona, M.J., Webb, S.M.: Verbal and visual memory performance and hippocampal volumes, measured by 3-Tesla magnetic resonance imaging, in patients with Cushing's syndrome. *J Clin Endocrinol Metab* **97**(2), 663-671 (2012). doi:10.1210/jc.2011-2231
15. Santos, A., Resmini, E., Crespo, I., Pires, P., Vives-Gilabert, Y., Granell, E., Valassi, E., Gómez-Anson, B., Martínez-Momblán, M.A., Mataró, M., Webb, S.M.: Small cerebellar cortex volume in patients with active Cushing's syndrome. *Eur J Endocrinol* **171**(4), 461-469 (2014). doi:10.1530/eje-14-0371
16. Santos, A., Resmini, E., Gómez-Ansón, B., Crespo, I., Granell, E., Valassi, E., Pires, P., Vives-Gilabert, Y., Martínez-Momblán, M.A., de Juan, M., Mataró, M., Webb, S.M.: Cardiovascular risk and white matter lesions after endocrine control of Cushing's syndrome. *Eur J Endocrinol* **173**(6), 765-775 (2015). doi:10.1530/eje-15-0600
17. Santos, A., Granell, E., Gómez-Ansón, B., Crespo, I., Pires, P., Vives-Gilabert, Y., Valassi, E., Webb, S.M., Resmini, E.: Depression and Anxiety Scores Are Associated with Amygdala Volume in Cushing's Syndrome: Preliminary Study. *Biomed Res Int* **2017**, 2061935 (2017). doi:10.1155/2017/2061935
18. Simmons, N.E., Do, H.M., Lipper, M.H., Laws, E.R., Jr.: Cerebral atrophy in Cushing's disease. *Surg Neurol* **53**(1), 72-76 (2000). doi:10.1016/s0090-3019(99)00197-4
19. Starkman, M.N., Gebarski, S.S., Berent, S., Schteingart, D.E.: Hippocampal formation volume, memory dysfunction, and cortisol levels in patients with Cushing's syndrome. *Biological psychiatry* **32**(9), 756-765 (1992).
20. Starkman, M.N., Giordani, B., Gebarski, S.S., Berent, S., Schork, M.A., Schteingart, D.E.: Decrease in cortisol reverses human hippocampal atrophy following treatment of Cushing's disease. *Biol Psychiatry* **46**(12), 1595-1602 (1999). doi:10.1016/s0006-3223(99)00203-6
21. Starkman, M.N., Giordani, B., Gebarski, S.S., Schteingart, D.E.: Improvement in learning associated with increase in hippocampal formation volume. *Biol Psychiatry* **53**(3), 233-238 (2003). doi:10.1016/s0006-3223(02)01750-x
22. Tirosh, A., RaviPrakash, H., Papadakis, G.Z., Tatsi, C., Belyavskaya, E., Charalampos, L., Lodish, M.B., Bagci, U., Stratakis, C.A.: Computerized Analysis of Brain MRI Parameter Dynamics in Young Patients With Cushing Syndrome-A Case-Control Study. *J Clin Endocrinol Metab* **105**(5), e2069-2077 (2020). doi:10.1210/clinem/dgz303
23. Toffanin, T., Nifosi, F., Follador, H., Passamani, A., Zonta, F., Ferri, G., Scanarini, M., Amistà, P., Pigato, G., Scaroni, C., Mantero, F., Carollo, C., Perini, G.I.: Volumetric MRI analysis of hippocampal subregions in Cushing's disease: a model for glucocorticoid neural modulation. *Eur Psychiatry* **26**(1), 64-67 (2011). doi:10.1016/j.eurpsy.2010.09.003
24. van der Werff, S.J., Andela, C.D., Nienke Pannekoek, J., Meijer, O.C., van Buchem, M.A., Rombouts, S.A., van der Mast, R.C., Biermasz, N.R., Pereira, A.M., van der Wee, N.J.: Widespread reductions of white matter integrity in patients with long-term remission of Cushing's disease. *Neuroimage Clin* **4**, 659-667 (2014). doi:10.1016/j.nicl.2014.01.017
25. Bentson, J., Reza, M., Winter, J., Wilson, G.: Steroids and apparent cerebral atrophy on computed tomography scans. *J Comput Assist Tomogr* **2**(1), 16-23 (1978). doi:10.1097/00004728-197801000-00003

- 1  
2  
3 26. Brown, E.S., D, J.W., Frol, A., Bobadilla, L., Khan, D.A., Hanczyc, M., Rush, A.J., Fleckenstein, J., Babcock, E., Cullum, C.M.: Hippocampal volume,  
4 spectroscopy, cognition, and mood in patients receiving corticosteroid therapy. *Biol Psychiatry* **55**(5), 538-545 (2004).  
5 doi:10.1016/j.biopsych.2003.09.010  
6  
7 27. Brown, E.S., Jeon-Slaughter, H., Lu, H., Jamadar, R., Issac, S., Shad, M., Denniston, D., Tamminga, C., Nakamura, A., Thomas, B.P.: Hippocampal volume in  
8 healthy controls given 3-day stress doses of hydrocortisone. *Neuropsychopharmacology* **40**(5), 1216-1221 (2015). doi:10.1038/npp.2014.307  
9  
10 28. Brown, E.S., Kulikova, A., Van Enkevort, E., Nakamura, A., Ivleva, E.I., Tustison, N.J., Roberts, J., Yassa, M.A., Choi, C., Frol, A., Khan, D.A., Vazquez, M.,  
11 Holmes, T., Malone, K.: A randomized trial of an NMDA receptor antagonist for reversing corticosteroid effects on the human hippocampus.  
12 *Neuropsychopharmacology* **44**(13), 2263-2267 (2019). doi:10.1038/s41386-019-0430-8  
13  
14 29. Brown, E.S., Woolston, D.J., Frol, A.B.: Amygdala volume in patients receiving chronic corticosteroid therapy. *Biol Psychiatry* **63**(7), 705-709 (2008).  
15 doi:10.1016/j.biopsych.2007.09.014  
16  
17 30. Desai, S., Khanani, S., Shad, M.U., Brown, E.S.: Attenuation of amygdala atrophy with lamotrigine in patients receiving corticosteroid therapy. *J Clin*  
18 *Psychopharmacol* **29**(3), 284-287 (2009). doi:10.1097/JCP.0b013e3181a3e2a7  
19  
20 31. Nguyen, D.M., Yassa, M.A., Tustison, N.J., Roberts, J.M., Kulikova, A., Nakamura, A., Ivleva, E.I., Van Enkevort, E., Brown, E.S.: The Relationship Between  
21 Cumulative Exogenous Corticosteroid Exposure and Volumes of Hippocampal Subfields and Surrounding Structures. *J Clin Psychopharmacol* **39**(6),  
22 653-657 (2019). doi:10.1097/jcp.0000000000001120  
23  
24  
25  
26  
27  
28  
29  
30  
31  
32  
33  
34  
35  
36  
37  
38  
39  
40  
41  
42  
43  
44  
45  
46

| Abbreviation | Meaning                                   |
|--------------|-------------------------------------------|
| GC           | Glucocorticoids                           |
| FDR          | False discovery rate                      |
| Lower CI     | Lower end of the 95% confidence interval  |
| Upper        | Higher end of the 95% confidence interval |

For peer review only

1  
2 Post-hoc tests of demographic variables  
3  
45 ANOVA of continuous demc  
6

|                                              |                     | F value | P value |
|----------------------------------------------|---------------------|---------|---------|
| <u>Main population</u>                       | Age                 | 13.0    | 2.4E-06 |
|                                              | BMI                 | 5.8     | 2.9E-03 |
|                                              | Body fat percentage | 15.3    | 2.2E-07 |
| <u>Chronic users</u>                         | Body fat percentage | 7.7     | 4.6E-04 |
| <u>Population without exclusion criteria</u> | Age                 | 21.8    | 3.6E-10 |
|                                              | BMI                 | 8.4     | 2.2E-04 |
|                                              | Body fat percentage | 14.4    | 5.5E-07 |

ographic variablesPost-hoc Dunnett's testSystemic GC vs. controls

| Estimate | Lower CI | Upper CI | P value |
|----------|----------|----------|---------|
| 2.6      | 1.4      | 3.7      | <.0001  |
| 0.03     | -0.6     | 0.7      | 0.98    |
| 0.7      | -0.5     | 1.9      | 0.36    |
| -0.2     | -3.0     | 2.6      | 0.97    |
| 2.4      | 1.5      | 3.4      | <.0001  |
| 0.2      | -0.4     | 0.7      | 0.67    |
| 0.8      | -0.2     | 1.8      | 0.16    |

For peer review only

**Inhaled GC vs. controls**

| <b>Estimate</b> | <b>Lower CI</b> | <b>Upper CI</b> | <b>P value</b>   |
|-----------------|-----------------|-----------------|------------------|
| -0.2            | -0.9            | 0.5             | 0.81             |
| 0.6             | 0.2             | 1.0             | <b>1.3E-03</b>   |
| 1.9             | 1.1             | 2.7             | <b>&lt;.0001</b> |
| 1.8             | 0.8             | 2.9             | <b>2.0E-04</b>   |
| -0.9            | -1.5            | -0.3            | <b>2.0E-03</b>   |
| 0.6             | 0.3             | 1.0             | <b>1.0E-04</b>   |
| 1.5             | 0.9             | 2.2             | <b>&lt;.0001</b> |

## Primary comparison: systemic GC / inhaled GC vs. controls

ANOVA of imaging parameters

|                                     | F value | P value | P_FDR          |
|-------------------------------------|---------|---------|----------------|
| <b>Volumetric measures</b>          |         |         |                |
| <b>Global volumes</b>               |         |         |                |
| Total brain volume                  | 19.7    | 2.8E-09 | <b>2.0E-08</b> |
| Grey matter volume                  | 23.7    | 5.4E-11 | <b>6.5E-10</b> |
| White matter volume                 | 6.7     | 1.2E-03 | <b>2.0E-03</b> |
| Peripheral cortex                   | 21.1    | 6.9E-10 | <b>6.2E-09</b> |
| CSF volume                          | 10.1    | 4.2E-05 | <b>9.5E-05</b> |
| <b>Subcortical volumes</b>          |         |         |                |
| Accumbens                           | 12.0    | 6.0E-06 | <b>1.7E-05</b> |
| Amygdala                            | 3.1     | 4.4E-02 | 5.4E-02        |
| Caudate                             | 6.7     | 1.3E-03 | <b>2.0E-03</b> |
| Hippocampus                         | 2.5     | 8.0E-02 | 8.7E-02        |
| Pallidum                            | 7.7     | 4.5E-04 | <b>7.8E-04</b> |
| Putamen                             | 10.9    | 1.8E-05 | <b>4.6E-05</b> |
| Thalamus                            | 8.2     | 2.7E-04 | <b>4.9E-04</b> |
| <b>Regional grey matter volumes</b> |         |         |                |
| Amygdala                            | 23.8    | 5.0E-11 | <b>6.5E-10</b> |
| Caudate                             | 13.0    | 2.3E-06 | <b>7.5E-06</b> |
| Cerebellum                          | 10.8    | 2.0E-05 | <b>4.8E-05</b> |
| Cingulate gyrus, anterior           | 2.6     | 7.4E-02 | 8.3E-02        |
| Cingulate gyrus, posterior          | 1.2     | 3.1E-01 | 3.2E-01        |
| Cuneal cortex                       | 2.4     | 9.1E-02 | 9.6E-02        |
| Hippocampus                         | 2.7     | 6.8E-02 | 7.9E-02        |
| Insular cortex                      | 8.5     | 2.0E-04 | <b>3.9E-04</b> |
| Medial frontal gyrus                | 0.5     | 6.1E-01 | 6.1E-01        |
| Precuneal cortex                    | 5.5     | 4.3E-03 | <b>5.6E-03</b> |
| <b>DTI measures</b>                 |         |         |                |
| <b>Fractional anisotropy</b>        |         |         |                |
| Global                              | 19.2    | 4.6E-09 | <b>2.8E-08</b> |
| Body of corpus callosum             | 10.0    | 4.7E-05 | <b>1.0E-04</b> |
| Genu of corpus callosum             | 16.8    | 5.3E-08 | <b>2.1E-07</b> |
| Splenium of corpus callosum         | 5.4     | 4.4E-03 | <b>5.6E-03</b> |
| Cingulum cingulate                  | 6.1     | 2.4E-03 | <b>3.4E-03</b> |
| Cingulum hippocampus                | 6.4     | 1.7E-03 | <b>2.5E-03</b> |
| Uncinate                            | 2.8     | 6.1E-02 | 7.3E-02        |
| <b>Mean diffusivity</b>             |         |         |                |
| Global                              | 25.9    | 5.8E-12 | <b>2.1E-10</b> |
| Body of corpus callosum             | 15.5    | 2.0E-07 | <b>7.0E-07</b> |
| Genu of corpus callosum             | 18.0    | 1.6E-08 | <b>7.0E-08</b> |
| Splenium of corpus callosum         | 9.7     | 6.2E-05 | <b>1.2E-04</b> |
| Cingulum cingulate                  | 5.4     | 4.3E-03 | <b>5.6E-03</b> |

|    |                      |      |         |                |
|----|----------------------|------|---------|----------------|
| 1  |                      |      |         |                |
| 2  | Cingulum hippocampus | 18.5 | 9.1E-09 | <b>4.7E-08</b> |
| 3  | Uncinate             | 12.1 | 5.4E-06 | <b>1.6E-05</b> |
| 4  |                      |      |         |                |
| 5  |                      |      |         |                |
| 6  |                      |      |         |                |
| 7  |                      |      |         |                |
| 8  |                      |      |         |                |
| 9  |                      |      |         |                |
| 10 |                      |      |         |                |
| 11 |                      |      |         |                |
| 12 |                      |      |         |                |
| 13 |                      |      |         |                |
| 14 |                      |      |         |                |
| 15 |                      |      |         |                |
| 16 |                      |      |         |                |
| 17 |                      |      |         |                |
| 18 |                      |      |         |                |
| 19 |                      |      |         |                |
| 20 |                      |      |         |                |
| 21 |                      |      |         |                |
| 22 |                      |      |         |                |
| 23 |                      |      |         |                |
| 24 |                      |      |         |                |
| 25 |                      |      |         |                |
| 26 |                      |      |         |                |
| 27 |                      |      |         |                |
| 28 |                      |      |         |                |
| 29 |                      |      |         |                |
| 30 |                      |      |         |                |
| 31 |                      |      |         |                |
| 32 |                      |      |         |                |
| 33 |                      |      |         |                |
| 34 |                      |      |         |                |
| 35 |                      |      |         |                |
| 36 |                      |      |         |                |
| 37 |                      |      |         |                |
| 38 |                      |      |         |                |
| 39 |                      |      |         |                |
| 40 |                      |      |         |                |
| 41 |                      |      |         |                |
| 42 |                      |      |         |                |
| 43 |                      |      |         |                |
| 44 |                      |      |         |                |
| 45 |                      |      |         |                |
| 46 |                      |      |         |                |
| 47 |                      |      |         |                |
| 48 |                      |      |         |                |
| 49 |                      |      |         |                |
| 50 |                      |      |         |                |
| 51 |                      |      |         |                |
| 52 |                      |      |         |                |
| 53 |                      |      |         |                |
| 54 |                      |      |         |                |
| 55 |                      |      |         |                |
| 56 |                      |      |         |                |
| 57 |                      |      |         |                |
| 58 |                      |      |         |                |
| 59 |                      |      |         |                |
| 60 |                      |      |         |                |

For peer review only



1  
2  
3  
4  
5  
6  
7  
8  
9  
10  
11  
12  
13  
14  
15  
16  
17  
18  
19  
20  
21  
22  
23  
24  
25  
26  
27  
28  
29  
30  
31  
32  
33  
34  
35  
36  
37  
38  
39  
40  
41  
42  
43  
44  
45  
46  
47  
48  
49  
50  
51  
52  
53  
54  
55  
56  
57  
58  
59  
60

| <u>Post-hoc Dunnett's test</u>  |          |          |                |  |                      |
|---------------------------------|----------|----------|----------------|--|----------------------|
| <u>Systemic GC vs. controls</u> |          |          |                |  | <u>Inhaled GC vs</u> |
| Estimate                        | Lower CI | Upper CI | P value        |  | Estimate             |
| -3688                           | -10627   | 3252     | 0.39           |  | 3374                 |
| -1968                           | -5904    | 1968     | 0.44           |  | 1012                 |
| -1720                           | -6273    | 2833     | 0.61           |  | 2362                 |
| -3303                           | -6843    | 237      | 0.072          |  | 1033                 |
| 1215                            | -824     | 3254     | 0.32           |  | 78                   |
| -13.1                           | -26.7    | 0.5      | 0.062          |  | -6.5                 |
| 77.8                            | 24.5     | 131.1    | <b>2.3E-03</b> |  | -2.7                 |
| 0.8                             | -29.9    | 31.4     | 1.00           |  | -18.0                |
| -31.3                           | -98.2    | 35.6     | 0.48           |  | -27.9                |
| 3.6                             | -74.0    | 81.1     | 0.99           |  | -6.4                 |
| -4.0                            | -31.9    | 23.8     | 0.91           |  | -23.9                |
| 178.7                           | 82.2     | 275.0    | <b>1.0E-04</b> |  | 41.2                 |
| 25.1                            | -18.4    | 68.5     | 0.34           |  | -12.2                |
| -36.2                           | -108.4   | 36.0     | 0.43           |  | 5.0                  |
| -21.5                           | -179.0   | 136.3    | 0.92           |  | -7.4                 |
| -0.0037                         | -0.0064  | -0.0010  | <b>4.2E-03</b> |  | -0.0023              |
| -0.0043                         | -0.0084  | -1.2E-04 | <b>0.043</b>   |  | -0.0023              |
| -0.0064                         | -0.011   | -0.0017  | <b>5.0E-03</b> |  | -0.0019              |
| -0.0021                         | -0.0053  | 0.0012   | 0.27           |  | -0.0032              |
| -0.0017                         | -0.0062  | 0.0028   | 0.61           |  | -0.0028              |
| 6.5E-05                         | -0.0046  | 0.0048   | 1.00           |  | -0.0034              |
| 7.2E-06                         | 3.2E-06  | 1.1E-05  | <b>1.0E-04</b> |  | 2.7E-06              |
| 6.9E-06                         | 1.7E-06  | 1.2E-05  | <b>6.0E-03</b> |  | 4.8E-06              |
| 8.4E-06                         | 2.2E-06  | 1.5E-05  | <b>4.9E-03</b> |  | 4.1E-06              |
| 4.4E-06                         | -3.8E-08 | 8.9E-06  | 5.2E-02        |  | 5.3E-06              |
| 2.9E-06                         | -8.5E-07 | 6.6E-06  | 1.6E-01        |  | 2.8E-06              |

|    |         |         |         |                |         |
|----|---------|---------|---------|----------------|---------|
| 1  |         |         |         |                |         |
| 2  | 5.0E-06 | 4.2E-07 | 9.5E-06 | <b>2.9E-02</b> | 5.6E-06 |
| 3  | 6.4E-06 | 2.2E-06 | 1.1E-05 | <b>1.4E-03</b> | 2.2E-06 |
| 4  |         |         |         |                |         |
| 5  |         |         |         |                |         |
| 6  |         |         |         |                |         |
| 7  |         |         |         |                |         |
| 8  |         |         |         |                |         |
| 9  |         |         |         |                |         |
| 10 |         |         |         |                |         |
| 11 |         |         |         |                |         |
| 12 |         |         |         |                |         |
| 13 |         |         |         |                |         |
| 14 |         |         |         |                |         |
| 15 |         |         |         |                |         |
| 16 |         |         |         |                |         |
| 17 |         |         |         |                |         |
| 18 |         |         |         |                |         |
| 19 |         |         |         |                |         |
| 20 |         |         |         |                |         |
| 21 |         |         |         |                |         |
| 22 |         |         |         |                |         |
| 23 |         |         |         |                |         |
| 24 |         |         |         |                |         |
| 25 |         |         |         |                |         |
| 26 |         |         |         |                |         |
| 27 |         |         |         |                |         |
| 28 |         |         |         |                |         |
| 29 |         |         |         |                |         |
| 30 |         |         |         |                |         |
| 31 |         |         |         |                |         |
| 32 |         |         |         |                |         |
| 33 |         |         |         |                |         |
| 34 |         |         |         |                |         |
| 35 |         |         |         |                |         |
| 36 |         |         |         |                |         |
| 37 |         |         |         |                |         |
| 38 |         |         |         |                |         |
| 39 |         |         |         |                |         |
| 40 |         |         |         |                |         |
| 41 |         |         |         |                |         |
| 42 |         |         |         |                |         |
| 43 |         |         |         |                |         |
| 44 |         |         |         |                |         |
| 45 |         |         |         |                |         |
| 46 |         |         |         |                |         |
| 47 |         |         |         |                |         |
| 48 |         |         |         |                |         |
| 49 |         |         |         |                |         |
| 50 |         |         |         |                |         |
| 51 |         |         |         |                |         |
| 52 |         |         |         |                |         |
| 53 |         |         |         |                |         |
| 54 |         |         |         |                |         |
| 55 |         |         |         |                |         |
| 56 |         |         |         |                |         |
| 57 |         |         |         |                |         |
| 58 |         |         |         |                |         |
| 59 |         |         |         |                |         |
| 60 |         |         |         |                |         |

For peer review only

vs. controls

|  | Lower CI | Upper CI | P value        |
|--|----------|----------|----------------|
|  | -1012    | 7760     | 0.16           |
|  | -1476    | 3500     | 0.57           |
|  | -516     | 5240     | 0.13           |
|  | -1205    | 3270     | 0.49           |
|  | -1211    | 1367     | 0.98           |
|  | -15.1    | 2.1      | 0.17           |
|  | -36.4    | 30.9     | 0.97           |
|  | -37.3    | 1.42     | 0.074          |
|  | -70.2    | 14.4     | 0.25           |
|  | -55.4    | 42.6     | 0.93           |
|  | -41.5    | -6.2     |                |
|  | -19.8    | 102.0    |                |
|  | -39.7    | 15.3     |                |
|  | -40.6    | 50.7     |                |
|  | -107.0   | 92.4     |                |
|  | -0.0040  | -5.7E-04 | <b>5.7E-03</b> |
|  | -0.0049  | 3.0E-04  | 0.092          |
|  | -0.0049  | 0.0011   | 0.27           |
|  | -0.0052  | -0.0012  | <b>1.0E-03</b> |
|  | -0.0057  | 8.9E-06  | 0.051          |
|  | -0.0063  | -3.8E-04 | <b>0.024</b>   |
|  | 1.7E-07  | 5.2E-06  | <b>3.4E-02</b> |
|  | 1.6E-06  | 8.1E-06  | <b>2.0E-03</b> |
|  | 1.7E-07  | 8.0E-06  | <b>3.9E-02</b> |
|  | 2.4E-06  | 8.1E-06  | <b>1.0E-04</b> |
|  | 4.7E-07  | 5.2E-06  | <b>1.5E-02</b> |

|    |          |         |                  |
|----|----------|---------|------------------|
| 1  |          |         |                  |
| 2  | 2.8E-06  | 8.5E-06 | <b>&lt;.0001</b> |
| 3  | -4.4E-07 | 4.9E-06 | 1.2E-01          |
| 4  |          |         |                  |
| 5  |          |         |                  |
| 6  |          |         |                  |
| 7  |          |         |                  |
| 8  |          |         |                  |
| 9  |          |         |                  |
| 10 |          |         |                  |
| 11 |          |         |                  |
| 12 |          |         |                  |
| 13 |          |         |                  |
| 14 |          |         |                  |
| 15 |          |         |                  |
| 16 |          |         |                  |
| 17 |          |         |                  |
| 18 |          |         |                  |
| 19 |          |         |                  |
| 20 |          |         |                  |
| 21 |          |         |                  |
| 22 |          |         |                  |
| 23 |          |         |                  |
| 24 |          |         |                  |
| 25 |          |         |                  |
| 26 |          |         |                  |
| 27 |          |         |                  |
| 28 |          |         |                  |
| 29 |          |         |                  |
| 30 |          |         |                  |
| 31 |          |         |                  |
| 32 |          |         |                  |
| 33 |          |         |                  |
| 34 |          |         |                  |
| 35 |          |         |                  |
| 36 |          |         |                  |
| 37 |          |         |                  |
| 38 |          |         |                  |
| 39 |          |         |                  |
| 40 |          |         |                  |
| 41 |          |         |                  |
| 42 |          |         |                  |
| 43 |          |         |                  |
| 44 |          |         |                  |
| 45 |          |         |                  |
| 46 |          |         |                  |
| 47 |          |         |                  |
| 48 |          |         |                  |
| 49 |          |         |                  |
| 50 |          |         |                  |
| 51 |          |         |                  |
| 52 |          |         |                  |
| 53 |          |         |                  |
| 54 |          |         |                  |
| 55 |          |         |                  |
| 56 |          |         |                  |
| 57 |          |         |                  |
| 58 |          |         |                  |
| 59 |          |         |                  |
| 60 |          |         |                  |

For peer review only

## Subanalysis: chronic systemic GC / chronic inhaled GC vs. controls

ANOVA of imaging parameters

|                                     | F value | P value | P_FDR          |
|-------------------------------------|---------|---------|----------------|
| <b>Volumetric measures</b>          |         |         |                |
| <b>Global volumes</b>               |         |         |                |
| Total brain volume                  | 17.0    | 4.1E-08 | <b>1.5E-06</b> |
| Grey matter volume                  | 12.2    | 5.0E-06 | <b>9.1E-05</b> |
| White matter volume                 | 10.8    | 2.0E-05 | <b>1.8E-04</b> |
| Peripheral cortex                   | 8.5     | 2.1E-04 | <b>9.4E-04</b> |
| CSF volume                          | 3.0     | 5.2E-02 | <b>7.4E-02</b> |
| <b>Subcortical volumes</b>          |         |         |                |
| Accumbens                           | 0.4     | 7.0E-01 | 7.1E-01        |
| Amygdala                            | 5.8     | 2.9E-03 | <b>8.2E-03</b> |
| Caudate                             | 7.2     | 7.6E-04 | <b>2.9E-03</b> |
| Hippocampus                         | 4.9     | 7.8E-03 | <b>1.7E-02</b> |
| Pallidum                            | 7.1     | 7.9E-04 | <b>2.9E-03</b> |
| Putamen                             | 5.0     | 6.9E-03 | <b>1.6E-02</b> |
| Thalamus                            | 6.7     | 1.3E-03 | <b>4.1E-03</b> |
| <b>Regional grey matter volumes</b> |         |         |                |
| Amygdala                            | 10.1    | 4.2E-05 | <b>3.0E-04</b> |
| Caudate                             | 1.5     | 2.2E-01 | 2.4E-01        |
| Cerebellum                          | 4.1     | 1.6E-02 | <b>2.9E-02</b> |
| Cingulate gyrus, anterior           | 0.2     | 8.3E-01 | 8.3E-01        |
| Cingulate gyrus, posterior          | 4.2     | 1.6E-02 | <b>2.9E-02</b> |
| Cuneal cortex                       | 2.9     | 5.4E-02 | 7.4E-02        |
| Hippocampus                         | 9.1     | 1.1E-04 | <b>6.6E-04</b> |
| Insular cortex                      | 3.0     | 4.7E-02 | 7.1E-02        |
| Medial frontal gyrus                | 1.6     | 2.1E-01 | 2.4E-01        |
| Precuneal cortex                    | 8.6     | 1.8E-04 | <b>9.1E-04</b> |
| <b>DTI measures</b>                 |         |         |                |
| <b>Fractional anisotropy</b>        |         |         |                |
| Global                              | 5.4     | 4.4E-03 | <b>1.1E-02</b> |
| Body of corpus callosum             | 2.8     | 5.8E-02 | 7.8E-02        |
| Genu of corpus callosum             | 5.8     | 3.2E-03 | <b>8.2E-03</b> |
| Splenium of corpus callosum         | 2.7     | 6.5E-02 | 8.3E-02        |
| Cingulum cingulate                  | 2.3     | 1.0E-01 | 1.3E-01        |
| Cingulum hippocampus                | 3.7     | 2.4E-02 | <b>3.9E-02</b> |
| Uncinate                            | 1.3     | 2.7E-01 | 2.9E-01        |
| <b>Mean diffusivity</b>             |         |         |                |
| Global                              | 4.7     | 9.5E-03 | <b>1.9E-02</b> |
| Body of corpus callosum             | 3.3     | 3.6E-02 | 5.7E-02        |
| Genu of corpus callosum             | 6.3     | 1.8E-03 | <b>5.3E-03</b> |
| Splenium of corpus callosum         | 3.9     | 2.0E-02 | <b>3.5E-02</b> |
| Cingulum cingulate                  | 0.5     | 6.3E-01 | 6.7E-01        |

|    |                      |      |         |                |
|----|----------------------|------|---------|----------------|
| 1  |                      |      |         |                |
| 2  | Cingulum hippocampus | 11.6 | 9.0E-06 | <b>1.1E-04</b> |
| 3  | Uncinate             | 2.0  | 1.3E-01 | 1.6E-01        |
| 4  |                      |      |         |                |
| 5  |                      |      |         |                |
| 6  |                      |      |         |                |
| 7  |                      |      |         |                |
| 8  |                      |      |         |                |
| 9  |                      |      |         |                |
| 10 |                      |      |         |                |
| 11 |                      |      |         |                |
| 12 |                      |      |         |                |
| 13 |                      |      |         |                |
| 14 |                      |      |         |                |
| 15 |                      |      |         |                |
| 16 |                      |      |         |                |
| 17 |                      |      |         |                |
| 18 |                      |      |         |                |
| 19 |                      |      |         |                |
| 20 |                      |      |         |                |
| 21 |                      |      |         |                |
| 22 |                      |      |         |                |
| 23 |                      |      |         |                |
| 24 |                      |      |         |                |
| 25 |                      |      |         |                |
| 26 |                      |      |         |                |
| 27 |                      |      |         |                |
| 28 |                      |      |         |                |
| 29 |                      |      |         |                |
| 30 |                      |      |         |                |
| 31 |                      |      |         |                |
| 32 |                      |      |         |                |
| 33 |                      |      |         |                |
| 34 |                      |      |         |                |
| 35 |                      |      |         |                |
| 36 |                      |      |         |                |
| 37 |                      |      |         |                |
| 38 |                      |      |         |                |
| 39 |                      |      |         |                |
| 40 |                      |      |         |                |
| 41 |                      |      |         |                |
| 42 |                      |      |         |                |
| 43 |                      |      |         |                |
| 44 |                      |      |         |                |
| 45 |                      |      |         |                |
| 46 |                      |      |         |                |
| 47 |                      |      |         |                |
| 48 |                      |      |         |                |
| 49 |                      |      |         |                |
| 50 |                      |      |         |                |
| 51 |                      |      |         |                |
| 52 |                      |      |         |                |
| 53 |                      |      |         |                |
| 54 |                      |      |         |                |
| 55 |                      |      |         |                |
| 56 |                      |      |         |                |
| 57 |                      |      |         |                |
| 58 |                      |      |         |                |
| 59 |                      |      |         |                |
| 60 |                      |      |         |                |

For peer review only

1  
2  
3  
4  
5  
6  
7  
8  
9  
10  
11  
12  
13  
14  
15  
16  
17  
18  
19  
20  
21  
22  
23  
24  
25  
26  
27  
28  
29  
30  
31  
32  
33  
34  
35  
36  
37  
38  
39  
40  
41  
42  
43  
44  
45  
46  
47  
48  
49  
50  
51  
52  
53  
54  
55  
56  
57  
58  
59  
60**Post-hoc Dunnett's test****Systemic GC vs. controls****Inhaled GC vs**

| <b>Estimate</b> | <b>Lower CI</b> | <b>Upper CI</b> | <b>P value</b> | <b>Estimate</b> |
|-----------------|-----------------|-----------------|----------------|-----------------|
| -2535           | -18869          | 13798           | 0.90           | 3553            |
| -1552           | -10808          | 7703            | 0.89           | 1636            |
| -984            | -11702          | 9735            | 0.96           | 1917            |
| -2152           | -10481          | 6177            | 0.78           | 940             |
| -2408           | -7198           | 2381            | 0.43           | 154             |
| -9.9            | -42             | 22.1            | 0.49           | -1.8            |
| 52.1            | -19.3           | 123.5           | 0.19           | -20.6           |
| 112.7           | -12.9           | 238.2           | 0.09           | -5.0            |
| 59.2            | -79.1           | 197.5           | 0.54           | -38.4           |
| 4.01            | -68.2           | 76.2            | 0.98           | -23.0           |
| -65.4           | -222.8          | 92.0            | 0.55           | -26.1           |
| 61.9            | -120.7          | 244.5           | 0.66           | -11.6           |
| 4.8             | -60.8           | 70.3            | 0.97           | -15.1           |
| 79.6            | -147.1          | 306.0           | 0.65           | 57.1            |
| 25.7            | -76.5           | 127.9           | 0.79           | 4.4             |
| 36.0            | -158.8          | 230.7           | 0.87           | 25.5            |
| 63.5            | -52.4           | 179.5           | 0.37           | -24.3           |
| -110.3          | -280.0          | 59.3            | 0.26           | 34.4            |
| 170.0           | -201.0          | 541.2           | 0.49           | -59.9           |
| -0.0066         | -0.013          | -3.2E-04        | <b>0.038</b>   | -0.0025         |
| -0.0066         | -0.016          | 0.0032          | 0.24           | -0.0028         |
| -0.014          | -0.025          | -0.0031         | <b>8.7E-03</b> | -0.0020         |
| -0.0049         | -0.012          | 0.0028          | 0.27           | -0.0032         |
| 0.00033         | -0.010          | 0.0109          | 0.99           | -0.0034         |
| 0.0032          | -0.0078         | 0.014           | 0.73           | -0.0034         |
| 9.4E-06         | 8.7E-08         | 1.9E-05         | <b>0.048</b>   | 2.6E-06         |
| 1.1E-05         | -1.6E-06        | 2.3E-05         | 0.10           | 4.4E-06         |
| 2.0E-05         | 5.5E-06         | 3.5E-05         | <b>4.3E-03</b> | 2.8E-06         |
| 8.1E-06         | -2.4E-06        | 1.9E-05         | 0.16           | 5.2E-06         |
| 3.5E-06         | -5.3E-06        | 1.2E-05         | 0.58           | 2.0E-06         |

|    |         |          |         |      |         |
|----|---------|----------|---------|------|---------|
| 1  |         |          |         |      |         |
| 2  | 8.2E-06 | -2.4E-06 | 1.9E-05 | 0.16 | 6.3E-06 |
| 3  | 6.5E-06 | -3.4E-06 | 1.6E-05 | 0.25 | 2.0E-06 |
| 4  |         |          |         |      |         |
| 5  |         |          |         |      |         |
| 6  |         |          |         |      |         |
| 7  |         |          |         |      |         |
| 8  |         |          |         |      |         |
| 9  |         |          |         |      |         |
| 10 |         |          |         |      |         |
| 11 |         |          |         |      |         |
| 12 |         |          |         |      |         |
| 13 |         |          |         |      |         |
| 14 |         |          |         |      |         |
| 15 |         |          |         |      |         |
| 16 |         |          |         |      |         |
| 17 |         |          |         |      |         |
| 18 |         |          |         |      |         |
| 19 |         |          |         |      |         |
| 20 |         |          |         |      |         |
| 21 |         |          |         |      |         |
| 22 |         |          |         |      |         |
| 23 |         |          |         |      |         |
| 24 |         |          |         |      |         |
| 25 |         |          |         |      |         |
| 26 |         |          |         |      |         |
| 27 |         |          |         |      |         |
| 28 |         |          |         |      |         |
| 29 |         |          |         |      |         |
| 30 |         |          |         |      |         |
| 31 |         |          |         |      |         |
| 32 |         |          |         |      |         |
| 33 |         |          |         |      |         |
| 34 |         |          |         |      |         |
| 35 |         |          |         |      |         |
| 36 |         |          |         |      |         |
| 37 |         |          |         |      |         |
| 38 |         |          |         |      |         |
| 39 |         |          |         |      |         |
| 40 |         |          |         |      |         |
| 41 |         |          |         |      |         |
| 42 |         |          |         |      |         |
| 43 |         |          |         |      |         |
| 44 |         |          |         |      |         |
| 45 |         |          |         |      |         |
| 46 |         |          |         |      |         |
| 47 |         |          |         |      |         |
| 48 |         |          |         |      |         |
| 49 |         |          |         |      |         |
| 50 |         |          |         |      |         |
| 51 |         |          |         |      |         |
| 52 |         |          |         |      |         |
| 53 |         |          |         |      |         |
| 54 |         |          |         |      |         |
| 55 |         |          |         |      |         |
| 56 |         |          |         |      |         |
| 57 |         |          |         |      |         |
| 58 |         |          |         |      |         |
| 59 |         |          |         |      |         |
| 60 |         |          |         |      |         |

For peer review only



vs. controls

|  | Lower CI | Upper CI | P value        |
|--|----------|----------|----------------|
|  | -2340    | 9445     | 0.31           |
|  | -1703    | 4975     | 0.45           |
|  | -1950    | 5784     | 0.44           |
|  | -2065    | 3945     | 0.70           |
|  | -1573    | 1882     | 0.96           |
|  | -11.7    | 11.4     | 0.97           |
|  | -46.4    | 5.2      | 0.14           |
|  | -50.3    | 40.3     | 0.95           |
|  | -88.3    | 11.5     | 0.16           |
|  | -49.0    | 3.1      | 0.094          |
|  | -82.9    | 30.7     | 0.49           |
|  | -77.5    | 54.3     | 0.88           |
|  | -38.8    | 8.5      | 0.27           |
|  | -24.7    | 139.0    | 0.22           |
|  | -32.4    | 41.3     | 0.94           |
|  | -44.8    | 95.8     | 0.63           |
|  | -66.1    | 17.6     | 0.34           |
|  | -26.8    | 95.6     | 0.36           |
|  | -194.0   | 74.1     | 0.51           |
|  | -0.0048  | -2.3E-04 | <b>0.027</b>   |
|  | -0.0063  | 7.2E-04  | 0.14           |
|  | -0.0060  | 0.0020   | 0.44           |
|  | -0.0060  | -4.9E-04 | <b>0.017</b>   |
|  | -0.0072  | 4.5E-04  | 0.093          |
|  | -0.0074  | 6.4E-04  | 0.11           |
|  | -7.7E-07 | 6.0E-06  | 0.16           |
|  | 4.7E-08  | 8.8E-06  | <b>0.05</b>    |
|  | -2.5E-06 | 8.0E-06  | 0.40           |
|  | 1.4E-06  | 9.0E-06  | <b>4.4E-03</b> |
|  | -1.2E-06 | 5.2E-06  | 0.28           |

|    |          |         |                |
|----|----------|---------|----------------|
| 1  |          |         |                |
| 2  | 2.5E-06  | 1.0E-05 | <b>5.0E-04</b> |
| 3  | -1.6E-06 | 5.6E-06 | 0.36           |
| 4  |          |         |                |
| 5  |          |         |                |
| 6  |          |         |                |
| 7  |          |         |                |
| 8  |          |         |                |
| 9  |          |         |                |
| 10 |          |         |                |
| 11 |          |         |                |
| 12 |          |         |                |
| 13 |          |         |                |
| 14 |          |         |                |
| 15 |          |         |                |
| 16 |          |         |                |
| 17 |          |         |                |
| 18 |          |         |                |
| 19 |          |         |                |
| 20 |          |         |                |
| 21 |          |         |                |
| 22 |          |         |                |
| 23 |          |         |                |
| 24 |          |         |                |
| 25 |          |         |                |
| 26 |          |         |                |
| 27 |          |         |                |
| 28 |          |         |                |
| 29 |          |         |                |
| 30 |          |         |                |
| 31 |          |         |                |
| 32 |          |         |                |
| 33 |          |         |                |
| 34 |          |         |                |
| 35 |          |         |                |
| 36 |          |         |                |
| 37 |          |         |                |
| 38 |          |         |                |
| 39 |          |         |                |
| 40 |          |         |                |
| 41 |          |         |                |
| 42 |          |         |                |
| 43 |          |         |                |
| 44 |          |         |                |
| 45 |          |         |                |
| 46 |          |         |                |
| 47 |          |         |                |
| 48 |          |         |                |
| 49 |          |         |                |
| 50 |          |         |                |
| 51 |          |         |                |
| 52 |          |         |                |
| 53 |          |         |                |
| 54 |          |         |                |
| 55 |          |         |                |
| 56 |          |         |                |
| 57 |          |         |                |
| 58 |          |         |                |
| 59 |          |         |                |
| 60 |          |         |                |

For peer review only

## Primary comparison: systemic GC / inhaled GC vs. controls

|                          | <u>ANOVA of cognitive parameters</u> |                |              | <u>Post-hoc Dunnett</u>            |
|--------------------------|--------------------------------------|----------------|--------------|------------------------------------|
|                          | <u>F value</u>                       | <u>P value</u> | <u>P_FDR</u> | <u>Systemic GC vs<br/>Estimate</u> |
| Reaction time            | 1.0                                  | 0.37           | 0.41         |                                    |
| Fluid intelligence score | 0.89                                 | 0.41           | 0.41         |                                    |
| Digit span               | 1.4                                  | 0.25           | 0.38         |                                    |
| Trail making A           | 5.6                                  | 0.0036         | 0.0073       | -0.11                              |
| Trail making B           | 6.1                                  | 0.0023         | 0.0068       | -0.12                              |
| Symbol substitution      | 10.3                                 | 3.5E-05        | 2.1E-04      | -0.17                              |

For peer review only

1  
2  
3  
4  
5  
6  
7  
8  
9  
10  
11  
12  
13  
14  
15  
16  
17  
18  
19  
20  
21  
22  
23  
24  
25  
26  
27  
28  
29  
30  
31  
32  
33  
34  
35  
36  
37  
38  
39  
40  
41  
42  
43  
44  
45  
46  
47  
48  
49  
50  
51  
52  
53  
54  
55  
56  
57  
58  
59  
60

nett's test  
/s. controls

Inhaled GC vs. controls

| Lower CI | Upper CI | P value     | Estimate | Lower CI | Upper CI |
|----------|----------|-------------|----------|----------|----------|
| -0.28    | 0.06     | 0.25        | -0.03    | -0.15    | 0.09     |
| -0.30    | 0.05     | 0.19        | -0.01    | -0.13    | 0.11     |
| -0.34    | -0.008   | <b>0.04</b> | -0.04    | -0.15    | 0.08     |

For peer review only

1  
2  
3  
4  
5  
6  
7  
8  
9  
10  
11  
12  
13  
14  
15  
16  
17  
18  
19  
20  
21  
22  
23  
24  
25  
26  
27  
28  
29  
30  
31  
32  
33  
34  
35  
36  
37  
38  
39  
40  
41  
42  
43  
44  
45  
46  
47  
48  
49  
50  
51  
52  
53  
54  
55  
56  
57  
58  
59  
60

**P value**

0.78  
0.98  
0.72

For peer review only

1  
2 Primary comparison: systemic GC / inhaled GC vs. controls  
3  
4

5 Likelihood ratio test of emotional parameters

6 Post-hoc pair

7 Systemic GC v

8 OR

9 **Chi squared statistic P value**

10 **P\_FDR**

|                |      |         |         |      |
|----------------|------|---------|---------|------|
| 11 Depression  | 10.6 | 4.9E-03 | 4.9E-03 | 1.76 |
| 12 Disinterest | 10.9 | 4.3E-03 | 4.9E-03 | 1.84 |
| 13 Tenseness   | 13.4 | 1.2E-03 | 2.5E-03 | 1.78 |
| 14 Tiredness   | 32.4 | 9.2E-08 | 3.7E-07 | 1.90 |

15 **For the pairwise comparisons, P values in bold are statistically significant after Bonferroni correctio**  
16  
17  
18  
19  
20  
21  
22  
23  
24  
25  
26  
27  
28  
29  
30  
31  
32  
33  
34  
35  
36  
37  
38  
39  
40  
41  
42  
43  
44  
45  
46  
47  
48  
49  
50  
51  
52  
53  
54  
55  
56  
57  
58  
59  
60

**wise comparisons****vs. controls****Inhaled GC vs. controls**

|  | <b>95% CI</b> | <b>P value</b> | <b>OR</b> | <b>95% CI</b> | <b>P value</b> |
|--|---------------|----------------|-----------|---------------|----------------|
|  | 1.25; 2.43    | <b>8.2E-04</b> | 1.10      | 0.87; 1.38    | 0.43           |
|  | 1.29; 2.56    | <b>5.1E-04</b> | 1.06      | 0.82; 1.36    | 0.64           |
|  | 1.29; 2.41    | <b>3.0E-04</b> | 1.16      | 0.92; 1.43    | 0.19           |
|  | 1.45; 2.50    | <b>4.4E-06</b> | 1.35      | 1.14; 1.60    | <b>6.3E-04</b> |

Adjustment for family-wise error rate of two tests (P < 0.025)

For peer review only

## Subanalysis: chronic systemic GC / chronic inhaled GC vs. controls

|                          | <u>ANOVA of cognitive parameters</u> |                |              | <u>Post-hoc Dunnett</u>           |
|--------------------------|--------------------------------------|----------------|--------------|-----------------------------------|
|                          | <u>F value</u>                       | <u>P value</u> | <u>P_FDR</u> | <u>Systemic GC v<br/>Estimate</u> |
| Reaction time            | 0.17                                 | 0.84           | 0.84         |                                   |
| Fluid intelligence score | 1.1                                  | 0.34           | 0.84         |                                   |
| Digit span               | 3.5                                  | 0.03           | 0.19         |                                   |
| Trail making A           | 0.41                                 | 0.66           | 0.84         | 0.12                              |
| Trail making B           | 0.28                                 | 0.75           | 0.84         | -0.08                             |
| Symbol substitution      | 0.35                                 | 0.70           | 0.84         | -0.08                             |

For peer review only



1  
2  
3  
4  
5  
6  
7  
8  
9  
10  
11  
12  
13  
14  
15  
16  
17  
18  
19  
20  
21  
22  
23  
24  
25  
26  
27  
28  
29  
30  
31  
32  
33  
34  
35  
36  
37  
38  
39  
40  
41  
42  
43  
44  
45  
46  
47  
48  
49  
50  
51  
52  
53  
54  
55  
56  
57  
58  
59  
60

**nett's test**  
**/s. controls**

**Inhaled GC vs. controls**

| <b>Lower CI</b> | <b>Upper CI</b> | <b>P value</b> | <b>Estimate</b> | <b>Lower CI</b> | <b>Upper CI</b> |
|-----------------|-----------------|----------------|-----------------|-----------------|-----------------|
| -0.26           | 0.51            | 0.69           | -0.07           | -0.24           | 0.10            |
| -0.47           | 0.31            | 0.84           | -4.7E-04        | -0.17           | 0.17            |
| -0.45           | 0.30            | 0.84           | -0.05           | -0.21           | 0.11            |

For peer review only

**P value**

0.55

1.00

0.71

For peer review only

## Subanalysis: chronic systemic GC / chronic inhaled GC vs. controls

|             | <u>Likelihood ratio test of emotional parameters</u> |                |              | <u>Post-hoc pair</u> |
|-------------|------------------------------------------------------|----------------|--------------|----------------------|
|             | <u>Chi squared statistic</u>                         | <u>P value</u> | <u>P_FDR</u> | <u>Systemic GC v</u> |
|             |                                                      |                |              | <u>OR</u>            |
| Depression  | 1.1                                                  | 0.57           | 0.57         | 1.21                 |
| Disinterest | 2.2                                                  | 0.33           | 0.44         | 1.41                 |
| Tenseness   | 2.5                                                  | 0.28           | 0.44         | 1.84                 |
| Tiredness   | 4.4                                                  | 0.11           | 0.44         | 0.96                 |

For the pairwise comparisons, P values in bold are statistically significant after Bonferroni c

**wise comparisons**

**vs. controls**

**Inhaled GC vs. controls**

| 95% CI     | P value | OR   | 95% CI     | P value        |
|------------|---------|------|------------|----------------|
| 0.45; 2.73 | 0.67    | 0.85 | 0.59; 1.18 | 0.34           |
| 0.53; 3.17 | 0.44    | 0.79 | 0.53; 1.13 | 0.21           |
| 0.84; 3.68 | 0.10    | 1.05 | 0.78; 1.40 | 0.73           |
| 0.49; 1.84 | 0.91    | 1.28 | 1.01; 1.61 | <b>3.7E-02</b> |

**Correction for family-wise error rate of two tests (P < 0.025)**

For peer review only

## Sensitivity analysis among participants without exclusion based on p

**ANOVA of imaging parameters**

|                                     | <b>F value</b> | <b>P value</b> | <b>P_FDR</b>   |
|-------------------------------------|----------------|----------------|----------------|
| <b>Volumetric measures</b>          |                |                |                |
| <b>Global volumes</b>               |                |                |                |
| Total brain volume                  | 17.7           | 2.2E-08        | <b>1.3E-07</b> |
| Grey matter volume                  | 22.3           | 2.0E-10        | <b>2.4E-09</b> |
| White matter volume                 | 5.5            | 4.1E-03        | <b>6.7E-03</b> |
| Peripheral cortex                   | 24.6           | 2.0E-11        | <b>4.4E-10</b> |
| CSF volume                          | 14.2           | 7.1E-07        | <b>2.3E-06</b> |
| <b>Subcortical volumes</b>          |                |                |                |
| Accumbens                           | 10.2           | 3.8E-05        | <b>1.0E-04</b> |
| Amygdala                            | 1.5            | 2.2E-01        | 2.4E-01        |
| Caudate                             | 4.5            | 1.1E-02        | <b>1.7E-02</b> |
| Hippocampus                         | 2.1            | 1.2E-01        | 1.5E-01        |
| Pallidum                            | 6.9            | 1.0E-03        | <b>1.9E-03</b> |
| Putamen                             | 9.8            | 5.6E-05        | <b>1.5E-04</b> |
| Thalamus                            | 9.3            | 9.4E-05        | <b>2.3E-04</b> |
| <b>Regional grey matter volumes</b> |                |                |                |
| Amygdala                            | 21.0           | 7.8E-10        | <b>7.0E-09</b> |
| Caudate                             | 12.3           | 4.7E-06        | <b>1.4E-05</b> |
| Cerebellum                          | 5.8            | 3.1E-03        | <b>5.2E-03</b> |
| Cingulate gyrus, anterior           | 1.6            | 2.0E-01        | 2.2E-01        |
| Cingulate gyrus, posterior          | 0.6            | 5.3E-01        | 5.5E-01        |
| Cuneal cortex                       | 1.5            | 2.2E-01        | 2.4E-01        |
| Hippocampus                         | 1.8            | 1.6E-01        | 1.9E-01        |
| Insular cortex                      | 8.7            | 1.7E-04        | <b>3.5E-04</b> |
| Medial frontal gyrus                | 0.6            | 5.7E-01        | 5.7E-01        |
| Precuneal cortex                    | 4.0            | 1.9E-02        | <b>2.7E-02</b> |
| <b>DTI measures</b>                 |                |                |                |
| <b>Fractional anisotropy</b>        |                |                |                |
| Global                              | 15.5           | 1.8E-07        | <b>9.4E-07</b> |
| Body of corpus callosum             | 8.9            | 1.4E-04        | <b>3.1E-04</b> |
| Genu of corpus callosum             | 15.2           | 2.5E-07        | <b>1.1E-06</b> |
| Splenium of corpus callosum         | 2.2            | 1.1E-01        | 1.3E-01        |
| Cingulum cingulate                  | 3.8            | 2.3E-02        | <b>3.1E-02</b> |
| Cingulum hippocampus                | 2.7            | 6.4E-02        | 8.6E-02        |
| Uncinate                            | 2.5            | 8.2E-02        | 1.1E-01        |
| <b>Mean diffusivity</b>             |                |                |                |
| Global                              | 24.5           | 2.4E-11        | <b>4.4E-10</b> |
| Body of corpus callosum             | 14.2           | 6.7E-07        | <b>2.3E-06</b> |
| Genu of corpus callosum             | 17.9           | 1.7E-08        | <b>1.2E-07</b> |
| Splenium of corpus callosum         | 6.7            | 1.2E-03        | <b>2.2E-03</b> |

|    |                      |      |         |                |
|----|----------------------|------|---------|----------------|
| 1  |                      |      |         |                |
| 2  | Cingulum cingulate   | 4.9  | 7.6E-03 | <b>1.2E-02</b> |
| 3  | Cingulum hippocampus | 14.5 | 4.9E-07 | <b>2.0E-06</b> |
| 4  | Uncinate             | 7.3  | 6.6E-04 | <b>1.3E-03</b> |
| 5  |                      |      |         |                |
| 6  |                      |      |         |                |
| 7  |                      |      |         |                |
| 8  |                      |      |         |                |
| 9  |                      |      |         |                |
| 10 |                      |      |         |                |
| 11 |                      |      |         |                |
| 12 |                      |      |         |                |
| 13 |                      |      |         |                |
| 14 |                      |      |         |                |
| 15 |                      |      |         |                |
| 16 |                      |      |         |                |
| 17 |                      |      |         |                |
| 18 |                      |      |         |                |
| 19 |                      |      |         |                |
| 20 |                      |      |         |                |
| 21 |                      |      |         |                |
| 22 |                      |      |         |                |
| 23 |                      |      |         |                |
| 24 |                      |      |         |                |
| 25 |                      |      |         |                |
| 26 |                      |      |         |                |
| 27 |                      |      |         |                |
| 28 |                      |      |         |                |
| 29 |                      |      |         |                |
| 30 |                      |      |         |                |
| 31 |                      |      |         |                |
| 32 |                      |      |         |                |
| 33 |                      |      |         |                |
| 34 |                      |      |         |                |
| 35 |                      |      |         |                |
| 36 |                      |      |         |                |
| 37 |                      |      |         |                |
| 38 |                      |      |         |                |
| 39 |                      |      |         |                |
| 40 |                      |      |         |                |
| 41 |                      |      |         |                |
| 42 |                      |      |         |                |
| 43 |                      |      |         |                |
| 44 |                      |      |         |                |
| 45 |                      |      |         |                |
| 46 |                      |      |         |                |
| 47 |                      |      |         |                |
| 48 |                      |      |         |                |
| 49 |                      |      |         |                |
| 50 |                      |      |         |                |
| 51 |                      |      |         |                |
| 52 |                      |      |         |                |
| 53 |                      |      |         |                |
| 54 |                      |      |         |                |
| 55 |                      |      |         |                |
| 56 |                      |      |         |                |
| 57 |                      |      |         |                |
| 58 |                      |      |         |                |
| 59 |                      |      |         |                |
| 60 |                      |      |         |                |

For peer review only

psychiatric, neurological or endocrine history (systemic GC / inhaled GC vs. c

| <u>Post-hoc Dunnett's test</u> |          |          |                |  |                      |
|--------------------------------|----------|----------|----------------|--|----------------------|
| <u>Oral GC vs. controls</u>    |          |          |                |  | <u>Inhaled GC vs</u> |
| Estimate                       | Lower CI | Upper CI | P value        |  | Estimate             |
| -3460                          | -9320    | 2400     | 0.32           |  | 3535                 |
| -2224                          | -5577    | 1130     | 0.25           |  | 1454                 |
| -1237                          | -5078    | 2604     | 0.69           |  | 2080                 |
| -3318                          | -6330    | -307     | <b>0.028</b>   |  | 1172                 |
| 1220                           | -518     | 2958     | 0.12           |  | 223                  |
| -8.9                           | -20.4    | 2.7      | 0.16           |  | -3.7                 |
| 58.6                           | 13.8     | 103.5    | <b>7.2E-03</b> |  | -5.9                 |
| 1.2                            | -24.5    | 27.0     | 0.99           |  | -16.2                |
| -33.8                          | -90.5    | 22.9     | 0.32           |  | -20.1                |
| -19.9                          | -86.2    | 46.5     | 0.72           |  | -10.7                |
| -6.7                           | -30.4    | 17.1     | 0.75           |  | -21.7                |
| 149.6                          | 66.9     | 232.4    | <b>1.0E-04</b> |  | 42.9                 |
| 17.8                           | -19.4    | 54.9     | 0.47           |  | -2.9                 |
| -42.1                          | -103.5   | 19.4     | 0.23           |  | 8.0                  |
| -9.7                           | -142.8   | 123.4    | 0.97           |  | -1.7                 |
| -0.0031                        | -0.0055  | -7.5E-04 | <b>6.6E-03</b> |  | -0.0015              |
| -0.0039                        | -0.0076  | -0.0003  | <b>0.032</b>   |  | -0.0014              |
| -0.0056                        | -0.0097  | -0.0014  | <b>5.5E-03</b> |  | -0.0013              |
| -0.0014                        | -0.0052  | 0.0025   | 0.64           |  | -0.0018              |
| 6.6E-06                        | 3.0E-06  | 1.0E-05  | <b>3.7E-05</b> |  | 1.9E-06              |
| 6.7E-06                        | 1.9E-06  | 1.1E-05  | <b>3.4E-03</b> |  | 4.0E-06              |
| 8.0E-06                        | 2.5E-06  | 1.4E-05  | <b>2.3E-03</b> |  | 3.3E-06              |
| 3.7E-06                        | -3.1E-07 | 7.6E-06  | 0.076          |  | 4.0E-06              |

1  
2  
3  
4  
5  
6  
7  
8  
9  
10  
11  
12  
13  
14  
15  
16  
17  
18  
19  
20  
21  
22  
23  
24  
25  
26  
27  
28  
29  
30  
31  
32  
33  
34  
35  
36  
37  
38  
39  
40  
41  
42  
43  
44  
45  
46  
47  
48  
49  
50  
51  
52  
53  
54  
55  
56  
57  
58  
59  
60

|         |          |         |              |         |
|---------|----------|---------|--------------|---------|
| 2.5E-06 | -6.8E-07 | 5.7E-06 | 0.15         | 2.2E-06 |
| 2.6E-06 | -1.3E-06 | 6.6E-06 | 0.25         | 4.5E-06 |
| 4.0E-06 | 2.9E-07  | 7.7E-06 | <b>0.032</b> | 1.6E-06 |

For peer review only



controls)

controls

| Lower CI | Upper CI | P value        |
|----------|----------|----------------|
| -121     | 7190     | 0.060          |
| -637     | 3546     | 0.22           |
| -316     | 4476     | 0.10           |
| -706     | 3051     | 0.29           |
| -861     | 1307     | 0.65           |
| -10.9    | 3.5      | 0.41           |
| -33.9    | 22.1     | 0.84           |
| -32.3    | -0.2     | <b>0.047</b>   |
| -55.5    | 15.3     | 0.35           |
| -52.1    | 30.7     | 0.78           |
| -36.5    | -6.8     | <b>2.3E-03</b> |
| -8.7     | 94.5     | 0.12           |
| -26.1    | 20.3     | 0.93           |
| -30.3    | 46.3     | 0.84           |
| -84.7    | 81.3     | 1.00           |
| -0.0030  | -4.9E-05 | <b>0.041</b>   |
| -0.0036  | 8.9E-04  | 0.30           |
| -0.0039  | 0.0013   | 0.44           |
| -0.0042  | 5.9E-04  | 0.17           |
| -3.2E-07 | 4.1E-06  | 0.057          |
| 1.1E-06  | 7.0E-06  | <b>4.8E-03</b> |
| -1.4E-07 | 6.7E-06  | 0.062          |
| 1.5E-06  | 6.4E-06  | <b>7.0E-04</b> |

|    |          |         |                |
|----|----------|---------|----------------|
| 1  |          |         |                |
| 2  | 2.2E-07  | 4.2E-06 | <b>0.026</b>   |
| 3  | 2.0E-06  | 7.0E-06 | <b>1.0E-04</b> |
| 4  | -7.5E-07 | 3.9E-06 | 0.23           |
| 5  |          |         |                |
| 6  |          |         |                |
| 7  |          |         |                |
| 8  |          |         |                |
| 9  |          |         |                |
| 10 |          |         |                |
| 11 |          |         |                |
| 12 |          |         |                |
| 13 |          |         |                |
| 14 |          |         |                |
| 15 |          |         |                |
| 16 |          |         |                |
| 17 |          |         |                |
| 18 |          |         |                |
| 19 |          |         |                |
| 20 |          |         |                |
| 21 |          |         |                |
| 22 |          |         |                |
| 23 |          |         |                |
| 24 |          |         |                |
| 25 |          |         |                |
| 26 |          |         |                |
| 27 |          |         |                |
| 28 |          |         |                |
| 29 |          |         |                |
| 30 |          |         |                |
| 31 |          |         |                |
| 32 |          |         |                |
| 33 |          |         |                |
| 34 |          |         |                |
| 35 |          |         |                |
| 36 |          |         |                |
| 37 |          |         |                |
| 38 |          |         |                |
| 39 |          |         |                |
| 40 |          |         |                |
| 41 |          |         |                |
| 42 |          |         |                |
| 43 |          |         |                |
| 44 |          |         |                |
| 45 |          |         |                |
| 46 |          |         |                |
| 47 |          |         |                |
| 48 |          |         |                |
| 49 |          |         |                |
| 50 |          |         |                |
| 51 |          |         |                |
| 52 |          |         |                |
| 53 |          |         |                |
| 54 |          |         |                |
| 55 |          |         |                |
| 56 |          |         |                |
| 57 |          |         |                |
| 58 |          |         |                |
| 59 |          |         |                |
| 60 |          |         |                |

For peer review only

## Sensitivity analysis among participants without exclusion based on psychia

|                          | <u>ANOVA</u> |         |                | <u>Post-hoc Dunnett</u> |
|--------------------------|--------------|---------|----------------|-------------------------|
|                          |              |         |                | <u>Systemic GC v</u>    |
|                          | F value      | P value | P_FDR          | Estimate                |
| Reaction time            | 1.0          | 0.35    | 0.42           |                         |
| Fluid intelligence score | 1.9          | 0.15    | 0.23           |                         |
| Digit span               | 0.5          | 0.63    | 0.63           |                         |
| Trail making A           | 6.6          | 0.0014  | <b>0.0028</b>  | -0.11                   |
| Trail making B           | 6.7          | 0.0013  | <b>0.0028</b>  | -0.12                   |
| Symbol substitution      | 9.7          | 6.2E-05 | <b>0.00037</b> | -0.15                   |

For peer review only

atric, neurological or endocrine history (systemic GC / inhaled GC vs. contro

nett's test

vs. controls

Inhaled GC vs. controls

| Lower CI | Upper CI | P value     | Estimate | Lower CI | Upper CI |
|----------|----------|-------------|----------|----------|----------|
| -0.26    | 0.03     | 0.16        | 0.020    | -0.08    | 0.12     |
| -0.27    | 0.02     | 0.10        | -0.018   | -0.12    | 0.08     |
| -0.29    | -0.01    | <b>0.03</b> | -0.061   | -0.16    | 0.04     |

For peer review only

1  
2  
3  
4  
5  
6  
7  
8  
9  
10  
11  
12  
13  
14  
15  
16  
17  
18  
19  
20  
21  
22  
23  
24  
25  
26  
27  
28  
29  
30  
31  
32  
33  
34  
35  
36  
37  
38  
39  
40  
41  
42  
43  
44  
45  
46  
47  
48  
49  
50  
51  
52  
53  
54  
55  
56  
57  
58  
59  
60

ols)

**P value**

0.86  
0.88  
0.28

For peer review only

## Sensitivity analysis among participants without exclusion based on psych

|             | <u>Likelihood ratio test of emotional parameters</u> |                |              | <u>Post-hoc pair</u>              |
|-------------|------------------------------------------------------|----------------|--------------|-----------------------------------|
|             | <u>Chi squared statistic</u>                         | <u>P value</u> | <u>P_FDR</u> | <u>Systemic GC v</u><br><u>OR</u> |
| Depression  | 11.1                                                 | 0.0039         | 3.9E-03      | 1.44                              |
| Disinterest | 17.8                                                 | 0.00014        | 1.9E-04      | 1.73                              |
| Tenseness   | 24.0                                                 | 6.1E-06        | 1.2E-05      | 1.68                              |
| Tiredness   | 39.2                                                 | 3.1E-09        | 1.2E-08      | 1.79                              |

For the pairwise comparisons, P values in bold are statistically significant after Bonferroni cor

1  
2 psychiatric, neurological or endocrine history (systemic GC / inhaled GC vs. con  
3  
4

5 **wise comparisons**

| <b><u>vs. controls</u></b> |                | <b><u>Inhaled GC vs. controls</u></b> |               |                |
|----------------------------|----------------|---------------------------------------|---------------|----------------|
| <b>95% CI</b>              | <b>P value</b> | <b>OR</b>                             | <b>95% CI</b> | <b>P value</b> |
| 1.08; 1.89                 | <b>0.010</b>   | 1.23                                  | 1.03; 1.46    | <b>0.023</b>   |
| 1.31; 2.27                 | <b>8.5E-05</b> | 1.21                                  | 1.00; 1.45    | 0.041          |
| 1.29; 2.16                 | <b>7.0E-05</b> | 1.31                                  | 1.11; 1.54    | <b>1.4E-03</b> |
| 1.42; 2.27                 | <b>9.0E-07</b> | 1.33                                  | 1.15; 1.53    | <b>1.1E-04</b> |

14  
15  
16 **rection for family-wise error rate of two tests (P < 0.025)**  
17  
18  
19  
20  
21  
22  
23  
24  
25  
26  
27  
28  
29  
30  
31  
32  
33  
34  
35  
36  
37  
38  
39  
40  
41  
42  
43  
44  
45  
46  
47  
48  
49  
50  
51  
52  
53  
54  
55  
56  
57  
58  
59  
60

ontrols)

For peer review only

1  
2  
3  
4  
5  
6  
7  
8  
9  
10  
11  
12  
13  
14  
15  
16  
17  
18  
19  
20  
21  
22  
23  
24  
25  
26  
27  
28  
29  
30  
31  
32  
33  
34  
35  
36  
37  
38  
39  
40  
41  
42  
43  
44  
45  
46  
47  
48  
49  
50  
51  
52  
53  
54  
55  
56  
57  
58  
59  
60



1  
2  
3  
4  
5  
6  
7  
8  
9  
10  
11  
12  
13  
14  
15  
16  
17  
18  
19  
20  
21  
22  
23  
24  
25  
26  
27  
28  
29  
30  
31  
32  
33  
34  
35  
36  
37  
38  
39  
40  
41  
42  
43  
44  
45  
46  
47  
48  
49  
50  
51  
52  
53  
54  
55  
56  
57  
58  
59  
60**Systemic GC users (n = 222)****Number of outliers**                      **%****Volumetric measures*****Global volumes***

|                     |   |     |
|---------------------|---|-----|
| Total brain volume  | 2 | 0.9 |
| Grey matter volume  | 6 | 2.7 |
| White matter volume | 2 | 0.9 |
| Peripheral cortex   | 6 | 2.7 |
| CSF volume          | 9 | 4.1 |

***Subcortical volumes***

|             |   |     |
|-------------|---|-----|
| Accumbens   | 2 | 0.9 |
| Amygdala    | 3 | 1.4 |
| Caudate     | 5 | 2.3 |
| Hippocampus | 3 | 1.4 |
| Pallidum    | 2 | 0.9 |
| Putamen     | 7 | 3.2 |
| Thalamus    | 4 | 1.8 |

***Regional grey matter volumes***

|                            |    |     |
|----------------------------|----|-----|
| Amygdala                   | 5  | 2.3 |
| Caudate                    | 18 | 8.1 |
| Cerebellum                 | 11 | 5.0 |
| Cingulate gyrus, anterior  | 7  | 3.2 |
| Cingulate gyrus, posterior | 5  | 2.3 |
| Cuneal cortex              | 3  | 1.4 |
| Hippocampus                | 4  | 1.8 |
| Insular cortex             | 6  | 2.7 |
| Medial frontal gyrus       | 3  | 1.4 |
| Precuneal cortex           | 7  | 3.2 |

**DTI measures*****Fractional anisotropy***

|                             |    |     |
|-----------------------------|----|-----|
| Global                      | 2  | 0.9 |
| Body of corpus callosum     | 4  | 1.8 |
| Genu of corpus callosum     | 10 | 4.5 |
| Splenium of corpus callosum | 4  | 1.8 |
| Cingulum cingulate          | 4  | 1.8 |
| Cingulum hippocampus        | 3  | 1.4 |
| Uncinate                    | 1  | 0.5 |

***Mean diffusivity***

|                             |   |     |
|-----------------------------|---|-----|
| Global                      | 7 | 3.2 |
| Body of corpus callosum     | 3 | 1.4 |
| Genu of corpus callosum     | 4 | 1.8 |
| Splenium of corpus callosum | 5 | 2.3 |
| Cingulum cingulate          | 6 | 2.7 |

|    |                      |   |     |
|----|----------------------|---|-----|
| 1  |                      |   |     |
| 2  | Cingulum hippocampus | 4 | 1.8 |
| 3  | Uncinate             | 4 | 1.8 |
| 4  |                      |   |     |
| 5  |                      |   |     |
| 6  |                      |   |     |
| 7  |                      |   |     |
| 8  |                      |   |     |
| 9  |                      |   |     |
| 10 |                      |   |     |
| 11 |                      |   |     |
| 12 |                      |   |     |
| 13 |                      |   |     |
| 14 |                      |   |     |
| 15 |                      |   |     |
| 16 |                      |   |     |
| 17 |                      |   |     |
| 18 |                      |   |     |
| 19 |                      |   |     |
| 20 |                      |   |     |
| 21 |                      |   |     |
| 22 |                      |   |     |
| 23 |                      |   |     |
| 24 |                      |   |     |
| 25 |                      |   |     |
| 26 |                      |   |     |
| 27 |                      |   |     |
| 28 |                      |   |     |
| 29 |                      |   |     |
| 30 |                      |   |     |
| 31 |                      |   |     |
| 32 |                      |   |     |
| 33 |                      |   |     |
| 34 |                      |   |     |
| 35 |                      |   |     |
| 36 |                      |   |     |
| 37 |                      |   |     |
| 38 |                      |   |     |
| 39 |                      |   |     |
| 40 |                      |   |     |
| 41 |                      |   |     |
| 42 |                      |   |     |
| 43 |                      |   |     |
| 44 |                      |   |     |
| 45 |                      |   |     |
| 46 |                      |   |     |
| 47 |                      |   |     |
| 48 |                      |   |     |
| 49 |                      |   |     |
| 50 |                      |   |     |
| 51 |                      |   |     |
| 52 |                      |   |     |
| 53 |                      |   |     |
| 54 |                      |   |     |
| 55 |                      |   |     |
| 56 |                      |   |     |
| 57 |                      |   |     |
| 58 |                      |   |     |
| 59 |                      |   |     |
| 60 |                      |   |     |

For peer review only

1  
2  
3  
4  
5  
6  
7  
8  
9  
10  
11  
12  
13  
14  
15  
16  
17  
18  
19  
20  
21  
22  
23  
24  
25  
26  
27  
28  
29  
30  
31  
32  
33  
34  
35  
36  
37  
38  
39  
40  
41  
42  
43  
44  
45  
46  
47  
48  
49  
50  
51  
52  
53  
54  
55  
56  
57  
58  
59  
60

| <b>Inhaled GC users (n = 557)</b> |          | <b>Controls (n = 24106)</b> |          |
|-----------------------------------|----------|-----------------------------|----------|
| <b>Number of outliers</b>         | <b>%</b> | <b>Number of outliers</b>   | <b>%</b> |
| 1                                 | 0.2      | 134                         | 0.6      |
| 1                                 | 0.2      | 153                         | 0.6      |
| 3                                 | 0.5      | 130                         | 0.5      |
| 1                                 | 0.2      | 159                         | 0.7      |
| 22                                | 3.9      | 859                         | 3.6      |
| 7                                 | 1.3      | 195                         | 0.8      |
| 6                                 | 1.1      | 217                         | 0.9      |
| 2                                 | 0.4      | 269                         | 1.1      |
| 11                                | 2.0      | 399                         | 1.7      |
| 4                                 | 0.7      | 490                         | 2.0      |
| 1                                 | 0.2      | 237                         | 1.0      |
| 6                                 | 1.1      | 225                         | 0.9      |
| 7                                 | 1.3      | 281                         | 1.2      |
| 27                                | 4.8      | 1138                        | 4.7      |
| 6                                 | 1.1      | 316                         | 1.3      |
| 21                                | 3.8      | 758                         | 3.1      |
| 11                                | 2.0      | 359                         | 1.5      |
| 2                                 | 0.4      | 304                         | 1.3      |
| 7                                 | 1.3      | 248                         | 1.0      |
| 2                                 | 0.4      | 239                         | 1.0      |
| 4                                 | 0.7      | 229                         | 0.9      |
| 2                                 | 0.4      | 216                         | 0.9      |
| 12                                | 2.2      | 388                         | 1.6      |
| 13                                | 2.3      | 456                         | 1.9      |
| 12                                | 2.2      | 520                         | 2.2      |
| 20                                | 3.6      | 331                         | 1.4      |
| 4                                 | 0.7      | 215                         | 0.9      |
| 4                                 | 0.7      | 277                         | 1.1      |
| 6                                 | 1.1      | 221                         | 0.9      |
| 11                                | 2.0      | 613                         | 2.5      |
| 15                                | 2.7      | 468                         | 1.9      |
| 11                                | 2.0      | 535                         | 2.2      |
| 12                                | 2.2      | 543                         | 2.3      |
| 10                                | 1.8      | 447                         | 1.9      |

|    |    |     |     |     |
|----|----|-----|-----|-----|
| 1  |    |     |     |     |
| 2  | 16 | 2.9 | 343 | 1.4 |
| 3  | 6  | 1.1 | 322 | 1.3 |
| 4  |    |     |     |     |
| 5  |    |     |     |     |
| 6  |    |     |     |     |
| 7  |    |     |     |     |
| 8  |    |     |     |     |
| 9  |    |     |     |     |
| 10 |    |     |     |     |
| 11 |    |     |     |     |
| 12 |    |     |     |     |
| 13 |    |     |     |     |
| 14 |    |     |     |     |
| 15 |    |     |     |     |
| 16 |    |     |     |     |
| 17 |    |     |     |     |
| 18 |    |     |     |     |
| 19 |    |     |     |     |
| 20 |    |     |     |     |
| 21 |    |     |     |     |
| 22 |    |     |     |     |
| 23 |    |     |     |     |
| 24 |    |     |     |     |
| 25 |    |     |     |     |
| 26 |    |     |     |     |
| 27 |    |     |     |     |
| 28 |    |     |     |     |
| 29 |    |     |     |     |
| 30 |    |     |     |     |
| 31 |    |     |     |     |
| 32 |    |     |     |     |
| 33 |    |     |     |     |
| 34 |    |     |     |     |
| 35 |    |     |     |     |
| 36 |    |     |     |     |
| 37 |    |     |     |     |
| 38 |    |     |     |     |
| 39 |    |     |     |     |
| 40 |    |     |     |     |
| 41 |    |     |     |     |
| 42 |    |     |     |     |
| 43 |    |     |     |     |
| 44 |    |     |     |     |
| 45 |    |     |     |     |
| 46 |    |     |     |     |
| 47 |    |     |     |     |
| 48 |    |     |     |     |
| 49 |    |     |     |     |
| 50 |    |     |     |     |
| 51 |    |     |     |     |
| 52 |    |     |     |     |
| 53 |    |     |     |     |
| 54 |    |     |     |     |
| 55 |    |     |     |     |
| 56 |    |     |     |     |
| 57 |    |     |     |     |
| 58 |    |     |     |     |
| 59 |    |     |     |     |
| 60 |    |     |     |     |

For peer review only

## Sensitivity analysis after exclusion of outlier values

**ANOVA of imaging parameters**

|                                            | <b>F value</b> | <b>P value</b> | <b>P_FDR</b>   |
|--------------------------------------------|----------------|----------------|----------------|
| <b>Volumetric measures</b>                 |                |                |                |
| <b><i>Global volumes</i></b>               |                |                |                |
| Total brain volume                         | 16.0           | 1.1E-07        | <b>4.6E-07</b> |
| Grey matter volume                         | 28.8           | 3.4E-13        | <b>6.1E-12</b> |
| White matter volume                        | 5.4            | 4.6E-03        | <b>7.1E-03</b> |
| Peripheral cortex                          | 27.0           | 2.0E-12        | <b>1.8E-11</b> |
| CSF volume                                 | 16.8           | 5.0E-08        | <b>2.3E-07</b> |
| <b><i>Subcortical volumes</i></b>          |                |                |                |
| Accumbens                                  | 13.0           | 2.3E-06        | <b>5.8E-06</b> |
| Amygdala                                   | 2.7            | 6.9E-02        | 7.7E-02        |
| Caudate                                    | 4.7            | 8.8E-03        | <b>1.1E-02</b> |
| Hippocampus                                | 5.4            | 4.7E-03        | <b>7.1E-03</b> |
| Pallidum                                   | 4.9            | 7.4E-03        | <b>9.8E-03</b> |
| Putamen                                    | 13.7           | 1.1E-06        | <b>3.4E-06</b> |
| Thalamus                                   | 10.0           | 4.6E-05        | <b>8.7E-05</b> |
| <b><i>Regional grey matter volumes</i></b> |                |                |                |
| Amygdala                                   | 28.3           | 5.1E-13        | <b>6.1E-12</b> |
| Caudate                                    | 12.6           | 3.5E-06        | <b>8.4E-06</b> |
| Cerebellum                                 | 10.3           | 3.3E-05        | <b>6.6E-05</b> |
| Cingulate gyrus, anterior                  | 3.9            | 2.1E-02        | <b>2.6E-02</b> |
| Cingulate gyrus, posterior                 | 2.3            | 1.0E-01        | 1.1E-01        |
| Cuneal cortex                              | 1.5            | 2.2E-01        | 2.2E-01        |
| Hippocampus                                | 3.3            | 3.9E-02        | <b>4.6E-02</b> |
| Insular cortex                             | 13.1           | 2.0E-06        | <b>5.5E-06</b> |
| Medial frontal gyrus                       | 0.4            | 6.8E-01        | 6.8E-01        |
| Precuneal cortex                           | 5.2            | 5.4E-03        | <b>7.5E-03</b> |
| <b>DTI measures</b>                        |                |                |                |
| <b><i>Fractional anisotropy</i></b>        |                |                |                |
| Global                                     | 22.7           | 1.4E-10        | <b>1.0E-09</b> |
| Body of corpus callosum                    | 11.4           | 1.1E-05        | <b>2.5E-05</b> |
| Genu of corpus callosum                    | 15.3           | 2.3E-07        | <b>8.4E-07</b> |
| Splenium of corpus callosum                | 2.7            | 6.4E-02        | 7.5E-02        |
| Cingulum cingulate                         | 6.5            | 1.5E-03        | <b>2.5E-03</b> |
| Cingulum hippocampus                       | 7.5            | 5.7E-04        | <b>9.7E-04</b> |
| Uncinate                                   | 2.6            | 7.6E-02        | 8.3E-02        |
| <b><i>Mean diffusivity</i></b>             |                |                |                |
| Global                                     | 29.1           | 2.4E-13        | <b>6.1E-12</b> |
| Body of corpus callosum                    | 17.1           | 3.6E-08        | <b>1.9E-07</b> |
| Genu of corpus callosum                    | 21.6           | 4.3E-10        | <b>2.6E-09</b> |
| Splenium of corpus callosum                | 9.9            | 5.2E-05        | <b>9.4E-05</b> |

|   |                      |      |         |                |
|---|----------------------|------|---------|----------------|
| 1 |                      |      |         |                |
| 2 | Cingulum cingulate   | 5.3  | 5.2E-03 | <b>7.5E-03</b> |
| 3 | Cingulum hippocampus | 13.7 | 1.1E-06 | <b>3.4E-06</b> |
| 4 | Uncinate             | 11.3 | 1.2E-05 | <b>2.5E-05</b> |
| 5 |                      |      |         |                |
| 6 |                      |      |         |                |

7 P values in blue were not significant ( $P < 0.05$ ) in the original analysis, but are in this analysis

8

9

10

11

12

13

14

15

16

17

18

19

20

21

22

23

24

25

26

27

28

29

30

31

32

33

34

35

36

37

38

39

40

41

42

43

44

45

46

47

48

49

50

51

52

53

54

55

56

57

58

59

60



|   |         |          |         |                |         |
|---|---------|----------|---------|----------------|---------|
| 1 |         |          |         |                |         |
| 2 | 2.6E-06 | -9.4E-07 | 6.1E-06 | 0.19           | 2.6E-06 |
| 3 | 4.4E-06 | 2.5E-07  | 8.6E-06 | <b>0.035</b>   | 4.3E-06 |
| 4 | 5.8E-06 | 1.9E-06  | 9.7E-06 | <b>1.8E-03</b> | 2.4E-06 |
| 5 |         |          |         |                |         |
| 6 |         |          |         |                |         |

7 after exclusion of outliers.

8  
9  
10  
11  
12  
13  
14  
15  
16  
17  
18  
19  
20  
21  
22  
23  
24  
25  
26  
27  
28  
29  
30  
31  
32  
33  
34  
35  
36  
37  
38  
39  
40  
41  
42  
43  
44  
45  
46  
47  
48  
49  
50  
51  
52  
53  
54  
55  
56  
57  
58  
59  
60

For peer review only





|    |          |         |                |
|----|----------|---------|----------------|
| 1  |          |         |                |
| 2  | 3.6E-07  | 4.8E-06 | <b>0.019</b>   |
| 3  | 1.6E-06  | 6.9E-06 | <b>6.0E-04</b> |
| 4  | -8.8E-08 | 4.8E-06 | 0.061          |
| 5  |          |         |                |
| 6  |          |         |                |
| 7  |          |         |                |
| 8  |          |         |                |
| 9  |          |         |                |
| 10 |          |         |                |
| 11 |          |         |                |
| 12 |          |         |                |
| 13 |          |         |                |
| 14 |          |         |                |
| 15 |          |         |                |
| 16 |          |         |                |
| 17 |          |         |                |
| 18 |          |         |                |
| 19 |          |         |                |
| 20 |          |         |                |
| 21 |          |         |                |
| 22 |          |         |                |
| 23 |          |         |                |
| 24 |          |         |                |
| 25 |          |         |                |
| 26 |          |         |                |
| 27 |          |         |                |
| 28 |          |         |                |
| 29 |          |         |                |
| 30 |          |         |                |
| 31 |          |         |                |
| 32 |          |         |                |
| 33 |          |         |                |
| 34 |          |         |                |
| 35 |          |         |                |
| 36 |          |         |                |
| 37 |          |         |                |
| 38 |          |         |                |
| 39 |          |         |                |
| 40 |          |         |                |
| 41 |          |         |                |
| 42 |          |         |                |
| 43 |          |         |                |
| 44 |          |         |                |
| 45 |          |         |                |
| 46 |          |         |                |
| 47 |          |         |                |
| 48 |          |         |                |
| 49 |          |         |                |
| 50 |          |         |                |
| 51 |          |         |                |
| 52 |          |         |                |
| 53 |          |         |                |
| 54 |          |         |                |
| 55 |          |         |                |
| 56 |          |         |                |
| 57 |          |         |                |
| 58 |          |         |                |
| 59 |          |         |                |
| 60 |          |         |                |

For peer review only

1  
2  
3  
4  
5  
6  
7  
8  
9  
10  
11  
12  
13  
14  
15  
16  
17  
18  
19  
20  
21  
22  
23  
24  
25  
26  
27  
28  
29  
30  
31  
32  
33  
34  
35  
36  
37  
38  
39  
40  
41  
42  
43  
44  
45  
46  
47  
48  
49  
50  
51  
52  
53  
54  
55  
56  
57  
58  
59  
60**Systemic GC users (n = 222)****Inhaled GC users (n = 557)**

|                          | <b>Number of outliers</b> | <b>%</b> | <b>Number of outliers</b> |
|--------------------------|---------------------------|----------|---------------------------|
| Reaction time*           | 4                         | 1.8      | 11                        |
| Fluid intelligence score | 2                         | 0.9      | 1                         |
| Digit span               | 1                         | 0.5      | 24                        |
| Trail making A*          | 6                         | 2.7      | 10                        |
| Trail making B*          | 2                         | 0.9      | 2                         |
| Symbol substitution      | 5                         | 2.3      | 3                         |

\* Reaction time, trail making A, and trail making B were log transformed for normalization.

For peer review only

1  
2  
3  
4  
5  
6  
7  
8  
9  
10  
11  
12  
13  
14  
15  
16  
17  
18  
19  
20  
21  
22  
23  
24  
25  
26  
27  
28  
29  
30  
31  
32  
33  
34  
35  
36  
37  
38  
39  
40  
41  
42  
43  
44  
45  
46  
47  
48  
49  
50  
51  
52  
53  
54  
55  
56  
57  
58  
59  
60

| <b>Controls (n = 24106)</b> |                           |  |          |
|-----------------------------|---------------------------|--|----------|
| <b>%</b>                    | <b>Number of outliers</b> |  | <b>%</b> |
| 2.0                         | 389                       |  | 1.6      |
| 0.2                         | 50                        |  | 0.2      |
| 4.3                         | 79                        |  | 0.3      |
| 1.8                         | 423                       |  | 1.8      |
| 0.4                         | 338                       |  | 1.4      |
| 0.5                         | 172                       |  | 0.7      |

For peer review only

## Sensitivity analysis after exclusion of outlier values

|                          | <u>ANOVA</u>   |                |                | <u>Post-hoc Dunnett</u> |
|--------------------------|----------------|----------------|----------------|-------------------------|
|                          | <u>F value</u> | <u>P value</u> | <u>P_FDR</u>   | <u>Systemic GC v</u>    |
|                          |                |                |                | <u>Estimate</u>         |
| Reaction time            | 1.0            | 0.38           | 0.45           |                         |
| Fluid intelligence score | 0.8            | 0.45           | 0.45           |                         |
| Digit span               | 3.1            | 0.047          | 0.070          |                         |
| Trail making A           | 5.2            | 5.7E-03        | <b>0.011</b>   | -0.10                   |
| Trail making B           | 9.6            | 6.8E-05        | <b>2.0E-04</b> | -0.16                   |
| Symbol substitution      | 11.6           | 8.9E-06        | <b>5.3E-05</b> | -0.18                   |

For peer review only

1  
2  
3  
4  
5  
6  
7  
8  
9  
10  
11  
12  
13  
14  
15  
16  
17  
18  
19  
20  
21  
22  
23  
24  
25  
26  
27  
28  
29  
30  
31  
32  
33  
34  
35  
36  
37  
38  
39  
40  
41  
42  
43  
44  
45  
46  
47  
48  
49  
50  
51  
52  
53  
54  
55  
56  
57  
58  
59  
60

nett's test  
/s. controls

Inhaled GC vs. controls

| Lower CI | Upper CI | P value     | Estimate | Lower CI | Upper CI |
|----------|----------|-------------|----------|----------|----------|
| -0.25    | 0.05     | 0.25        | -0.02    | -0.12    | 0.09     |
| -0.32    | -0.01    | <b>0.04</b> | -0.06    | -0.17    | 0.04     |
| -0.34    | -0.02    | <b>0.02</b> | -0.05    | -0.16    | 0.06     |

For peer review only

1  
2  
3  
4  
5  
6  
7  
8  
9  
10  
11  
12  
13  
14  
15  
16  
17  
18  
19  
20  
21  
22  
23  
24  
25  
26  
27  
28  
29  
30  
31  
32  
33  
34  
35  
36  
37  
38  
39  
40  
41  
42  
43  
44  
45  
46  
47  
48  
49  
50  
51  
52  
53  
54  
55  
56  
57  
58  
59  
60

**P value**

0.88  
0.31  
0.55

For peer review only

## Mediation analysis for total body fat percentage

| Region                                |                     | Estimate |
|---------------------------------------|---------------------|----------|
| Caudate, subcortical volume           | ACME                | -1.2     |
|                                       | ADE                 | 78.5     |
|                                       | Total effect        | 77.4     |
|                                       | Proportion mediated | 0.0      |
| Amygdala, regional grey matter volume | ACME                | -1.2     |
|                                       | ADE                 | 1.2      |
|                                       | Total effect        | -0.1     |
|                                       | Proportion mediated | 17.7     |
| Caudate, regional grey matter volume  | ACME                | -0.9     |
|                                       | ADE                 | 184.0    |
|                                       | Total effect        | 183.0    |
|                                       | Proportion mediated | 0.0      |
| Global FA                             | ACME                | -2.5E-05 |
|                                       | ADE                 | -3.8E-03 |
|                                       | Total effect        | -3.8E-03 |
|                                       | Proportion mediated | 6.6E-03  |
| Global MD                             | ACME                | -4.8E-08 |
|                                       | ADE                 | 7.5E-06  |
|                                       | Total effect        | 7.5E-06  |
|                                       | Proportion mediated | -6.4E-03 |

ACME, average causal mediation effects; ADE, average direct effects.



1  
2  
3  
4  
5  
6  
7  
8  
9  
10  
11  
12  
13  
14  
15  
16  
17  
18  
19  
20  
21  
22  
23  
24  
25  
26  
27  
28  
29  
30  
31  
32  
33  
34  
35  
36  
37  
38  
39  
40  
41  
42  
43  
44  
45  
46  
47  
48  
49  
50  
51  
52  
53  
54  
55  
56  
57  
58  
59  
60

| Lower CI | Upper CI | P value | Total sample size used |
|----------|----------|---------|------------------------|
| -3.7     | 1.0      | 0.27    | 23338                  |
| 31.2     | 124.6    | <2e-16  |                        |
| 30.0     | 123.3    | <2e-16  |                        |
| -0.1     | 0.0      | 0.27    |                        |
| -3.6     | 1.0      | 0.29    | 23338                  |
| -24.2    | 26.7     | 0.93    |                        |
| -25.7    | 26.0     | 0.98    |                        |
| -1.9     | 1.9      | 0.94    |                        |
| -3.1     | 0.7      | 0.27    | 23338                  |
| 79.4     | 293.5    | <2e-16  |                        |
| 77.9     | 293.0    | <2e-16  |                        |
| 0.0      | 0.0      | 0.27    |                        |
| -8.6E-05 | 0        | 0.3     | 23338                  |
| -6.3E-03 | 0        | <2e-16  |                        |
| -6.4E-03 | 0        | <2e-16  |                        |
| -5.5E-03 | 4.0E-02  | 0.3     |                        |
| -1.5E-07 | 0        | 0.31    | 23338                  |
| 3.7E-06  | 0        | <2e-16  |                        |
| 3.7E-06  | 0        | <2e-16  |                        |
| -2.5E-02 | 1.0E-02  | 0.31    |                        |

1  
2  
3 **Supplements**  
4

5 Supplements 1, 2 and 3 are separate files.  
6  
7  
8  
9  
10  
11  
12  
13  
14  
15  
16  
17  
18  
19  
20  
21  
22  
23  
24  
25  
26  
27  
28  
29  
30  
31  
32  
33  
34  
35  
36  
37  
38  
39  
40  
41  
42  
43  
44  
45  
46  
47  
48  
49  
50  
51  
52  
53  
54  
55  
56  
57  
58  
59  
60

For peer review only

1  
2  
3  
4  
5  
6  
7  
8  
9  
10  
11  
12  
13  
14  
15  
16  
17  
18  
19  
20  
21  
22  
23  
24  
25  
26  
27  
28  
29  
30  
31  
32  
33  
34  
35  
36  
37  
38  
39  
40  
41  
42  
43  
44  
45  
46

**Supplement 4.** Violin plots of the imaging outcomes for the main analysis. AU, arbitrary units; GC, glucocorticoids

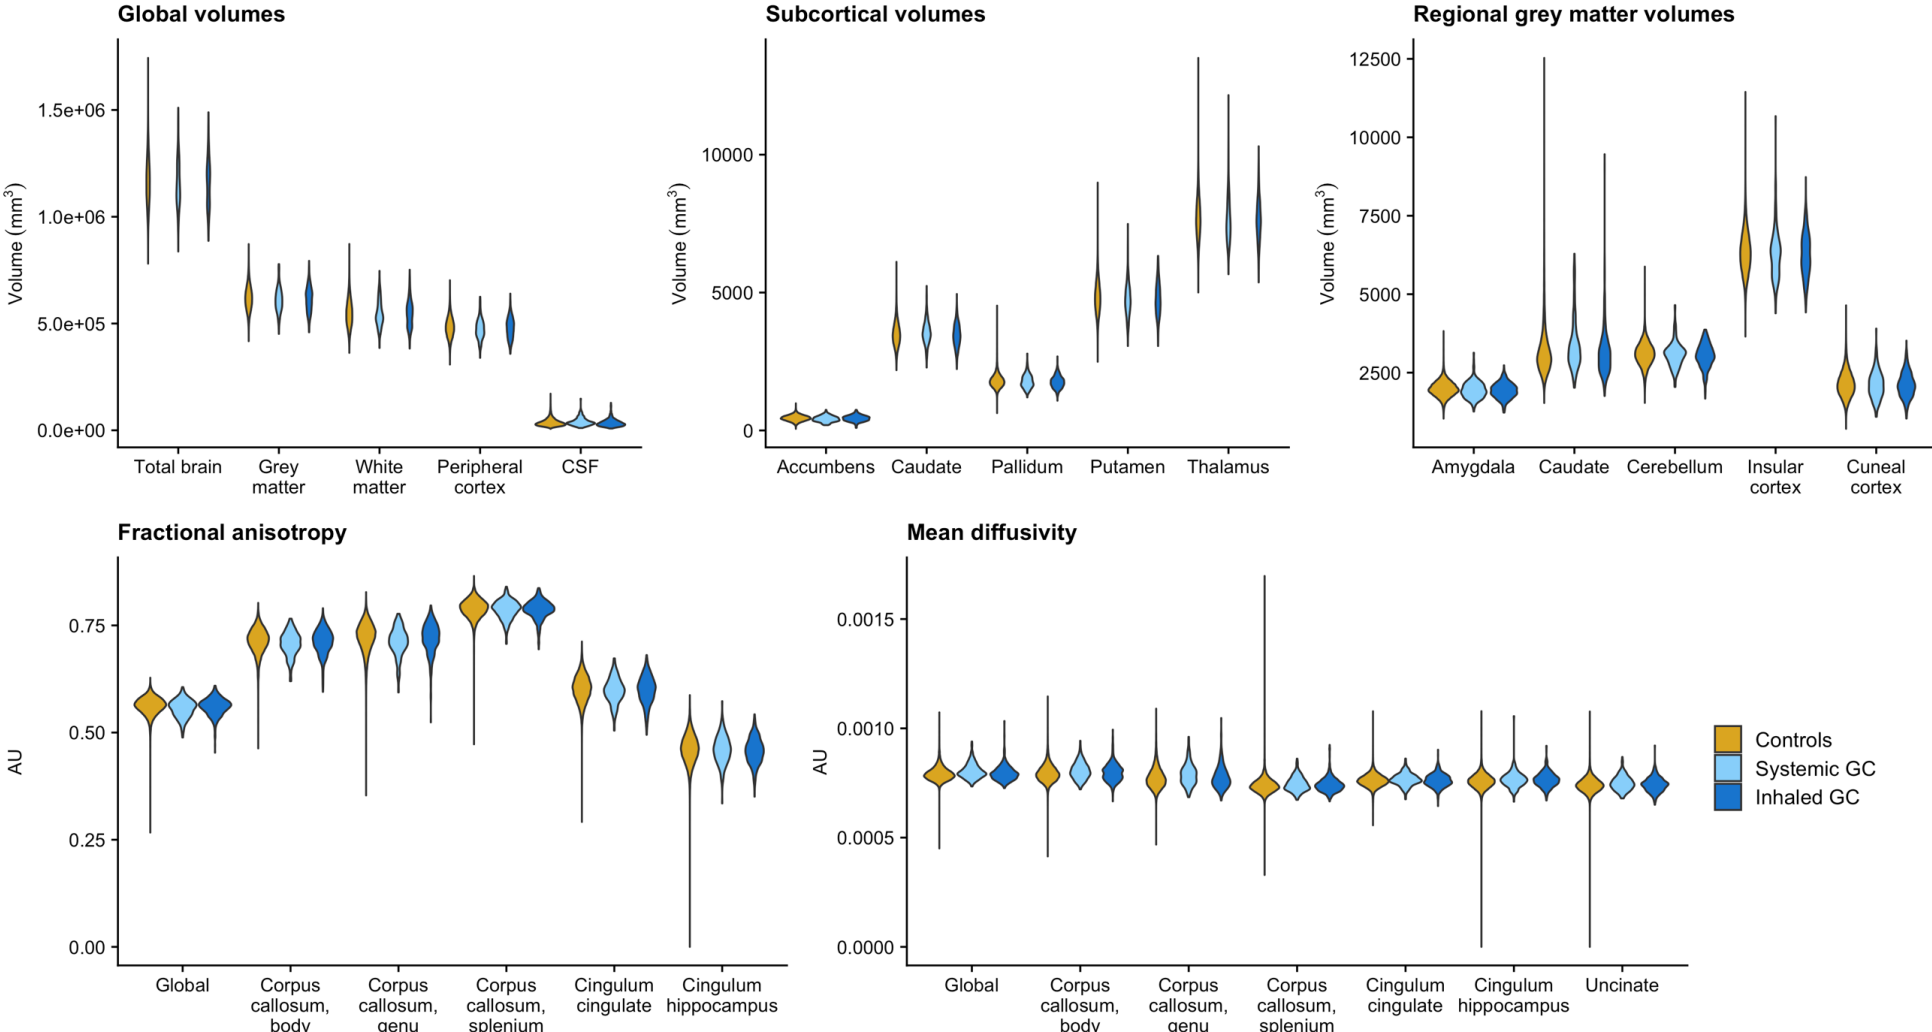

**Supplement 5.** Characteristics of included chronic glucocorticoid users and controls

|                                                    | Patients using chronic systemic GC<br>(n = 42) | Patients using chronic inhaled GC (n =<br>305) | Controls (n = 24106) | P value |
|----------------------------------------------------|------------------------------------------------|------------------------------------------------|----------------------|---------|
| <b>Sex: male, n (%)</b>                            | 22 (52.4%)                                     | 137 (44.9%)                                    | 12154 (50.4%)        | 0.15    |
| <b>Age at time of scanning in years, mean (SD)</b> | 65.2 (7.0)                                     | 63.0 (7.6)                                     | 63.5 (7.5)           | 0.19    |
| <b>Education level, n (%)</b>                      |                                                |                                                |                      | 0.81    |
| College/University degree                          | 24 (57.1)                                      | 171 (56.1)                                     | 12058 (50.0)         |         |
| A levels or equivalent                             | 6 (14.3)                                       | 38 (12.5)                                      | 2930 (12.2)          |         |
| O levels/GCSE or equivalent                        | 4 (9.5)                                        | 44 (14.4)                                      | 4155 (17.2)          |         |
| CSEs or equivalent                                 | 1 (2.4)                                        | 9 (3.0)                                        | 879 (3.6)            |         |
| NVQ, HND, HNC, or equivalent                       | 1 (2.4)                                        | 14 (4.6)                                       | 1396 (5.8)           |         |
| Other professional qualifications                  | 2 (4.8)                                        | 14 (4.6)                                       | 1150 (4.8)           |         |
| None of the above                                  | 1 (2.4)                                        | 14 (4.6)                                       | 1311 (5.4)           |         |
| Missing                                            | 3 (7.1)                                        | 1 (0.3)                                        | 227 (0.9)            |         |
| <b>BMI in kg/m<sup>2</sup>, mean (SD)</b>          | 25.9 (3.7)                                     | 26.6 (4.4)                                     | 26.1 (4.1)           | 0.15    |
| Number (%) missing                                 | 1 (2.4)                                        | 14 (4.6)                                       | 1325 (5.5)           |         |
| <b>Body fat percentage, mean (SD)</b>              | 30.0 (6.4)                                     | 32.0 (8.1)                                     | 30.2 (7.9)           | 4.6e-4  |
| Number (%) missing                                 | 1 (2.4)                                        | 14 (4.6)                                       | 1331 (5.5)           |         |
| <b>Smoking status, n (%)</b>                       |                                                |                                                |                      | 0.42    |
| Current                                            | 1 (2.4)                                        | 6 (2.0)                                        | 647 (2.7)            |         |
| Previous                                           | 8 (19.0)                                       | 112 (36.7)                                     | 7858 (32.6)          |         |
| Never                                              | 31 (73.8)                                      | 206 (67.5)                                     | 15380 (63.8)         |         |
| Missing                                            | 2 (4.8)                                        | 2 (0.7)                                        | 221 (0.9)            |         |

1  
2  
3  
4  
5  
6  
7  
8  
9  
10  
11  
12  
13  
14  
15  
16  
17  
18  
19  
20  
21  
22  
23  
24  
25  
26  
27  
28  
29  
30  
31  
32  
33  
34  
35  
36  
37  
38  
39  
40  
41  
42  
43  
44  
45  
46

BMI, body mass index; GC, glucocorticoids; n, number; SD, standard deviation.

P values were determined using analysis of variance (for continuous variables) and Fisher's exact test (for categorical variables, because of the low number of patients using chronic glucocorticoids).

For peer review only

**Supplement 6.** Imaging parameters, presented as the adjusted mean difference of patients using chronic systemic glucocorticoids (n = 42) or chronic inhaled glucocorticoids (n = 305) compared to controls (n = 24106)

|                                                         | ANOVA   |         |                  | Systemic GC vs. controls |               |         | Inhaled GC vs. controls |             |         |
|---------------------------------------------------------|---------|---------|------------------|--------------------------|---------------|---------|-------------------------|-------------|---------|
|                                                         | F value | P value | P <sub>FDR</sub> | AMD*                     | 95% CI        | P value | AMD*                    | 95% CI      | P value |
| <b><i>Volumetric measures</i></b>                       |         |         |                  |                          |               |         |                         |             |         |
| <i>Global volumes (in mm<sup>3</sup>)</i>               |         |         |                  |                          |               |         |                         |             |         |
| Total brain volume                                      | 17.0    | 4.1e-8  | <b>1.5e-6</b>    | -2535                    | -18869; 13798 | 0.90    | 3553                    | -2340; 9445 | 0.31    |
| Grey matter volume                                      | 12.2    | 5.0e-6  | <b>9.1e-5</b>    | -1552                    | -10808; 7703  | 0.89    | 1636                    | -1703; 4975 | 0.45    |
| White matter volume                                     | 10.8    | 2.0e-5  | <b>1.8e-4</b>    | -984                     | -11702; 9735  | 0.96    | 1917                    | -1950; 5784 | 0.44    |
| Peripheral cortex                                       | 8.5     | 2.1e-4  | <b>9.4e-4</b>    | -2152                    | -10481; 6177  | 0.78    | 940                     | -2065; 3945 | 0.70    |
| CSF volume                                              | 3.0     | 5.2e-2  | <b>7.4e-2</b>    | -2408                    | -7198; 2381   | 0.43    | 154                     | -1573; 1882 | 0.96    |
| <i>Subcortical volumes (in mm<sup>3</sup>)</i>          |         |         |                  |                          |               |         |                         |             |         |
| Amygdala                                                | 5.8     | 2.9e-3  | <b>8.2e-3</b>    | 52.1                     | -19.3; 123.5  | 0.19    | -20.6                   | -46.4; 5.2  | 0.14    |
| Caudate                                                 | 7.2     | 7.6e-4  | <b>2.9e-3</b>    | 112.7                    | -12.9; 238.2  | 0.09    | -5.0                    | -50.3; 40.3 | 0.95    |
| Hippocampus                                             | 4.9     | 7.8e-3  | <b>1.7e-2</b>    | 59.2                     | -79.1; 197.5  | 0.54    | -38.4                   | -88.3; 11.5 | 0.16    |
| Pallidum                                                | 7.1     | 7.9e-4  | <b>2.9e-3</b>    | 4.01                     | -68.2; 76.2   | 0.98    | -23.0                   | -49.0; 3.1  | 0.094   |
| Putamen                                                 | 5.0     | 6.9e-3  | <b>1.6e-2</b>    | -65.4                    | -222.8; 92.0  | 0.55    | -26.1                   | -82.9; 30.7 | 0.49    |
| Thalamus                                                | 6.7     | 1.3e-3  | <b>4.1e-3</b>    | 61.9                     | -120.7; 244.5 | 0.66    | -11.6                   | -77.5; 54.3 | 0.88    |
| <i>Regional grey matter volumes (in mm<sup>3</sup>)</i> |         |         |                  |                          |               |         |                         |             |         |
| Amygdala                                                | 10.1    | 4.2e-5  | <b>3.0e-4</b>    | 4.8                      | -60.8; 70.3   | 0.97    | -15.1                   | -38.8; 8.5  | 0.27    |
| Cerebellum                                              | 4.1     | 1.6e-2  | <b>2.9e-2</b>    | 25.7                     | -76.5; 127.9  | 0.79    | 4.4                     | -32.4; 41.3 | 0.94    |
| Cingulate gyrus, posterior                              | 4.2     | 1.6e-2  | <b>2.9e-2</b>    | 36.0                     | -158.8; 230.7 | 0.87    | 25.5                    | -44.8; 95.8 | 0.63    |

1  
2  
3  
4  
5  
6  
7  
8  
9  
10  
11  
12  
13  
14  
15  
16  
17  
18  
19  
20  
21  
22  
23  
24  
25  
26  
27  
28  
29  
30  
31  
32  
33  
34  
35  
36  
37  
38  
39  
40  
41  
42  
43  
44  
45  
46

|                              |      |        |               |         |                 |               |         |                  |               |
|------------------------------|------|--------|---------------|---------|-----------------|---------------|---------|------------------|---------------|
| Hippocampus                  | 9.1  | 1.1e-4 | <b>6.6e-4</b> | 63.5    | -52.4; 179.5    | 0.37          | -24.3   | -66.1; 17.6      | 0.34          |
| Precuneal cortex             | 8.6  | 1.8e-4 | <b>9.1e-4</b> | 170.0   | -201.0; 541.2   | 0.49          | -59.9   | -194.0; 74.1     | 0.51          |
| <b>DTI measures</b>          |      |        |               |         |                 |               |         |                  |               |
| <i>Fractional anisotropy</i> |      |        |               |         |                 |               |         |                  |               |
| Global                       | 5.4  | 4.4e-3 | <b>1.1e-2</b> | -0.0066 | -0.013; -3.2e-4 | <b>0.038</b>  | -0.0025 | -0.0048; -2.3e-4 | <b>0.027</b>  |
| Genu of corpus callosum      | 5.8  | 3.2e-3 | <b>8.2e-3</b> | -0.014  | -0.025; -0.0031 | <b>0.0087</b> | -0.0020 | -0.0060; 0.0020  | 0.44          |
| Cingulum hippocampus         | 3.7  | 2.4e-2 | <b>3.9e-2</b> | 0.0032  | -0.0078; 0.014  | 0.73          | -0.0034 | -0.0074; 6.4e-4  | 0.11          |
| <i>Mean diffusivity</i>      |      |        |               |         |                 |               |         |                  |               |
| Global                       | 4.7  | 9.5e-3 | <b>1.9e-2</b> | 9.4e-6  | 8.7e-8; 1.9e-5  | <b>0.05</b>   | 2.6e-6  | -7.7e-7; 6.0e-6  | 0.16          |
| Genu of corpus callosum      | 6.3  | 1.8e-3 | <b>5.3e-3</b> | 2.0e-5  | 5.5e-6; 3.5e-5  | <b>0.0043</b> | 2.8e-6  | -2.5e-6; 8.0e-6  | 0.40          |
| Splenium of corpus callosum  | 3.9  | 2.0e-2 | <b>3.5e-2</b> | 8.1e-6  | -2.4e-6; 1.9e-5 | 0.16          | 5.2e-6  | 1.4e-6; 9.0e-6   | <b>0.0044</b> |
| Cingulum hippocampus         | 11.6 | 9.0e-6 | <b>1.1e-4</b> | 8.2e-6  | -2.4e-6; 1.9e-5 | 0.16          | 6.3e-6  | 2.5e-6; 1.0e-5   | <b>5.0e-4</b> |

\* Adjusted mean difference, calculated using linear models, adjusted for age, sex, education, X-, Y-, and Z-position of the head in the scanner, head size, assessment centre, and year of imaging acquisition.

CI, confidence interval; P<sub>FDR</sub>, Benjamini-Hochberg false discovery rate corrected P values; SE, standard error. P values in bold are statistically significant (P < 0.05).

**Supplement 7.** Cognitive outcome measures of chronic systemic glucocorticoid users (n = 42) and chronic inhaled glucocorticoid users (n = 305) vs. controls

|                            | ANOVA   |         |                  | Systemic GC vs. controls |             | Inhaled GC vs. controls |       |             |         | Participants with available data, n (%) |            |            |
|----------------------------|---------|---------|------------------|--------------------------|-------------|-------------------------|-------|-------------|---------|-----------------------------------------|------------|------------|
|                            | F value | P value | P <sub>FDR</sub> | AMD*                     | 95% CI      | P value                 | AMD*  | 95% CI      | P value | Systemic GC                             | Inhaled GC | Controls   |
| <b>Trail making A</b>      | 0.41    | 0.66    | 0.84             | 0.12                     | -0.26; 0.51 | 0.69                    | -0.07 | -0.24; 0.10 | 0.55    | 30 (71)                                 | 151 (50)   | 16419 (68) |
| <b>Trail making B</b>      | 0.28    | 0.75    | 0.84             | -0.08                    | -0.47; 0.31 | 0.84                    | 0.00  | -0.17; 0.17 | 1.00    | 28 (67)                                 | 148 (49)   | 16071 (67) |
| <b>Symbol substitution</b> | 0.35    | 0.70    | 0.84             | -0.08                    | -0.45; 0.30 | 0.84                    | -0.05 | -0.21; 0.11 | 0.71    | 30 (71)                                 | 151 (50)   | 16442 (68) |

\* Adjusted mean difference between patients and controls, expressed in Z scores. Calculated using linear models, adjusting for age, sex, and education.

Trail making A, and trail making B were log transformed before generation of Z scores because they were non-normally distributed. Variables were transformed such that higher values indicate a better performance.

CI, confidence interval; GC, glucocorticoids; n, number; P<sub>FDR</sub>, Benjamini-Hochberg false discovery rate corrected P values



**Supplement 8.** Self-reported frequency of mental health parameters in the past two weeks of patients using systemic glucocorticoids (n = 222) or inhaled glucocorticoids (n = 557) and controls, presented as number of participants (%) per category

|                               | <b>Systemic GC<br/>(n=222)</b> | <b>Inhaled GC<br/>(n=557)</b> | <b>Controls<br/>(n=24106)</b> |
|-------------------------------|--------------------------------|-------------------------------|-------------------------------|
| <b>Depressed mood</b>         |                                |                               |                               |
| Not at all                    | 170 (77)                       | 455 (82)                      | 19940 (83)                    |
| Several days                  | 39 (18)                        | 77 (14)                       | 3017 (13)                     |
| More than half of the days    | 6 (2.7)                        | 8 (1.4)                       | 296 (1.2)                     |
| Nearly every day              | 1 (0.5)                        | 3 (0.5)                       | 150 (0.6)                     |
| Missing                       | 6 (2.7)                        | 14 (2.5)                      | 703 (2.9)                     |
| <b>Disinterest</b>            |                                |                               |                               |
| Not at all                    | 174 (78)                       | 468 (84)                      | 20536 (85)                    |
| Several days                  | 34 (15)                        | 61 (11)                       | 2568 (11)                     |
| More than half of the days    | 3 (1.3)                        | 7 (1.3)                       | 292 (1.2)                     |
| Nearly every day              | 5 (2.3)                        | 5 (0.9)                       | 174 (0.7)                     |
| Missing                       | 6 (2.7)                        | 16 (2.9)                      | 536 (2.2)                     |
| <b>Tenseness/restlessness</b> |                                |                               |                               |
| Not at all                    | 162 (73)                       | 437 (78)                      | 19412 (81)                    |
| Several days                  | 46 (21)                        | 89 (16)                       | 3630 (15)                     |
| More than half of the days    | 3 (1.3)                        | 12 (2.2)                      | 272 (1.1)                     |
| Nearly every day              | 5 (2.3)                        | 5 (0.9)                       | 126 (0.5)                     |
| Missing                       | 6 (2.7)                        | 14 (2.5)                      | 666 (2.8)                     |
| <b>Tiredness/lethargy</b>     |                                |                               |                               |
| Not at all                    | 95 (43)                        | 280 (50)                      | 13792 (57)                    |
| Several days                  | 91 (41)                        | 221 (40)                      | 8345 (35)                     |
| More than half of the days    | 9 (4.1)                        | 32 (5.7)                      | 815 (3.4)                     |
| Nearly every day              | 19 (8.6)                       | 15 (2.7)                      | 555 (2.3)                     |
| Missing                       | 8 (3.6)                        | 9 (1.6)                       | 599 (2.5)                     |

GC, glucocorticoids; n, number.

**Supplement 9.** Self-reported frequency of mental health parameters in the past two weeks of chronic systemic glucocorticoid users (n = 42), chronic inhaled glucocorticoid users (n = 305) and controls, presented as number of participants (%) per category

|                               | <b>Systemic GC<br/>(n = 42)</b> | <b>Inhaled GC<br/>(n = 305)</b> | <b>Controls<br/>(n = 24106)</b> |
|-------------------------------|---------------------------------|---------------------------------|---------------------------------|
| <b>Depressed mood</b>         |                                 |                                 |                                 |
| Not at all                    | 33 (79)                         | 257 (84)                        | 19940 (83)                      |
| Several days                  | 6 (14)                          | 35 (11)                         | 3017 (13)                       |
| More than half of the days    | 0 (0)                           | 3 (0.9)                         | 296 (1.2)                       |
| Nearly every day              | 0 (0)                           | 1 (0.3)                         | 150 (0.6)                       |
| Missing                       | 3 (7.1)                         | 9 (3.0)                         | 703 (2.9)                       |
| <b>Disinterest</b>            |                                 |                                 |                                 |
| Not at all                    | 34 (81)                         | 267 (88)                        | 20536 (85)                      |
| Several days                  | 6 (14)                          | 30 (9.8)                        | 2568 (11)                       |
| More than half of the days    | 0 (0)                           | 1 (0.3)                         | 292 (1.2)                       |
| Nearly every day              | 0 (0)                           | 0 (0)                           | 174 (0.7)                       |
| Missing                       | 2 (4.8)                         | 7 (2.3)                         | 536 (2.2)                       |
| <b>Tenseness/restlessness</b> |                                 |                                 |                                 |
| Not at all                    | 30 (71)                         | 245 (80)                        | 19412 (81)                      |
| Several days                  | 10 (24)                         | 48 (16)                         | 3630 (15)                       |
| More than half of the days    | 0 (0)                           | 6 (2.0)                         | 272 (1.1)                       |
| Nearly every day              | 0 (0)                           | 1 (0.3)                         | 126 (0.5)                       |
| Missing                       | 2 (4.8)                         | 5 (1.6)                         | 666 (2.8)                       |
| <b>Tiredness/lethargy</b>     |                                 |                                 |                                 |
| Not at all                    | 24 (57)                         | 156 (51)                        | 13792 (57)                      |
| Several days                  | 12 (29)                         | 121 (40)                        | 8345 (35)                       |
| More than half of the days    | 2 (4.8)                         | 14 (4.6)                        | 815 (3.4)                       |
| Nearly every day              | 2 (4.8)                         | 8 (2.6)                         | 555 (2.3)                       |
| Missing                       | 2 (4.8)                         | 6 (2.0)                         | 599 (2.5)                       |

GC, glucocorticoids; n, number.

**Supplement 10.** Likelihood of experiencing mental health complaints in the past two weeks of chronic systemic glucocorticoid users (n = 42) and chronic inhaled glucocorticoid users (n = 305) compared to controls

|                    | Likelihood ratio test |             |                  | Systemic GC vs. controls |            |         | Inhaled GC vs. controls |            |               |
|--------------------|-----------------------|-------------|------------------|--------------------------|------------|---------|-------------------------|------------|---------------|
|                    | X <sup>2</sup>        | P value     | P <sub>FDR</sub> | OR                       | 95% CI     | P value | OR                      | 95% CI     | P value       |
| <b>Depression</b>  | 1.1                   | 0.57        | 0.57             | 1.21                     | 0.45; 2.73 | 0.67    | 0.85                    | 0.59; 1.18 | 0.34          |
| <b>Disinterest</b> | 2.2                   | 0.33        | 0.44             | 1.41                     | 0.53; 3.17 | 0.44    | 0.79                    | 0.53; 1.13 | 0.21          |
| <b>Tenseness</b>   | 2.5                   | 0.28        | 0.44             | 1.84                     | 0.84; 3.68 | 0.10    | 1.05                    | 0.78; 1.40 | 0.73          |
| <b>Tiredness</b>   | 4.4                   | <b>0.11</b> | 0.44             | 0.96                     | 0.49; 1.84 | 0.91    | 1.28                    | 1.01; 1.61 | <b>0.0037</b> |

Calculated using logistic regression analysis, adjusting for age, sex, and education. P values in bold are statistically significant after Bonferroni correction for family-wise error rate of two tests (P < 0.025).

CI, confidence interval; GC, glucocorticoids; OR, odds ratio; P<sub>FDR</sub>, Benjamini-Hochberg false discovery rate corrected P values.

**Supplement 11.** Sensitivity analysis: Characteristics of included glucocorticoid users and controls (without exclusion of participants based on psychiatric, neurological, or endocrine history or medication use)

|                                                    | Patients using systemic GC (n = 312) | Patients using inhaled GC (n = 806) | Controls (n = 36310) | P value |
|----------------------------------------------------|--------------------------------------|-------------------------------------|----------------------|---------|
| <b>Sex: male, n (%)</b>                            | 145 (46.5)                           | 344 (42.7)                          | 17041 (46.9)         | 0.057   |
| <b>Age at time of scanning in years, mean (SD)</b> | 66.1 (6.9)                           | 62.8 (7.5)                          | 63.7 (7.5)           | 3.6e-10 |
| <b>Education level, n (%)</b>                      |                                      |                                     |                      | 0.37    |
| College/University degree                          | 143 (45.8)                           | 407 (50.5)                          | 17637 (48.6)         |         |
| A levels or equivalent                             | 39 (12.5)                            | 98 (12.2)                           | 4392 (12.1)          |         |
| O levels/GCSE or equivalent                        | 53 (17.0)                            | 136 (16.9)                          | 6400 (17.6)          |         |
| CSEs or equivalent                                 | 13 (4.2)                             | 26 (3.2)                            | 1372 (3.8)           |         |
| NVQ, HND, HNC, or equivalent                       | 11 (3.5)                             | 50 (6.2)                            | 2142 (5.9)           |         |
| Other professional qualifications                  | 21 (6.7)                             | 45 (5.6)                            | 1795 (4.9)           |         |
| None of the above                                  | 27 (8.7)                             | 40 (5.0)                            | 2208 (6.1)           |         |
| Missing                                            | 5 (1.6)                              | 4 (0.5)                             | 364 (1.0)            |         |
| <b>BMI in kg/m<sup>2</sup>, mean (SD)</b>          | 26.7 (4.4)                           | 27.1 (4.7)                          | 26.5 (4.4)           | 2.2e-4  |
| Number (%) missing                                 | 11 (3.5)                             | 31 (3.8)                            | 1932 (5.3)           |         |
| <b>Body fat percentage, mean (SD)</b>              | 31.9 (8.2)                           | 32.6 (8.4)                          | 31.1 (8.1)           | 5.5e-7  |
| Number (%) missing                                 | 11 (3.5)                             | 31 (3.8)                            | 1942 (5.3)           |         |
| <b>Smoking status, n (%)</b>                       |                                      |                                     |                      | 0.096   |
| Current                                            | 10 (3.2)                             | 25 (3.1)                            | 1231 (3.3)           |         |
| Previous                                           | 118 (37.8)                           | 299 (37.1)                          | 12063 (33.2)         |         |
| Never                                              | 181 (58.0)                           | 477 (59.2)                          | 22661 (62.4)         |         |
| Missing                                            | 3 (1.0)                              | 5 (0.6)                             | 355 (1.0)            |         |

1  
2  
3 BMI, body mass index; GC, glucocorticoids; n, number; SD, standard deviation.

4  
5 P values determined using analysis of variance (for continuous variables) and Pearson's Chi squared test (for categorical variables).  
6  
7  
8  
9  
10  
11  
12  
13  
14  
15  
16  
17  
18  
19  
20  
21  
22  
23  
24  
25  
26  
27  
28  
29  
30  
31  
32  
33  
34  
35  
36  
37  
38  
39  
40  
41  
42  
43  
44  
45  
46

For peer review only

**Supplement 12.** Sensitivity analysis: Imaging parameters, presented as the adjusted mean difference of patients using systemic glucocorticoids (n = 312) or inhaled glucocorticoids (n = 806) compared to controls (n = 36310) (without exclusion of participants based on psychiatric, neurological, or endocrine history or medication use)

|                                                         | ANOVA   |         |                  | Systemic GC vs. controls |             |               | Inhaled GC vs. controls |             |               |
|---------------------------------------------------------|---------|---------|------------------|--------------------------|-------------|---------------|-------------------------|-------------|---------------|
|                                                         | F value | P value | P <sub>FDR</sub> | AMD*                     | 95% CI      | P value       | AMD*                    | 95% CI      | P value       |
| <b><i>Volumetric measures</i></b>                       |         |         |                  |                          |             |               |                         |             |               |
| <i>Global volumes (in mm<sup>3</sup>)</i>               |         |         |                  |                          |             |               |                         |             |               |
| Total brain volume                                      | 17.7    | 2.2e-8  | <b>1.3e-7</b>    | -3460                    | -9320; 2400 | 0.32          | 3535                    | -121; 7190  | 0.060         |
| Grey matter volume                                      | 22.3    | 2.0e-10 | <b>2.4e-9</b>    | -2224                    | -5577; 1130 | 0.25          | 1454                    | -637; 3546  | 0.22          |
| White matter volume                                     | 5.5     | 4.1e-3  | <b>6.7e-3</b>    | -1237                    | -5078; 2604 | 0.69          | 2080                    | -316; 4476  | 0.10          |
| Peripheral cortex                                       | 24.6    | 2.0e-11 | <b>4.4e-10</b>   | -3318                    | -6330; -307 | <b>0.028</b>  | 1172                    | -706; 3051  | 0.29          |
| CSF volume                                              | 14.2    | 7.1e-7  | <b>2.3e-6</b>    | 1220                     | -518; 2958  | 0.12          | 223                     | -861; 1307  | 0.65          |
| <i>Subcortical volumes (in mm<sup>3</sup>)</i>          |         |         |                  |                          |             |               |                         |             |               |
| Accumbens                                               | 10.2    | 3.8e-5  | <b>1.0e-4</b>    | -8.9                     | -20.4; 2.7  | 0.16          | -3.7                    | -10.9; 3.5  | 0.41          |
| Caudate                                                 | 4.5     | 1.1e-2  | <b>1.7e-2</b>    | 58.6                     | 13.8; 103.5 | <b>0.0072</b> | -5.9                    | -33.9; 22.1 | 0.84          |
| Pallidum                                                | 6.9     | 1.0e-3  | <b>1.9e-3</b>    | 1.2                      | -24.5; 27.0 | 0.99          | -16.2                   | -32.3; -0.2 | <b>0.047</b>  |
| Putamen                                                 | 9.8     | 5.6e-5  | <b>1.5e-4</b>    | -33.8                    | -90.5; 22.9 | 0.32          | -20.1                   | -55.5; 15.3 | 0.35          |
| Thalamus                                                | 9.3     | 9.4e-5  | <b>2.3e-4</b>    | -19.9                    | -86.2; 46.5 | 0.72          | -10.7                   | -52.1; 30.7 | 0.78          |
| <i>Regional grey matter volumes (in mm<sup>3</sup>)</i> |         |         |                  |                          |             |               |                         |             |               |
| Amygdala                                                | 21.0    | 7.8e-10 | <b>7.0e-9</b>    | -6.7                     | -30.4; 17.1 | 0.75          | -21.7                   | -36.5; -6.8 | <b>0.0023</b> |
| Caudate                                                 | 12.3    | 4.7e-6  | <b>1.4e-5</b>    | 149.6                    | 66.9; 232.4 | <b>1.0e-4</b> | 42.9                    | -8.7; 94.5  | 0.12          |
| Cerebellum                                              | 5.8     | 3.1e-3  | <b>5.2e-3</b>    | 17.8                     | -19.4; 54.9 | 0.47          | -2.9                    | -26.1; 20.3 | 0.93          |

1  
2  
3  
4  
5  
6  
7  
8  
9  
10  
11  
12  
13  
14  
15  
16  
17  
18  
19  
20  
21  
22  
23  
24  
25  
26  
27  
28  
29  
30  
31  
32  
33  
34  
35  
36  
37  
38  
39  
40  
41  
42  
43  
44  
45  
46

|                              |      |         |                |         |                  |               |         |                  |               |
|------------------------------|------|---------|----------------|---------|------------------|---------------|---------|------------------|---------------|
| Insular cortex               | 8.7  | 1.7e-4  | <b>3.5e-4</b>  | -42.1   | -103.5; 19.4     | 0.23          | 8.0     | -30.3; 46.3      | 0.84          |
| Precuneal cortex             | 4.0  | 1.9e-2  | <b>2.7e-2</b>  | -9.7    | -142.8; 123.4    | 0.97          | -1.7    | -84.7; 81.3      | 1.00          |
| <b>DTI measures</b>          |      |         |                |         |                  |               |         |                  |               |
| <i>Fractional anisotropy</i> |      |         |                |         |                  |               |         |                  |               |
| Global                       | 15.5 | 1.8e-7  | <b>9.4e-7</b>  | -0.0031 | -0.0055; -7.5e-4 | <b>0.0066</b> | -0.0015 | -0.0030; -4.9e-5 | <b>0.041</b>  |
| Body of corpus callosum      | 8.9  | 1.4e-4  | <b>3.1e-4</b>  | -0.0039 | -0.0076; -0.0003 | <b>0.032</b>  | -0.0014 | -0.0036; 8.9e-4  | 0.30          |
| Genu of corpus callosum      | 15.2 | 2.5e-7  | <b>1.1e-6</b>  | -0.0056 | -0.0097; -0.0014 | <b>0.0055</b> | -0.0013 | -0.0039; 0.0013  | 0.44          |
| Cingulum cingulate           | 3.8  | 2.3e-2  | <b>3.1e-2</b>  | -0.0014 | -0.0052; 0.0025  | 0.64          | -0.0018 | -0.0042; 5.9e-4  | 0.17          |
| <i>Mean diffusivity</i>      |      |         |                |         |                  |               |         |                  |               |
| Global                       | 24.5 | 2.4e-11 | <b>4.4e-10</b> | 6.6e-6  | 3.0e-6; 1.0e-5   | <b>3.7e-5</b> | 1.9e-6  | -3.2e-7; 4.1e-6  | 5.7e-2        |
| Body of corpus callosum      | 14.2 | 6.7e-7  | <b>2.3e-6</b>  | 6.7e-6  | 1.9e-6; 1.1e-5   | <b>0.0034</b> | 4.0e-6  | 1.1e-6; 7.0e-6   | <b>0.0048</b> |
| Genu of corpus callosum      | 17.9 | 1.7e-8  | <b>1.2e-7</b>  | 8.0e-6  | 2.5e-6; 1.4e-5   | <b>0.0023</b> | 3.3e-6  | -1.4e-7; 6.7e-6  | 0.0622        |
| Splenium of corpus callosum  | 6.7  | 1.2e-3  | <b>2.2e-3</b>  | 3.7e-6  | -3.1e-7; 7.6e-6  | 0.076         | 4.0e-6  | 1.5e-6; 6.4e-6   | <b>7.0e-4</b> |
| Cingulum cingulate           | 4.9  | 7.6e-3  | <b>1.2e-2</b>  | 2.5e-6  | -6.8e-7; 5.7e-6  | 0.15          | 2.2e-6  | 2.2e-7; 4.2e-6   | <b>0.026</b>  |
| Cingulum hippocampus         | 14.5 | 4.9e-7  | <b>2.0e-6</b>  | 2.6e-6  | -1.3e-6; 6.6e-6  | 0.25          | 4.5e-6  | 2.0e-6; 7.0e-6   | <b>1.0e-4</b> |
| Uncinate fasciculus          | 7.3  | 6.6e-4  | <b>1.3e-3</b>  | 4.0e-6  | 2.9e-7; 7.7e-6   | <b>0.032</b>  | 1.6e-6  | -7.5e-7; 3.9e-6  | 0.23          |

\* Adjusted mean difference, calculated using linear models, adjusted for age, sex, education, X-, Y-, and Z-position of the head in the scanner, head size, assessment centre, and year of imaging acquisition.

P<sub>FDR</sub>, Benjamini-Hochberg false discovery rate corrected P values; SE, standard error. P values in bold are statistically significant (P < 0.05).

**Supplement 13.** Sensitivity analysis: Cognitive outcome measures of systemic glucocorticoid users (n = 312) and inhaled glucocorticoid users (n = 806) vs. controls (n = 36310) (without exclusion of participants based on psychiatric, neurological, or endocrine history or medication use)

|                            | ANOVA   |         |                  | Systemic GC vs. controls |              |              | Inhaled GC vs. controls |             |         | Participants with available data, n (%) |            |            |
|----------------------------|---------|---------|------------------|--------------------------|--------------|--------------|-------------------------|-------------|---------|-----------------------------------------|------------|------------|
|                            | F value | P value | P <sub>FDR</sub> | AMD*                     | 95% CI       | P value      | AMD*                    | 95% CI      | P value | Systemic GC                             | Inhaled GC | Controls   |
| <b>Trail making A</b>      | 6.6     | 0.0014  | <b>0.0028</b>    | -0.11                    | -0.26; 0.03  | 0.16         | 0.020                   | -0.08; 0.12 | 0.86    | 206 (66)                                | 422 (52)   | 24297 (67) |
| <b>Trail making B</b>      | 6.7     | 0.0013  | <b>0.0028</b>    | -0.12                    | -0.27; 0.02  | 0.10         | -0.018                  | -0.12; 0.08 | 0.88    | 194 (62)                                | 415 (51)   | 23273 (64) |
| <b>Symbol substitution</b> | 9.7     | 6.2e-5  | <b>0.00037</b>   | -0.15                    | -0.29; -0.01 | <b>0.029</b> | -0.061                  | -0.16; 0.04 | 0.28    | 203 (65)                                | 423 (52)   | 24337 (67) |

\* Adjusted mean difference between patients and controls, expressed in Z scores. Calculated using linear models, adjusted for age, sex, and education. Trail making A, and trail making B were log transformed before generation of Z scores because they were non-normally distributed. Variables were transformed such that higher values indicate a better performance.

GC, glucocorticoids; P<sub>FDR</sub>, Benjamini-Hochberg false discovery rate corrected P values.



**Supplement 14.** Sensitivity analysis: Self-reported frequency of mental health parameters in the past two weeks of patients using systemic glucocorticoids (n = 312) or inhaled glucocorticoids (n = 806) and controls, presented as number of participants (%) per category (without exclusion of participants based on psychiatric, neurological, or endocrine history or medication use)

|                               | <b>Systemic GC<br/>(n = 312)</b> | <b>Inhaled GC<br/>(n = 806)</b> | <b>Controls<br/>(n = 36310)</b> |
|-------------------------------|----------------------------------|---------------------------------|---------------------------------|
| <b>Depressed mood</b>         |                                  |                                 |                                 |
| Not at all                    | 240 (76.9)                       | 620 (76.9)                      | 29014 (80.0)                    |
| Several days                  | 55 (17.6)                        | 139 (17.2)                      | 5197 (14.3)                     |
| More than half of the days    | 8 (2.6)                          | 14 (1.7)                        | 593 (1.6)                       |
| Nearly every day              | 2 (0.6)                          | 14 (1.7)                        | 360 (1.0)                       |
| Missing                       | 7 (2.2)                          | 19 (2.4)                        | 1146 (3.2)                      |
| <b>Disinterest</b>            |                                  |                                 |                                 |
| Not at all                    | 237 (76.0)                       | 639 (79.3)                      | 29916 (82.4)                    |
| Several days                  | 55 (17.6)                        | 118 (14.6)                      | 4583 (12.6)                     |
| More than half of the days    | 8 (2.6)                          | 17 (2.1)                        | 604 (1.7)                       |
| Nearly every day              | 5 (1.6)                          | 12 (1.5)                        | 357 (1.0)                       |
| Missing                       | 7 (2.2)                          | 20 (2.5)                        | 850 (2.3)                       |
| <b>Tenseness/restlessness</b> |                                  |                                 |                                 |
| Not at all                    | 221 (70.8)                       | 588 (73.0)                      | 28266 (77.8)                    |
| Several days                  | 71 (22.8)                        | 157 (19.5)                      | 6113 (16.8)                     |
| More than half of the days    | 6 (1.9)                          | 23 (2.9)                        | 565 (1.6)                       |
| Nearly every day              | 6 (1.9)                          | 16 (2.0)                        | 313 (0.9)                       |
| Missing                       | 8 (2.6)                          | 22 (2.7)                        | 1053 (2.9)                      |
| <b>Tiredness/lethargy</b>     |                                  |                                 |                                 |
| Not at all                    | 125 (40.0)                       | 366 (45.4)                      | 19107 (52.6)                    |
| Several days                  | 130 (41.7)                       | 321 (39.8)                      | 13373 (36.8)                    |
| More than half of the days    | 22 (7.1)                         | 53 (6.6)                        | 1533 (4.2)                      |
| Nearly every day              | 26 (8.3)                         | 51 (6.3)                        | 1358 (3.7)                      |
| Missing                       | 9 (2.9)                          | 15 (1.9)                        | 939 (2.6)                       |

GC, glucocorticoids; n, number.

**Supplement 15.** Sensitivity analysis: Likelihood of experiencing mental health complaints in the past two weeks of systemic glucocorticoid users (n = 312) and inhaled glucocorticoid users (n = 806) compared to controls (without exclusion of participants based on psychiatric, neurological, or endocrine history or medication use)

|                    | Likelihood ratio test |         |           | Systemic GC vs. controls |            |                | Inhaled GC vs. controls |            |               |
|--------------------|-----------------------|---------|-----------|--------------------------|------------|----------------|-------------------------|------------|---------------|
|                    | $\chi^2$              | P value | $P_{FDR}$ | OR                       | 95% CI     | P value        | OR                      | 95% CI     | P value       |
| <b>Depression</b>  | 11.1                  | 0.0039  | 0.0039    | 1.44                     | 1.08; 1.89 | <b>0.010</b>   | 1.23                    | 1.03; 1.46 | <b>0.023</b>  |
| <b>Disinterest</b> | 17.8                  | 1.4e-4  | 1.9e-04   | 1.73                     | 1.31; 2.27 | <b>8.5e-05</b> | 1.21                    | 1.00; 1.45 | 0.041         |
| <b>Tenseness</b>   | 24.0                  | 6.1e-06 | 1.2e-05   | 1.68                     | 1.29; 2.16 | <b>7.0e-05</b> | 1.31                    | 1.11; 1.54 | <b>0.0014</b> |
| <b>Tiredness</b>   | 39.2                  | 3.1e-09 | 1.2e-08   | 1.79                     | 1.42; 2.27 | <b>9.0e-07</b> | 1.33                    | 1.15; 1.53 | <b>1.1e-4</b> |

Calculated using logistic regression analysis, adjusting for age, sex, and education. P values in bold are statistically significant after Bonferroni correction for family-wise error rate of two tests ( $P < 0.025$ ).

CI, confidence interval; GC, glucocorticoids; OR, odds ratio;  $P_{FDR}$ , Benjamini-Hochberg false discovery rate corrected P values.

**Supplement 16.** Sensitivity analysis: Imaging parameters, presented as the adjusted mean difference of patients using systemic glucocorticoids (n = 222) or inhaled glucocorticoids (n = 557) compared to controls (n = 24106) (after exclusion of outlier values per group per variable)

|                                                         | ANOVA   |         |                  | Systemic GC vs. controls |              |                   | Inhaled GC vs. controls |             |             |
|---------------------------------------------------------|---------|---------|------------------|--------------------------|--------------|-------------------|-------------------------|-------------|-------------|
|                                                         | F value | P value | P <sub>FDR</sub> | AMD*                     | 95% CI       | P value           | AMD*                    | 95% CI      | P value     |
| <b><i>Volumetric measures</i></b>                       |         |         |                  |                          |              |                   |                         |             |             |
| <i>Global volumes (in mm<sup>3</sup>)</i>               |         |         |                  |                          |              |                   |                         |             |             |
| Total brain volume                                      | 16.0    | 1.1e-7  | <b>4.6e-7</b>    | -3991                    | -10852; 2869 | 0.33              | 3756                    | -565; 8076  | 0.10        |
| Grey matter volume                                      | 28.8    | 3.4e-13 | <b>6.1e-12</b>   | -3143                    | -7081; 794   | 0.14              | 1120                    | -1337; 3576 | 0.50        |
| White matter volume                                     | 5.4     | 4.6e-3  | <b>7.1e-3</b>    | -1861                    | -6349; 2626  | 0.55              | 2374                    | -454; 5203  | 0.11        |
| Peripheral cortex                                       | 27.0    | 2.0e-12 | <b>1.8e-11</b>   | -4412                    | -7948; -876  | <b>0.011</b>      | 1148                    | -1058; 3355 | 0.41        |
| CSF volume                                              | 16.8    | 5.0e-8  | <b>2.3e-7</b>    | 1437                     | -210; 3084   | 0.10              | -449                    | -1492; 594  | 0.53        |
| <i>Subcortical volumes (in mm<sup>3</sup>)</i>          |         |         |                  |                          |              |                   |                         |             |             |
| Accumbens                                               | 13.0    | 2.3e-6  | <b>5.8e-6</b>    | -15.6                    | -28.8; -2.3  | <b>0.018</b>      | -4.6                    | -13.0; 3.7  | 0.37        |
| Caudate                                                 | 4.7     | 8.8e-3  | <b>1.1e-2</b>    | 69.4                     | 18.4; 120.3  | <b>0.0049</b>     | 4.5                     | -27.4; 36.3 | 0.92        |
| Hippocampus                                             | 5.4     | 4.7e-3  | <b>7.1e-3</b>    | -17.1                    | -71.2; 37.0  | 0.70              | -17                     | -51.3; 17.3 | 0.44        |
| Pallidum                                                | 4.9     | 7.4e-3  | <b>9.8e-3</b>    | 5.7                      | -20.5; 31.8  | 0.83              | -9.8                    | -26.3; 6.7  | 0.32        |
| Putamen                                                 | 13.7    | 1.1e-6  | <b>3.4e-6</b>    | -63                      | -127.1; 1.0  | 0.055             | -19.9                   | -59.7; 20.0 | 0.44        |
| Thalamus                                                | 10.0    | 4.6e-5  | <b>8.7e-5</b>    | -25.6                    | -98.2; 46.9  | 0.64              | -0.6                    | -46.2; 45.1 | 1.00        |
| <i>Regional grey matter volumes (in mm<sup>3</sup>)</i> |         |         |                  |                          |              |                   |                         |             |             |
| Amygdala                                                | 28.3    | 5.1e-13 | <b>6.1e-12</b>   | -17.2                    | -43.8; 9.4   | 0.26              | -22.6                   | -39.3; -5.9 | <b>0.01</b> |
| Caudate                                                 | 12.6    | 3.5e-6  | <b>8.4e-6</b>    | 138.1                    | 67.7; 208.6  | <b>&lt;0.0001</b> | 15.1                    | -28.8; 59.1 | 0.66        |
| Cerebellum                                              | 10.3    | 3.3e-5  | <b>6.6e-5</b>    | -1.1                     | -42.8; 40.6  | 1.00              | -6.6                    | -32.5; 19.3 | 0.78        |

|                              |      |         |                |          |                  |                   |         |                  |               |
|------------------------------|------|---------|----------------|----------|------------------|-------------------|---------|------------------|---------------|
| Cingulate gyrus, anterior    | 3.9  | 2.1e-2  | <b>2.6e-2</b>  | 110.5    | -7.8; 229.0      | 0.071             | 27.1    | -47.9; 102.0     | 0.63          |
| Hippocampus                  | 3.3  | 3.9e-2  | <b>4.6e-2</b>  | 24.3     | -22.4; 70.9      | 0.41              | 2.4     | -27.0; 31.8      | 0.97          |
| Insular cortex               | 13.1 | 2.0e-6  | <b>5.5e-6</b>  | -74.8    | -143.2; -6.4     | <b>0.029</b>      | 8.7     | -34.1; 51.4      | 0.85          |
| Precuneal cortex             | 5.2  | 5.4e-3  | <b>7.5e-3</b>  | -60.1    | -213.6; 93.3     | 0.59              | 0.0     | -95.6; 95.6      | 1.00          |
| <b><i>DTI measures</i></b>   |      |         |                |          |                  |                   |         |                  |               |
| <i>Fractional anisotropy</i> |      |         |                |          |                  |                   |         |                  |               |
| Global                       | 22.7 | 1.4e-10 | <b>1.0e-9</b>  | -0.0043  | -0.0067; -0.0018 | <b>2.0e-4</b>     | -0.0019 | -0.0035; -3.4e-4 | <b>0.013</b>  |
| Body of corpus callosum      | 11.4 | 1.1e-5  | <b>2.5e-5</b>  | -0.0048  | -0.0086; -0.0010 | <b>0.0097</b>     | -0.0021 | -0.0045; 3.4e-4  | 0.11          |
| Genu of corpus callosum      | 15.3 | 2.3e-7  | <b>8.4e-7</b>  | -0.0059  | -0.010; -0.0016  | <b>0.0048</b>     | -0.0017 | -0.0044; 0.0010  | 0.28          |
| Cingulum cingulate           | 6.5  | 1.5e-3  | <b>2.5e-3</b>  | -0.0022  | -0.0065; 0.0021  | 0.42              | -0.0026 | -0.0053; 9.7e-5  | 0.061         |
| Cingulum hippocampus         | 7.5  | 5.7e-4  | <b>9.7e-4</b>  | -0.00012 | -0.0046; 0.0044  | 1.00              | -0.0036 | -0.0064; -7.5e-4 | <b>0.010</b>  |
| <i>Mean diffusivity</i>      |      |         |                |          |                  |                   |         |                  |               |
| Global                       | 29.1 | 2.4e-13 | <b>6.1e-12</b> | 7.1e-6   | 3.7e-6; 1.1e-5   | <b>&lt;0.0001</b> | 2.5e-6  | 3.1e-7; 4.7e-6   | <b>0.022</b>  |
| Body of corpus callosum      | 17.1 | 3.6e-8  | <b>1.9e-7</b>  | 7.5e-6   | 2.8e-6; 1.2e-5   | <b>7.0e-4</b>     | 3.7e-6  | 6.9e-7; 6.6e-6   | <b>0.012</b>  |
| Genu of corpus callosum      | 21.6 | 4.3e-10 | <b>2.6e-9</b>  | 9.5e-6   | 3.9e-6; 1.5e-5   | <b>3.0e-4</b>     | 3.6e-6  | 2.9e-8; 7.1e-6   | <b>0.048</b>  |
| Splenium of corpus callosum  | 9.9  | 5.2e-5  | <b>9.4e-5</b>  | 4.6e-6   | 7.3e-7; 8.4e-6   | <b>0.016</b>      | 4.2e-6  | 1.8e-6; 6.7e-6   | <b>2.0e-4</b> |
| Cingulum cingulate           | 5.3  | 5.2e-3  | <b>7.5e-3</b>  | 2.6e-6   | -9.4e-7; 6.1e-6  | 0.19              | 2.6e-6  | 3.6e-7; 4.8e-6   | <b>0.019</b>  |
| Cingulum hippocampus         | 13.7 | 1.1e-6  | <b>3.4e-6</b>  | 4.4e-6   | 2.5e-7; 8.6e-6   | <b>0.035</b>      | 4.3e-6  | 1.6e-6; 6.9e-6   | <b>6.0e-4</b> |
| Uncinate fasciculus          | 11.3 | 1.2e-5  | <b>2.5e-5</b>  | 5.8e-6   | 1.9e-6; 9.7e-6   | <b>0.0018</b>     | 2.4e-6  | -8.8e-8; 4.8e-6  | 0.061         |

\* Adjusted mean difference, calculated using linear models, adjusted for age, sex, education, X-, Y-, and Z-position of the head in the scanner, head size, assessment centre, and year of imaging acquisition.

P<sub>FDR</sub>, Benjamini-Hochberg false discovery rate corrected P values; SE, standard error. P values in bold are statistically significant (P < 0.05).

**Supplement 17.** Cognitive outcome measures of systemic glucocorticoid users (n = 222) and inhaled glucocorticoid users (n = 557) vs. controls (after exclusion of outlier values per group per variable)

|                            | ANOVA   |         |                  | Systemic GC vs. controls |              |              | Inhaled GC vs. controls |             |         | Participants with available data, n (%) |            |            |
|----------------------------|---------|---------|------------------|--------------------------|--------------|--------------|-------------------------|-------------|---------|-----------------------------------------|------------|------------|
|                            | F value | P value | P <sub>FDR</sub> | AMD*                     | 95% CI       | P value      | AMD*                    | 95% CI      | P value | Systemic GC                             | Inhaled GC | Controls   |
| <b>Trail making A</b>      | 5.2     | 0.0057  | <b>0.011</b>     | -0.10                    | -0.25; 0.05  | 0.25         | -0.018                  | -0.12; 0.09 | 0.88    | 143 (64)                                | 286 (51)   | 15996 (66) |
| <b>Trail making B</b>      | 9.6     | 6.8e-5  | <b>2.0e-4</b>    | -0.16                    | -0.32; -0.01 | <b>0.038</b> | -0.064                  | -0.17; 0.04 | 0.31    | 137 (62)                                | 289 (52)   | 15733 (65) |
| <b>Symbol substitution</b> | 11.6    | 8.9e-6  | <b>5.3e-5</b>    | -0.18                    | -0.34; -0.02 | <b>0.021</b> | -0.046                  | -0.16; 0.06 | 0.55    | 141 (64)                                | 295 (53)   | 16270 (67) |

\* Adjusted mean difference between patients and controls, expressed in Z scores. Calculated using linear models, adjusted for age, sex, and education. Trail making A, and trail making B were log transformed before generation of Z scores because they were non-normally distributed. Variables were transformed such that higher values indicate a better performance.

GC, glucocorticoids; P<sub>FDR</sub>, Benjamini-Hochberg false discovery rate corrected P values.

**Supplement 18.** STROBE Statement – Checklist of items that should be included in reports of cohort studies

|                              | Item No | Recommendation                                                                                                                                                                       | Where to be found                                                                          |
|------------------------------|---------|--------------------------------------------------------------------------------------------------------------------------------------------------------------------------------------|--------------------------------------------------------------------------------------------|
| <b>Title and abstract</b>    | 1       | (a) Indicate the study's design with a commonly used term in the title or the abstract                                                                                               | Abstract: Design (p.2)                                                                     |
|                              |         | (b) Provide in the abstract an informative and balanced summary of what was done and what was found                                                                                  | Abstract: Main outcome measures, Results (p.2)                                             |
| <b>Introduction</b>          |         |                                                                                                                                                                                      |                                                                                            |
| Background/<br>rationale     | 2       | Explain the scientific background and rationale for the investigation being reported                                                                                                 | Introduction (p.4)                                                                         |
| Objectives                   | 3       | State specific objectives, including any prespecified hypotheses                                                                                                                     | Introduction (p.4)                                                                         |
| <b>Methods</b>               |         |                                                                                                                                                                                      |                                                                                            |
| Study design                 | 4       | Present key elements of study design early in the paper                                                                                                                              | Study design (p.5)                                                                         |
| Setting                      | 5       | Describe the setting, locations, and relevant dates, including periods of recruitment, exposure, follow-up, and data collection                                                      | Study design, Data collection (p.5)                                                        |
| Participants                 | 6       | (a) Give the eligibility criteria, and the sources and methods of selection of participants. Describe methods of follow-up                                                           | Participants (pp.5-6)                                                                      |
|                              |         | (b) For matched studies, give matching criteria and number of exposed and unexposed                                                                                                  | <i>Not applicable</i>                                                                      |
| Variables                    | 7       | Clearly define all outcomes, exposures, predictors, potential confounders, and effect modifiers. Give diagnostic criteria, if applicable                                             | Data collection, Imaging data, Cognitive and Emotional data, Statistical analysis (pp.5-9) |
| Data sources/<br>measurement | 8       | For each variable of interest, give sources of data and details of methods of assessment (measurement). Describe comparability of assessment methods if there is more than one group | Data collection, Imaging data, Cognitive and Emotional data (pp.5-7)                       |
| Bias                         | 9       | Describe any efforts to address potential sources of bias                                                                                                                            | Statistical analysis (pp.7-9)                                                              |
| Study size                   | 10      | Explain how the study size was arrived at                                                                                                                                            | Participants (pp.5-6)                                                                      |
| Quantitative variables       | 11      | Explain how quantitative variables were handled in the analyses. If applicable, describe which groupings were chosen and why                                                         | Statistical analysis (pp.7-9)                                                              |
| Statistical methods          | 12      | (a) Describe all statistical methods, including those used to control for confounding                                                                                                | Statistical analysis (pp.7-9)                                                              |
|                              |         | (b) Describe any methods used to examine subgroups and interactions                                                                                                                  |                                                                                            |
|                              |         | (c) Explain how missing data were addressed                                                                                                                                          |                                                                                            |
|                              |         | (d) If applicable, explain how loss to follow-up was addressed                                                                                                                       |                                                                                            |
|                              |         | (e) Describe any sensitivity analyses                                                                                                                                                |                                                                                            |

| <b>Results</b>           |     |                                                                                                                                                                                                                                                                                                                                                                                                                 |                                                                                                    |
|--------------------------|-----|-----------------------------------------------------------------------------------------------------------------------------------------------------------------------------------------------------------------------------------------------------------------------------------------------------------------------------------------------------------------------------------------------------------------|----------------------------------------------------------------------------------------------------|
| Participants             | 13  | (a) Report numbers of individuals at each stage of study – e.g. numbers potentially eligible, examined for eligibility, confirmed eligible, included in the study, completing follow-up, and analyzed<br>(b) Give reasons for non-participation at each stage<br>(c) Consider use of a flow diagram                                                                                                             | Demographic characteristics (p.10) and Figure 1                                                    |
| Descriptive data         | 14  | (a) Give characteristics of study participants (e.g. demographic, clinical, social) and information on exposures and potential confounders<br>(b) Indicate number of participants with missing data for each variable of interest<br>(c) Summarize follow-up time (e.g., average and total amount)                                                                                                              | Demographic characteristics (p.10) and Table 1<br><i>Not applicable</i>                            |
| Outcome data             | 15* | Report numbers of outcome events or summary measures over time                                                                                                                                                                                                                                                                                                                                                  | Results (pp.12-19)                                                                                 |
| Main results             | 16  | (a) Give unadjusted estimates and, if applicable, confounder-adjusted estimates and their precision (e.g., 95% confidence interval). Make clear which confounders were adjusted for and why they were included<br>(b) Report category boundaries when continuous variables were categorized<br>(c) If relevant, consider translating estimates of relative risk into absolute risk for a meaningful time period | Results (pp.12-19), Tables 2-4, Supplements<br>Statistical analysis (p.8)<br><i>Not applicable</i> |
| Other analyses           | 17  | Report other analyses done – e.g. analyses of subgroups and interactions, and sensitivity analyses                                                                                                                                                                                                                                                                                                              | Results (p.20), Supplements                                                                        |
| <b>Discussion</b>        |     |                                                                                                                                                                                                                                                                                                                                                                                                                 |                                                                                                    |
| Key results              | 18  | Summarize key results with reference to study objectives                                                                                                                                                                                                                                                                                                                                                        | Discussion (pp.21-22)                                                                              |
| Limitations              | 19  | Discuss limitations of the study, taking into account sources of potential bias or imprecision. Discuss both direction and magnitude of any potential bias                                                                                                                                                                                                                                                      | Strengths and limitations (pp.23-25)                                                               |
| Interpretation           | 20  | Give a cautious overall interpretation of results considering objectives, limitations, multiplicity of analyses, results from similar studies, and other relevant evidence                                                                                                                                                                                                                                      | Findings in context, Potential consequences and implications (pp.21-23)                            |
| Generalizability         | 21  | Discuss the generalizability (external validity) of the study results                                                                                                                                                                                                                                                                                                                                           | Strengths and limitations (pp.23-25)                                                               |
| <b>Other information</b> |     |                                                                                                                                                                                                                                                                                                                                                                                                                 |                                                                                                    |
| Funding                  | 22  | Give the source of funding and the role of the funders for the present study and, if applicable, for the original study on which the present article is based                                                                                                                                                                                                                                                   | Funding (p.26)                                                                                     |

## STROBE Statement – Checklist of items that should be included in reports of cohort studies

|                              | Item No | Recommendation                                                                                                                                                                       | Where to be found                                                                          |
|------------------------------|---------|--------------------------------------------------------------------------------------------------------------------------------------------------------------------------------------|--------------------------------------------------------------------------------------------|
| <b>Title and abstract</b>    | 1       | (a) Indicate the study's design with a commonly used term in the title or the abstract                                                                                               | Abstract: Design (p.2)                                                                     |
|                              |         | (b) Provide in the abstract an informative and balanced summary of what was done and what was found                                                                                  | Abstract: Main outcome measures, Results (p.2)                                             |
| <b>Introduction</b>          |         |                                                                                                                                                                                      |                                                                                            |
| Background/<br>rationale     | 2       | Explain the scientific background and rationale for the investigation being reported                                                                                                 | Introduction (p.4)                                                                         |
| Objectives                   | 3       | State specific objectives, including any prespecified hypotheses                                                                                                                     | Introduction (p.4)                                                                         |
| <b>Methods</b>               |         |                                                                                                                                                                                      |                                                                                            |
| Study design                 | 4       | Present key elements of study design early in the paper                                                                                                                              | Study design (p.5)                                                                         |
| Setting                      | 5       | Describe the setting, locations, and relevant dates, including periods of recruitment, exposure, follow-up, and data collection                                                      | Study design, Data collection (p.5)                                                        |
| Participants                 | 6       | (a) Give the eligibility criteria, and the sources and methods of selection of participants. Describe methods of follow-up                                                           | Participants (pp.5-6)                                                                      |
|                              |         | (b) For matched studies, give matching criteria and number of exposed and unexposed                                                                                                  | <i>Not applicable</i>                                                                      |
| Variables                    | 7       | Clearly define all outcomes, exposures, predictors, potential confounders, and effect modifiers. Give diagnostic criteria, if applicable                                             | Data collection, Imaging data, Cognitive and Emotional data, Statistical analysis (pp.5-9) |
| Data sources/<br>measurement | 8       | For each variable of interest, give sources of data and details of methods of assessment (measurement). Describe comparability of assessment methods if there is more than one group | Data collection, Imaging data, Cognitive and Emotional data (pp.5-7)                       |
| Bias                         | 9       | Describe any efforts to address potential sources of bias                                                                                                                            | Statistical analysis (pp.7-9)                                                              |
| Study size                   | 10      | Explain how the study size was arrived at                                                                                                                                            | Participants (pp.5-6)                                                                      |
| Quantitative variables       | 11      | Explain how quantitative variables were handled in the analyses. If applicable, describe which groupings were chosen and why                                                         | Statistical analysis (pp.7-9)                                                              |
| Statistical methods          | 12      | (a) Describe all statistical methods, including those used to control for confounding                                                                                                | Statistical analysis (pp.7-9)                                                              |
|                              |         | (b) Describe any methods used to examine subgroups and interactions                                                                                                                  |                                                                                            |
|                              |         | (c) Explain how missing data were addressed                                                                                                                                          |                                                                                            |
|                              |         | (d) If applicable, explain how loss to follow-up was addressed                                                                                                                       |                                                                                            |
|                              |         | (e) Describe any sensitivity analyses                                                                                                                                                |                                                                                            |



1  
2  
3  
4  
5  
6  
7  
8  
9  
10  
11  
12  
13  
14  
15  
16  
17  
18  
19  
20  
21  
22  
23  
24  
25  
26  
27  
28  
29  
30  
31  
32  
33  
34  
35  
36  
37  
38  
39  
40  
41  
42  
43  
44  
45  
46  
47  
48  
49  
50  
51  
52  
53  
54  
55  
56  
57  
58  
59  
60

| <b>Results</b>           |     |                                                                                                                                                                                                                                                                                                                                                                                                                 |                                                                                                    |
|--------------------------|-----|-----------------------------------------------------------------------------------------------------------------------------------------------------------------------------------------------------------------------------------------------------------------------------------------------------------------------------------------------------------------------------------------------------------------|----------------------------------------------------------------------------------------------------|
| Participants             | 13  | (a) Report numbers of individuals at each stage of study – e.g. numbers potentially eligible, examined for eligibility, confirmed eligible, included in the study, completing follow-up, and analyzed<br>(b) Give reasons for non-participation at each stage<br>(c) Consider use of a flow diagram                                                                                                             | Demographic characteristics (p.10) and Figure 1                                                    |
| Descriptive data         | 14  | (a) Give characteristics of study participants (e.g. demographic, clinical, social) and information on exposures and potential confounders<br>(b) Indicate number of participants with missing data for each variable of interest<br>(c) Summarize follow-up time (e.g., average and total amount)                                                                                                              | Demographic characteristics (p.10) and Table 1<br><i>Not applicable</i>                            |
| Outcome data             | 15* | Report numbers of outcome events or summary measures over time                                                                                                                                                                                                                                                                                                                                                  | Results (pp.12-19)                                                                                 |
| Main results             | 16  | (a) Give unadjusted estimates and, if applicable, confounder-adjusted estimates and their precision (e.g., 95% confidence interval). Make clear which confounders were adjusted for and why they were included<br>(b) Report category boundaries when continuous variables were categorized<br>(c) If relevant, consider translating estimates of relative risk into absolute risk for a meaningful time period | Results (pp.12-19), Tables 2-4, Supplements<br>Statistical analysis (p.8)<br><i>Not applicable</i> |
| Other analyses           | 17  | Report other analyses done – e.g. analyses of subgroups and interactions, and sensitivity analyses                                                                                                                                                                                                                                                                                                              | Results (p.20), Supplements                                                                        |
| <b>Discussion</b>        |     |                                                                                                                                                                                                                                                                                                                                                                                                                 |                                                                                                    |
| Key results              | 18  | Summarize key results with reference to study objectives                                                                                                                                                                                                                                                                                                                                                        | Discussion (pp.21-22)                                                                              |
| Limitations              | 19  | Discuss limitations of the study, taking into account sources of potential bias or imprecision. Discuss both direction and magnitude of any potential bias                                                                                                                                                                                                                                                      | Strengths and limitations (pp.23-25)                                                               |
| Interpretation           | 20  | Give a cautious overall interpretation of results considering objectives, limitations, multiplicity of analyses, results from similar studies, and other relevant evidence                                                                                                                                                                                                                                      | Findings in context, Potential consequences and implications (pp.21-23)                            |
| Generalizability         | 21  | Discuss the generalizability (external validity) of the study results                                                                                                                                                                                                                                                                                                                                           | Strengths and limitations (pp.23-25)                                                               |
| <b>Other information</b> |     |                                                                                                                                                                                                                                                                                                                                                                                                                 |                                                                                                    |
| Funding                  | 22  | Give the source of funding and the role of the funders for the present study and, if applicable, for the original study on which the present article is based                                                                                                                                                                                                                                                   | Funding (p.26)                                                                                     |
