# Supplementary material for: Association between use of systemic and inhaled glucocorticoids and changes in brain volume and white matter microstructure: a cross-sectional study using data from the UK Biobank
Source: PubMed Central journal article supplement (PMC9438037; doi:10.1136/bmjopen-2022-062446), 2022-07-28
Supplement: bmjopen-2022-062446supp004.pdf [file bmjopen-2022-062446supp004.pdf]

**Supplements**

Supplements 1, 2 and 3 are separate files.

**Supplement 4.** Violin plots of the imaging outcomes for the main analysis. AU, arbitrary units; GC, glucocorticoids

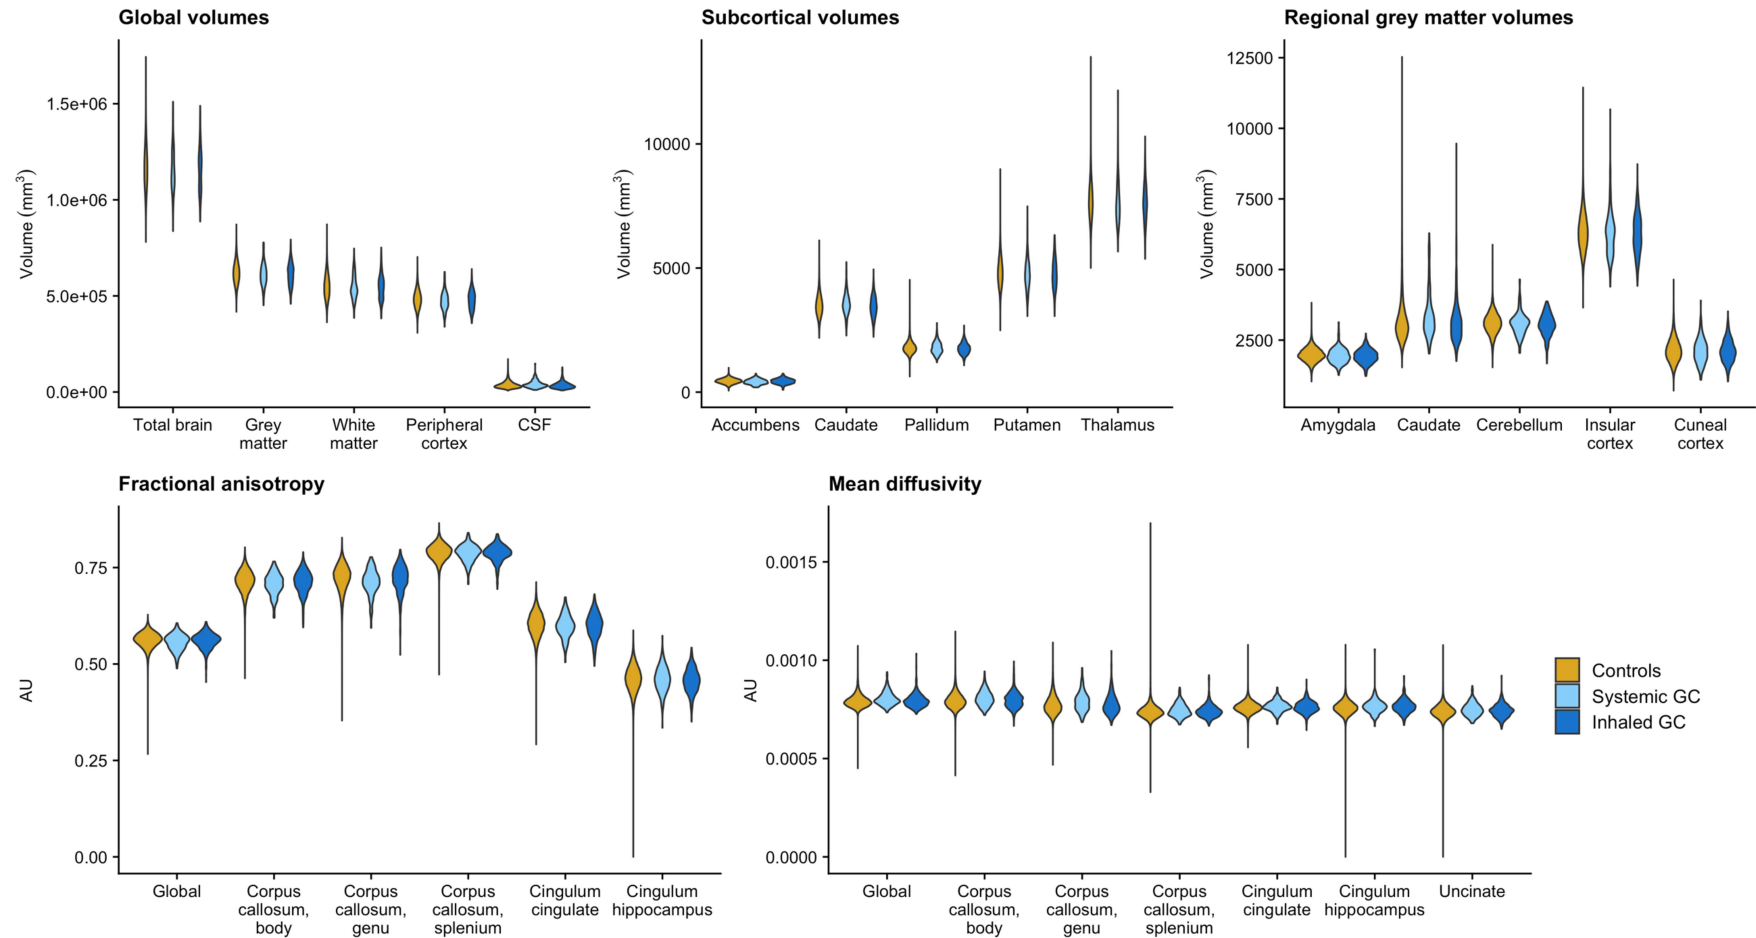

**Supplement 5.** Characteristics of included chronic glucocorticoid users and controls

|                                                    | <b>Patients using chronic systemic GC<br/>(n = 42)</b> | <b>Patients using chronic inhaled GC (n =<br/>305)</b> | <b>Controls (n = 24106)</b> | <b>P value</b> |
|----------------------------------------------------|--------------------------------------------------------|--------------------------------------------------------|-----------------------------|----------------|
| <b>Sex: male, n (%)</b>                            | 22 (52.4%)                                             | 137 (44.9%)                                            | 12154 (50.4%)               | 0.15           |
| <b>Age at time of scanning in years, mean (SD)</b> | 65.2 (7.0)                                             | 63.0 (7.6)                                             | 63.5 (7.5)                  | 0.19           |
| <b>Education level, n (%)</b>                      |                                                        |                                                        |                             | 0.81           |
| College/University degree                          | 24 (57.1)                                              | 171 (56.1)                                             | 12058 (50.0)                |                |
| A levels or equivalent                             | 6 (14.3)                                               | 38 (12.5)                                              | 2930 (12.2)                 |                |
| O levels/GCSE or equivalent                        | 4 (9.5)                                                | 44 (14.4)                                              | 4155 (17.2)                 |                |
| CSEs or equivalent                                 | 1 (2.4)                                                | 9 (3.0)                                                | 879 (3.6)                   |                |
| NVQ, HND, HNC, or equivalent                       | 1 (2.4)                                                | 14 (4.6)                                               | 1396 (5.8)                  |                |
| Other professional qualifications                  | 2 (4.8)                                                | 14 (4.6)                                               | 1150 (4.8)                  |                |
| None of the above                                  | 1 (2.4)                                                | 14 (4.6)                                               | 1311 (5.4)                  |                |
| Missing                                            | 3 (7.1)                                                | 1 (0.3)                                                | 227 (0.9)                   |                |
| <b>BMI in kg/m<sup>2</sup>, mean (SD)</b>          | 25.9 (3.7)                                             | 26.6 (4.4)                                             | 26.1 (4.1)                  | 0.15           |
| Number (%) missing                                 | 1 (2.4)                                                | 14 (4.6)                                               | 1325 (5.5)                  |                |
| <b>Body fat percentage, mean (SD)</b>              | 30.0 (6.4)                                             | 32.0 (8.1)                                             | 30.2 (7.9)                  | 4.6e-4         |
| Number (%) missing                                 | 1 (2.4)                                                | 14 (4.6)                                               | 1331 (5.5)                  |                |
| <b>Smoking status, n (%)</b>                       |                                                        |                                                        |                             | 0.42           |
| Current                                            | 1 (2.4)                                                | 6 (2.0)                                                | 647 (2.7)                   |                |
| Previous                                           | 8 (19.0)                                               | 112 (36.7)                                             | 7858 (32.6)                 |                |
| Never                                              | 31 (73.8)                                              | 206 (67.5)                                             | 15380 (63.8)                |                |
| Missing                                            | 2 (4.8)                                                | 2 (0.7)                                                | 221 (0.9)                   |                |

BMI, body mass index; GC, glucocorticoids; n, number; SD, standard deviation.

P values were determined using analysis of variance (for continuous variables) and Fisher's exact test (for categorical variables, because of the low number of patients using chronic glucocorticoids).

**Supplement 6.** Imaging parameters, presented as the adjusted mean difference of patients using chronic systemic glucocorticoids (n = 42) or chronic inhaled glucocorticoids (n = 305) compared to controls (n = 24106)

|                                                         | ANOVA   |         |                  | Systemic GC vs. controls |               |         | Inhaled GC vs. controls |             |         |
|---------------------------------------------------------|---------|---------|------------------|--------------------------|---------------|---------|-------------------------|-------------|---------|
|                                                         | F value | P value | P <sub>FDR</sub> | AMD*                     | 95% CI        | P value | AMD*                    | 95% CI      | P value |
| <b><i>Volumetric measures</i></b>                       |         |         |                  |                          |               |         |                         |             |         |
| <i>Global volumes (in mm<sup>3</sup>)</i>               |         |         |                  |                          |               |         |                         |             |         |
| Total brain volume                                      | 17.0    | 4.1e-8  | <b>1.5e-6</b>    | -2535                    | -18869; 13798 | 0.90    | 3553                    | -2340; 9445 | 0.31    |
| Grey matter volume                                      | 12.2    | 5.0e-6  | <b>9.1e-5</b>    | -1552                    | -10808; 7703  | 0.89    | 1636                    | -1703; 4975 | 0.45    |
| White matter volume                                     | 10.8    | 2.0e-5  | <b>1.8e-4</b>    | -984                     | -11702; 9735  | 0.96    | 1917                    | -1950; 5784 | 0.44    |
| Peripheral cortex                                       | 8.5     | 2.1e-4  | <b>9.4e-4</b>    | -2152                    | -10481; 6177  | 0.78    | 940                     | -2065; 3945 | 0.70    |
| CSF volume                                              | 3.0     | 5.2e-2  | <b>7.4e-2</b>    | -2408                    | -7198; 2381   | 0.43    | 154                     | -1573; 1882 | 0.96    |
| <i>Subcortical volumes (in mm<sup>3</sup>)</i>          |         |         |                  |                          |               |         |                         |             |         |
| Amygdala                                                | 5.8     | 2.9e-3  | <b>8.2e-3</b>    | 52.1                     | -19.3; 123.5  | 0.19    | -20.6                   | -46.4; 5.2  | 0.14    |
| Caudate                                                 | 7.2     | 7.6e-4  | <b>2.9e-3</b>    | 112.7                    | -12.9; 238.2  | 0.09    | -5.0                    | -50.3; 40.3 | 0.95    |
| Hippocampus                                             | 4.9     | 7.8e-3  | <b>1.7e-2</b>    | 59.2                     | -79.1; 197.5  | 0.54    | -38.4                   | -88.3; 11.5 | 0.16    |
| Pallidum                                                | 7.1     | 7.9e-4  | <b>2.9e-3</b>    | 4.01                     | -68.2; 76.2   | 0.98    | -23.0                   | -49.0; 3.1  | 0.094   |
| Putamen                                                 | 5.0     | 6.9e-3  | <b>1.6e-2</b>    | -65.4                    | -222.8; 92.0  | 0.55    | -26.1                   | -82.9; 30.7 | 0.49    |
| Thalamus                                                | 6.7     | 1.3e-3  | <b>4.1e-3</b>    | 61.9                     | -120.7; 244.5 | 0.66    | -11.6                   | -77.5; 54.3 | 0.88    |
| <i>Regional grey matter volumes (in mm<sup>3</sup>)</i> |         |         |                  |                          |               |         |                         |             |         |
| Amygdala                                                | 10.1    | 4.2e-5  | <b>3.0e-4</b>    | 4.8                      | -60.8; 70.3   | 0.97    | -15.1                   | -38.8; 8.5  | 0.27    |
| Cerebellum                                              | 4.1     | 1.6e-2  | <b>2.9e-2</b>    | 25.7                     | -76.5; 127.9  | 0.79    | 4.4                     | -32.4; 41.3 | 0.94    |
| Cingulate gyrus, posterior                              | 4.2     | 1.6e-2  | <b>2.9e-2</b>    | 36.0                     | -158.8; 230.7 | 0.87    | 25.5                    | -44.8; 95.8 | 0.63    |

|                              |      |        |               |         |                 |               |         |                  |               |
|------------------------------|------|--------|---------------|---------|-----------------|---------------|---------|------------------|---------------|
| Hippocampus                  | 9.1  | 1.1e-4 | <b>6.6e-4</b> | 63.5    | -52.4; 179.5    | 0.37          | -24.3   | -66.1; 17.6      | 0.34          |
| Precuneal cortex             | 8.6  | 1.8e-4 | <b>9.1e-4</b> | 170.0   | -201.0; 541.2   | 0.49          | -59.9   | -194.0; 74.1     | 0.51          |
| <b>DTI measures</b>          |      |        |               |         |                 |               |         |                  |               |
| <i>Fractional anisotropy</i> |      |        |               |         |                 |               |         |                  |               |
| Global                       | 5.4  | 4.4e-3 | <b>1.1e-2</b> | -0.0066 | -0.013; -3.2e-4 | <b>0.038</b>  | -0.0025 | -0.0048; -2.3e-4 | <b>0.027</b>  |
| Genu of corpus callosum      | 5.8  | 3.2e-3 | <b>8.2e-3</b> | -0.014  | -0.025; -0.0031 | <b>0.0087</b> | -0.0020 | -0.0060; 0.0020  | 0.44          |
| Cingulum hippocampus         | 3.7  | 2.4e-2 | <b>3.9e-2</b> | 0.0032  | -0.0078; 0.014  | 0.73          | -0.0034 | -0.0074; 6.4e-4  | 0.11          |
| <i>Mean diffusivity</i>      |      |        |               |         |                 |               |         |                  |               |
| Global                       | 4.7  | 9.5e-3 | <b>1.9e-2</b> | 9.4e-6  | 8.7e-8; 1.9e-5  | <b>0.05</b>   | 2.6e-6  | -7.7e-7; 6.0e-6  | 0.16          |
| Genu of corpus callosum      | 6.3  | 1.8e-3 | <b>5.3e-3</b> | 2.0e-5  | 5.5e-6; 3.5e-5  | <b>0.0043</b> | 2.8e-6  | -2.5e-6; 8.0e-6  | 0.40          |
| Splenium of corpus callosum  | 3.9  | 2.0e-2 | <b>3.5e-2</b> | 8.1e-6  | -2.4e-6; 1.9e-5 | 0.16          | 5.2e-6  | 1.4e-6; 9.0e-6   | <b>0.0044</b> |
| Cingulum hippocampus         | 11.6 | 9.0e-6 | <b>1.1e-4</b> | 8.2e-6  | -2.4e-6; 1.9e-5 | 0.16          | 6.3e-6  | 2.5e-6; 1.0e-5   | <b>5.0e-4</b> |

\* Adjusted mean difference, calculated using linear models, adjusted for age, sex, education, X-, Y-, and Z-position of the head in the scanner, head size, assessment centre, and year of imaging acquisition.

CI, confidence interval;  $P_{FDR}$ , Benjamini-Hochberg false discovery rate corrected P values; SE, standard error. P values in bold are statistically significant ( $P < 0.05$ ).

**Supplement 7.** Cognitive outcome measures of chronic systemic glucocorticoid users (n = 42) and chronic inhaled glucocorticoid users (n = 305) vs. controls

|                            | ANOVA   |         |                  | Systemic GC vs. controls |             | Inhaled GC vs. controls |       |             | Participants with available data, n (%) |             |            |            |
|----------------------------|---------|---------|------------------|--------------------------|-------------|-------------------------|-------|-------------|-----------------------------------------|-------------|------------|------------|
|                            | F value | P value | P <sub>FDR</sub> | AMD*                     | 95% CI      | P value                 | AMD*  | 95% CI      | P value                                 | Systemic GC | Inhaled GC | Controls   |
| <b>Trail making A</b>      | 0.41    | 0.66    | 0.84             | 0.12                     | -0.26; 0.51 | 0.69                    | -0.07 | -0.24; 0.10 | 0.55                                    | 30 (71)     | 151 (50)   | 16419 (68) |
| <b>Trail making B</b>      | 0.28    | 0.75    | 0.84             | -0.08                    | -0.47; 0.31 | 0.84                    | 0.00  | -0.17; 0.17 | 1.00                                    | 28 (67)     | 148 (49)   | 16071 (67) |
| <b>Symbol substitution</b> | 0.35    | 0.70    | 0.84             | -0.08                    | -0.45; 0.30 | 0.84                    | -0.05 | -0.21; 0.11 | 0.71                                    | 30 (71)     | 151 (50)   | 16442 (68) |

\* Adjusted mean difference between patients and controls, expressed in Z scores. Calculated using linear models, adjusting for age, sex, and education.

Trail making A, and trail making B were log transformed before generation of Z scores because they were non-normally distributed. Variables were transformed such that higher values indicate a better performance.

CI, confidence interval; GC, glucocorticoids; n, number; P<sub>FDR</sub>, Benjamini-Hochberg false discovery rate corrected P values

**Supplement 8.** Self-reported frequency of mental health parameters in the past two weeks of patients using systemic glucocorticoids (n = 222) or inhaled glucocorticoids (n = 557) and controls, presented as number of participants (%) per category

|                               | <b>Systemic GC<br/>(n=222)</b> | <b>Inhaled GC<br/>(n=557)</b> | <b>Controls<br/>(n=24106)</b> |
|-------------------------------|--------------------------------|-------------------------------|-------------------------------|
| <b>Depressed mood</b>         |                                |                               |                               |
| Not at all                    | 170 (77)                       | 455 (82)                      | 19940 (83)                    |
| Several days                  | 39 (18)                        | 77 (14)                       | 3017 (13)                     |
| More than half of the days    | 6 (2.7)                        | 8 (1.4)                       | 296 (1.2)                     |
| Nearly every day              | 1 (0.5)                        | 3 (0.5)                       | 150 (0.6)                     |
| Missing                       | 6 (2.7)                        | 14 (2.5)                      | 703 (2.9)                     |
| <b>Disinterest</b>            |                                |                               |                               |
| Not at all                    | 174 (78)                       | 468 (84)                      | 20536 (85)                    |
| Several days                  | 34 (15)                        | 61 (11)                       | 2568 (11)                     |
| More than half of the days    | 3 (1.3)                        | 7 (1.3)                       | 292 (1.2)                     |
| Nearly every day              | 5 (2.3)                        | 5 (0.9)                       | 174 (0.7)                     |
| Missing                       | 6 (2.7)                        | 16 (2.9)                      | 536 (2.2)                     |
| <b>Tenseness/restlessness</b> |                                |                               |                               |
| Not at all                    | 162 (73)                       | 437 (78)                      | 19412 (81)                    |
| Several days                  | 46 (21)                        | 89 (16)                       | 3630 (15)                     |
| More than half of the days    | 3 (1.3)                        | 12 (2.2)                      | 272 (1.1)                     |
| Nearly every day              | 5 (2.3)                        | 5 (0.9)                       | 126 (0.5)                     |
| Missing                       | 6 (2.7)                        | 14 (2.5)                      | 666 (2.8)                     |
| <b>Tiredness/lethargy</b>     |                                |                               |                               |
| Not at all                    | 95 (43)                        | 280 (50)                      | 13792 (57)                    |
| Several days                  | 91 (41)                        | 221 (40)                      | 8345 (35)                     |
| More than half of the days    | 9 (4.1)                        | 32 (5.7)                      | 815 (3.4)                     |
| Nearly every day              | 19 (8.6)                       | 15 (2.7)                      | 555 (2.3)                     |
| Missing                       | 8 (3.6)                        | 9 (1.6)                       | 599 (2.5)                     |

GC, glucocorticoids; n, number.



**Supplement 9.** Self-reported frequency of mental health parameters in the past two weeks of chronic systemic glucocorticoid users (n = 42), chronic inhaled glucocorticoid users (n = 305) and controls, presented as number of participants (%) per category

|                               | <b>Systemic GC<br/>(n = 42)</b> | <b>Inhaled GC<br/>(n = 305)</b> | <b>Controls<br/>(n = 24106)</b> |
|-------------------------------|---------------------------------|---------------------------------|---------------------------------|
| <b>Depressed mood</b>         |                                 |                                 |                                 |
| Not at all                    | 33 (79)                         | 257 (84)                        | 19940 (83)                      |
| Several days                  | 6 (14)                          | 35 (11)                         | 3017 (13)                       |
| More than half of the days    | 0 (0)                           | 3 (0.9)                         | 296 (1.2)                       |
| Nearly every day              | 0 (0)                           | 1 (0.3)                         | 150 (0.6)                       |
| Missing                       | 3 (7.1)                         | 9 (3.0)                         | 703 (2.9)                       |
| <b>Disinterest</b>            |                                 |                                 |                                 |
| Not at all                    | 34 (81)                         | 267 (88)                        | 20536 (85)                      |
| Several days                  | 6 (14)                          | 30 (9.8)                        | 2568 (11)                       |
| More than half of the days    | 0 (0)                           | 1 (0.3)                         | 292 (1.2)                       |
| Nearly every day              | 0 (0)                           | 0 (0)                           | 174 (0.7)                       |
| Missing                       | 2 (4.8)                         | 7 (2.3)                         | 536 (2.2)                       |
| <b>Tenseness/restlessness</b> |                                 |                                 |                                 |
| Not at all                    | 30 (71)                         | 245 (80)                        | 19412 (81)                      |
| Several days                  | 10 (24)                         | 48 (16)                         | 3630 (15)                       |
| More than half of the days    | 0 (0)                           | 6 (2.0)                         | 272 (1.1)                       |
| Nearly every day              | 0 (0)                           | 1 (0.3)                         | 126 (0.5)                       |
| Missing                       | 2 (4.8)                         | 5 (1.6)                         | 666 (2.8)                       |
| <b>Tiredness/lethargy</b>     |                                 |                                 |                                 |
| Not at all                    | 24 (57)                         | 156 (51)                        | 13792 (57)                      |
| Several days                  | 12 (29)                         | 121 (40)                        | 8345 (35)                       |
| More than half of the days    | 2 (4.8)                         | 14 (4.6)                        | 815 (3.4)                       |
| Nearly every day              | 2 (4.8)                         | 8 (2.6)                         | 555 (2.3)                       |
| Missing                       | 2 (4.8)                         | 6 (2.0)                         | 599 (2.5)                       |

GC, glucocorticoids; n, number.

**Supplement 10.** Likelihood of experiencing mental health complaints in the past two weeks of chronic systemic glucocorticoid users (n = 42) and chronic inhaled glucocorticoid users (n = 305) compared to controls

|                    | Likelihood ratio test |         |                  | Systemic GC vs. controls |            |         | Inhaled GC vs. controls |            |               |
|--------------------|-----------------------|---------|------------------|--------------------------|------------|---------|-------------------------|------------|---------------|
|                    | $\chi^2$              | P value | P <sub>FDR</sub> | OR                       | 95% CI     | P value | OR                      | 95% CI     | P value       |
| <b>Depression</b>  | 1.1                   | 0.57    | 0.57             | 1.21                     | 0.45; 2.73 | 0.67    | 0.85                    | 0.59; 1.18 | 0.34          |
| <b>Disinterest</b> | 2.2                   | 0.33    | 0.44             | 1.41                     | 0.53; 3.17 | 0.44    | 0.79                    | 0.53; 1.13 | 0.21          |
| <b>Tenseness</b>   | 2.5                   | 0.28    | 0.44             | 1.84                     | 0.84; 3.68 | 0.10    | 1.05                    | 0.78; 1.40 | 0.73          |
| <b>Tiredness</b>   | 4.4                   | 0.11    | 0.44             | 0.96                     | 0.49; 1.84 | 0.91    | 1.28                    | 1.01; 1.61 | <b>0.0037</b> |

Calculated using logistic regression analysis, adjusting for age, sex, and education. P values in bold are statistically significant after Bonferroni correction for family-wise error rate of two tests (P < 0.025).

CI, confidence interval; GC, glucocorticoids; OR, odds ratio; P<sub>FDR</sub>, Benjamini-Hochberg false discovery rate corrected P values.

**Supplement 11.** Sensitivity analysis: Characteristics of included glucocorticoid users and controls (without exclusion of participants based on psychiatric, neurological, or endocrine history or medication use)

|                                                    | Patients using systemic GC (n = 312) | Patients using inhaled GC (n = 806) | Controls (n = 36310) | P value |
|----------------------------------------------------|--------------------------------------|-------------------------------------|----------------------|---------|
| <b>Sex: male, n (%)</b>                            | 145 (46.5)                           | 344 (42.7)                          | 17041 (46.9)         | 0.057   |
| <b>Age at time of scanning in years, mean (SD)</b> | 66.1 (6.9)                           | 62.8 (7.5)                          | 63.7 (7.5)           | 3.6e-10 |
| <b>Education level, n (%)</b>                      |                                      |                                     |                      | 0.37    |
| College/University degree                          | 143 (45.8)                           | 407 (50.5)                          | 17637 (48.6)         |         |
| A levels or equivalent                             | 39 (12.5)                            | 98 (12.2)                           | 4392 (12.1)          |         |
| O levels/GCSE or equivalent                        | 53 (17.0)                            | 136 (16.9)                          | 6400 (17.6)          |         |
| CSEs or equivalent                                 | 13 (4.2)                             | 26 (3.2)                            | 1372 (3.8)           |         |
| NVQ, HND, HNC, or equivalent                       | 11 (3.5)                             | 50 (6.2)                            | 2142 (5.9)           |         |
| Other professional qualifications                  | 21 (6.7)                             | 45 (5.6)                            | 1795 (4.9)           |         |
| None of the above                                  | 27 (8.7)                             | 40 (5.0)                            | 2208 (6.1)           |         |
| Missing                                            | 5 (1.6)                              | 4 (0.5)                             | 364 (1.0)            |         |
| <b>BMI in kg/m<sup>2</sup>, mean (SD)</b>          | 26.7 (4.4)                           | 27.1 (4.7)                          | 26.5 (4.4)           | 2.2e-4  |
| Number (%) missing                                 | 11 (3.5)                             | 31 (3.8)                            | 1932 (5.3)           |         |
| <b>Body fat percentage, mean (SD)</b>              | 31.9 (8.2)                           | 32.6 (8.4)                          | 31.1 (8.1)           | 5.5e-7  |
| Number (%) missing                                 | 11 (3.5)                             | 31 (3.8)                            | 1942 (5.3)           |         |
| <b>Smoking status, n (%)</b>                       |                                      |                                     |                      | 0.096   |
| Current                                            | 10 (3.2)                             | 25 (3.1)                            | 1231 (3.3)           |         |
| Previous                                           | 118 (37.8)                           | 299 (37.1)                          | 12063 (33.2)         |         |
| Never                                              | 181 (58.0)                           | 477 (59.2)                          | 22661 (62.4)         |         |
| Missing                                            | 3 (1.0)                              | 5 (0.6)                             | 355 (1.0)            |         |

BMI, body mass index; GC, glucocorticoids; n, number; SD, standard deviation.

P values determined using analysis of variance (for continuous variables) and Pearson's Chi squared test (for categorical variables).

**Supplement 12.** Sensitivity analysis: Imaging parameters, presented as the adjusted mean difference of patients using systemic glucocorticoids (n = 312) or inhaled glucocorticoids (n = 806) compared to controls (n = 36310) (without exclusion of participants based on psychiatric, neurological, or endocrine history or medication use)

|                                                         | ANOVA   |         |                  | Systemic GC vs. controls |             |               | Inhaled GC vs. controls |             |               |
|---------------------------------------------------------|---------|---------|------------------|--------------------------|-------------|---------------|-------------------------|-------------|---------------|
|                                                         | F value | P value | P <sub>FDR</sub> | AMD*                     | 95% CI      | P value       | AMD*                    | 95% CI      | P value       |
| <b><i>Volumetric measures</i></b>                       |         |         |                  |                          |             |               |                         |             |               |
| <i>Global volumes (in mm<sup>3</sup>)</i>               |         |         |                  |                          |             |               |                         |             |               |
| Total brain volume                                      | 17.7    | 2.2e-8  | <b>1.3e-7</b>    | -3460                    | -9320; 2400 | 0.32          | 3535                    | -121; 7190  | 0.060         |
| Grey matter volume                                      | 22.3    | 2.0e-10 | <b>2.4e-9</b>    | -2224                    | -5577; 1130 | 0.25          | 1454                    | -637; 3546  | 0.22          |
| White matter volume                                     | 5.5     | 4.1e-3  | <b>6.7e-3</b>    | -1237                    | -5078; 2604 | 0.69          | 2080                    | -316; 4476  | 0.10          |
| Peripheral cortex                                       | 24.6    | 2.0e-11 | <b>4.4e-10</b>   | -3318                    | -6330; -307 | <b>0.028</b>  | 1172                    | -706; 3051  | 0.29          |
| CSF volume                                              | 14.2    | 7.1e-7  | <b>2.3e-6</b>    | 1220                     | -518; 2958  | 0.12          | 223                     | -861; 1307  | 0.65          |
| <i>Subcortical volumes (in mm<sup>3</sup>)</i>          |         |         |                  |                          |             |               |                         |             |               |
| Accumbens                                               | 10.2    | 3.8e-5  | <b>1.0e-4</b>    | -8.9                     | -20.4; 2.7  | 0.16          | -3.7                    | -10.9; 3.5  | 0.41          |
| Caudate                                                 | 4.5     | 1.1e-2  | <b>1.7e-2</b>    | 58.6                     | 13.8; 103.5 | <b>0.0072</b> | -5.9                    | -33.9; 22.1 | 0.84          |
| Pallidum                                                | 6.9     | 1.0e-3  | <b>1.9e-3</b>    | 1.2                      | -24.5; 27.0 | 0.99          | -16.2                   | -32.3; -0.2 | <b>0.047</b>  |
| Putamen                                                 | 9.8     | 5.6e-5  | <b>1.5e-4</b>    | -33.8                    | -90.5; 22.9 | 0.32          | -20.1                   | -55.5; 15.3 | 0.35          |
| Thalamus                                                | 9.3     | 9.4e-5  | <b>2.3e-4</b>    | -19.9                    | -86.2; 46.5 | 0.72          | -10.7                   | -52.1; 30.7 | 0.78          |
| <i>Regional grey matter volumes (in mm<sup>3</sup>)</i> |         |         |                  |                          |             |               |                         |             |               |
| Amygdala                                                | 21.0    | 7.8e-10 | <b>7.0e-9</b>    | -6.7                     | -30.4; 17.1 | 0.75          | -21.7                   | -36.5; -6.8 | <b>0.0023</b> |
| Caudate                                                 | 12.3    | 4.7e-6  | <b>1.4e-5</b>    | 149.6                    | 66.9; 232.4 | <b>1.0e-4</b> | 42.9                    | -8.7; 94.5  | 0.12          |
| Cerebellum                                              | 5.8     | 3.1e-3  | <b>5.2e-3</b>    | 17.8                     | -19.4; 54.9 | 0.47          | -2.9                    | -26.1; 20.3 | 0.93          |

|                              |      |         |                |         |                  |               |         |                  |               |
|------------------------------|------|---------|----------------|---------|------------------|---------------|---------|------------------|---------------|
| Insular cortex               | 8.7  | 1.7e-4  | <b>3.5e-4</b>  | -42.1   | -103.5; 19.4     | 0.23          | 8.0     | -30.3; 46.3      | 0.84          |
| Precuneal cortex             | 4.0  | 1.9e-2  | <b>2.7e-2</b>  | -9.7    | -142.8; 123.4    | 0.97          | -1.7    | -84.7; 81.3      | 1.00          |
| <b>DTI measures</b>          |      |         |                |         |                  |               |         |                  |               |
| <i>Fractional anisotropy</i> |      |         |                |         |                  |               |         |                  |               |
| Global                       | 15.5 | 1.8e-7  | <b>9.4e-7</b>  | -0.0031 | -0.0055; -7.5e-4 | <b>0.0066</b> | -0.0015 | -0.0030; -4.9e-5 | <b>0.041</b>  |
| Body of corpus callosum      | 8.9  | 1.4e-4  | <b>3.1e-4</b>  | -0.0039 | -0.0076; -0.0003 | <b>0.032</b>  | -0.0014 | -0.0036; 8.9e-4  | 0.30          |
| Genu of corpus callosum      | 15.2 | 2.5e-7  | <b>1.1e-6</b>  | -0.0056 | -0.0097; -0.0014 | <b>0.0055</b> | -0.0013 | -0.0039; 0.0013  | 0.44          |
| Cingulum cingulate           | 3.8  | 2.3e-2  | <b>3.1e-2</b>  | -0.0014 | -0.0052; 0.0025  | 0.64          | -0.0018 | -0.0042; 5.9e-4  | 0.17          |
| <i>Mean diffusivity</i>      |      |         |                |         |                  |               |         |                  |               |
| Global                       | 24.5 | 2.4e-11 | <b>4.4e-10</b> | 6.6e-6  | 3.0e-6; 1.0e-5   | <b>3.7e-5</b> | 1.9e-6  | -3.2e-7; 4.1e-6  | 5.7e-2        |
| Body of corpus callosum      | 14.2 | 6.7e-7  | <b>2.3e-6</b>  | 6.7e-6  | 1.9e-6; 1.1e-5   | <b>0.0034</b> | 4.0e-6  | 1.1e-6; 7.0e-6   | <b>0.0048</b> |
| Genu of corpus callosum      | 17.9 | 1.7e-8  | <b>1.2e-7</b>  | 8.0e-6  | 2.5e-6; 1.4e-5   | <b>0.0023</b> | 3.3e-6  | -1.4e-7; 6.7e-6  | 0.0622        |
| Splenium of corpus callosum  | 6.7  | 1.2e-3  | <b>2.2e-3</b>  | 3.7e-6  | -3.1e-7; 7.6e-6  | 0.076         | 4.0e-6  | 1.5e-6; 6.4e-6   | <b>7.0e-4</b> |
| Cingulum cingulate           | 4.9  | 7.6e-3  | <b>1.2e-2</b>  | 2.5e-6  | -6.8e-7; 5.7e-6  | 0.15          | 2.2e-6  | 2.2e-7; 4.2e-6   | <b>0.026</b>  |
| Cingulum hippocampus         | 14.5 | 4.9e-7  | <b>2.0e-6</b>  | 2.6e-6  | -1.3e-6; 6.6e-6  | 0.25          | 4.5e-6  | 2.0e-6; 7.0e-6   | <b>1.0e-4</b> |
| Uncinate fasciculus          | 7.3  | 6.6e-4  | <b>1.3e-3</b>  | 4.0e-6  | 2.9e-7; 7.7e-6   | <b>0.032</b>  | 1.6e-6  | -7.5e-7; 3.9e-6  | 0.23          |

\* Adjusted mean difference, calculated using linear models, adjusted for age, sex, education, X-, Y-, and Z-position of the head in the scanner, head size, assessment centre, and year of imaging acquisition.

P<sub>FDR</sub>, Benjamini-Hochberg false discovery rate corrected P values; SE, standard error. P values in bold are statistically significant (P < 0.05).

**Supplement 13.** Sensitivity analysis: Cognitive outcome measures of systemic glucocorticoid users (n = 312) and inhaled glucocorticoid users (n = 806) vs. controls (n = 36310) (without exclusion of participants based on psychiatric, neurological, or endocrine history or medication use)

|                            | ANOVA   |         |                  | Systemic GC vs. controls |              | Inhaled GC vs. controls |        |             | Participants with available data, n (%) |             |            |            |
|----------------------------|---------|---------|------------------|--------------------------|--------------|-------------------------|--------|-------------|-----------------------------------------|-------------|------------|------------|
|                            | F value | P value | P <sub>FDR</sub> | AMD*                     | 95% CI       | P value                 | AMD*   | 95% CI      | P value                                 | Systemic GC | Inhaled GC | Controls   |
| <b>Trail making A</b>      | 6.6     | 0.0014  | <b>0.0028</b>    | -0.11                    | -0.26; 0.03  | 0.16                    | 0.020  | -0.08; 0.12 | 0.86                                    | 206 (66)    | 422 (52)   | 24297 (67) |
| <b>Trail making B</b>      | 6.7     | 0.0013  | <b>0.0028</b>    | -0.12                    | -0.27; 0.02  | 0.10                    | -0.018 | -0.12; 0.08 | 0.88                                    | 194 (62)    | 415 (51)   | 23273 (64) |
| <b>Symbol substitution</b> | 9.7     | 6.2e-5  | <b>0.00037</b>   | -0.15                    | -0.29; -0.01 | <b>0.029</b>            | -0.061 | -0.16; 0.04 | 0.28                                    | 203 (65)    | 423 (52)   | 24337 (67) |

\* Adjusted mean difference between patients and controls, expressed in Z scores. Calculated using linear models, adjusted for age, sex, and education. Trail making A, and trail making B were log transformed before generation of Z scores because they were non-normally distributed. Variables were transformed such that higher values indicate a better performance.

GC, glucocorticoids; P<sub>FDR</sub>, Benjamini-Hochberg false discovery rate corrected P values.

**Supplement 14.** Sensitivity analysis: Self-reported frequency of mental health parameters in the past two weeks of patients using systemic glucocorticoids (n = 312) or inhaled glucocorticoids (n = 806) and controls, presented as number of participants (%) per category (without exclusion of participants based on psychiatric, neurological, or endocrine history or medication use)

|                               | <b>Systemic GC<br/>(n = 312)</b> | <b>Inhaled GC<br/>(n = 806)</b> | <b>Controls<br/>(n = 36310)</b> |
|-------------------------------|----------------------------------|---------------------------------|---------------------------------|
| <b>Depressed mood</b>         |                                  |                                 |                                 |
| Not at all                    | 240 (76.9)                       | 620 (76.9)                      | 29014 (80.0)                    |
| Several days                  | 55 (17.6)                        | 139 (17.2)                      | 5197 (14.3)                     |
| More than half of the days    | 8 (2.6)                          | 14 (1.7)                        | 593 (1.6)                       |
| Nearly every day              | 2 (0.6)                          | 14 (1.7)                        | 360 (1.0)                       |
| Missing                       | 7 (2.2)                          | 19 (2.4)                        | 1146 (3.2)                      |
| <b>Disinterest</b>            |                                  |                                 |                                 |
| Not at all                    | 237 (76.0)                       | 639 (79.3)                      | 29916 (82.4)                    |
| Several days                  | 55 (17.6)                        | 118 (14.6)                      | 4583 (12.6)                     |
| More than half of the days    | 8 (2.6)                          | 17 (2.1)                        | 604 (1.7)                       |
| Nearly every day              | 5 (1.6)                          | 12 (1.5)                        | 357 (1.0)                       |
| Missing                       | 7 (2.2)                          | 20 (2.5)                        | 850 (2.3)                       |
| <b>Tenseness/restlessness</b> |                                  |                                 |                                 |
| Not at all                    | 221 (70.8)                       | 588 (73.0)                      | 28266 (77.8)                    |
| Several days                  | 71 (22.8)                        | 157 (19.5)                      | 6113 (16.8)                     |
| More than half of the days    | 6 (1.9)                          | 23 (2.9)                        | 565 (1.6)                       |
| Nearly every day              | 6 (1.9)                          | 16 (2.0)                        | 313 (0.9)                       |
| Missing                       | 8 (2.6)                          | 22 (2.7)                        | 1053 (2.9)                      |
| <b>Tiredness/lethargy</b>     |                                  |                                 |                                 |
| Not at all                    | 125 (40.0)                       | 366 (45.4)                      | 19107 (52.6)                    |
| Several days                  | 130 (41.7)                       | 321 (39.8)                      | 13373 (36.8)                    |
| More than half of the days    | 22 (7.1)                         | 53 (6.6)                        | 1533 (4.2)                      |
| Nearly every day              | 26 (8.3)                         | 51 (6.3)                        | 1358 (3.7)                      |
| Missing                       | 9 (2.9)                          | 15 (1.9)                        | 939 (2.6)                       |

GC, glucocorticoids; n, number.



**Supplement 15.** Sensitivity analysis: Likelihood of experiencing mental health complaints in the past two weeks of systemic glucocorticoid users (n = 312) and inhaled glucocorticoid users (n = 806) compared to controls (without exclusion of participants based on psychiatric, neurological, or endocrine history or medication use)

|                    | Likelihood ratio test |         |                  | Systemic GC vs. controls |            | Inhaled GC vs. controls |      |            |               |
|--------------------|-----------------------|---------|------------------|--------------------------|------------|-------------------------|------|------------|---------------|
|                    | X <sup>2</sup>        | P value | P <sub>FDR</sub> | OR                       | 95% CI     | P value                 | OR   | 95% CI     | P value       |
| <b>Depression</b>  | 11.1                  | 0.0039  | 0.0039           | 1.44                     | 1.08; 1.89 | <b>0.010</b>            | 1.23 | 1.03; 1.46 | <b>0.023</b>  |
| <b>Disinterest</b> | 17.8                  | 1.4e-4  | 1.9e-04          | 1.73                     | 1.31; 2.27 | <b>8.5e-05</b>          | 1.21 | 1.00; 1.45 | 0.041         |
| <b>Tenseness</b>   | 24.0                  | 6.1e-06 | 1.2e-05          | 1.68                     | 1.29; 2.16 | <b>7.0e-05</b>          | 1.31 | 1.11; 1.54 | <b>0.0014</b> |
| <b>Tiredness</b>   | 39.2                  | 3.1e-09 | 1.2e-08          | 1.79                     | 1.42; 2.27 | <b>9.0e-07</b>          | 1.33 | 1.15; 1.53 | <b>1.1e-4</b> |

Calculated using logistic regression analysis, adjusting for age, sex, and education. P values in bold are statistically significant after Bonferroni correction for family-wise error rate of two tests (P < 0.025).

CI, confidence interval; GC, glucocorticoids; OR, odds ratio; P<sub>FDR</sub>, Benjamini-Hochberg false discovery rate corrected P values.

**Supplement 16.** Sensitivity analysis: Imaging parameters, presented as the adjusted mean difference of patients using systemic glucocorticoids (n = 222) or inhaled glucocorticoids (n = 557) compared to controls (n = 24106) (after exclusion of outlier values per group per variable)

|                                                         | ANOVA   |         |                  | Systemic GC vs. controls |              | Inhaled GC vs. controls |       |             |             |
|---------------------------------------------------------|---------|---------|------------------|--------------------------|--------------|-------------------------|-------|-------------|-------------|
|                                                         | F value | P value | P <sub>FDR</sub> | AMD*                     | 95% CI       | P value                 | AMD*  | 95% CI      | P value     |
| <b>Volumetric measures</b>                              |         |         |                  |                          |              |                         |       |             |             |
| <i>Global volumes (in mm<sup>3</sup>)</i>               |         |         |                  |                          |              |                         |       |             |             |
| Total brain volume                                      | 16.0    | 1.1e-7  | <b>4.6e-7</b>    | -3991                    | -10852; 2869 | 0.33                    | 3756  | -565; 8076  | 0.10        |
| Grey matter volume                                      | 28.8    | 3.4e-13 | <b>6.1e-12</b>   | -3143                    | -7081; 794   | 0.14                    | 1120  | -1337; 3576 | 0.50        |
| White matter volume                                     | 5.4     | 4.6e-3  | <b>7.1e-3</b>    | -1861                    | -6349; 2626  | 0.55                    | 2374  | -454; 5203  | 0.11        |
| Peripheral cortex                                       | 27.0    | 2.0e-12 | <b>1.8e-11</b>   | -4412                    | -7948; -876  | <b>0.011</b>            | 1148  | -1058; 3355 | 0.41        |
| CSF volume                                              | 16.8    | 5.0e-8  | <b>2.3e-7</b>    | 1437                     | -210; 3084   | 0.10                    | -449  | -1492; 594  | 0.53        |
| <i>Subcortical volumes (in mm<sup>3</sup>)</i>          |         |         |                  |                          |              |                         |       |             |             |
| Accumbens                                               | 13.0    | 2.3e-6  | <b>5.8e-6</b>    | -15.6                    | -28.8; -2.3  | <b>0.018</b>            | -4.6  | -13.0; 3.7  | 0.37        |
| Caudate                                                 | 4.7     | 8.8e-3  | <b>1.1e-2</b>    | 69.4                     | 18.4; 120.3  | <b>0.0049</b>           | 4.5   | -27.4; 36.3 | 0.92        |
| Hippocampus                                             | 5.4     | 4.7e-3  | <b>7.1e-3</b>    | -17.1                    | -71.2; 37.0  | 0.70                    | -17   | -51.3; 17.3 | 0.44        |
| Pallidum                                                | 4.9     | 7.4e-3  | <b>9.8e-3</b>    | 5.7                      | -20.5; 31.8  | 0.83                    | -9.8  | -26.3; 6.7  | 0.32        |
| Putamen                                                 | 13.7    | 1.1e-6  | <b>3.4e-6</b>    | -63                      | -127.1; 1.0  | 0.055                   | -19.9 | -59.7; 20.0 | 0.44        |
| Thalamus                                                | 10.0    | 4.6e-5  | <b>8.7e-5</b>    | -25.6                    | -98.2; 46.9  | 0.64                    | -0.6  | -46.2; 45.1 | 1.00        |
| <i>Regional grey matter volumes (in mm<sup>3</sup>)</i> |         |         |                  |                          |              |                         |       |             |             |
| Amygdala                                                | 28.3    | 5.1e-13 | <b>6.1e-12</b>   | -17.2                    | -43.8; 9.4   | 0.26                    | -22.6 | -39.3; -5.9 | <b>0.01</b> |
| Caudate                                                 | 12.6    | 3.5e-6  | <b>8.4e-6</b>    | 138.1                    | 67.7; 208.6  | <b>&lt;0.0001</b>       | 15.1  | -28.8; 59.1 | 0.66        |
| Cerebellum                                              | 10.3    | 3.3e-5  | <b>6.6e-5</b>    | -1.1                     | -42.8; 40.6  | 1.00                    | -6.6  | -32.5; 19.3 | 0.78        |

|                              |      |         |                |          |                  |                   |         |                  |               |
|------------------------------|------|---------|----------------|----------|------------------|-------------------|---------|------------------|---------------|
| Cingulate gyrus, anterior    | 3.9  | 2.1e-2  | <b>2.6e-2</b>  | 110.5    | -7.8; 229.0      | 0.071             | 27.1    | -47.9; 102.0     | 0.63          |
| Hippocampus                  | 3.3  | 3.9e-2  | <b>4.6e-2</b>  | 24.3     | -22.4; 70.9      | 0.41              | 2.4     | -27.0; 31.8      | 0.97          |
| Insular cortex               | 13.1 | 2.0e-6  | <b>5.5e-6</b>  | -74.8    | -143.2; -6.4     | <b>0.029</b>      | 8.7     | -34.1; 51.4      | 0.85          |
| Precuneal cortex             | 5.2  | 5.4e-3  | <b>7.5e-3</b>  | -60.1    | -213.6; 93.3     | 0.59              | 0.0     | -95.6; 95.6      | 1.00          |
| <b>DTI measures</b>          |      |         |                |          |                  |                   |         |                  |               |
| <i>Fractional anisotropy</i> |      |         |                |          |                  |                   |         |                  |               |
| Global                       | 22.7 | 1.4e-10 | <b>1.0e-9</b>  | -0.0043  | -0.0067; -0.0018 | <b>2.0e-4</b>     | -0.0019 | -0.0035; -3.4e-4 | <b>0.013</b>  |
| Body of corpus callosum      | 11.4 | 1.1e-5  | <b>2.5e-5</b>  | -0.0048  | -0.0086; -0.0010 | <b>0.0097</b>     | -0.0021 | -0.0045; 3.4e-4  | 0.11          |
| Genu of corpus callosum      | 15.3 | 2.3e-7  | <b>8.4e-7</b>  | -0.0059  | -0.010; -0.0016  | <b>0.0048</b>     | -0.0017 | -0.0044; 0.0010  | 0.28          |
| Cingulum cingulate           | 6.5  | 1.5e-3  | <b>2.5e-3</b>  | -0.0022  | -0.0065; 0.0021  | 0.42              | -0.0026 | -0.0053; 9.7e-5  | 0.061         |
| Cingulum hippocampus         | 7.5  | 5.7e-4  | <b>9.7e-4</b>  | -0.00012 | -0.0046; 0.0044  | 1.00              | -0.0036 | -0.0064; -7.5e-4 | <b>0.010</b>  |
| <i>Mean diffusivity</i>      |      |         |                |          |                  |                   |         |                  |               |
| Global                       | 29.1 | 2.4e-13 | <b>6.1e-12</b> | 7.1e-6   | 3.7e-6; 1.1e-5   | <b>&lt;0.0001</b> | 2.5e-6  | 3.1e-7; 4.7e-6   | <b>0.022</b>  |
| Body of corpus callosum      | 17.1 | 3.6e-8  | <b>1.9e-7</b>  | 7.5e-6   | 2.8e-6; 1.2e-5   | <b>7.0e-4</b>     | 3.7e-6  | 6.9e-7; 6.6e-6   | <b>0.012</b>  |
| Genu of corpus callosum      | 21.6 | 4.3e-10 | <b>2.6e-9</b>  | 9.5e-6   | 3.9e-6; 1.5e-5   | <b>3.0e-4</b>     | 3.6e-6  | 2.9e-8; 7.1e-6   | <b>0.048</b>  |
| Splenium of corpus callosum  | 9.9  | 5.2e-5  | <b>9.4e-5</b>  | 4.6e-6   | 7.3e-7; 8.4e-6   | <b>0.016</b>      | 4.2e-6  | 1.8e-6; 6.7e-6   | <b>2.0e-4</b> |
| Cingulum cingulate           | 5.3  | 5.2e-3  | <b>7.5e-3</b>  | 2.6e-6   | -9.4e-7; 6.1e-6  | 0.19              | 2.6e-6  | 3.6e-7; 4.8e-6   | <b>0.019</b>  |
| Cingulum hippocampus         | 13.7 | 1.1e-6  | <b>3.4e-6</b>  | 4.4e-6   | 2.5e-7; 8.6e-6   | <b>0.035</b>      | 4.3e-6  | 1.6e-6; 6.9e-6   | <b>6.0e-4</b> |
| Uncinate fasciculus          | 11.3 | 1.2e-5  | <b>2.5e-5</b>  | 5.8e-6   | 1.9e-6; 9.7e-6   | <b>0.0018</b>     | 2.4e-6  | -8.8e-8; 4.8e-6  | 0.061         |

\* Adjusted mean difference, calculated using linear models, adjusted for age, sex, education, X-, Y-, and Z-position of the head in the scanner, head size, assessment centre, and year of imaging acquisition.

P<sub>FDR</sub>, Benjamini-Hochberg false discovery rate corrected P values; SE, standard error. P values in bold are statistically significant (P < 0.05).

**Supplement 17.** Cognitive outcome measures of systemic glucocorticoid users (n = 222) and inhaled glucocorticoid users (n = 557) vs. controls (after exclusion of outlier values per group per variable)

|                            | ANOVA   |         |                  | Systemic GC vs. controls |              | Inhaled GC vs. controls |        |             | Participants with available data, n (%) |             |            |            |
|----------------------------|---------|---------|------------------|--------------------------|--------------|-------------------------|--------|-------------|-----------------------------------------|-------------|------------|------------|
|                            | F value | P value | P <sub>FDR</sub> | AMD*                     | 95% CI       | P value                 | AMD*   | 95% CI      | P value                                 | Systemic GC | Inhaled GC | Controls   |
| <b>Trail making A</b>      | 5.2     | 0.0057  | <b>0.011</b>     | -0.10                    | -0.25; 0.05  | 0.25                    | -0.018 | -0.12; 0.09 | 0.88                                    | 143 (64)    | 286 (51)   | 15996 (66) |
| <b>Trail making B</b>      | 9.6     | 6.8e-5  | <b>2.0e-4</b>    | -0.16                    | -0.32; -0.01 | <b>0.038</b>            | -0.064 | -0.17; 0.04 | 0.31                                    | 137 (62)    | 289 (52)   | 15733 (65) |
| <b>Symbol substitution</b> | 11.6    | 8.9e-6  | <b>5.3e-5</b>    | -0.18                    | -0.34; -0.02 | <b>0.021</b>            | -0.046 | -0.16; 0.06 | 0.55                                    | 141 (64)    | 295 (53)   | 16270 (67) |

\* Adjusted mean difference between patients and controls, expressed in Z scores. Calculated using linear models, adjusted for age, sex, and education. Trail making A, and trail making B were log transformed before generation of Z scores because they were non-normally distributed. Variables were transformed such that higher values indicate a better performance.

GC, glucocorticoids; P<sub>FDR</sub>, Benjamini-Hochberg false discovery rate corrected P values.

### Supplement 18. STROBE Statement – Checklist of items that should be included in reports of cohort studies

|                              | Item No | Recommendation                                                                                                                                                                       | Where to be found                                                                          |
|------------------------------|---------|--------------------------------------------------------------------------------------------------------------------------------------------------------------------------------------|--------------------------------------------------------------------------------------------|
| <b>Title and abstract</b>    | 1       | (a) Indicate the study's design with a commonly used term in the title or the abstract                                                                                               | Abstract: Design (p.2)                                                                     |
|                              |         | (b) Provide in the abstract an informative and balanced summary of what was done and what was found                                                                                  | Abstract: Main outcome measures, Results (p.2)                                             |
| <b>Introduction</b>          |         |                                                                                                                                                                                      |                                                                                            |
| Background/<br>rationale     | 2       | Explain the scientific background and rationale for the investigation being reported                                                                                                 | Introduction (p.4)                                                                         |
| Objectives                   | 3       | State specific objectives, including any prespecified hypotheses                                                                                                                     | Introduction (p.4)                                                                         |
| <b>Methods</b>               |         |                                                                                                                                                                                      |                                                                                            |
| Study design                 | 4       | Present key elements of study design early in the paper                                                                                                                              | Study design (p.5)                                                                         |
| Setting                      | 5       | Describe the setting, locations, and relevant dates, including periods of recruitment, exposure, follow-up, and data collection                                                      | Study design, Data collection (p.5)                                                        |
| Participants                 | 6       | (a) Give the eligibility criteria, and the sources and methods of selection of participants. Describe methods of follow-up                                                           | Participants (pp.5-6)                                                                      |
|                              |         | (b) For matched studies, give matching criteria and number of exposed and unexposed                                                                                                  | <i>Not applicable</i>                                                                      |
| Variables                    | 7       | Clearly define all outcomes, exposures, predictors, potential confounders, and effect modifiers. Give diagnostic criteria, if applicable                                             | Data collection, Imaging data, Cognitive and Emotional data, Statistical analysis (pp.5-9) |
| Data sources/<br>measurement | 8       | For each variable of interest, give sources of data and details of methods of assessment (measurement). Describe comparability of assessment methods if there is more than one group | Data collection, Imaging data, Cognitive and Emotional data (pp.5-7)                       |
| Bias                         | 9       | Describe any efforts to address potential sources of bias                                                                                                                            | Statistical analysis (pp.7-9)                                                              |
| Study size                   | 10      | Explain how the study size was arrived at                                                                                                                                            | Participants (pp.5-6)                                                                      |
| Quantitative variables       | 11      | Explain how quantitative variables were handled in the analyses. If applicable, describe which groupings were chosen and why                                                         | Statistical analysis (pp.7-9)                                                              |
| Statistical methods          | 12      | (a) Describe all statistical methods, including those used to control for confounding                                                                                                | Statistical analysis (pp.7-9)                                                              |
|                              |         | (b) Describe any methods used to examine subgroups and interactions                                                                                                                  |                                                                                            |
|                              |         | (c) Explain how missing data were addressed                                                                                                                                          |                                                                                            |
|                              |         | (d) If applicable, explain how loss to follow-up was addressed                                                                                                                       |                                                                                            |
|                              |         | (e) Describe any sensitivity analyses                                                                                                                                                |                                                                                            |

| <b>Results</b>           |     |                                                                                                                                                                                                                                                                                                                                                                                                                 |                                                                                                            |
|--------------------------|-----|-----------------------------------------------------------------------------------------------------------------------------------------------------------------------------------------------------------------------------------------------------------------------------------------------------------------------------------------------------------------------------------------------------------------|------------------------------------------------------------------------------------------------------------|
| Participants             | 13  | (a) Report numbers of individuals at each stage of study – e.g. numbers potentially eligible, examined for eligibility, confirmed eligible, included in the study, completing follow-up, and analyzed<br>(b) Give reasons for non-participation at each stage<br>(c) Consider use of a flow diagram                                                                                                             | Demographic characteristics (p.10) and Figure 1                                                            |
| Descriptive data         | 14  | (a) Give characteristics of study participants (e.g. demographic, clinical, social) and information on exposures and potential confounders<br>(b) Indicate number of participants with missing data for each variable of interest<br>(c) Summarize follow-up time (e.g., average and total amount)                                                                                                              | Demographic characteristics (p.10) and Table 1<br><br><i>Not applicable</i>                                |
| Outcome data             | 15* | Report numbers of outcome events or summary measures over time                                                                                                                                                                                                                                                                                                                                                  | Results (pp.12-19)                                                                                         |
| Main results             | 16  | (a) Give unadjusted estimates and, if applicable, confounder-adjusted estimates and their precision (e.g., 95% confidence interval). Make clear which confounders were adjusted for and why they were included<br>(b) Report category boundaries when continuous variables were categorized<br>(c) If relevant, consider translating estimates of relative risk into absolute risk for a meaningful time period | Results (pp.12-19), Tables 2-4, Supplements<br><br>Statistical analysis (p.8)<br><br><i>Not applicable</i> |
| Other analyses           | 17  | Report other analyses done – e.g. analyses of subgroups and interactions, and sensitivity analyses                                                                                                                                                                                                                                                                                                              | Results (p.20), Supplements                                                                                |
| <b>Discussion</b>        |     |                                                                                                                                                                                                                                                                                                                                                                                                                 |                                                                                                            |
| Key results              | 18  | Summarize key results with reference to study objectives                                                                                                                                                                                                                                                                                                                                                        | Discussion (pp.21-22)                                                                                      |
| Limitations              | 19  | Discuss limitations of the study, taking into account sources of potential bias or imprecision. Discuss both direction and magnitude of any potential bias                                                                                                                                                                                                                                                      | Strengths and limitations (pp.23-25)                                                                       |
| Interpretation           | 20  | Give a cautious overall interpretation of results considering objectives, limitations, multiplicity of analyses, results from similar studies, and other relevant evidence                                                                                                                                                                                                                                      | Findings in context, Potential consequences and implications (pp.21-23)                                    |
| Generalizability         | 21  | Discuss the generalizability (external validity) of the study results                                                                                                                                                                                                                                                                                                                                           | Strengths and limitations (pp.23-25)                                                                       |
| <b>Other information</b> |     |                                                                                                                                                                                                                                                                                                                                                                                                                 |                                                                                                            |
| Funding                  | 22  | Give the source of funding and the role of the funders for the present study and, if applicable, for the original study on which the present article is based                                                                                                                                                                                                                                                   | Funding (p.26)                                                                                             |
