# Supplementary material for: Association between use of systemic and inhaled glucocorticoids and changes in brain volume and white matter microstructure: a cross-sectional study using data from the UK Biobank
Source: BMJ Open. 2022 Jul 28;12(8):e062446. doi: 10.1136/bmjopen-2022-062446 (PMC9438037; doi:10.1136/bmjopen-2022-062446)
Supplement: Supplementary data [file bmjopen-2022-062446supp001.xlsx]

## Sheet: ReadMe
This file contains all UK Biobank codes used for the selection (inclusion/exclusion) of participants. Patients were included based on systemic or inhalation glucocorticoid (GC) use and availability of imaging parameters; and were excluded based on psychiatric, neurological or endocrinological comorbidity and use of psychotropic drugs. Moreover, this file lists all outcome variables used in the an…

## Sheet: Systemic GC (inclusion)
Field ID	Code	Description
20003	1140874790	betamethasone
20003	1140874816	dexamethasone
20003	1140874954	hydrocortistab 20mg tablet
20003	1140874956	hydrocortone 10mg tablet
20003	1140874978	medrone 2mg tablet
20003	1140874976	methylprednisolone
20003	1140874950	prednesol 5mg tablet
20003	1140874930	prednisolone
20003	1141157402	prednisolone product
20003	1140868364	prednisone
20003	1140884704	cortisone product
20003	1140874896	hydrocortisone
20003	1140910424	hc - hydrocortisone
20003	1141157294	hydrocortisone product
20003	1141173346	cortisone
20003	1140874944	precortisyl 1mg tablet
20003	1140857532	cortelan 25mg tablet
20003	1140857534	oradexon 500micrograms tablet
20003	1140868370	decortisyl 5mg tablet
20003	1140868426	triamcinolone
20003	1140868434	ledercort 2mg tablet
20003	1140851210	cortenema 100mg/60ml enema
20003	1140874792	betnelan 500mcg tablet
20003	1140874794	betnesol 500mcg soluble tablet
20003	1140874810	cortistab 5mg tablet
20003	1140874814	cortisyl 25mg tablet
20003	1140874822	decadron 500micrograms tablet
20003	1140874936	deltacortril enteric 2.5mg e/c tablet
20003	1140874940	deltastab 1mg tablet
20003	1140910634	deltahydrocortisone
20003	1140910484	cortisol product

## Sheet: Inhaled GC (inclusion)
Field ID	Code	Description
20003	1140855466	bextasol 100micrograms inhaler
20003	1140881922	becodisks 100micrograms disks+diskhaler
20003	1140881938	beclomethasone dipropionate+salbutamol
20003	1141167594	qvar 50 inhaler
20003	1141174512	budesonide+eformoterol
20003	1141174520	symbicort 100/6 turbohaler
20003	1140862572	budesonide
20003	1140862574	pulmicort ls 50micrograms inhaler
20003	1140862584	pulmicort ls 50micrograms spacer inhaler
20003	1140862476	beclazone 50 inhaler
20003	1140862380	becloforte 250micrograms inhaler
20003	1140862474	aerobec 50mcg autohaler
20003	1140862382	becotide 50 inhaler
20003	1140888098	fluticasone
20003	1141164086	salmeterol+fluticasone propionate
20003	1141176832	seretide 50 evohaler
20003	1141176842	dexsol 2mg/5ml oral solution
20003	1140864286	flixotide 25micrograms inhaler
20003	1141191818	asmanex twisthaler 200mcg breath-actuated dry powder inhaler
20003	1140884654	beclomethasone
20003	1140909786	beclometasone
20003	1141179072	pulvinal beclomethasone diprop 100mcg breath-act dry pdr inh

## Sheet: Imaging parameters (inclusion)
Field ID	Description
25010	Volume of brain, grey+white matter
25008	Volume of white matter
25006	Volume of grey matter
25002	Volume of peripheral cortical grey matter
25004	Volume of ventricular cerebrospinal fluid
25888	Volume of grey matter in Amygdala (left)
25889	Volume of grey matter in Amygdala (right)
25880	Volume of grey matter in Caudate (left)
25881	Volume of grey matter in Caudate (right)
25838	Volume of grey matter in Cingulate Gyrus, anterior division (left)
25839	Volume of grey matter in Cingulate Gyrus, anterior division (right)
25840	Volume of grey matter in Cingulate Gyrus, posterior division (left)
25841	Volume of grey matter in Cingulate Gyrus, posterior division (right)
25886	Volume of grey matter in Hippocampus (left)
25887	Volume of grey matter in Hippocampus (right)
25784	Volume of grey matter in Insular Cortex (left)
25785	Volume of grey matter in Insular Cortex (right)
25788	Volume of grey matter in Middle Frontal Gyrus (left)
25789	Volume of grey matter in Middle Frontal Gyrus (right)
25844	Volume of grey matter in Cuneal Cortex (left)
25845	Volume of grey matter in Cuneal Cortex (right)
25842	Volume of grey matter in Precuneous Cortex (left)
25843	Volume of grey matter in Precuneous Cortex (right)
25900	Volume of grey matter in Crus I Cerebellum (left)
25902	Volume of grey matter in Crus I Cerebellum (right)
25901	Volume of grey matter in Crus I Cerebellum (vermis)
25903	Volume of grey matter in Crus II Cerebellum (left)
25905	Volume of grey matter in Crus II Cerebellum (right)
25904	Volume of grey matter in Crus II Cerebellum (vermis)
25893	Volume of grey matter in I-IV Cerebellum (left)
25894	Volume of grey matter in I-IV Cerebellum (right)
25915	Volume of grey matter in IX Cerebellum (left)
25917	Volume of grey matter in IX Cerebellum (right)
25916	Volume of grey matter in IX Cerebellum (vermis)
25895	Volume of grey matter in V Cerebellum (left)
25896	Volume of grey matter in V Cerebellum (right)
25897	Volume of grey matter in VI Cerebellum (left)
25899	Volume of grey matter in VI Cerebellum (right)
25898	Volume of grey matter in VI Cerebellum (vermis)
25909	Volume of grey matter in VIIIa Cerebellum (left)
25911	Volume of grey matter in VIIIa Cerebellum (right)
25910	Volume of grey matter in VIIIa Cerebellum (vermis)
25912	Volume of grey matter in VIIIb Cerebellum (left)
25914	Volume of grey matter in VIIIb Cerebellum (right)
25913	Volume of grey matter in VIIIb Cerebellum (vermis)
25906	Volume of grey matter in VIIb Cerebellum (left)
25908	Volume of grey matter in VIIb Cerebellum (right)
25907	Volume of grey matter in VIIb Cerebellum (vermis)
25890	Volume of grey matter in Ventral Striatum (left)
25891	Volume of grey matter in Ventral Striatum (right)
25918	Volume of grey matter in X Cerebellum (left)
25919	Volume of grey matter in X Cerebellum (vermis)
25920	Volume of grey matter in X Cerebellum (right)
25023	Volume of accumbens (left)
25024	Volume of accumbens (right)
25021	Volume of amygdala (left)
25022	Volume of amygdala (right)
25013	Volume of caudate (left)
25014	Volume of caudate (right)
25019	Volume of hippocampus (left)
25020	Volume of hippocampus (right)
25017	Volume of pallidum (left)
25018	Volume of pallidum (right)
25015	Volume of putamen (left)
25016	Volume of putamen (right)
25011	Volume of thalamus (left)
25012	Volume of thalamus (right)
25059	Mean FA in body of corpus callosum on FA skeleton
25091	Mean FA in cingulum cingulate gyrus on FA skeleton (left)
25090	Mean FA in cingulum cingulate gyrus on FA skeleton (right)
25093	Mean FA in cingulum hippocampus on FA skeleton (left)
25092	Mean FA in cingulum hippocampus on FA skeleton (right)
25058	Mean FA in genu of corpus callosum on FA skeleton
25060	Mean FA in splenium of corpus callosum on FA skeleton
25101	Mean FA in uncinate fasciculus on FA skeleton (left)
25100	Mean FA in uncinate fasciculus on FA skeleton (right)
25107	Mean MD in body of corpus callosum on FA skeleton
25139	Mean MD in cingulum cingulate gyrus on FA skeleton (left)
25138	Mean MD in cingulum cingulate gyrus on FA skeleton (right)
25141	Mean MD in cingulum hippocampus on FA skeleton (left)
25140	Mean MD in cingulum hippocampus on FA skeleton (right)
25106	Mean MD in genu of corpus callosum on FA skeleton
25108	Mean MD in splenium of corpus callosum on FA skeleton
25149	Mean MD in uncinate fasciculus on FA skeleton (left)
25148	Mean MD in uncinate fasciculus on FA skeleton (right)
For the calculation of the global FA and global MD values, all available mean FA and mean MD were averaged, respectively:
Field ID	Description
25079	Mean FA in anterior corona radiata on FA skeleton (left)
25078	Mean FA in anterior corona radiata on FA skeleton (right)
25073	Mean FA in anterior limb of internal capsule on FA skeleton (left)
25072	Mean FA in anterior limb of internal capsule on FA skeleton (right)
25059	Mean FA in body of corpus callosum on FA skeleton
25071	Mean FA in cerebral peduncle on FA skeleton (left)
25070	Mean FA in cerebral peduncle on FA skeleton (right)
25091	Mean FA in cingulum cingulate gyrus on FA skeleton (left)
25090	Mean FA in cingulum cingulate gyrus on FA skeleton (right)
25093	Mean FA in cingulum hippocampus on FA skeleton (left)
25092	Mean FA in cingulum hippocampus on FA skeleton (right)
25063	Mean FA in corticospinal tract on FA skeleton (left)
25062	Mean FA in corticospinal tract on FA skeleton (right)
25089	Mean FA in external capsule on FA skeleton (left)
25088	Mean FA in external capsule on FA skeleton (right)
25095	Mean FA in fornix cres+stria terminalis on FA skeleton (left)
25094	Mean FA in fornix cres+stria terminalis on FA skeleton (right)
25061	Mean FA in fornix on FA skeleton
25058	Mean FA in genu of corpus callosum on FA skeleton
25067	Mean FA in inferior cerebellar peduncle on FA skeleton (left)
25066	Mean FA in inferior cerebellar peduncle on FA skeleton (right)
25065	Mean FA in medial lemniscus on FA skeleton (left)
25064	Mean FA in medial lemniscus on FA skeleton (right)
25056	Mean FA in middle cerebellar peduncle on FA skeleton
25057	Mean FA in pontine crossing tract on FA skeleton
25083	Mean FA in posterior corona radiata on FA skeleton (left)
25082	Mean FA in posterior corona radiata on FA skeleton (right)
25075	Mean FA in posterior limb of internal capsule on FA skeleton (left)
25074	Mean FA in posterior limb of internal capsule on FA skeleton (right)
25085	Mean FA in posterior thalamic radiation on FA skeleton (left)
25084	Mean FA in posterior thalamic radiation on FA skeleton (right)
25077	Mean FA in retrolenticular part of internal capsule on FA skeleton (left)
25076	Mean FA in retrolenticular part of internal capsule on FA skeleton (right)
25087	Mean FA in sagittal stratum on FA skeleton (left)
25086	Mean FA in sagittal stratum on FA skeleton (right)
25060	Mean FA in splenium of corpus callosum on FA skeleton
25069	Mean FA in superior cerebellar peduncle on FA skeleton (left)
25068	Mean FA in superior cerebellar peduncle on FA skeleton (right)
25081	Mean FA in superior corona radiata on FA skeleton (left)
25080	Mean FA in superior corona radiata on FA skeleton (right)
25099	Mean FA in superior fronto-occipital fasciculus on FA skeleton (left)
25098	Mean FA in superior fronto-occipital fasciculus on FA skeleton (right)
25097	Mean FA in superior longitudinal fasciculus on FA skeleton (left)
25096	Mean FA in superior longitudinal fasciculus on FA skeleton (right)
25103	Mean FA in tapetum on FA skeleton (left)
25102	Mean FA in tapetum on FA skeleton (right)
25101	Mean FA in uncinate fasciculus on FA skeleton (left)
25100	Mean FA in uncinate fasciculus on FA skeleton (right)
25127	Mean MD in anterior corona radiata on FA skeleton (left)
25126	Mean MD in anterior corona radiata on FA skeleton (right)
25121	Mean MD in anterior limb of internal capsule on FA skeleton (left)
25120	Mean MD in anterior limb of internal capsule on FA skeleton (right)
25107	Mean MD in body of corpus callosum on FA skeleton
25119	Mean MD in cerebral peduncle on FA skeleton (left)
25118	Mean MD in cerebral peduncle on FA skeleton (right)
25139	Mean MD in cingulum cingulate gyrus on FA skeleton (left)
25138	Mean MD in cingulum cingulate gyrus on FA skeleton (right)
25141	Mean MD in cingulum hippocampus on FA skeleton (left)
25140	Mean MD in cingulum hippocampus on FA skeleton (right)
25111	Mean MD in corticospinal tract on FA skeleton (left)
25110	Mean MD in corticospinal tract on FA skeleton (right)
25137	Mean MD in external capsule on FA skeleton (left)
25136	Mean MD in external capsule on FA skeleton (right)
25143	Mean MD in fornix cres+stria terminalis on FA skeleton (left)
25142	Mean MD in fornix cres+stria terminalis on FA skeleton (right)
25109	Mean MD in fornix on FA skeleton
25106	Mean MD in genu of corpus callosum on FA skeleton
25115	Mean MD in inferior cerebellar peduncle on FA skeleton (left)
25114	Mean MD in inferior cerebellar peduncle on FA skeleton (right)
25113	Mean MD in medial lemniscus on FA skeleton (left)
25112	Mean MD in medial lemniscus on FA skeleton (right)
25104	Mean MD in middle cerebellar peduncle on FA skeleton
25105	Mean MD in pontine crossing tract on FA skeleton
25131	Mean MD in posterior corona radiata on FA skeleton (left)
25130	Mean MD in posterior corona radiata on FA skeleton (right)
25123	Mean MD in posterior limb of internal capsule on FA skeleton (left)
25122	Mean MD in posterior limb of internal capsule on FA skeleton (right)
25133	Mean MD in posterior thalamic radiation on FA skeleton (left)
25132	Mean MD in posterior thalamic radiation on FA skeleton (right)
25125	Mean MD in retrolenticular part of internal capsule on FA skeleton (left)
25124	Mean MD in retrolenticular part of internal capsule on FA skeleton (right)
25135	Mean MD in sagittal stratum on FA skeleton (left)
25134	Mean MD in sagittal stratum on FA skeleton (right)
25108	Mean MD in splenium of corpus callosum on FA skeleton
25117	Mean MD in superior cerebellar peduncle on FA skeleton (left)
25116	Mean MD in superior cerebellar peduncle on FA skeleton (right)
25129	Mean MD in superior corona radiata on FA skeleton (left)
25128	Mean MD in superior corona radiata on FA skeleton (right)
25147	Mean MD in superior fronto-occipital fasciculus on FA skeleton (left)
25146	Mean MD in superior fronto-occipital fasciculus on FA skeleton (right)
25145	Mean MD in superior longitudinal fasciculus on FA skeleton (left)
25144	Mean MD in superior longitudinal fasciculus on FA skeleton (right)
25151	Mean MD in tapetum on FA skeleton (left)
25150	Mean MD in tapetum on FA skeleton (right)
25149	Mean MD in uncinate fasciculus on FA skeleton (left)
25148	Mean MD in uncinate fasciculus on FA skeleton (right)

## Sheet: Psychiatric-neurological (excl)
Codes for the psychiatric and neurological conditions used as exclusion criteria
Field ID	Code	Description
20002	1081	stroke
20002	1082	transient ischaemic attack (tia)
20002	1083	subdural haemorrhage/haematoma
20002	1086	subarachnoid haemorrhage
20002	1240	neurological injury/trauma
20002	1243	psychological/psychiatric problem
20002	1244	infection of nervous system
20002	1245	brain abscess/intracranial abscess
20002	1246	encephalitis
20002	1247	meningitis
20002	1248	spinal abscess
20002	1249	cranial nerve problem/palsy
20002	1250	bell's palsy/facial nerve palsy
20002	1251	spinal cord disorder
20002	1252	paraplegia
20002	1254	peripheral nerve disorder
20002	1255	peripheral neuropathy
20002	1256	acute infective polyneuritis/guillain-barre syndrome
20002	1257	trapped nerve/compressed nerve
20002	1258	chronic/degenerative neurological problem
20002	1259	motor neuron disease
20002	1260	myasthenia gravis
20002	1261	multiple sclerosis
20002	1262	Parkinson’s disease
20002	1263	dementia/Alzheimer’s/cognitive impairment
20002	1264	epilepsy
20002	1265	migraine
20002	1266	head injury
20002	1267	spinal injury
20002	1289	schizophrenia
20002	1394	peripheral nerve injury
20002	1397	other demyelinating disease (not multiple sclerosis)
20002	1408	alcohol dependency
20002	1409	opioid dependency
20002	1410	other substance abuse/dependency
20002	1425	cerebral aneurysm
20002	1433	cerebral palsy
20002	1436	headaches (not migraine)
20002	1437	myasthenia gravis
20002	1469	post-traumatic stress disorder
20002	1470	anorexia/bulimia/other eating disorder
20002	1491	brain haemorrhage
20002	1531	post-natal depression
20002	1659	meningioma / benign meningeal tumour
20001	1031	meningeal cancer / malignant meningioma
20001	1032	brain cancer / primary malignant brain tumour
20001	1033	spinal cord or cranial nerve cancer
41270	C700	C70.0 Cerebral meninges
41270	C701	C70.1 Spinal meninges
41270	C709	C70.9 Meninges, unspecified
41270	C710	C71.0 Cerebrum, except lobes and ventricles
41270	C711	C71.1 Frontal lobe
41270	C712	C71.2 Temporal lobe
41270	C713	C71.3 Parietal lobe
41270	C714	C71.4 Occipital lobe
41270	C715	C71.5 Cerebral ventricle
41270	C716	C71.6 Cerebellum
41270	C717	C71.7 Brain stem
41270	C718	C71.8 Overlapping lesion of brain
41270	C719	C71.9 Brain, unspecified
41270	C720	C72.0 Spinal cord
41270	C721	C72.1 Cauda equina
41270	C722	C72.2 Olfactory nerve
41270	C723	C72.3 Optic nerve
41270	C724	C72.4 Acoustic nerve
41270	C725	C72.5 Other and unspecified cranial nerves
41270	C728	C72.8 Overlapping lesion of brain and other parts of central nervous system
41270	C729	C72.9 Central nervous system, unspecified
41270	F000	F00.0 Dementia in Alzheimer's disease with early onset
41270	F001	F00.1 Dementia in Alzheimer's disease with late onset
41270	F002	F00.2 Dementia in Alzheimer's disease, atypical or mixed type
41270	F009	F00.9 Dementia in Alzheimer's disease, unspecified
41270	F010	F01.0 Vascular dementia of acute onset
41270	F011	F01.1 Multi-infarct dementia
41270	F012	F01.2 Subcortical vascular dementia
41270	F013	F01.3 Mixed cortical and subcortical vascular dementia
41270	F018	F01.8 Other vascular dementia
41270	F019	F01.9 Vascular dementia, unspecified
41270	F020	F02.0 Dementia in Pick's disease
41270	F021	F02.1 Dementia in Creutzfeldt-Jakob disease
41270	F022	F02.2 Dementia in Huntington's disease
41270	F023	F02.3 Dementia in Parkinson's disease
41270	F024	F02.4 Dementia in human immunodeficiency virus [HIV] disease
41270	F028	F02.8 Dementia in other specified diseases classified elsewhere
41270	F03	F03 Unspecified dementia
41270	F04	F04 Organic amnesic syndrome, not induced by alcohol and other psychoactive substances
41270	F051	F05.1 Delirium superimposed on dementia
41270	F060	F06.0 Organic hallucinosis
41270	F061	F06.1 Organic catatonic disorder
41270	F062	F06.2 Organic delusional [schizophrenia-like] disorder
41270	F065	F06.5 Organic dissociative disorder
41270	F066	F06.6 Organic emotionally labile [asthenic] disorder
41270	F067	F06.7 Mild cognitive disorder
41270	F068	F06.8 Other specified mental disorders due to brain damage and dysfunction and to physical disease
41270	F069	F06.9 Unspecified mental disorder due to brain damage and dysfunction and to physical disease
41270	F070	F07.0 Organic personality disorder
41270	F071	F07.1 Postencephalitic syndrome
41270	F072	F07.2 Postconcussional syndrome
41270	F078	F07.8 Other organic personality and behavioural disorders due to brain disease, damage and dysfunction
41270	F079	F07.9 Unspecified organic personality and behavioural disorder due to brain disease, damage and dysfunction
41270	F09	F09 Unspecified organic or symptomatic mental disorder
41270	F100	F10.0 Acute intoxication
41270	F101	F10.1 Harmful use
41270	F102	F10.2 Dependence syndrome
41270	F103	F10.3 Withdrawal state
41270	F104	F10.4 Withdrawal state with delirium
41270	F105	F10.5 Psychotic disorder
41270	F106	F10.6 Amnesic syndrome
41270	F107	F10.7 Residual and late-onset psychotic disorder
41270	F108	F10.8 Other mental and behavioural disorders
41270	F109	F10.9 Unspecified mental and behavioural disorder
41270	F110	F11.0 Acute intoxication
41270	F111	F11.1 Harmful use
41270	F112	F11.2 Dependence syndrome
41270	F113	F11.3 Withdrawal state
41270	F114	F11.4 Withdrawal state with delirium
41270	F115	F11.5 Psychotic disorder
41270	F117	F11.7 Residual and late-onset psychotic disorder
41270	F119	F11.9 Unspecified mental and behavioural disorder
41270	F120	F12.0 Acute intoxication
41270	F121	F12.1 Harmful use
41270	F122	F12.2 Dependence syndrome
41270	F123	F12.3 Withdrawal state
41270	F125	F12.5 Psychotic disorder
41270	F128	F12.8 Other mental and behavioural disorders
41270	F129	F12.9 Unspecified mental and behavioural disorder
41270	F130	F13.0 Acute intoxication
41270	F131	F13.1 Harmful use
41270	F132	F13.2 Dependence syndrome
41270	F133	F13.3 Withdrawal state
41270	F134	F13.4 Withdrawal state with delirium
41270	F139	F13.9 Unspecified mental and behavioural disorder
41270	F140	F14.0 Acute intoxication
41270	F141	F14.1 Harmful use
41270	F142	F14.2 Dependence syndrome
41270	F145	F14.5 Psychotic disorder
41270	F149	F14.9 Unspecified mental and behavioural disorder
41270	F150	F15.0 Acute intoxication
41270	F151	F15.1 Harmful use
41270	F152	F15.2 Dependence syndrome
41270	F153	F15.3 Withdrawal state
41270	F155	F15.5 Psychotic disorder
41270	F158	F15.8 Other mental and behavioural disorders
41270	F159	F15.9 Unspecified mental and behavioural disorder
41270	F161	F16.1 Harmful use
41270	F162	F16.2 Dependence syndrome
41270	F163	F16.3 Withdrawal state
41270	F165	F16.5 Psychotic disorder
41270	F167	F16.7 Residual and late-onset psychotic disorder
41270	F168	F16.8 Other mental and behavioural disorders
41270	F169	F16.9 Unspecified mental and behavioural disorder
41270	F170	F17.0 Acute intoxication
41270	F171	F17.1 Harmful use
41270	F172	F17.2 Dependence syndrome
41270	F173	F17.3 Withdrawal state
41270	F174	F17.4 Withdrawal state with delirium
41270	F177	F17.7 Residual and late-onset psychotic disorder
41270	F179	F17.9 Unspecified mental and behavioural disorder
41270	F181	F18.1 Harmful use
41270	F182	F18.2 Dependence syndrome
41270	F183	F18.3 Withdrawal state
41270	F185	F18.5 Psychotic disorder
41270	F189	F18.9 Unspecified mental and behavioural disorder
41270	F190	F19.0 Acute intoxication
41270	F191	F19.1 Harmful use
41270	F192	F19.2 Dependence syndrome
41270	F193	F19.3 Withdrawal state
41270	F194	F19.4 Withdrawal state with delirium
41270	F195	F19.5 Psychotic disorder
41270	F198	F19.8 Other mental and behavioural disorders
41270	F199	F19.9 Unspecified mental and behavioural disorder
41270	F200	F20.0 Paranoid schizophrenia
41270	F201	F20.1 Hebephrenic schizophrenia
41270	F202	F20.2 Catatonic schizophrenia
41270	F203	F20.3 Undifferentiated schizophrenia
41270	F204	F20.4 Postschizophrenic depression
41270	F205	F20.5 Residual schizophrenia
41270	F206	F20.6 Simple schizophrenia
41270	F208	F20.8 Other schizophrenia
41270	F209	F20.9 Schizophrenia, unspecified
41270	F21	F21 Schizotypal disorder
41270	F220	F22.0 Delusional disorder
41270	F228	F22.8 Other persistent delusional disorders
41270	F229	F22.9 Persistent delusional disorder, unspecified
41270	F230	F23.0 Acute polymorphic psychotic disorder without symptoms of schizophrenia
41270	F231	F23.1 Acute polymorphic psychotic disorder with symptoms of schizophrenia
41270	F232	F23.2 Acute schizophrenia-like psychotic disorder
41270	F233	F23.3 Other acute predominantly delusional psychotic disorders
41270	F238	F23.8 Other acute and transient psychotic disorders
41270	F239	F23.9 Acute and transient psychotic disorder, unspecified
41270	F24	F24 Induced delusional disorder
41270	F250	F25.0 Schizoaffective disorder, manic type
41270	F251	F25.1 Schizoaffective disorder, depressive type
41270	F252	F25.2 Schizoaffective disorder, mixed type
41270	F258	F25.8 Other schizoaffective disorders
41270	F259	F25.9 Schizoaffective disorder, unspecified
41270	F28	F28 Other nonorganic psychotic disorders
41270	F29	F29 Unspecified nonorganic psychosis
41270	F431	F43.1 Posttraumatic stress disorder
41270	F432	F43.2 Adjustment disorders
41270	F438	F43.8 Other reactions to severe stress
41270	F439	F43.9 Reaction to severe stress, unspecified
41270	F440	F44.0 Dissociative amnesia
41270	F441	F44.1 Dissociative fugue
41270	F442	F44.2 Dissociative stupor
41270	F443	F44.3 Trance and possession disorders
41270	F444	F44.4 Dissociative motor disorders
41270	F445	F44.5 Dissociative convulsions
41270	F446	F44.6 Dissociative anaesthesia and sensory loss
41270	F447	F44.7 Mixed dissociative [conversion] disorders
41270	F448	F44.8 Other dissociative [conversion] disorders
41270	F449	F44.9 Dissociative [conversion] disorder, unspecified
41270	F450	F45.0 Somatisation disorder
41270	F451	F45.1 Undifferentiated somatoform disorder
41270	F452	F45.2 Hypochondriacal disorder
41270	F453	F45.3 Somatoform autonomic dysfunction
41270	F454	F45.4 Persistent somatoform pain disorder
41270	F458	F45.8 Other somatoform disorders
41270	F459	F45.9 Somatoform disorder, unspecified
41270	F480	F48.0 Neurasthenia
41270	F481	F48.1 Depersonalisation-derealisation syndrome
41270	F488	F48.8 Other specified neurotic disorders
41270	F489	F48.9 Neurotic disorder, unspecified
41270	F500	F50.0 Anorexia nervosa
41270	F501	F50.1 Atypical anorexia nervosa
41270	F502	F50.2 Bulimia nervosa
41270	F505	F50.5 Vomiting associated with other psychological disturbances
41270	F508	F50.8 Other eating disorders
41270	F509	F50.9 Eating disorder, unspecified
41270	F530	F53.0 Mild mental and behavioural disorders associated with the puerperium, not elsewhere classified
41270	F531	F53.1 Severe mental and behavioural disorders associated with the puerperium, not elsewhere classified
41270	F538	F53.8 Other mental and behavioural disorders associated with the puerperium, not elsewhere classified
41270	F539	F53.9 Puerperal mental disorder, unspecified
41270	F54	F54 Psychological and behavioural factors associated with disorders or diseases classified elsewhere
41270	F55	F55 Abuse of non-dependence-producing substances
41270	F59	F59 Unspecified behavioural syndromes associated with physiological disturbances and physical factors
41270	F600	F60.0 Paranoid personality disorder
41270	F601	F60.1 Schizoid personality disorder
41270	F602	F60.2 Dissocial personality disorder
41270	F603	F60.3 Emotionally unstable personality disorder
41270	F604	F60.4 Histrionic personality disorder
41270	F605	F60.5 Anankastic personality disorder
41270	F606	F60.6 Anxious [avoidant] personality disorder
41270	F607	F60.7 Dependent personality disorder
41270	F608	F60.8 Other specific personality disorders
41270	F609	F60.9 Personality disorder, unspecified
41270	F61	F61 Mixed and other personality disorders
41270	F620	F62.0 Enduring personality change after catastrophic experience
41270	F621	F62.1 Enduring personality change after psychiatric illness
41270	F628	F62.8 Other enduring personality changes
41270	F629	F62.9 Enduring personality change, unspecified
41270	F630	F63.0 Pathological gambling
41270	F631	F63.1 Pathological fire-setting [pyromania]
41270	F632	F63.2 Pathological stealing [kleptomania]
41270	F633	F63.3 Trichotillomania
41270	F638	F63.8 Other habit and impulse disorders
41270	F639	F63.9 Habit and impulse disorder, unspecified
41270	F680	F68.0 Elaboration of physical symptoms for psychological reasons
41270	F681	F68.1 Intentional production or feigning of symptoms or disabilities, either physical or psychological [factitious disorder]
41270	F688	F68.8 Other specified disorders of adult personality and behaviour
41270	F69	F69 Unspecified disorder of adult personality and behaviour
41270	F700	F70.0 Mild mental retardation (With the statement of no, or minimal, impairment of behaviour)
41270	F701	F70.1 Mild mental retardation (Significant impairment of behaviour requiring attention or treatment)
41270	F708	F70.8 Mild mental retardation (Other impairments of behaviour)
41270	F709	F70.9 Mild mental retardation (Without mention of impairment of behaviour)
41270	F711	F71.1 Moderate mental retardation (Significant impairment of behaviour requiring attention or treatment)
41270	F719	F71.9 Moderate mental retardation (Without mention of impairment of behaviour)
41270	F729	F72.9 Severe mental retardation (Without mention of impairment of behaviour)
41270	F780	F78.0 Other mental retardation (With the statement of no, or minimal, impairment of behaviour)
41270	F789	F78.9 Other mental retardation (Without mention of impairment of behaviour)
41270	F790	F79.0 Unspecified mental retardation (With the statement of no, or minimal, impairment of behaviour)
41270	F798	F79.8 Unspecified mental retardation (Other impairments of behaviour)
41270	F799	F79.9 Unspecified mental retardation (Without mention of impairment of behaviour)
41270	F800	F80.0 Specific speech articulation disorder
41270	F801	F80.1 Expressive language disorder
41270	F802	F80.2 Receptive language disorder
41270	F803	F80.3 Acquired aphasia with epilepsy [Landau-Kleffner]
41270	F809	F80.9 Developmental disorder of speech and language, unspecified
41270	F810	F81.0 Specific reading disorder
41270	F812	F81.2 Specific disorder of arithmetical skills
41270	F819	F81.9 Developmental disorder of scholastic skills, unspecified
41270	F82	F82 Specific developmental disorder of motor function
41270	F83	F83 Mixed specific developmental disorders
41270	F840	F84.0 Childhood autism
41270	F841	F84.1 Atypical autism
41270	F843	F84.3 Other childhood disintegrative disorder
41270	F844	F84.4 Overactive disorder associated with mental retardation and stereotyped movements
41270	F845	F84.5 Asperger's syndrome
41270	F849	F84.9 Pervasive developmental disorder, unspecified
41270	F89	F89 Unspecified disorder of psychological development
41270	F900	F90.0 Disturbance of activity and attention
41270	F909	F90.9 Hyperkinetic disorder, unspecified
41270	F911	F91.1 Unsocialised conduct disorder
41270	F918	F91.8 Other conduct disorders
41270	F919	F91.9 Conduct disorder, unspecified
41270	F920	F92.0 Depressive conduct disorder
41270	F929	F92.9 Mixed disorder of conduct and emotions, unspecified
41270	F930	F93.0 Separation anxiety disorder of childhood
41270	F940	F94.0 Elective mutism
41270	F941	F94.1 Reactive attachment disorder of childhood
41270	F950	F95.0 Transient tic disorder
41270	F951	F95.1 Chronic motor or vocal tic disorder
41270	F952	F95.2 Combined vocal and multiple motor tic disorder [de la Tourette]
41270	F958	F95.8 Other tic disorders
41270	F959	F95.9 Tic disorder, unspecified
41270	F981	F98.1 Nonorganic encopresis
41270	F985	F98.5 Stuttering [stammering]
41270	F986	F98.6 Cluttering
41270	F988	F98.8 Other specified behavioural and emotional disorders with onset usually occurring in childhood and adolescence
41270	F99	F99 Mental disorder, not otherwise specified
41270	G000	G00.0 Haemophilus meningitis
41270	G001	G00.1 Pneumococcal meningitis
41270	G002	G00.2 Streptococcal meningitis
41270	G003	G00.3 Staphylococcal meningitis
41270	G008	G00.8 Other bacterial meningitis
41270	G009	G00.9 Bacterial meningitis, unspecified
41270	G01	G01 Meningitis in bacterial diseases classified elsewhere
41270	G020	G02.0 Meningitis in viral diseases classified elsewhere
41270	G021	G02.1 Meningitis in mycoses
41270	G030	G03.0 Nonpyogenic meningitis
41270	G031	G03.1 Chronic meningitis
41270	G032	G03.2 Benign recurrent meningitis [Mollaret]
41270	G038	G03.8 Meningitis due to other specified causes
41270	G039	G03.9 Meningitis, unspecified
41270	G040	G04.0 Acute disseminated encephalitis
41270	G042	G04.2 Bacterial meningoencephalitis and meningomyelitis, not elsewhere classified
41270	G048	G04.8 Other encephalitis, myelitis and encephalomyelitis
41270	G049	G04.9 Encephalitis, myelitis and encephalomyelitis, unspecified
41270	G050	G05.0 Encephalitis, myelitis and encephalomyelitis in bacterial diseases classified elsewhere
41270	G051	G05.1 Encephalitis, myelitis and encephalomyelitis in viral diseases classified elsewhere
41270	G052	G05.2 Encephalitis, myelitis and encephalomyelitis in other infectious and parasitic diseases classified elsewhere
41270	G058	G05.8 Encephalitis, myelitis and encephalomyelitis in other diseases classified elsewhere
41270	G060	G06.0 Intracranial abscess and granuloma
41270	G061	G06.1 Intraspinal abscess and granuloma
41270	G062	G06.2 Extradural and subdural abscess, unspecified
41270	G07	G07 Intracranial and intraspinal abscess and granuloma in diseases classified elsewhere
41270	G08	G08 Intracranial and intraspinal phlebitis and thrombophlebitis
41270	G09	G09 Sequelae of inflammatory diseases of central nervous system
41270	G10	G10 Huntington's disease
41270	G110	G11.0 Congenital nonprogressive ataxia
41270	G111	G11.1 Early-onset cerebellar ataxia
41270	G112	G11.2 Late-onset cerebellar ataxia
41270	G113	G11.3 Cerebellar ataxia with defective DNA repair
41270	G114	G11.4 Hereditary spastic paraplegia
41270	G118	G11.8 Other hereditary ataxias
41270	G119	G11.9 Hereditary ataxia, unspecified
41270	G120	G12.0 Infantile spinal muscular atrophy, type I [Werdnig-Hoffman]
41270	G121	G12.1 Other inherited spinal muscular atrophy
41270	G122	G12.2 Motor neuron disease
41270	G128	G12.8 Other spinal muscular atrophies and related syndromes
41270	G129	G12.9 Spinal muscular atrophy, unspecified
41270	G130	G13.0 Paraneoplastic neuromyopathy and neuropathy
41270	G131	G13.1 Other systemic atrophy primarily affecting central nervous system in neoplastic disease
41270	G138	G13.8 Systemic atrophy primarily affecting central nervous system in other diseases classified elsewhere
41270	G14	G14 Postpolio syndrome
41270	G20	G20 Parkinson's disease
41270	G210	G21.0 Malignant neuroleptic syndrome
41270	G211	G21.1 Other drug-induced secondary Parkinsonism
41270	G212	G21.2 Secondary Parkinsonism due to other external agents
41270	G213	G21.3 Postencephalitic Parkinsonism
41270	G214	G21.4 Vascular parkinsonism
41270	G218	G21.8 Other secondary Parkinsonism
41270	G219	G21.9 Secondary Parkinsonism, unspecified
41270	G22	G22 Parkinsonism in diseases classified elsewhere
41270	G230	G23.0 Hallervorden-Spatz disease
41270	G231	G23.1 Progressive supranuclear ophthalmoplegia [Steele-Richardson-Olszewski]
41270	G232	G23.2 Striatonigral degeneration
41270	G233	G23.3 Multiple system atrophy, cerebellar type
41270	G238	G23.8 Other specified degenerative diseases of basal ganglia
41270	G239	G23.9 Degenerative disease of basal ganglia, unspecified
41270	G240	G24.0 Drug-induced dystonia
41270	G241	G24.1 Idiopathic familial dystonia
41270	G242	G24.2 Idiopathic nonfamilial dystonia
41270	G243	G24.3 Spasmodic torticollis
41270	G244	G24.4 Idiopathic orofacial dystonia
41270	G245	G24.5 Blepharospasm
41270	G248	G24.8 Other dystonia
41270	G249	G24.9 Dystonia, unspecified
41270	G250	G25.0 Essential tremor
41270	G251	G25.1 Drug-induced tremor
41270	G252	G25.2 Other specified forms of tremor
41270	G253	G25.3 Myoclonus
41270	G254	G25.4 Drug-induced chorea
41270	G255	G25.5 Other chorea
41270	G258	G25.8 Other specified extrapyramidal and movement disorders
41270	G259	G25.9 Extrapyramidal and movement disorder, unspecified
41270	G300	G30.0 Alzheimer's disease with early onset
41270	G301	G30.1 Alzheimer's disease with late onset
41270	G308	G30.8 Other Alzheimer's disease
41270	G309	G30.9 Alzheimer's disease, unspecified
41270	G310	G31.0 Circumscribed brain atrophy
41270	G311	G31.1 Senile degeneration of brain, not elsewhere classified
41270	G312	G31.2 Degeneration of nervous system due to alcohol
41270	G318	G31.8 Other specified degenerative diseases of nervous system
41270	G319	G31.9 Degenerative disease of nervous system, unspecified
41270	G320	G32.0 Subacute combined degeneration of spinal cord in diseases classified elsewhere
41270	G328	G32.8 Other specified degenerative disorders of nervous system in diseases classified elsewhere
41270	G35	G35 Multiple sclerosis
41270	G360	G36.0 Neuromyelitis optica [Devic]
41270	G368	G36.8 Other specified acute disseminated demyelination
41270	G369	G36.9 Acute disseminated demyelination, unspecified
41270	G370	G37.0 Diffuse sclerosis
41270	G371	G37.1 Central demyelination of corpus callosum
41270	G372	G37.2 Central pontine myelinolysis
41270	G373	G37.3 Acute transverse myelitis in demyelinating disease of central nervous system
41270	G374	G37.4 Subacute necrotising myelitis
41270	G378	G37.8 Other specified demyelinating diseases of central nervous system
41270	G379	G37.9 Demyelinating disease of central nervous system, unspecified
41270	G400	G40.0 Localisation-related (focal) (partial) idiopathic epilepsy and epileptic syndromes with seizures of localised onset
41270	G401	G40.1 Localisation-related (focal) (partial) symptomatic epilepsy and epileptic syndromes with simple partial seizures
41270	G402	G40.2 Localisation-related (focal) (partial) symptomatic epilepsy and epileptic syndromes with complex partial seizures
41270	G403	G40.3 Generalised idiopathic epilepsy and epileptic syndromes
41270	G404	G40.4 Other generalised epilepsy and epileptic syndromes
41270	G405	G40.5 Special epileptic syndromes
41270	G406	G40.6 Grand mal seizures, unspecified (with or without petit mal)
41270	G407	G40.7 Petit mal, unspecified, without grand mal seizures
41270	G408	G40.8 Other epilepsy
41270	G409	G40.9 Epilepsy, unspecified
41270	G410	G41.0 Grand mal status epilepticus
41270	G411	G41.1 Petit mal status epilepticus
41270	G412	G41.2 Complex partial status epilepticus
41270	G418	G41.8 Other status epilepticus
41270	G419	G41.9 Status epilepticus, unspecified
41270	G430	G43.0 Migraine without aura [common migraine]
41270	G431	G43.1 Migraine with aura [classical migraine]
41270	G432	G43.2 Status migrainosus
41270	G433	G43.3 Complicated migraine
41270	G438	G43.8 Other migraine
41270	G439	G43.9 Migraine, unspecified
41270	G440	G44.0 Cluster headache syndrome
41270	G441	G44.1 Vascular headache, not elsewhere classified
41270	G442	G44.2 Tension-type headache
41270	G443	G44.3 Chronic posttraumatic headache
41270	G444	G44.4 Drug-induced headache, not elsewhere classified
41270	G448	G44.8 Other specified headache syndromes
41270	G450	G45.0 Vertebro-basilar artery syndrome
41270	G451	G45.1 Carotid artery syndrome (hemispheric)
41270	G452	G45.2 Multiple and bilateral precerebral artery syndromes
41270	G453	G45.3 Amaurosis fugax
41270	G454	G45.4 Transient global amnesia
41270	G458	G45.8 Other transient cerebral ischaemic attacks and related syndromes
41270	G459	G45.9 Transient cerebral ischaemic attack, unspecified
41270	G460	G46.0 Middle cerebral artery syndrome
41270	G461	G46.1 Anterior cerebral artery syndrome
41270	G462	G46.2 Posterior cerebral artery syndrome
41270	G463	G46.3 Brain stem stroke syndrome
41270	G464	G46.4 Cerebellar stroke syndrome
41270	G465	G46.5 Pure motor lacunar syndrome
41270	G466	G46.6 Pure sensory lacunar syndrome
41270	G467	G46.7 Other lacunar syndromes
41270	G468	G46.8 Other vascular syndromes of brain in cerebrovascular diseases
41270	G474	G47.4 Narcolepsy and cataplexy
41270	G500	G50.0 Trigeminal neuralgia
41270	G501	G50.1 Atypical facial pain
41270	G508	G50.8 Other disorders of trigeminal nerve
41270	G509	G50.9 Disorder of trigeminal nerve, unspecified
41270	G510	G51.0 Bell's palsy
41270	G511	G51.1 Geniculate ganglionitis
41270	G512	G51.2 Melkersson's syndrome
41270	G513	G51.3 Clonic hemifacial spasm
41270	G514	G51.4 Facial myokymia
41270	G518	G51.8 Other disorders of facial nerve
41270	G519	G51.9 Disorder of facial nerve, unspecified
41270	G520	G52.0 Disorders of olfactory nerve
41270	G521	G52.1 Disorders of glossopharyngeal nerve
41270	G522	G52.2 Disorders of vagus nerve
41270	G523	G52.3 Disorders of hypoglossal nerve
41270	G527	G52.7 Disorders of multiple cranial nerves
41270	G528	G52.8 Disorders of other specified cranial nerves
41270	G529	G52.9 Cranial nerve disorder, unspecified
41270	G530	G53.0 Postzoster neuralgia
41270	G531	G53.1 Multiple cranial nerve palsies in infectious and parasitic diseases classified elsewhere
41270	G532	G53.2 Multiple cranial nerve palsies in sarcoidosis
41270	G533	G53.3 Multiple cranial nerve palsies in neoplastic disease
41270	G538	G53.8 Other cranial nerve disorders in other diseases classified elsewhere
41270	G540	G54.0 Brachial plexus disorders
41270	G541	G54.1 Lumbosacral plexus disorders
41270	G542	G54.2 Cervical root disorders, not elsewhere classified
41270	G543	G54.3 Thoracic root disorders, not elsewhere classified
41270	G544	G54.4 Lumbosacral root disorders, not elsewhere classified
41270	G545	G54.5 Neuralgic amyotrophy
41270	G546	G54.6 Phantom limb syndrome with pain
41270	G547	G54.7 Phantom limb syndrome without pain
41270	G548	G54.8 Other nerve root and plexus disorders
41270	G549	G54.9 Nerve root and plexus disorder, unspecified
41270	G550	G55.0 Nerve root and plexus compressions in neoplastic disease
41270	G551	G55.1 Nerve root and plexus compressions in intervertebral disk disorders
41270	G552	G55.2 Nerve root and plexus compressions in spondylosis
41270	G553	G55.3 Nerve root and plexus compressions in other dorsopathies
41270	G558	G55.8 Nerve root and plexus compressions in other diseases classified elsewhere
41270	G560	G56.0 Carpal tunnel syndrome
41270	G561	G56.1 Other lesions of median nerve
41270	G562	G56.2 Lesion of ulnar nerve
41270	G563	G56.3 Lesion of radial nerve
41270	G564	G56.4 Causalgia
41270	G568	G56.8 Other mononeuropathies of upper limb
41270	G569	G56.9 Mononeuropathy of upper limb, unspecified
41270	G570	G57.0 Lesion of sciatic nerve
41270	G571	G57.1 Meralgia paraesthetica
41270	G572	G57.2 Lesion of femoral nerve
41270	G573	G57.3 Lesion of lateral popliteal nerve
41270	G574	G57.4 Lesion of medial popliteal nerve
41270	G575	G57.5 Tarsal tunnel syndrome
41270	G576	G57.6 Lesion of plantar nerve
41270	G578	G57.8 Other mononeuropathies of lower limb
41270	G579	G57.9 Mononeuropathy of lower limb, unspecified
41270	G580	G58.0 Intercostal neuropathy
41270	G587	G58.7 Mononeuritis multiplex
41270	G588	G58.8 Other specified mononeuropathies
41270	G589	G58.9 Mononeuropathy, unspecified
41270	G590	G59.0 Diabetic mononeuropathy
41270	G598	G59.8 Other mononeuropathies in diseases classified elsewhere
41270	G600	G60.0 Hereditary motor and sensory neuropathy
41270	G602	G60.2 Neuropathy in association with hereditary ataxia
41270	G603	G60.3 Idiopathic progressive neuropathy
41270	G608	G60.8 Other hereditary and idiopathic neuropathies
41270	G609	G60.9 Hereditary and idiopathic neuropathy, unspecified
41270	G610	G61.0 Guillain-Barre syndrome
41270	G611	G61.1 Serum neuropathy1
41270	G618	G61.8 Other inflammatory polyneuropathies
41270	G619	G61.9 Inflammatory polyneuropathy, unspecified
41270	G620	G62.0 Drug-induced polyneuropathy
41270	G621	G62.1 Alcoholic polyneuropathy
41270	G622	G62.2 Polyneuropathy due to other toxic agents
41270	G628	G62.8 Other specified polyneuropathies
41270	G629	G62.9 Polyneuropathy, unspecified
41270	G630	G63.0 Polyneuropathy in infectious and parasitic diseases classified elsewhere
41270	G631	G63.1 Polyneuropathy in neoplastic disease
41270	G632	G63.2 Diabetic polyneuropathy
41270	G633	G63.3 Polyneuropathy in other endocrine and metabolic diseases
41270	G634	G63.4 Polyneuropathy in nutritional deficiency
41270	G635	G63.5 Polyneuropathy in systemic connective tissue disorders
41270	G636	G63.6 Polyneuropathy in other musculoskeletal disorders
41270	G638	G63.8 Polyneuropathy in other diseases classified elsewhere
41270	G64	G64 Other disorders of peripheral nervous system
41270	G700	G70.0 Myasthenia gravis
41270	G702	G70.2 Congenital and developmental myasthenia
41270	G708	G70.8 Other specified myoneural disorders
41270	G709	G70.9 Myoneural disorder, unspecified
41270	G710	G71.0 Muscular dystrophy
41270	G711	G71.1 Myotonic disorders
41270	G712	G71.2 Congenital myopathies
41270	G713	G71.3 Mitochondrial myopathy, not elsewhere classified
41270	G718	G71.8 Other primary disorders of muscles
41270	G719	G71.9 Primary disorder of muscle, unspecified
41270	G720	G72.0 Drug-induced myopathy
41270	G721	G72.1 Alcoholic myopathy
41270	G722	G72.2 Myopathy due to other toxic agents
41270	G723	G72.3 Periodic paralysis
41270	G724	G72.4 Inflammatory myopathy, not elsewhere classified
41270	G728	G72.8 Other specified myopathies
41270	G729	G72.9 Myopathy, unspecified
41270	G730	G73.0 Myasthenic syndromes in endocrine diseases
41270	G731	G73.1 Eaton-Lambert syndrome
41270	G735	G73.5 Myopathy in endocrine diseases
41270	G736	G73.6 Myopathy in metabolic diseases
41270	G737	G73.7 Myopathy other diseases classified elsewhere
41270	G800	G80.0 Spastic cerebral palsy
41270	G801	G80.1 Spastic diplegia
41270	G802	G80.2 Infantile hemiplegia
41270	G803	G80.3 Dyskinetic cerebral palsy
41270	G808	G80.8 Other infantile cerebral palsy
41270	G809	G80.9 Infantile cerebral palsy, unspecified
41270	G810	G81.0 Flaccid hemiplegia
41270	G811	G81.1 Spastic hemiplegia
41270	G819	G81.9 Hemiplegia, unspecified
41270	G820	G82.0 Flaccid paraplegia
41270	G821	G82.1 Spastic paraplegia
41270	G822	G82.2 Paraplegia, unspecified
41270	G823	G82.3 Flaccid tetraplegia
41270	G824	G82.4 Spastic tetraplegia
41270	G825	G82.5 Tetraplegia, unspecified
41270	G830	G83.0 Diplegia of upper limbs
41270	G831	G83.1 Monoplegia of lower limb
41270	G832	G83.2 Monoplegia of upper limb
41270	G833	G83.3 Monoplegia, unspecified
41270	G834	G83.4 Cauda equina syndrome
41270	G835	G83.5 Locked-in syndrome
41270	G838	G83.8 Other specified paralytic syndromes
41270	G839	G83.9 Paralytic syndrome, unspecified
41270	G900	G90.0 Idiopathic peripheral autonomic neuropathy
41270	G901	G90.1 Familial dysautonomia [Riley-Day]
41270	G902	G90.2 Horner's syndrome
41270	G903	G90.3 Multisystem degeneration
41270	G904	G90.4 Autonomic dysreflexia
41270	G908	G90.8 Other disorders of autonomic nervous system
41270	G909	G90.9 Disorder of autonomic nervous system, unspecified
41270	G910	G91.0 Communicating hydrocephalus
41270	G911	G91.1 Obstructive hydrocephalus
41270	G912	G91.2 Normal-pressure hydrocephalus
41270	G913	G91.3 Posttraumatic hydrocephalus, unspecified
41270	G918	G91.8 Other hydrocephalus
41270	G919	G91.9 Hydrocephalus, unspecified
41270	G92	G92 Toxic encephalopathy
41270	G930	G93.0 Cerebral cysts
41270	G931	G93.1 Anoxic brain damage, not elsewhere classified
41270	G932	G93.2 Benign intracranial hypertension
41270	G933	G93.3 Postviral fatigue syndrome
41270	G934	G93.4 Encephalopathy, unspecified
41270	G935	G93.5 Compression of brain
41270	G936	G93.6 Cerebral oedema
41270	G937	G93.7 Reye's syndrome
41270	G938	G93.8 Other specified disorders of brain
41270	G939	G93.9 Disorder of brain, unspecified
41270	G940	G94.0 Hydrocephalus in infectious and parasitic diseases classified elsewhere
41270	G941	G94.1 Hydrocephalus in neoplastic disease
41270	G942	G94.2 Hydrocephalus in other diseases classified elsewhere
41270	G948	G94.8 Other specified disorders of brain in diseases classified elsewhere
41270	G950	G95.0 Syringomyelia and syringobulbia
41270	G951	G95.1 Vascular myelopathies
41270	G952	G95.2 Cord compression, unspecified
41270	G958	G95.8 Other specified diseases of spinal cord
41270	G959	G95.9 Disease of spinal cord, unspecified
41270	G960	G96.0 Cerebrospinal fluid leak
41270	G961	G96.1 Disorders of meninges, not elsewhere classified
41270	G968	G96.8 Other specified disorders of central nervous system
41270	G969	G96.9 Disorder of central nervous system, unspecified
41270	G970	G97.0 Cerebrospinal fluid leak from spinal puncture
41270	G971	G97.1 Other reaction to spinal and lumbar puncture
41270	G972	G97.2 Intracranial hypotension following ventricular shunting
41270	G978	G97.8 Other postprocedural disorders of nervous system
41270	G979	G97.9 Postprocedural disorder of nervous system, unspecified
41270	G98	G98 Other disorders of nervous system, not elsewhere classified
41270	G990	G99.0 Autonomic neuropathy in endocrine and metabolic diseases
41270	G991	G99.1 Other disorders of autonomic nervous system in other diseases classified elsewhere
41270	G992	G99.2 Myelopathy in diseases classified elsewhere
41270	G998	G99.8 Other specified disorders of nervous system in diseases classified elsewhere
41270	S0200	S02.00 Fracture of vault of skull (closed)
41270	S0201	S02.01 Fracture of vault of skull (open)
41270	S0210	S02.10 Fracture of base of skull (closed)
41270	S0211	S02.11 Fracture of base of skull (open)
41270	S0270	S02.70 Multiple fractures involving skull and facial bones (closed)
41270	S0271	S02.71 Multiple fractures involving skull and facial bones (open)
41270	S0280	S02.80 Fractures of other skull and facial bones (closed)
41270	S9281	S02.81 Fractures of other skull and facial bones (open)
41270	S0290	S02.90 Fracture of skull and facial bones, part unspecified (closed)
41270	S0291	S02.91 Fracture of skull and facial bones, part unspecified (open)
41270	S040	S04.0 Injury of optic nerve and pathways
41270	S041	S04.1 Injury of oculomotor nerve
41270	S042	S04.2 Injury of trochlear nerve
41270	S043	S04.3 Injury of trigeminal nerve
41270	S045	S04.5 Injury of facial nerve
41270	S048	S04.8 Injury of other cranial nerves
41270	S049	S04.9 Injury of unspecified cranial nerve
41270	S0600	S06.00 Concussion (without open intracranial wound)
41270	S0601	S06.01 Concussion (with open intracranial wound)
41270	S0610	S06.10 Traumatic cerebral oedema (without open intracranial wound)
41270	S0620	S06.20 Diffuse brain injury (without open intracranial wound)
41270	S0621	S06.21 Diffuse brain injury (with open intracranial wound)
41270	S0630	S06.30 Focal brain injury (without open intracranial wound)
41270	S0631	S06.31 Focal brain injury (with open intracranial wound)
41270	S0640	S06.40 Epidural haemorrhage (without open intracranial wound)
41270	S0641	S06.41 Epidural haemorrhage (with open intracranial wound)
41270	S0650	S06.50 Traumatic subdural haemorrhage (without open intracranial wound)
41270	S0651	S06.51 Traumatic subdural haemorrhage (with open intracranial wound)
41270	S0660	S06.60 Traumatic subarachnoid haemorrhage (without open intracranial wound)
41270	S0661	S06.61 Traumatic subarachnoid haemorrhage (with open intracranial wound)
41270	S0670	S06.70 Intracranial injury with prolonged coma (without open intracranial wound)
41270	S0680	S06.80 Other intracranial injuries (without open intracranial wound)
41270	S0681	S06.81 Other intracranial injuries (with open intracranial wound)
41270	S0690	S06.90 Intracranial injury, unspecified (without open intracranial wound)
41270	S0691	S06.91 Intracranial injury, unspecified (with open intracranial wound)
41270	S097	S09.7 Multiple injuries of head
41270	S099	S09.9 Unspecified injury of head
41270	T901	T90.1 Sequelae of open wound of head
41270	T902	T90.2 Sequelae of fracture of skull and facial bones
41270	T903	T90.3 Sequelae of injury of cranial nerves
41270	T904	T90.5 Sequelae of intracranial injury
41270	T908	T90.8 Sequelae of other specified injuries of head
41270	T909	T90.9 Sequelae of unspecified injury of head
41270	T913	T91.3 Sequelae of injury of spinal cord

## Sheet: Psychotropic drugs (exclusion)
Codes for the psychotropic medications used as exclusion criteria
Field ID	Code	Description
20003	1140921600	citalopram
20003	1141180212	escitalopram
20003	1141190158	cipralex 5mg tablet
20003	1141151946	cipramil 10mg tablet
20003	1140879540	fluoxetine
20003	1140867876	prozac 20mg capsule
20003	1140867878	sertraline
20003	1140879544	fluvoxamine
20003	1140867860	faverin 50mg tablet
20003	1140867888	paroxetine
20003	1140882236	seroxat 20mg tablet
20003	1140867884	lustral 50mg tablet
20003	1140916282	venlafaxine
20003	1141200564	duloxetine
20003	1141201834	cymbalta 30mg gastro-resistant capsule
20003	1140916288	efexor 37.5mg tablet
20003	1140917460	nefazodone
20003	1140917466	dutonin 100mg tablet
20003	1140879634	trazodone
20003	1141151978	reboxetine
20003	1141151982	edronax 4mg tablet
20003	1140879688	viloxazine
20003	1140867770	vivalan 50mg tablet
20003	1141199446	atomoxetine
20003	1141199460	strattera 10mg capsule
20003	1141176854	bupropion
20003	1140879616	amitriptyline
20003	1140867938	amitriptyline+chlordiazepoxide 12.5mg/5mg capsule
20003	1140867948	amitriptyline hydrochloride+perphenazine 10mg/2mg tablet
20003	1140867658	elavil 10mg tablet
20003	1140879620	clomipramine
20003	1140867690	anafranil 10mg capsule
20003	1140879624	desipramine
20003	1140909806	dosulepin
20003	1140867624	prothiaden 25mg capsule
20003	1141168396	doxepin hydrochloride 5% cream
20003	1140882312	sinequan 10mg capsule
20003	1140879630	imipramine
20003	1140867712	tofranil 10mg tablet
20003	1140867726	lofepramine
20003	1141146062	lomont 70mg/5ml s/f suspension
20003	1140882310	gamanil 70mg tablet
20003	1140867818	nortriptyline
20003	1140867940	fluphenazine hydrochloride+nortriptyline 1.5mg/30mg tablet
20003	1140867942	fluphenazine hcl+nortriptyline 500micrograms/10mg tablet
20003	1140867824	aventyl 10mg capsule
20003	1140879632	protriptyline
20003	1140867756	trimipramine
20003	1140867758	surmontil 10mg tablet
20003	1140867720	iprindole
20003	1140867722	prondol 15mg tablet
20003	1140867734	concordin 5mg tablet
20003	1140856074	butriptyline
20003	1140856076	evadyne 25mg tablet
20003	1140867774	amoxapine
20003	1140867840	asendis 25mg tablet
20003	1140879552	maprotiline
20003	1140867784	ludiomil 10mg tablet
20003	1140879556	mianserin
20003	1141152732	mirtazapine
20003	1140867856	isocarboxazid
20003	1140867858	marplan 10mg tablet
20003	1140910704	maoi - phenelzine
20003	140867850	phenelzine
20003	1140867852	nardil 15mg tablet
20003	1140867914	tranylcypromine
20003	1140867916	parnate 10mg tablet
20003	1140879668	selegiline
20003	1140872348	eldepryl 5mg tablet
20003	1141169666	zelapar 1.25mg tablet
20003	1140867920	moclobemide
20003	1140867922	manerix 150mg tablet
20003	1140867960	tryptophan product
20003	1140879674	pipothiazine
20003	1141153490	amisulpride
20003	1141184742	solian 100mg/ml s/f oral solution
20003	1141195974	aripiprazole
20003	1141202024	abilify 5mg tablet
20003	1140928916	olanzapine
20003	1141167976	zyprexa 2.5mg tablet
20003	1141152848	quetiapine
20003	1141152860	seroquel 25mg tablet
20003	1140867444	risperidone
20003	1141177762	risperdal 0.5mg tablet
20003	1140867078	benperidol
20003	1140867084	droperidol
20003	1140867080	anquil 250micrograms tablet
20003	1140867086	droleptan 10mg tablet
20003	1140867168	haloperidol
20003	1140867180	dozic 1mg/ml oral liquid
20003	1140867184	haldol 5mg tablet
20003	1140867092	serenace 500micrograms capsule
20003	1140867546	fluspirilene
20003	1140867548	redeptin 2mg/1ml injection
20003	1140867218	pimozide
20003	1140879658	chlorpromazine
20003	1140910358	cpz - chlorpromazine
20003	1140867398	fluphenazine decanoate
20003	1140867940	fluphenazine hydrochloride+nortriptyline 1.5mg/30mg tablet
20003	1140867942	fluphenazine hcl+nortriptyline 500micrograms/10mg tablet
20003	1140867944	tranylcypromine+trifluoperazine 10mg/1mg tablet
20003	1140867948	amitriptyline hydrochloride+perphenazine 10mg/2mg tablet
20003	1140909802	levomepromazine
20003	1140867122	nozinan 25mg tablet
20003	1140867134	pericyazine
20003	1140867136	neulactil 2.5mg tablet
20003	1140867208	perphenazine
20003	1140867210	fentazin 2mg tablet
20003	1140909804	pipotiazine
20003	1140867572	piportil depot 50mg/1ml oily injection
20003	1140868170	prochlorperazine
20003	1140868172	stemetil 5mg tablet
20003	1140879746	promazine
20003	1140867288	sparine 50mg/5ml suspension
20003	1140882082	promethazine product
20003	1140879750	thioridazine
20003	1140867312	melleril 10mg tablet
20003	1140867304	sulpiride
20003	1140868120	trifluoperazine
20003	1140867244	stelazine 1mg tablet
20003	1140856052	chlorprothixene
20003	1140882100	zuclopenthixol
20003	1140867150	flupenthixol
20003	1140867152	depixol 3mg tablet
20003	1140867156	moditen 1mg tablet
20003	1140867342	clopixol 2mg tablet
20003	1140867306	dolmatil 200mg tablet
20003	1141185130	sulpor 200mg/5ml oral solution
20003	1140867406	loxapine
20003	1140867414	loxapac 10mg capsule
20003	1140867420	clozapine
20003	1140879704	remoxipride
20003	1140867432	roxiam 150mg m/r capsule
20003	1140882320	clozaril 25mg tablet
20003	1141169714	zotepine
20003	1141169722	zoleptil 25mg tablet
20003	1140927956	sertindole
20003	1140927970	serdolect 4mg tablet
20003	1140855960	fortunan 500micrograms tablet
20003	1141200004	pregabalin
20003	1141200072	lyrica 25mg capsule
20003	1140883656	hydroxyzine
20003	1140863286	atarax 10mg tablet
20003	1140863292	ucerax 25mg tablet
20003	1140863302	lorazepam
20003	1140863308	alprazolam
20003	1140863310	xanax 250mcg tablet
20003	1140863318	bromazepam
20003	1140863320	lexotan 1.5mg tablet
20003	1140863364	ativan 1mg tablet
20003	1140863372	medazepam
20003	1140863374	nobrium 5mg capsule
20003	1140863268	clobazam
20003	1140863272	frisium 10mg capsule
20003	1140863274	potassium clorazepate
20003	1140863276	tranxene 7.5mg capsule
20003	1140863152	diazepam
20003	1140863164	rimapam 2mg tablet
20003	1140863170	diazemuls 10mg/2ml injection
20003	1140863172	dialar 2mg/5ml syrup
20003	1140863234	stesolid 5mg rectal solution
20003	1140863238	tensium 2mg tablet
20003	1140863244	valium 2mg tablet
20003	1140863250	valium 2mg/5ml syrup
20003	1140863442	oxazepam
20003	1140863454	buspar 5mg tablet
20003	1140879730	buspirone
20003	1140855944	prazepam
20003	1140855946	centrax 10mg tablet
20003	1140863328	chlordiazepoxide
20003	1140863350	librium 5mg tablet
20003	1140872150	clonazepam
20003	1140872152	rivotril 500mcg tablet
20003	1140856092	pacitron 500mg tablet
20003	1140856108	villescon tablet

## Sheet: Endocrine (exclusion)
Codes for the endocrine conditions used as exclusion criteria for the control group
Field ID	Code	Description
20002	1214	testicular problems (not cancer)
20002	1220	diabetes
20002	1221	gestational diabetes
20002	1222	type 1 diabetes
20002	1223	type 2 diabetes
20002	1224	thyroid problem (not cancer)
20002	1225	hyperthyroidism/thyrotoxicosis
20002	1226	hypothyroidism/myxoedema
20002	1228	thyroid radioablation therapy
20002	1229	parathyroid gland problem (not cancer)
20002	1230	parathyroid hyperplasia/adenoma
20002	1232	disorder of adrenal gland
20002	1233	adrenal tumour
20002	1234	adrenocortical insufficiency/addison's disease
20002	1235	hyperaldosteronism/conn's syndrome
20002	1236	phaeochromocytoma
20002	1237	disorder or pituitary gland
20002	1238	pituitary adenoma/tumour
20002	1239	cushings syndrome
20002	1350	polycystic ovaries/polycystic ovarian syndrome
20002	1428	thyroiditis
20002	1429	acromegaly
20002	1430	hypopituitarism
20002	1431	hyperprolactinaemia
20002	1432	carcinoid syndrome/tumour
20002	1521	diabetes insipidus
20002	1522	grave's disease
20002	1610	thyroid goitre
20002	1611	hyperparathyroidism
20002	1682	benign insulinoma
41270	C73	C73 Malignant neoplasm of thyroid gland
41270	C740	C74.0 Cortex of adrenal gland
41270	C741	C74.1 Medulla of adrenal gland
41270	C749	C74.9 Adrenal gland, unspecified
41270	C750	C75.0 Parathyroid gland
41270	C751	C75.1 Pituitary gland
41270	C752	C75.2 Craniopharyngeal duct
41270	C753	C75.3 Pineal gland
41270	C754	C75.4 Carotid body
41270	C755	C75.5 Aortic body and other paraganglia
41270	C758	C75.8 Pluriglandular involvement, unspecified
41270	C759	C75.9 Endocrine gland, unspecified
41270	E011	E01.1 Iodine-deficiency-related multinodular (endemic) goitre
41270	E018	E01.8 Other iodine-deficiency-related thyroid disorders and allied conditions
41270	E02	E02 Subclinical iodine-deficiency hypothyroidism
41270	E030	E03.0 Congenital hypothyroidism with diffuse goitre
41270	E031	E03.1 Congenital hypothyroidism without goitre
41270	E032	E03.2 Hypothyroidism due to medicaments and other exogenous substances
41270	E033	E03.3 Postinfectious hypothyroidism
41270	E034	E03.4 Atrophy of thyroid (acquired)
41270	E035	E03.5 Myxoedema coma
41270	E038	E03.8 Other specified hypothyroidism
41270	E039	E03.9 Hypothyroidism, unspecified
41270	E040	E04.0 Non-toxic diffuse goitre
41270	E041	E04.1 Non-toxic single thyroid nodule
41270	E042	E04.2 Non-toxic multinodular goitre
41270	E048	E04.8 Other specified non-toxic goitre
41270	E049	E04.9 Non-toxic goitre, unspecified
41270	E050	E05.0 Thyrotoxicosis with diffuse goitre
41270	E051	E05.1 Thyrotoxicosis with toxic single thyroid nodule
41270	E052	E05.2 Thyrotoxicosis with toxic multinodular goitre
41270	E053	E05.3 Thyrotoxicosis from ectopic thyroid tissue
41270	E054	E05.4 Thyrotoxicosis factitia
41270	E055	E05.5 Thyroid crisis or storm
41270	E058	E05.8 Other thyrotoxicosis
41270	E059	E05.9 Thyrotoxicosis, unspecified
41270	E060	E06.0 Acute thyroiditis
41270	E061	E06.1 Subacute thyroiditis
41270	E062	E06.2 Chronic thyroiditis with transient thyrotoxicosis
41270	E063	E06.3 Autoimmune thyroiditis
41270	E064	E06.4 Drug-induced thyroiditis
41270	E065	E06.5 Other chronic thyroiditis
41270	E069	E06.9 Thyroiditis, unspecified
41270	E070	E07.0 Hypersecretion of calcitonin
41270	E071	E07.1 Dyshormogenetic goitre
41270	E078	E07.8 Other specified disorders of thyroid
41270	E079	E07.9 Disorder of thyroid, unspecified
41270	E100	E10.0 With coma
41270	E101	E10.1 With ketoacidosis
41270	E102	E10.2 With renal complications
41270	E103	E10.3 With ophthalmic complications
41270	E104	E10.4 With neurological complications
41270	E105	E10.5 With peripheral circulatory complications
41270	E106	E10.6 With other specified complications
41270	E107	E10.7 With multiple complications
41270	E108	E10.8 With unspecified complications
41270	E109	E10.9 Without complications
41270	E110	E11.0 With coma
41270	E111	E11.1 With ketoacidosis
41270	E112	E11.2 With renal complications
41270	E113	E11.3 With ophthalmic complications
41270	E114	E11.4 With neurological complications
41270	E115	E11.5 With peripheral circulatory complications
41270	E116	E11.6 With other specified complications
41270	E117	E11.7 With multiple complications
41270	E118	E11.8 With unspecified complications
41270	E119	E11.9 Without complications
41270	E121	E12.1 With ketoacidosis
41270	E123	E12.3 With ophthalmic complications
41270	E125	E12.5 With peripheral circulatory complications
41270	E128	E12.8 With unspecified complications
41270	E129	E12.9 Without complications
41270	E130	E13.0 With coma
41270	E131	E13.1 With ketoacidosis
41270	E132	E13.2 With renal complications
41270	E133	E13.3 With ophthalmic complications
41270	E134	E13.4 With neurological complications
41270	E135	E13.5 With peripheral circulatory complications
41270	E136	E13.6 With other specified complications
41270	E137	E13.7 With multiple complications
41270	E138	E13.8 With unspecified complications
41270	E139	E13.9 Without complications
41270	E140	E14.0 With coma
41270	E141	E14.1 With ketoacidosis
41270	E142	E14.2 Withrenal complications
41270	E143	E14.3 With ophthalmic complications
41270	E144	E14.4 With neurological complications
41270	E145	E14.5 With peripheral circulatory complications
41270	E146	E14.6 With other specified complications
41270	E147	E14.7 With multiple complications
41270	E148	E14.8 With unspecified complications
41270	E149	E14.9 Without complications
41270	E15	E15 Nondiabetic hypoglycaemic coma
41270	E160	E16.0 Drug-induced hypoglycaemia without coma
41270	E161	E16.1 Other hypoglycaemia
41270	E162	E16.2 Hypoglycaemia, unspecified
41270	E163	E16.3 Increased secretion of glucagon
41270	E164	E16.4 Abnormal secretion of gastrin
41270	E168	E16.8 Other specified disorders of pancreatic internal secretion
41270	E169	E16.9 Disorder of pancreatic internal secretion, unspecified
41270	E200	E20.0 Idiopathic hypoparathyroidism
41270	E201	E20.1 Pseudohypoparathyroidism
41270	E208	E20.8 Other hypoparathyroidism
41270	E209	E20.9 Hypoparathyroidism, unspecified
41270	E210	E21.0 Primary hyperparathyroidism
41270	E211	E21.1 Secondary hyperparathyroidism, not elsewhere classified
41270	E212	E21.2 Other hyperparathyroidism
41270	E213	E21.3 Hyperparathyroidism, unspecified
41270	E214	E21.4 Other specified disorders of parathyroid gland
41270	E215	E21.5 Disorder of parathyroid gland, unspecified
41270	E220	E22.0 Acromegaly and pituitary gigantism
41270	E221	E22.1 Hyperprolactinaemia
41270	E222	E22.2 Syndrome of inappropriate secretion of antidiuretic hormone
41270	E228	E22.8 Other hyperfunction of pituitary gland
41270	E229	E22.9 Hyperfunction of pituitary gland, unspecified
41270	E230	E23.0 Hypopituitarism
41270	E231	E23.1 Drug-induced hypopituitarism
41270	E232	E23.2 Diabetes insipidus
41270	E233	E23.3 Hypothalamic dysfunction, not elsewhere classified
41270	E236	E23.6 Other disorders of pituitary gland
41270	E237	E23.7 Disorder of pituitary gland, unspecified
41270	E240	E24.0 Pituitary-dependent Cushing's disease
41270	E241	E24.1 Nelson's syndrome
41270	E242	E24.2 Drug-induced Cushing's syndrome
41270	E243	E24.3 Ectopic ACTH syndrome
41270	E244	E24.4 Alcohol-induced pseudo-Cushing's syndrome
41270	E248	E24.8 Other Cushing's syndrome
41270	E249	E24.9 Cushing's syndrome, unspecified
41270	E250	E25.0 Congenital adrenogenital disorders associated with enzyme deficiency
41270	E258	E25.8 Other adrenogenital disorders
41270	E259	E25.9 Adrenogenital disorder, unspecified
41270	E270	E27.0 Other adrenocortical overactivity
41270	E271	E27.1 Primary adrenocortical insufficiency
41270	E272	E27.2 Addisonian crisis
41270	E273	E27.3 Drug-induced adrenocortical insufficiency
41270	E274	E27.4 Other and unspecified adrenocortical insufficiency
41270	E275	E27.5 Adrenomedullary hyperfunction
41270	E278	E27.8 Other specified disorders of adrenal gland
41270	E279	E27.9 Disorder of adrenal gland, unspecified
41270	E281	E28.1 Androgen excess
41270	E282	E28.2 Polycystic ovarian syndrome
41270	E283	E28.3 Primary ovarian failure
41270	E288	E28.8 Other ovarian dysfunction
41270	E289	E28.9 Ovarian dysfunction, unspecified
41270	E290	E29.0 Testicular hyperfunction
41270	E291	E29.1 Testicular hypofunction
41270	E298	E29.8 Other testicular dysfunction
41270	E299	E29.9 Testicular dysfunction, unspecified
41270	E351	E35.1 Disorders of adrenal glands in diseases classified elsewhere
41270	E340	E34.0 Carcinoid syndrome

## Sheet: Cognitive parameters
Field ID	Description
20023	Mean time to correctly identify matches (Reaction time)
20016	Fluid intelligence score (Fluid intelligence)
6348	Duration to complete numeric path (trail #1) (Trail making A)
6350	Duration to complete alphanumeric path (trail #2) (Trail making B)
23324	Number of symbol digit matches made correctly (Symbol digit substitution)
4282	Maximum digits remembered correctly (Digit span)

## Sheet: Emotional parameters
Field ID	Description
2050	Frequency of depressed mood in last 2 weeks
2060	Frequency of unenthusiasm / disinterest in last 2 weeks
2070	Frequency of tenseness / restlessness in last 2 weeks
2080	Frequency of tiredness / lethargy in last 2 weeks

## Sheet: Demographics and confounds
Field ID	Description
31	Sex
21003	Age when attended assessment center
6138	Qualifications (education)
20116	Smoking status
53	Year of imaging
54	Assessment center
25756	Scanner lateral (X) brain position
25757	Scanner transverse (Y) brain position
25758	Scanner longitudinal (Z) brain position
25759	Scanner table position
25000	Volumetric scaling from T1 head image to standard space (measure of head size)
23104	Body mass index measured by body impedance
23099	Total body fat percentage measured by body impedance
